# Supplementary material for: Identification of 9 key genes and small molecule drugs in clear cell renal cell carcinoma
Source: Aging (Albany NY). 2019 Aug 18;11(16):6029–52. doi: 10.18632/aging.102161 (PMC6738436; doi:10.18632/aging.102161)
Supplement: Supplementary Figures [file aging-11-102161-s006.pdf]

## SUPPLEMENTARY FIGURES

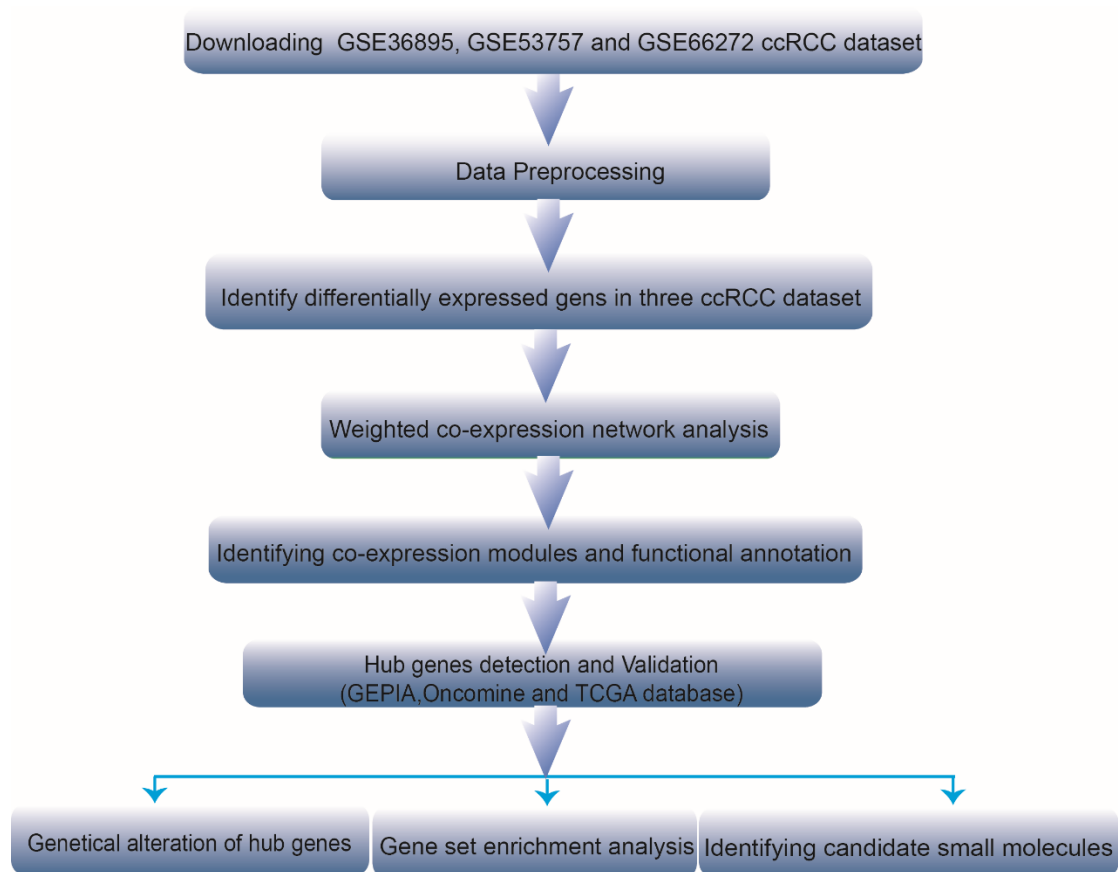

**Supplementary Figure 1.** Flow chart of data preparation, processing, analysis and validation in this study.

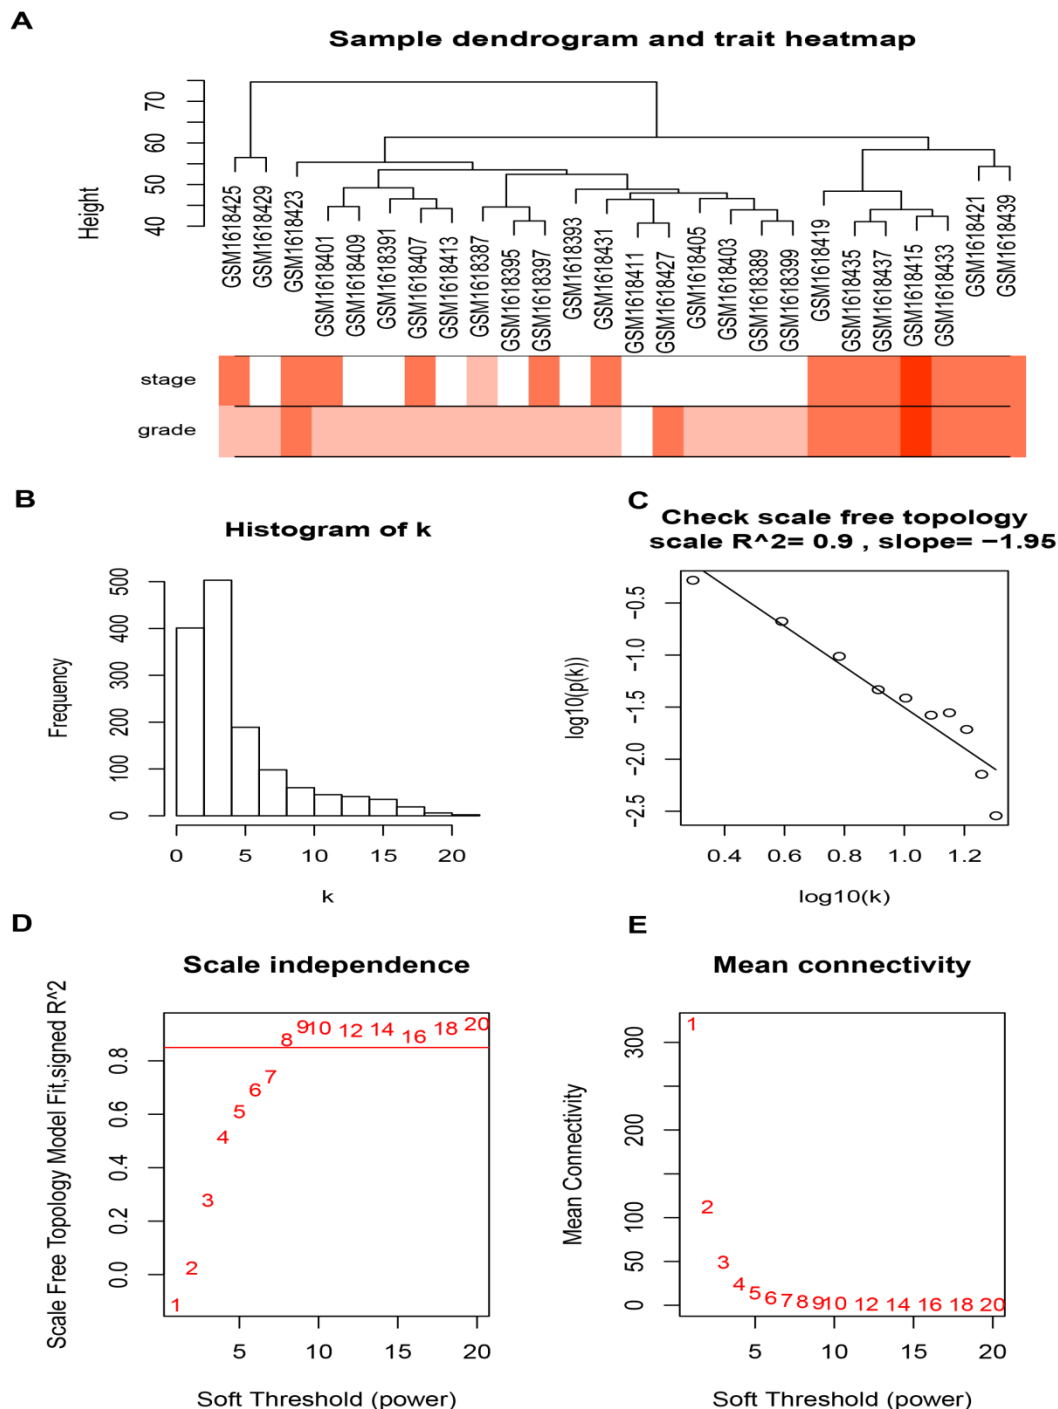

**Supplementary Figure 2. Clustering dendrogram of ccRCC tumor samples and the clinical traits, and determination of soft-thresholding power.** (A) The clustering was based on the common differentially expressed genes in ccRCC. The red color represented stage and grade. The color intensity was proportional to higher pathological stage and grade. (B) Analysis of the scale-free fit index for various soft-thresholding powers ( $\beta$ ). (C) Analysis of the mean connectivity for various soft-thresholding powers. (D) Histogram of connectivity distribution when  $\beta = 8$ . (E) Checking the scale free topology when  $\beta = 8$ .

|                             | PTTG1             |    | RRM2              |    | TOP2A             |    | UHRF1             |   | CEP55             |    | BIRC5             |    | UBE2C             |   | FOXO1             |   | CDC20             |    |
|-----------------------------|-------------------|----|-------------------|----|-------------------|----|-------------------|---|-------------------|----|-------------------|----|-------------------|---|-------------------|---|-------------------|----|
| Analysis Type by Cancer     | Cancer vs. Normal |    | Cancer vs. Normal |    | Cancer vs. Normal |    | Cancer vs. Normal |   | Cancer vs. Normal |    | Cancer vs. Normal |    | Cancer vs. Normal |   | Cancer vs. Normal |   | Cancer vs. Normal |    |
| Bladder Cancer              | 5                 |    | 6                 | 1  | 9                 |    | 1                 |   | 4                 |    | 3                 |    | 6                 |   | 4                 |   | 6                 |    |
| Brain and CNS Cancer        | 7                 | 1  | 12                | 1  | 15                | 1  | 10                | 1 | 7                 | 1  | 12                | 1  | 14                | 1 | 14                | 1 | 8                 | 2  |
| Breast Cancer               | 30                | 1  | 19                | 1  | 31                | 1  | 21                | 1 | 24                | 1  | 16                | 1  | 31                |   | 17                |   | 21                | 1  |
| Cervical Cancer             | 3                 |    | 4                 |    | 5                 |    | 2                 |   | 4                 |    | 3                 |    | 3                 |   | 4                 |   | 3                 |    |
| Colorectal Cancer           | 11                |    | 18                |    | 23                |    | 15                |   | 20                |    | 12                |    | 20                |   | 9                 |   | 9                 |    |
| Esophageal Cancer           | 2                 | 2  | 3                 |    | 5                 |    | 2                 |   | 6                 |    | 2                 |    | 6                 |   | 5                 |   | 3                 |    |
| Gastric Cancer              | 6                 |    | 5                 |    | 11                |    | 5                 |   | 7                 |    | 5                 | 1  | 9                 |   | 7                 |   | 5                 |    |
| Head and Neck Cancer        | 6                 |    | 9                 |    | 12                |    | 5                 |   | 11                |    | 6                 |    | 6                 |   | 7                 |   | 9                 |    |
| Kidney Cancer               | 3                 |    | 4                 |    | 5                 |    | 1                 |   | 5                 | 1  | 2                 | 5  | 3                 |   | 2                 |   | 1                 |    |
| Leukemia                    | 1                 | 3  | 2                 | 11 | 3                 | 10 | 8                 | 4 | 2                 | 2  | 4                 | 8  |                   | 6 | 1                 | 3 | 1                 | 9  |
| Liver Cancer                | 4                 |    | 5                 |    | 4                 |    | 1                 |   | 2                 |    | 3                 | 1  | 4                 |   | 4                 |   | 3                 |    |
| Lung Cancer                 | 15                |    | 15                |    | 21                | 1  | 5                 |   | 11                |    | 12                | 2  | 19                | 1 | 15                |   | 12                | 1  |
| Lymphoma                    | 12                | 1  | 22                | 1  | 12                | 2  | 6                 |   | 9                 |    | 16                |    | 9                 |   | 13                |   | 12                | 2  |
| Melanoma                    | 3                 |    | 2                 |    | 3                 | 1  | 1                 |   | 3                 |    | 3                 |    | 2                 |   | 2                 |   | 2                 |    |
| Myeloma                     | 1                 |    | 2                 |    | 2                 |    |                   |   | 1                 |    | 1                 |    |                   |   |                   |   |                   | 2  |
| Other Cancer                | 5                 | 10 | 9                 |    | 11                | 5  | 6                 | 1 | 7                 | 7  | 7                 | 2  | 13                |   | 10                | 1 | 6                 | 2  |
| Ovarian Cancer              | 4                 |    | 5                 |    | 7                 |    | 3                 |   | 5                 |    | 3                 |    | 8                 |   | 6                 |   | 4                 |    |
| Pancreatic Cancer           | 5                 |    | 2                 |    | 6                 | 1  | 2                 |   | 3                 |    | 2                 | 1  | 2                 |   | 3                 |   | 3                 |    |
| Prostate Cancer             |                   |    | 2                 |    | 3                 |    | 2                 |   | 1                 |    | 4                 |    | 1                 |   |                   |   |                   |    |
| Sarcoma                     | 11                |    | 11                |    | 14                |    |                   |   | 9                 |    | 13                |    | 11                | 1 | 12                |   | 12                | 1  |
| Significant Unique Analyses | 132               | 18 | 155               | 15 | 200               | 22 | 96                | 7 | 139               | 12 | 126               | 22 | 166               | 9 | 134               | 5 | 118               | 20 |
| Total Unique Analyses       | 422               |    | 449               |    | 462               |    | 291               |   | 387               |    | 464               |    | 450               |   | 455               |   | 415               |    |

Supplementary Figure 3. Gene expression level of 9 key genes (based on Oncomine database).

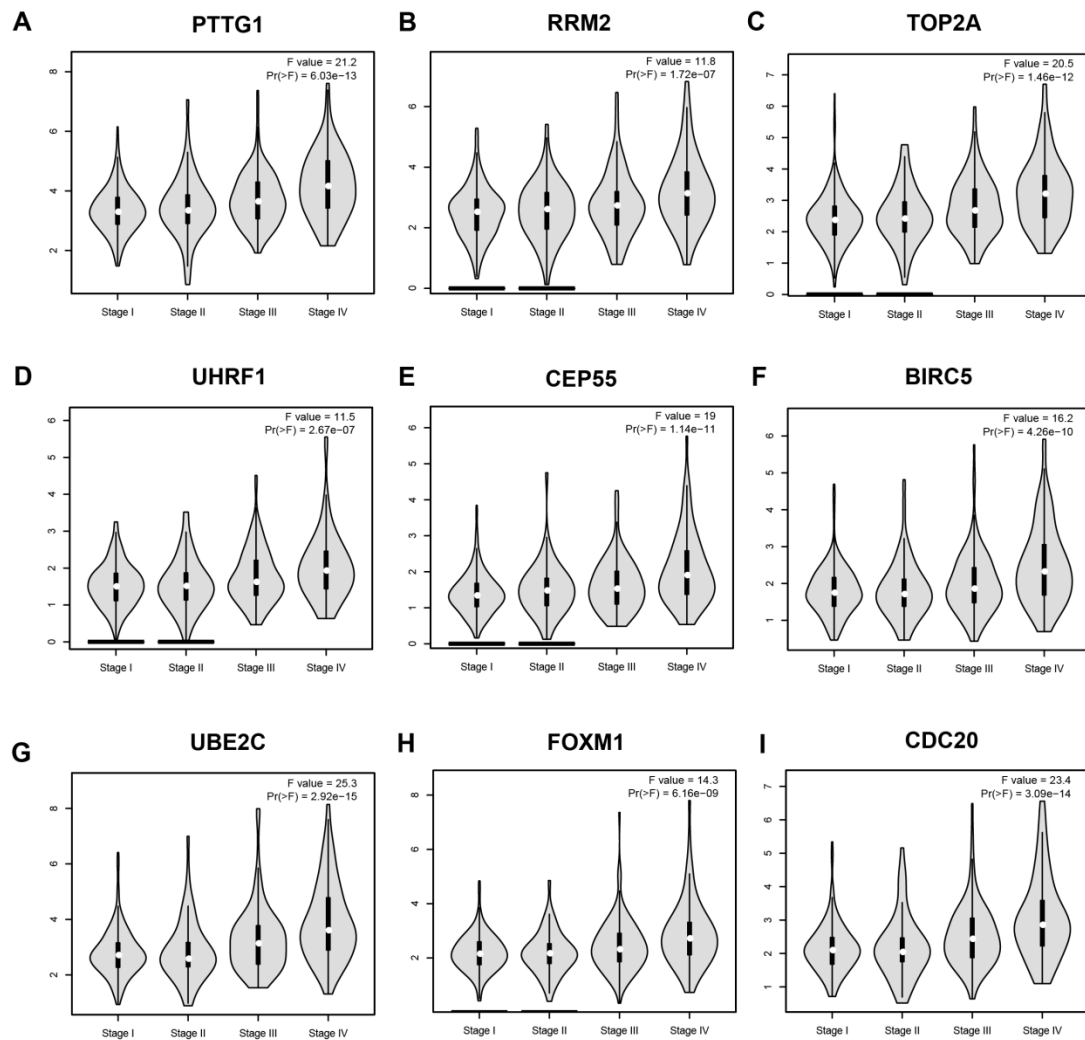

**Supplementary Figure 4. Validation of the correlation between 9 key genes expression levels and the pathologic stages of ccRCC (based on ccRCC data in GEPIA database). (A) PTTG1, (B) RRM2, (C) TOP2A, (D) UHRF1, (E) CEP55, (F) BIRC5, (G) UBE2C, (H) FOXM1 and (I) CDC20.**

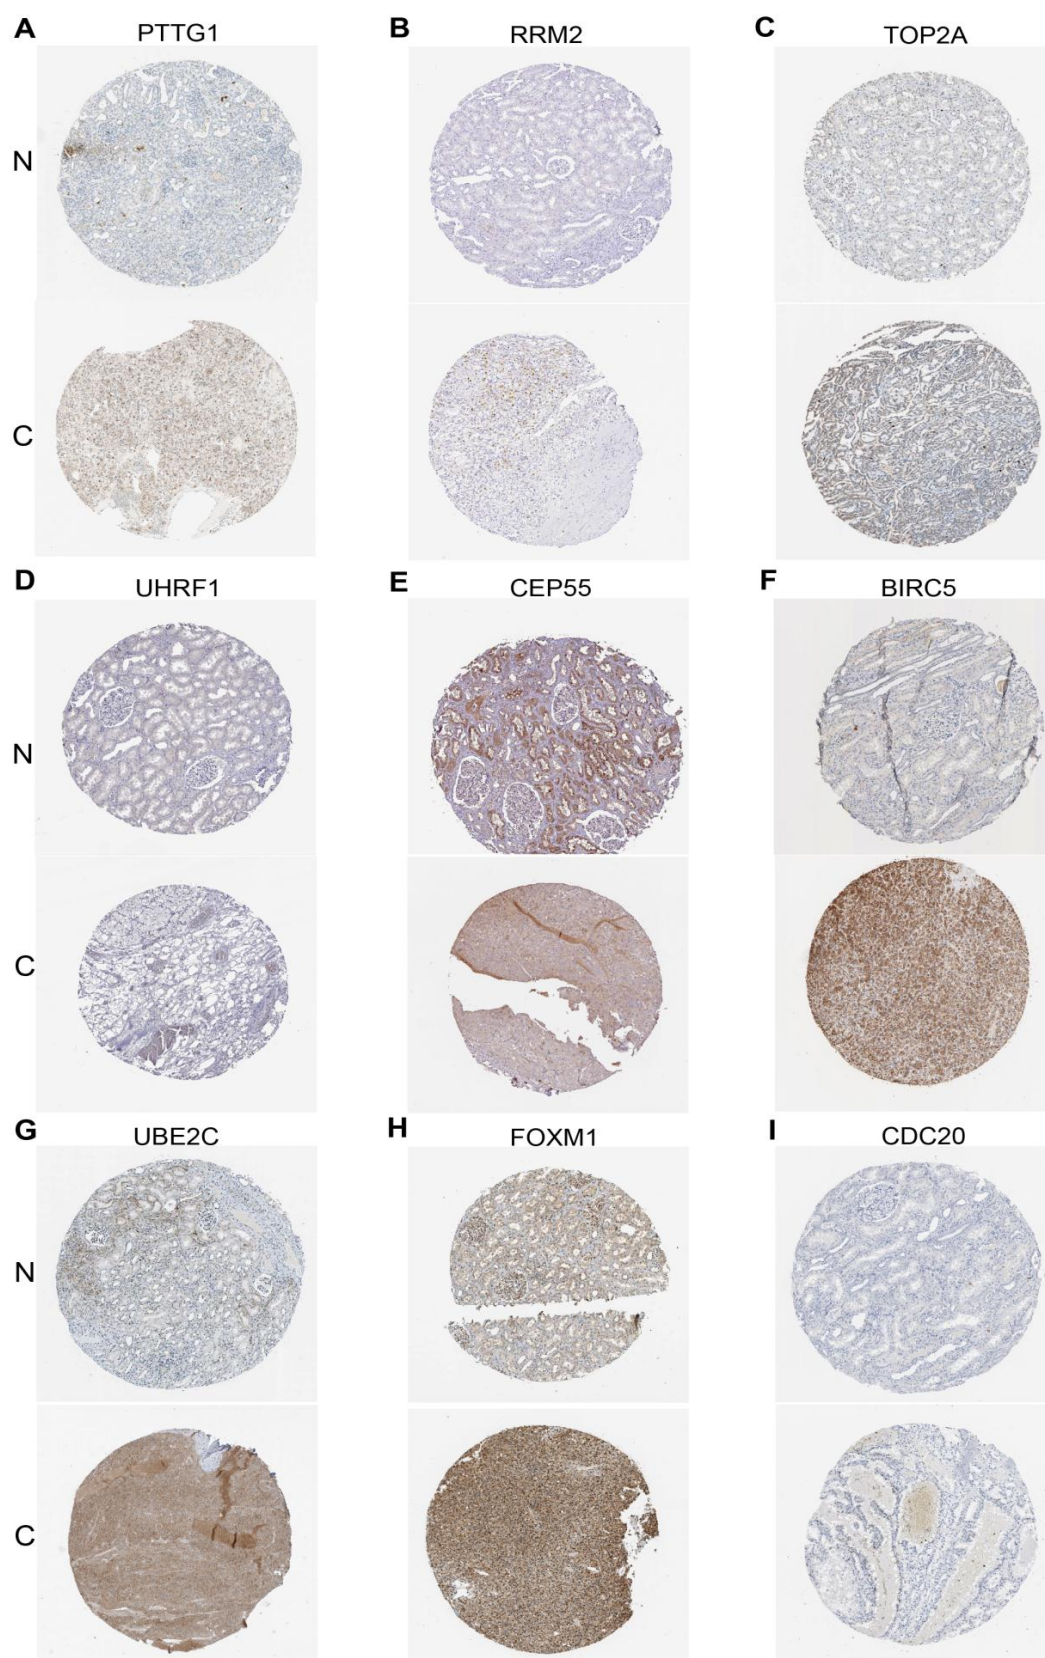

**Supplementary Figure 5. Immunohistochemistry of the 9 key genes based on the Human Protein Atlas. (A) PTTG1, (B) RRM2, (C) TOP2A, (D) UHRF1, (E) CEP55, (F) BIRC5, (G) UBE2C, (H) FOXM1, (I) CDC20.**

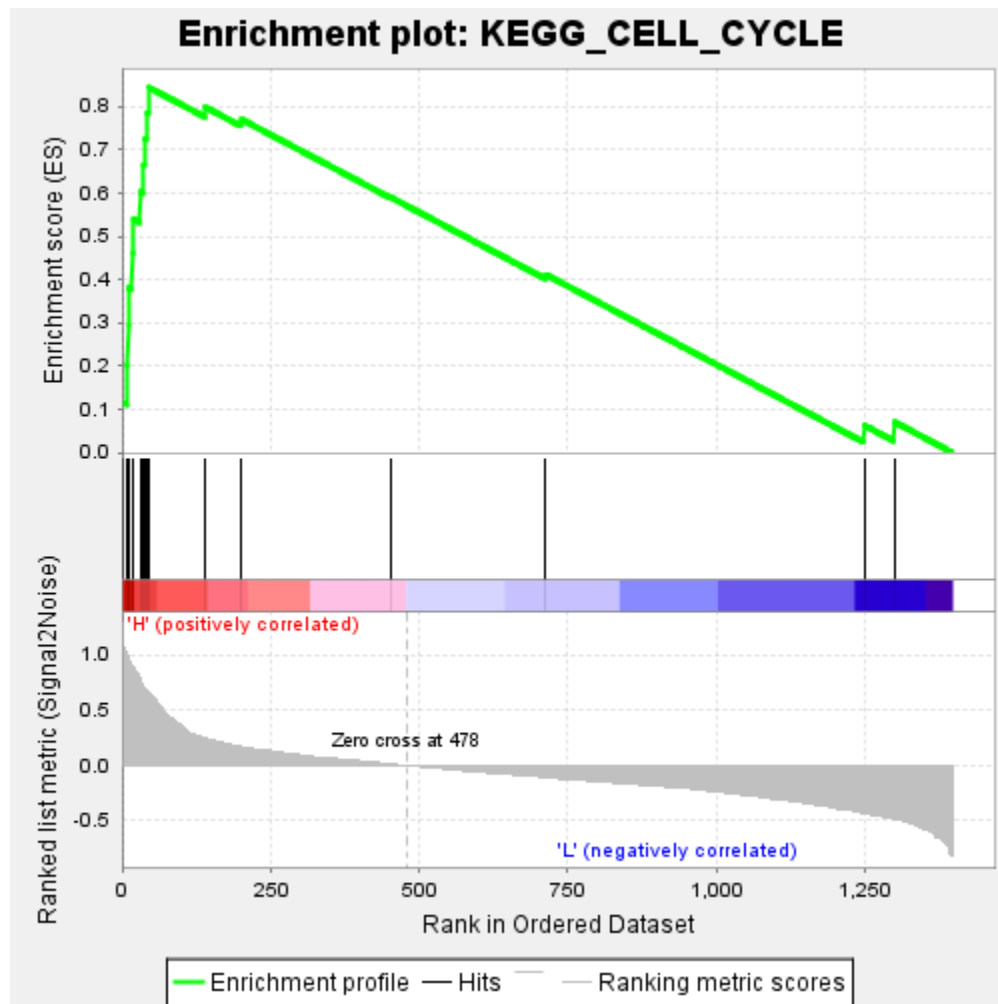

Supplementary Figure 6. Gene set enrichment analysis (GSEA). Only listed the common functional gene sets enriched in ccTCC with 9 key genes highly expressed.
