# Supplementary material for: Identification of 9 key genes and small molecule drugs in clear cell renal cell carcinoma
Source: Aging (Albany NY). 2019 Aug 18;11(16):6029–52. doi: 10.18632/aging.102161 (PMC6738436; doi:10.18632/aging.102161)
Supplement: Supplementary Table 2 [file aging-11-102161-s002.xls]

logFC	AveExpr	t	P.Value	adj.P.Val	B
UMOD	-7.83201541921281	9.13180712788406	-46.9322653077403	6.36598646934064e-45	7.34835889785574e-41	90.229472330435
CALB1	-8.39691097850599	8.02151195993854	-46.7844139218195	7.49832540597525e-45	7.34835889785574e-41	90.085073229185
NPHS2	-6.70684828144355	8.83565441055183	-46.0626337848762	1.679411254955e-44	1.09721535323727e-40	89.3721238698145
HEPACAM2	-5.13905869364802	5.72965146980399	-33.883229395779	1.19339730378726e-37	5.84764678855759e-34	74.9318538350619
ATP6V1G3	-5.27759612335391	7.00374723972594	-29.4929215982278	1.31485135885282e-34	5.15421732670307e-31	68.2844837517051
SFRP1	-3.85485109373982	7.50052081596835	-28.8675981238472	3.8435378775816e-34	1.25555570667666e-30	67.2567532063682
FGF1	-3.75642901043659	7.2897873648457	-28.5721704907458	6.42579875340956e-34	1.79922365095468e-30	66.7635241712748
KNG1	-5.69014042745803	7.14463500225999	-27.7460872317598	2.77316048922697e-33	6.79424319860607e-30	65.35731950337
SLC12A1	-4.0120286412051	6.41949948103162	-27.6782034900032	3.13251695059223e-33	6.82192580351198e-30	65.239955295798
RALYL	-4.62118326592464	5.95419074617747	-26.4745698774224	2.84075083354833e-32	5.56787163375473e-29	63.1115816117998
FXYD4	-5.51095271105897	7.65429692519099	-26.3747417493217	3.4239846620083e-32	6.10091812503298e-29	62.9309214392404
ATP6V0D2	-4.24589129354743	7.85973449121898	-26.1266110438173	5.46083298099577e-32	8.91936053562642e-29	62.4790521139227
HK2	4.16903553679548	8.60894497137507	25.8704422566089	8.87757861738329e-32	1.33846569923625e-28	62.0082705134523
DMRT2	-3.21358208264624	5.88023022622096	-25.7381392169368	1.14285016671617e-31	1.59999023340263e-28	61.7634057145275
LPPR1	-2.75659354305997	5.40978758637292	-25.1943207653345	3.26581850542024e-31	4.26733618041578e-28	60.7443803331228
GGT6	-3.42958770916106	7.77589224286932	-25.0665629210671	4.19113958805146e-31	5.13414599536304e-28	60.502013553349
TYRP1	-4.76867984306814	5.74599446664947	-24.9344030926863	5.4312336040463e-31	6.26189286113573e-28	60.2500884312092
SLC26A7	-2.38738681063431	4.81150670247268	-24.2482494764269	2.12591550630081e-30	2.31488577352755e-27	58.9220309969039
TMEM213	-5.37338751589294	8.29548308778617	-23.6964613356802	6.52261804753874e-30	6.72859545956628e-27	57.8289260615317
ATP6V0A4	-4.88809706328655	6.50951810634271	-23.2288691569858	1.71568081182823e-29	1.68136719559166e-26	56.8844990073363
CLDN8	-6.06356728615927	6.98386982826354	-22.84766421566	3.81983375659556e-29	3.56517817282252e-26	56.1019137027831
SCNN1G	-2.9634405989188	5.9630503338789	-22.8074394173441	4.15911640091251e-29	3.70539461172206e-26	56.0186612760271
CRHBP	-4.05524871888897	6.98905757653974	-22.4385680889283	9.12869205697651e-29	7.77923323116259e-26	55.2491224295659
CWH43	-2.51005443883754	5.90477851840759	-22.2636598658112	1.33012693629336e-28	1.08627033130624e-25	54.8803438064682
SOST	-4.59933324597248	6.07125763972633	-22.1540790788178	1.68596319778067e-28	1.32179514706005e-25	54.6480122731027
PTH1R	-3.08313019011804	9.10750977945798	-21.8907728312177	2.99175325386784e-28	2.25532168368499e-25	54.085646837548
FAM3B	-4.33557003935581	7.11666739280113	-21.775738056886	3.85036638141231e-28	2.79508078058079e-25	53.8381188418482
DIO1	-6.73254418490405	7.41538563879262	-21.5941515213252	5.74673228860128e-28	4.0227126020209e-25	53.445086236529
PPAPDC1A	-3.1632272507336	7.23545508688383	-21.0400794228102	1.98337942240791e-27	1.34049091997224e-24	52.2281231479838
ERP27	-4.05892994674119	8.46112619591977	-20.8008421652541	3.41326450183286e-27	2.14760870754531e-24	51.6942555987314
CLCNKB	-3.65188429424945	8.18044572769706	-20.7893811496887	3.50362842686452e-27	2.14760870754531e-24	51.6685505542561
IGFBP3	3.38273973168822	11.619471807591	20.7890469086017	3.50629993068623e-27	2.14760870754531e-24	51.6678007318755
RP11-999E24.3	-4.43155326104917	6.86039543705012	-20.5895298312403	5.53596853644625e-27	3.28802979740444e-24	51.2184011900093
NPHS1	-3.12979520359739	7.27543710617944	-20.0376909308009	1.99389822281259e-26	1.14942368138608e-23	49.9562998162374
HS6ST2	-4.19012504700785	5.60012470184853	-19.9378497381931	2.52146632448528e-26	1.41202114171176e-23	49.7249033998682
ENO2	3.84088754006579	8.17558901686872	19.7588652662082	3.84950381771673e-26	2.09584096742355e-23	49.3077018444322
TMPRSS2	-1.6346295090906	6.50144703944778	-19.5017038816362	7.10651916770982e-26	3.76453447803007e-23	48.7028709566411
NRK	-2.43272469007949	4.95021535748818	-19.4351320251067	8.33714472615259e-26	4.30021149033134e-23	48.5452485603753
CA10	-2.38097268050366	5.33097731459411	-19.3313993957316	1.07017550540217e-25	5.37831792458527e-23	48.2987736269966
GPC5	-4.58013857462371	6.00233906739046	-19.2047594868898	1.45357337148311e-25	7.12250952026724e-23	47.9964297195286
FGF9	-3.32446495398165	5.64596774969738	-19.0547414426126	2.09326973357169e-25	1.00068504336598e-22	47.6362084354045
CLIC5	-2.01135257186682	6.73509561512461	-18.9896715379428	2.45367367502399e-25	1.14504771501119e-22	47.4792628944095
STAP1	-2.62788395757696	5.85863047181323	-18.9658398477345	2.60093260883723e-25	1.18554137519093e-22	47.4216754351542
XPNPEP2	-4.11201656626277	7.91023650704958	-18.9452033645223	2.73569014015902e-25	1.21862560788902e-22	47.3717627025288
HRG	-3.26845415466641	6.5268519375214	-18.4895822627721	8.43358578373764e-25	3.67329514136128e-22	46.2587257861508
ACPP	-3.36255306166095	5.93389847979055	-18.4659203613082	8.9463792883015e-25	3.81193552284151e-22	46.200339425383
AQP2	-3.62973005648209	7.70611025096473	-18.4508894265339	9.28847067187647e-25	3.87348989720806e-22	46.1632200336911
MUC15	-3.66455052799721	5.37928614205529	-18.3206589692463	1.28692497942244e-24	5.16313854526454e-22	45.8406271809034
PLCXD3	-2.60820189921656	5.91923661003139	-18.3123576761337	1.31402862874436e-24	5.16313854526454e-22	45.8200040936725
HILPDA	4.20740139901299	10.5052699642186	18.3114197536238	1.31712717991442e-24	5.16313854526454e-22	45.8176735384389
NDUFA4L2	5.04829703679976	9.95267389421169	18.013554882302	2.79529052284791e-24	1.07426851466312e-21	45.0728524805211
KCNJ1	-5.80640830912568	7.52342812498811	-17.8836961776091	3.89160531202689e-24	1.46683584837937e-21	44.7451890914158
MIR210HG	2.55839410242426	7.2879282005853	17.8435587823804	4.31218357164171e-24	1.59469430196561e-21	44.6435479481256
TCEAL2	-3.4983834107549	5.83918539837777	-17.8042775480309	4.76853485125839e-24	1.7308015386049e-21	44.54390723049
SERPINA5	-3.99501813453893	8.68296181191225	-17.7483931370692	5.50374021912683e-24	1.93003925987176e-21	44.4018643852735
TMEM52B	-6.03318772240362	7.57020962030149	-17.7476400198426	5.51439788534789e-24	1.93003925987176e-21	44.3999478656066
KLK6	-2.37648151844237	7.1041540327606	-17.7357087780384	5.68606632946688e-24	1.95520877293949e-21	44.3695772694222
SLC4A9	-2.04227974038885	6.04636578366641	-17.5759264458213	8.58480772280192e-24	2.90107295460203e-21	43.9613689272676
ATP6V1C2	-2.54177818917982	6.30702633404641	-17.5005253500067	1.04367509118903e-23	3.44170611097868e-21	43.7677700805378
SAP30	1.54979258445319	7.35875573549075	17.4968838774422	1.05358350336082e-23	3.44170611097868e-21	43.7584045389061
FUT11	1.86449913409463	8.36207775252184	17.4902961585044	1.07175206152693e-23	3.4436623616275e-21	43.7414578231265
SLC5A2	-2.46844271460976	8.24347379654547	-17.3993861122833	1.35758510472442e-23	4.29172065364493e-21	43.5071078432254
ACSF2	-3.13586370872818	8.68045817320311	-17.1964300828576	2.30865306842201e-23	7.18247621286848e-21	42.9806314366108
TCF21	-2.97896270209216	6.99986899857089	-16.9685943118815	4.21215219868886e-23	1.28997161084846e-20	42.3841475944108
CCDC181	-1.5997004447144	4.68806481380469	-16.9438427621979	4.49801789262947e-23	1.35632539531596e-20	42.3189958052192
SPAG4	3.71123365801562	8.59401840839413	16.9355467833158	4.59817757017444e-23	1.36551939962756e-20	42.2971434039757
PDK1	1.73362491157904	7.2197207578514	16.7720451795231	7.10812240738038e-23	2.0793910326068e-20	41.8648739979473
KCNJ10	-2.38099429982532	6.17572459141308	-16.7001385249217	8.61693697797853e-23	2.48370536424087e-20	41.6738028711001
CAV1	2.78965871651325	10.6011392257247	16.6428505879983	1.00492234979727e-22	2.81635215042815e-20	41.5211537212755
ENPP6	-4.84910198360015	5.89814191369297	-16.640734116185	1.01065436868425e-22	2.81635215042815e-20	41.5155069785671
TNNC1	-2.34648201583913	6.50560499788115	-16.6372330671947	1.02020919734897e-22	2.81635215042815e-20	41.5061650587375
ANGPTL4	3.77329769426658	10.2472160597504	16.5533615534639	1.27868637760944e-22	3.48086847238125e-20	41.2819481018057
HPD	-5.31675470921474	8.20491442093701	-16.4457104675637	1.71057939850161e-22	4.59278852200431e-20	40.9929721358974
TFAP2B	-2.450774926686	5.62873125352009	-16.4199367020429	1.83435861427894e-22	4.85857146484692e-20	40.9235867559131
SLC34A1	-3.1836492882013	7.01790655443897	-16.0119567096747	5.59876396248741e-22	1.46314364886338e-19	39.8149376787194
RASL11B	-1.4962679300301	6.59277745070413	-15.980962746291	6.09878441781624e-22	1.57284440248945e-19	39.7299141461925
DACH1	-2.87433677002892	6.93798008855756	-15.9625033534226	6.41789293896183e-22	1.6336454753721e-19	39.6792217182493
CLDN16	-2.30684357529763	7.68020603777756	-15.9425187619527	6.78251645455523e-22	1.7043246475549e-19	39.6242952792554
FAM151A	-4.62061596383657	8.74208054689804	-15.933470930074	6.95444447018121e-22	1.72540647614622e-19	39.5994122680169
C1orf168	-2.02358647853829	5.9693914973777	-15.7196511848078	1.26001082025286e-21	3.0870265096195e-19	39.0085334352934
SLC13A3	-2.48257831988363	6.99425542040193	-15.7005224564158	1.32916058281207e-21	3.21624042260699e-19	38.9554057274813
ALDOA	1.02989431250481	12.1286910846215	15.6934089435697	1.35584756938771e-21	3.24080638536574e-19	38.9356376061887
GPD1L	-1.87210847190745	9.49712116711726	-15.6865761831546	1.38199333067324e-21	3.26350232303561e-19	38.9166439587024
NOL3	2.15375889515502	8.34482947766822	15.6608212194518	1.48523128789379e-21	3.46553967175217e-19	38.8450000895082
PACRG	-2.02509267558146	6.67736155183006	-15.6460467685114	1.54795315580027e-21	3.56939786513944e-19	38.8038652435501
ATP6V1B1	-2.03093907696766	6.84449230013743	-15.6276016510235	1.63004681740381e-21	3.71499042105985e-19	38.7524736833617
CRYAA	-3.52827883442373	7.72267527103646	-15.4030540491727	3.06757407065864e-21	6.91085652700107e-19	38.1235441930915
SLIT2	-2.80421951331203	7.44743175632027	-15.3528168977721	3.5365649794965e-21	7.87689472706038e-19	37.9819983153293
ANGPTL1	-1.89633926065214	4.91624486369851	-15.3228778859005	3.85003944314244e-21	8.47873854894291e-19	37.897497177365
SOSTDC1	-3.84985549540557	7.31971264661985	-15.3107332145412	3.98510722179751e-21	8.67867794969235e-19	37.8631883366939
PTPRO	-2.28117449171604	8.91597305749655	-15.2213493873294	5.13910274652917e-21	1.10688366848321e-18	37.6101228472279
FLJ22763	-3.9625828023759	7.03664005631453	-15.1651349247124	6.03337191037451e-21	1.28537053742761e-18	37.4504654242374
FABP1	-4.08478111717652	7.57515716491214	-15.1269542022921	6.72937903057749e-21	1.41823472042278e-18	37.3418049768556
SLC22A8	-4.20820545034283	7.98988792214914	-15.1131454417375	7.0007098007665e-21	1.45972246909599e-18	37.3024617345916
EGLN3	3.78046241735608	9.51443827058209	15.0801083636248	7.69580466172888e-21	1.58776601441985e-18	37.2082387333081
KLK7	-1.68940079512707	6.69742706101244	-15.0568058488483	8.22784774963764e-21	1.67985224888435e-18	37.1416980877434
CNTN1	-1.47715461571116	5.0121363759589	-15.0257847175433	8.99453697579126e-21	1.81745283222174e-18	37.0530127477249
SLC2A12	-1.57710247544895	5.94477283885466	-15.003551202575	9.58829660208169e-21	1.91765932041634e-18	36.9893768438605
SLC13A2	-2.4360063187107	6.73915193319221	-14.9667844886845	1.06587944769249e-20	2.11022597724979e-18	36.8840103030438
SLC7A8	-2.28232141321428	7.74888382013686	-14.8540802331227	1.47589102918076e-20	2.86410536355871e-18	36.5599757691139
SMIM5	-2.16696604132515	7.2272147782888	-14.8495338148217	1.49544375734495e-20	2.87359780823147e-18	36.5468712811906
ANGPT2	3.3647783897341	7.26872127193002	14.841292163365	1.53156106778527e-20	2.914426886271e-18	36.5231091782595
COL4A6	-1.09392824365689	5.14448666914666	-14.8261071334753	1.60044037043033e-20	3.01621454427255e-18	36.4793059580454
ALDOB	-3.87667604028049	7.81778417557862	-14.8124126944823	1.66525088707725e-20	3.1084683225442e-18	36.4397778962388
S100A2	-4.28452144205738	9.34922597658075	-14.6561670934464	2.62349293453488e-20	4.85098693555506e-18	35.9871269731922
FABP5	2.86863265136266	9.0963283688341	14.6318372386433	2.81665900030947e-20	5.15948751458556e-18	35.9163671163293
TUBAL3	-3.02933941482567	6.19305483932666	-14.6194497116078	2.9204905489944e-20	5.30014951484169e-18	35.8803112396114
FOXI1	-2.55598539248209	6.07980417086562	-14.5927029939998	3.15812235843744e-20	5.67882552526364e-18	35.8023948933014
CAV2	1.53111340051223	9.77362360366565	14.5869247913107	3.21198343895005e-20	5.7231704912201e-18	35.7855504947625
HMX2	-2.0027525431262	6.264052583462	-14.5248748674614	3.8525941304329e-20	6.80277882490854e-18	35.6044000768172
TNFAIP6	5.00109515205889	8.67962957390119	14.4945485101888	4.21142001996299e-20	7.36998503493523e-18	35.5156879198925
SCN2A	-1.93470205711594	4.94074192326606	-14.2907739533361	7.68381653351834e-20	1.33276817749522e-17	34.9165811846031
DDB2	1.85260504889167	8.33645303330648	14.2710094241741	8.14750647244599e-20	1.38861849443427e-17	34.8581924800427
CDCA2	3.34076144142416	7.14736059883943	14.2345522949101	9.07862379936607e-20	1.53397436609978e-17	34.7503599195595
ERBB4	-1.50219678404919	5.73246448244437	-14.2022467039143	9.99363625193256e-20	1.67414761143486e-17	34.6546653953639
ASS1	-2.64224799849384	12.0668320699453	-14.0860401045863	1.41319118501973e-19	2.34733451071074e-17	34.3093419494782
UQCRC1	-1.05447254312623	11.5211975273563	-14.0759034711248	1.45667134954329e-19	2.39922339924777e-17	34.2791378125079
DUSP9	-2.76380757645913	7.56576561695812	-14.0551513748569	1.5499651093973e-19	2.53160967868225e-17	34.2172617808889
RAB25	-3.50259465855479	7.15897425315296	-13.9459849010839	2.15046006736903e-19	3.40342259216897e-17	33.8908545618457
PFKFB2	-1.29061685744548	6.94310512677101	-13.9455635746834	2.15318572157629e-19	3.40342259216897e-17	33.8895918378751
FAM57A	2.13964720814735	8.0952923392716	13.8985576204691	2.48036667604175e-19	3.88921494803347e-17	33.7485708861498
SOWAHA	-2.82047297262816	6.9615503055238	-13.8937457004714	2.51658502345997e-19	3.91468781427106e-17	33.7341187939117
REEP6	-2.50233314249001	7.67131799804162	-13.8817799647956	2.60899084006047e-19	4.02647405237679e-17	33.6981680712005
DPEP1	-3.78218120173978	9.08123537268597	-13.8125890983845	3.21502016075076e-19	4.90868168009748e-17	33.4899248593111
SLC26A4	-3.61334078401863	6.95330340320165	-13.8109783792907	3.2307139629213e-19	4.90868168009748e-17	33.4850697504737
C7	-3.32125571056788	7.66050045388101	-13.7986000692771	3.35394123208045e-19	5.05671139605975e-17	33.4477472855408
SLC47A2	-3.781400238945	7.98629766851896	-13.7901703837044	3.44057705197018e-19	5.14773360447447e-17	33.4223192168991
SH3GL2	-4.22773242973623	6.37170661342758	-13.7100404469217	4.3864046759447e-19	6.49694058570487e-17	33.1801504709945
DARS	1.01634055318194	11.3984750303818	13.7083751781436	4.40863825458544e-19	6.49694058570487e-17	33.175108906014
BMPR1B	-1.99134164918318	5.75539301442188	-13.6938092284208	4.60804937290352e-19	6.7401319185753e-17	33.1309955440413
PFKP	1.01008036996101	8.62228246156708	13.6867002845159	4.70866858926844e-19	6.83628921108603e-17	33.1094559690143
SLC4A1	-2.56315584180498	6.96695362717688	-13.6650122268542	5.02961700543191e-19	7.24856568429893e-17	33.0437024068013
SLC15A4	1.14061303937464	8.05698476390219	13.5480583399309	7.18464103836309e-19	1.02042727791244e-16	32.6880744784769
PLA2R1	-1.64227509944871	5.50851606849638	-13.5309359183288	7.57079763269375e-19	1.06753693237984e-16	32.6358607707977
PLCL1	-2.63866585276343	7.35164059958762	-13.5232972273086	7.74979339973261e-19	1.08497107596257e-16	32.6125548217326
EFHD1	-2.91931238085859	9.82691589558502	-13.4989223257592	8.35016793657049e-19	1.16073256423249e-16	32.538135437765
SCN7A	-1.2332447239202	4.17101812376638	-13.4565456829467	9.50846734445872e-19	1.31243633768585e-16	32.4085711703336
PRDX4	1.34923742250198	11.602597380686	13.4357337605677	1.01356901252454e-18	1.38922745772595e-16	32.3448545011072
MPP7	-1.35447582911459	5.83471990499906	-13.4169951305369	1.07362550392704e-18	1.46132360256736e-16	32.2874371853181
CXCR4	2.64099183942511	10.2901565343208	13.3971128351248	1.14129859786724e-18	1.54272086332399e-16	32.2264656643505
NR0B2	-1.87216551935505	7.98595876213378	-13.3551292209742	1.29875347633543e-18	1.74353206412154e-16	32.0975488996444
HPGD	-3.48210637123189	8.29478588583989	-13.3506006116176	1.31700307975526e-18	1.75600410634035e-16	32.0836294536131
TMEM30B	-1.89409557805696	6.54085144637274	-13.3454128498276	1.33822861400848e-18	1.77224870503826e-16	32.0676807128335
SLC12A3	-2.9616606167107	7.09237159557651	-13.3197509572643	1.44843551402244e-18	1.90532456878119e-16	31.9887368341264
RHCG	-3.1428587235846	8.27190693296506	-13.2920674699588	1.57767073781161e-18	2.06148976407384e-16	31.9034778087864
DCXR	-2.25150335577941	10.4695783754289	-13.2277228217408	1.92509285588692e-18	2.49879602485984e-16	31.7049249328813
MTTP	-3.30885582519655	5.88753764831171	-13.2182384297524	1.98249285235741e-18	2.55637236225034e-16	31.6756126491596
NTNG1	-1.5315522914936	5.38856043217069	-13.2096175604608	2.03617055354069e-18	2.60842763721552e-16	31.6489589798454
VEGFA	2.05921858137279	10.500705573813	13.1075603347312	2.79564904722042e-18	3.55809878737145e-16	31.3326858223698
MAN1C1	-2.7104463719626	7.85426917529542	-13.1005864982694	2.85700502705859e-18	3.61272893744183e-16	31.311024443116
FOLR3	-1.7787271657362	7.0267052435212	-13.0687608050155	3.15480411547543e-18	3.96372824764862e-16	31.212090292894
PYGL	2.12282229527561	8.94327229470205	13.0441008231759	3.40703833644556e-18	4.22645261989449e-16	31.1353406976762
SCNN1A	-1.49089562838486	7.79345792665235	-13.0117747929207	3.76892381508596e-18	4.64596897960282e-16	31.034611630211
GATA3	-2.97828055830361	7.25725982424084	-13.0009112411819	3.89909200912221e-18	4.77638771117471e-16	31.0007297598102
ALB	-3.59673076002595	5.8640171682374	-12.993623225321	3.98896179434573e-18	4.84583714319394e-16	30.97799083206
PIK3C2G	-1.92865786991519	5.47347100521033	-12.9923215312085	4.00523274080316e-18	4.84583714319394e-16	30.9739287589041
ARHGEF26	-1.10446574167398	4.68523622619924	-12.971010398255	4.28138852185359e-18	5.14817270112456e-16	30.9073936358225
GPC3	-1.23363268213956	6.40039943913848	-12.9181783001802	5.05219679177712e-18	6.03799128773364e-16	30.7421913843147
BSND	-1.05231467218944	6.50976597790699	-12.8644136831893	5.98142337972321e-18	7.10520595409545e-16	30.5736984382108
PRR15	-2.15231865742681	6.86417355439418	-12.8555679722782	6.15012267453681e-18	7.26159062776635e-16	30.5459406358859
PRELID2	1.64142072658437	7.3382380889765	12.8431266298964	6.39558686481878e-18	7.50619775751186e-16	30.5068824313998
COL23A1	3.28887466819419	7.94726373598125	12.8277103883469	6.71356398459951e-18	7.8324913153661e-16	30.4584567652964
RNF149	1.09889201206482	10.5123371747329	12.7091663448479	9.75969337654851e-18	1.13189343301983e-15	30.0850456823237
CYP4F2	-3.19980272730546	7.79146054333223	-12.6619409058568	1.13340353367581e-17	1.29910580468104e-15	29.9357741702789
IFI16	1.83627604090195	9.52806667746658	12.6467009351786	1.18951642956384e-17	1.34767523643359e-15	29.8875409140144
IRX1	-3.03678208400074	5.79197128337271	-12.6466974249623	1.18952967297455e-17	1.34767523643359e-15	29.8875298009648
TFCP2L1	-2.61620194666379	7.72205489859174	-12.6395895402529	1.21665510799513e-17	1.37048506417842e-15	29.8650235264871
IYD	-3.52270700560436	4.91414917800936	-12.6248481886379	1.27492595421903e-17	1.42791706872531e-15	29.8183256967907
PRRG2	-1.03379544656201	7.13315748401849	-12.6078860225344	1.34548338564898e-17	1.49837922492727e-15	29.7645575371931
VIM	1.57711259014428	9.61194597052148	12.5846594063732	1.44856312638156e-17	1.60405860322477e-15	29.6908706622483
TSPAN8	-4.60873802827077	7.66377793657474	-12.5729022481638	1.50375477593905e-17	1.65581986564075e-15	29.6535439293613
NXPH2	-1.09015908399264	5.12083371870137	-12.5604746530659	1.56441171053884e-17	1.7129871243889e-15	29.6140690102964
MPP5	-1.25975831133825	8.79450308763179	-12.5330444518788	1.70721486392728e-17	1.85896729627637e-15	29.5268683516634
TYROBP	2.1483265932723	10.3371340128808	12.5194867701931	1.78260273132072e-17	1.93033223944122e-15	29.4837320788293
SERTAD2	1.17954480310161	9.57791150940005	12.5094512985159	1.84056928881512e-17	1.98215154180089e-15	29.4517868696361
CNTN3	-4.40542447493361	6.58779897518931	-12.4768211744902	2.04257903911719e-17	2.17936723474192e-15	29.3478265680619
HYKK	-1.60483172765461	6.92295582173316	-12.4763068887134	2.0459365877169e-17	2.17936723474192e-15	29.3461869264112
DDN	-1.60924149270694	6.73169068219551	-12.473055941742	2.06729032310997e-17	2.19021028826786e-15	29.3358214830621
SUCNR1	-3.37733946874282	8.2460607779869	-12.4399013623734	2.29838656914312e-17	2.42195573952716e-15	29.2300311610699
PCDH9	-1.49657888910222	5.11723653895804	-12.4129517175531	2.50539939635184e-17	2.62598011596235e-15	29.1439336724671
AGPAT9	-3.73569275531892	8.72948228663293	-12.3250629279132	3.32127470631918e-17	3.46260554488595e-15	28.8624902949235
ENTPD1	1.89156925270035	7.11463878855605	12.3193182084728	3.38315704490221e-17	3.50845915767637e-15	28.8440589886695
P2RX7	1.90055869700968	6.61331694478934	12.3070199903465	3.51958794858006e-17	3.63073283116679e-15	28.8045869875485
RP11-728F11.4	-1.50867781121739	6.91023372987549	-12.2148892510953	4.73571531724703e-17	4.85968692241056e-15	28.5082580157294
TMEM91	1.69556415809202	8.4318400879112	12.1959229687828	5.03476193096378e-17	5.13965280452553e-15	28.4471172738864
TMEM207	-2.71442205497893	6.66254325942099	-12.1861638249946	5.19601563779031e-17	5.26379252929704e-15	28.4156388597106
PLG	-2.99629660339828	6.89294479289862	-12.1853272081827	5.21008036063075e-17	5.26379252929704e-15	28.4129397480278
TMEM45B	-2.18304280615577	7.36140989857215	-12.177963198107	5.3355546099561e-17	5.36291642846869e-15	28.3891778730028
IGSF11	-2.84765729083718	5.89991719845375	-12.1683629675906	5.50373776333804e-17	5.50373776333804e-15	28.3581896249378
SHISA2	-2.97312544059313	6.44456768694472	-12.1624990858381	5.60909526653944e-17	5.58062270173467e-15	28.3392558871284
AFM	-4.52338285113411	6.69888992088735	-12.156848948243	5.71254378496371e-17	5.65484132248932e-15	28.3210080562427
ABAT	-2.76082896987735	8.65242666078209	-12.1516161717221	5.81007306832293e-17	5.72248402709193e-15	28.304104428875
VDR	-1.32543594555561	7.71068588371035	-12.1372583807243	6.08642336286098e-17	5.96469489560376e-15	28.2577055820312
CLNK	-1.29403302662739	4.9229852826162	-12.1150726318773	6.53985254336673e-17	6.37716964427801e-15	28.1859568974292
BHLHE41	1.69129892079183	6.45087775062419	12.110409450304	6.63942615537398e-17	6.44221547749158e-15	28.1708680072004
GJC1	1.83413263204113	6.46309903224951	12.0940176622191	7.00178357336996e-17	6.76034276049514e-15	28.1178057701105
DIAPH2	1.17892530317063	6.54647878693835	12.0822147902698	7.27503934052103e-17	6.98974368010844e-15	28.0795767218754
PAG1	1.92599395932271	7.72434003562104	12.0685491111699	7.60494128302091e-17	7.27106581205901e-15	28.0352914248297
LPCAT1	2.29038695857913	9.91711031326914	12.049635823132	8.08666817829766e-17	7.67741880091811e-15	27.9739604554858
SEMA5B	2.07230442711517	9.44914292746115	12.0488137181783	8.10829434586759e-17	7.67741880091811e-15	27.9712935216361
RNF212B	-3.47102766912011	7.12128572619218	-12.0455265457467	8.19535282382229e-17	7.72254400706331e-15	27.9606289527605
SYNE4	-1.34912541186688	5.85450412073933	-12.0257864119531	8.73842928414913e-17	8.19489062054177e-15	27.8965564546162
SAT2	-1.4685900917319	10.7964021198036	-12.0226407676506	8.82827525701427e-17	8.23972357321331e-15	27.8863416381497
SGPP1	-1.24066178237186	9.40931596091505	-12.0197614899902	8.91133271332103e-17	8.27782564839299e-15	27.8769906615399
NETO2	3.34836804223991	8.20475656637917	12.0090690159067	9.22675817804162e-17	8.53039907026489e-15	27.8422554632414
ZC3HAV1L	1.19895009971748	6.47540310642025	11.9917675980417	9.76127059787556e-17	8.98220205250521e-15	27.7860191513081
GATA3-AS1	-1.16026515594209	5.1899632288775	-11.9713206230265	1.04335394246046e-16	9.55595199636682e-15	27.7195083303212
ERO1L	1.6744249259555	9.09816413776182	11.9680061001671	1.05468495039962e-16	9.61480233852672e-15	27.708721580417
PAPPA	-1.52754831416443	6.13605807221605	-11.9501599138745	1.1178698151331e-16	1.00968886528151e-14	27.6506185692441
GPR110	-2.10688987432812	5.80757558423956	-11.94220773465	1.14724579368662e-16	1.03146869524118e-14	27.6247147919636
SLC30A2	-1.69025766465882	7.10349072163556	-11.9205928013685	1.2311033949318e-16	1.10180943108052e-14	27.5542638168324
CA9	3.90977828872907	8.65541869057241	11.898104497014	1.32494608809724e-16	1.18040651485027e-14	27.4809017593465
PPP1R3B	1.33469965544608	7.4635172550134	11.8916824977062	1.35305091203392e-16	1.19999085411153e-14	27.4599396507587
LIN52	-1.21996933987596	8.2336001240706	-11.8818463753699	1.39727157536639e-16	1.23362715662978e-14	27.427823086974
GLRX5	-1.12545675215564	10.8256712696411	-11.8776062435299	1.41678259665558e-16	1.24524389661208e-14	27.41397448136
PLOD2	2.20838273255852	10.6780277291447	11.8401784230434	1.60142483643225e-16	1.39501896862543e-14	27.2916310555532
MRAP2	-1.65922969224826	6.2568024812731	-11.8372677331411	1.61676669276162e-16	1.4021516450499e-14	27.282109025012
MAL	-4.34633945970344	9.83904122508893	-11.8236230593633	1.69069308751459e-16	1.45590253401386e-14	27.2374571940942
PHYHD1	-1.97398897877228	7.58592513953369	-11.8230987774286	1.69360090691409e-16	1.45590253401386e-14	27.2357410138517
ECHS1	-1.43519460547705	12.0311281002342	-11.8038343630072	1.80403120025429e-16	1.53734832717322e-14	27.1726563282793
LRRC2	-2.46912225176354	5.34038792775837	-11.7740053969561	1.98958245501504e-16	1.68085414302994e-14	27.0748813082603
NINL	-1.20273685804657	8.54231615879336	-11.7705892965256	2.01202965393486e-16	1.69252279901816e-14	27.0636764734142
TMEM178A	-3.85617864720148	8.37733136715236	-11.7589073386845	2.09074676818956e-16	1.75122378873997e-14	27.0253481492899
SLC15A2	-1.43477848874431	5.56398301511222	-11.7512996594924	2.14367852783724e-16	1.78034318413601e-14	27.0003779748997
C16orf89	-2.7507748245089	7.49158353793434	-11.738104165467	2.2387254952462e-16	1.84365629020275e-14	26.9570495339871
DAO	-3.23166117017268	8.18752716443102	-11.7059739630926	2.488389993911e-16	2.03218516169398e-14	26.8514533356458
ANO5	-1.86203759266912	5.98848462797952	-11.6619315405917	2.87708792581801e-16	2.33987233800966e-14	26.7064908220811
PNP	-1.55475567833514	10.260135037146	-11.6385534537248	3.10782269893873e-16	2.51707954128922e-14	26.6294418069163
ST8SIA4	2.54316221134236	6.2115178193169	11.6358124855191	3.13607397279785e-16	2.52950822497275e-14	26.6204035649514
ESRRG	-3.06169802511583	8.29943118054337	-11.6301481567392	3.19528252935862e-16	2.56670235964873e-14	26.6017225804765
NPTX2	5.0931093366514	7.74317538050815	11.6254638943713	3.24510015873754e-16	2.59608012699003e-14	26.5862707362098
IRX2	-1.33834174004109	6.68242552235902	-11.608984672536	3.4266886042698e-16	2.73020718063773e-14	26.5318887251914
EPN3	-1.12004403273305	5.66938557977649	-11.5992641102626	3.5385882429149e-16	2.80794856522802e-14	26.4997941283972
INHBB	2.6728100890683	8.745722164127	11.565426360777	3.95776735312135e-16	3.12791290811204e-14	26.3879764349754
PHKA2	1.53985482442267	7.98214281670967	11.5310924469292	4.43453640467183e-16	3.47667654126272e-14	26.2743686887482
DANCR	-1.75297341377622	10.1607769158619	-11.5235146247712	4.54736289660615e-16	3.5509287957562e-14	26.2492739789154
CTXN3	-4.67674323354855	7.28140087497752	-11.513594394266	4.69946764069519e-16	3.65514149831848e-14	26.2164110110621
SLC1A4	1.01691830121781	6.89290590630216	11.5018354853322	4.88644690632625e-16	3.7855478009484e-14	26.1774406582161
RFC2	1.02013434021749	8.07495786178262	11.4795861214925	5.26108479875882e-16	4.0597347266013e-14	26.1036552392391
EGF	-3.86808376059601	8.18866607953223	-11.4665923978701	5.49318271816216e-16	4.22221103043053e-14	26.0605348975272
C5	-1.74103112969542	7.36661617563617	-11.457837062312	5.65538848403263e-16	4.32990680808749e-14	26.0314676718808
LAPTM5	2.21734706627261	10.6608823245443	11.4367121995614	6.0669969118249e-16	4.62697040746179e-14	25.9612939121266
SLC4A11	-1.00363835002117	6.86788624732606	-11.4067012436279	6.70443065101393e-16	5.09328840154547e-14	25.8615037063545
ALDH6A1	-2.93349442154753	9.12920140610369	-11.3630281163198	7.75515839231137e-16	5.8687685131005e-14	25.7160796036914
CDCA7L	2.21409136962065	7.91453547436235	11.347876942983	8.15737931446984e-16	6.1492836587838e-14	25.6655719430773
PDP2	-1.28833927994629	7.36604643061711	-11.3463280749495	8.19966831450915e-16	6.1492836587838e-14	25.6604070187528
ACSS2	-1.08595165095744	9.02921715363469	-11.3455877124424	8.21996080919059e-16	6.1492836587838e-14	25.6579380650384
STC2	2.07948056705549	8.03803930054299	11.3393026457424	8.39428608413949e-16	6.24859346559841e-14	25.6369758741728
EMX1	-1.59681144379308	6.45443632961899	-11.338512217272	8.41647283121419e-16	6.24859346559841e-14	25.6343392513711
PAK6	-1.37525556595367	6.54669499635581	-11.3347189773066	8.52377437376535e-16	6.30437651795475e-14	25.6216850794776
HSD11B2	-3.54373460980402	8.83185269732541	-11.3111677057326	9.2216588136062e-16	6.76945740624276e-14	25.5430775420754
ITGB2	1.49300250495802	8.28867153148614	11.3090931643965	9.28583666497262e-16	6.79113427736804e-14	25.5361499245949
PTGDS	-2.93649588041216	9.58011305393641	-11.2905313832009	9.88054907710458e-16	7.19921047997211e-14	25.4741413203464
SMCO3	-2.41796434698557	6.06778796391105	-11.2714299763336	1.05328193034475e-15	7.64604660546557e-14	25.4102843285246
MFSD4	-1.84547135186364	7.42675746999639	-11.266244003336	1.07173103268663e-15	7.75126503345313e-14	25.3929393605666
VWF	1.66484273488517	8.45421281278383	11.2362949193902	1.18485453873996e-15	8.53792241150852e-14	25.2927051678063
ACAA1	-1.68758797681898	10.3693385237394	-11.2294863343237	1.21221354782694e-15	8.70307162542418e-14	25.2699022069302
CDKN1C	-2.28942569372976	9.03319642479404	-11.196451023164	1.3543110350797e-15	9.61757111868191e-14	25.1591787854057
MPPED2	-1.9403897585783	6.0453701310792	-11.1761078551109	1.45008111945465e-15	1.02605017838668e-13	25.0909266083209
HOXB-AS3	-1.52589995435524	6.13266219103384	-11.1592458818274	1.53463608469929e-15	1.08197364244986e-13	25.0343143968335
EPB41L5	-1.35639612123545	7.30564054131284	-11.1555258923923	1.55395162093453e-15	1.08776613465417e-13	25.0218201158644
CRNDE	2.07218542490439	9.05399734046322	11.150597640895	1.57992001248199e-15	1.09954903055046e-13	25.0052649745474
ANGPTL3	-2.6707461520964	5.58438326939552	-11.1494094557163	1.58624628345894e-15	1.09954903055046e-13	25.0012731266743
IL10RB	1.08123504695767	8.99991080362661	11.1272361819491	1.70911792077948e-15	1.17953208617176e-13	24.926746785207
ERICH4	-3.06098135434075	7.79156613877007	-11.0910468539027	1.9306891612278e-15	1.32777219509e-13	24.8049783968588
ACKR3	1.29852727194767	7.50078648049636	11.0805938286035	1.9999403830391e-15	1.3668152822784e-13	24.7697758580289
P4HB	1.12485548809659	11.0815328032109	11.0803762684839	2.00140809190766e-15	1.3668152822784e-13	24.7690430375345
ADH6	-2.79164166262969	7.612660249517	-11.0735834955405	2.04778560001951e-15	1.39363186667994e-13	24.7461595557674
FCER1G	2.40612898680561	9.32719702609934	11.0702986247757	2.07060125280973e-15	1.40428320259761e-13	24.7350914129432
PPFIA4	1.64016578461846	6.48754736846453	11.0583950420764	2.15545454818175e-15	1.45678997049525e-13	24.6949717896713
FCAMR	-4.12271963727862	7.91829248173528	-11.0404063449926	2.29040570176172e-15	1.54251111229317e-13	24.6343093261047
PARM1	-1.7272441725037	8.90633957999246	-11.0218518785895	2.4385621667068e-15	1.63125660298475e-13	24.5716965223429
FAM169A	-1.92765083115005	6.00216364128284	-11.0159102738664	2.4880250793961e-15	1.65868338626407e-13	24.5516372372568
KIAA1715	1.17509257985195	7.9975598350687	10.9968478990606	2.65366979105652e-15	1.76311620015958e-13	24.4872515248133
OXGR1	-1.07966488425242	4.82989497710528	-10.9943320955221	2.67634858929076e-15	1.77217676858442e-13	24.4787506751616
SLFN13	2.03958021664639	5.9634973175335	10.983505438695	2.77620352049191e-15	1.83210737379264e-13	24.4421586110964
RASSF10	-2.61574553444369	6.01923164993751	-10.9808422631662	2.80133808239683e-15	1.84249081929456e-13	24.4331553391793
ADH1B	-2.35438991689736	5.77787724040577	-10.9772288888839	2.83580866666694e-15	1.85892474470475e-13	24.4209383619725
DPP6	-1.34641462524852	6.37224101995067	-10.9733913665181	2.87288723574606e-15	1.87146015766563e-13	24.4079617490248
ZNF395	1.66408907379906	8.33500373359137	10.9732740859402	2.87402809927221e-15	1.87146015766563e-13	24.4075651349122
CYP17A1	-1.78464400771071	5.25514356296733	-10.9616464412406	2.98944165963812e-15	1.93376424187812e-13	24.368234793245
SLC51B	-2.45238210716308	7.17757868228785	-10.9555672727286	3.05163600613625e-15	1.96750216185101e-13	24.3476653936444
FTCD	-1.86997286606694	7.86251926686376	-10.953074829202	3.07751210518945e-15	1.9776799102201e-13	24.3392306634997
MRGPRF	-1.89931311304666	7.07920384022901	-10.9405452393616	3.21099157896766e-15	2.05671356038452e-13	24.2968173147705
ERVMER34-1	-1.69785809719134	6.2390922856746	-10.9263964492888	3.36877236217338e-15	2.1507471758501e-13	24.2488994326049
RHBG	-1.20017488935402	7.92241469617353	-10.9222583660662	3.41638310560379e-15	2.17406197629332e-13	24.2348802370614
MYL3	-1.05116930708814	7.61130140518166	-10.9099224282859	3.56238943667149e-15	2.25963860707965e-13	24.1930753521115
UPP2	-3.89379193591939	6.7805598713311	-10.8982258296424	3.70665217609061e-15	2.34356073068955e-13	24.1534196782138
LAMA4	1.03143483539763	6.22935573373707	10.8952520716563	3.74426207866983e-15	2.35972786951539e-13	24.1433348670434
LZTS3	-1.29493039004329	8.71578217334422	-10.8842852490143	3.88632797800448e-15	2.44141116566948e-13	24.1061339641179
RPS6KA6	-1.06698291583406	5.28091757754003	-10.8653366120885	4.14475616731523e-15	2.59543836675331e-13	24.041822634191
RP11-61L19.2	-2.3658876250401	6.32720475931971	-10.8564070872352	4.27249507414076e-15	2.66313754911966e-13	24.011500605513
PRLR	-1.56614359288354	5.55637253932739	-10.8558879634547	4.2800424896566e-15	2.66313754911966e-13	24.0097375116159
INSIG2	1.3045851371099	10.1233459986014	10.8379591361375	4.54914388380089e-15	2.82162088995245e-13	23.9488256403923
IRX3	1.99406682463659	11.1183148120773	10.8305178671725	4.66579639100808e-15	2.88165623393385e-13	23.9235328356733
TMEM45A	3.59452877793103	8.74667860192924	10.8053763225083	5.08276305397539e-15	3.11319237055992e-13	23.8380265119855
PEPD	-1.99530754420926	10.4519337111308	-10.8033001227694	5.11883614218284e-15	3.12551988743874e-13	23.8309618858835
OGDHL	-2.89843571103629	9.70533575305441	-10.7874157075396	5.40352269045408e-15	3.28910076810248e-13	23.776894904728
FAM49A	1.54598094251847	6.18750648802598	10.7765770306807	5.60691256219634e-15	3.39183599441507e-13	23.7399846995748
S100A14	-1.36544350704132	7.30110658887822	-10.7630444002459	5.8717535564657e-15	3.53025673947018e-13	23.6938802342432
LY86	1.68251633542295	8.3032952488954	10.7608182235901	5.91651658205821e-15	3.54629128465874e-13	23.6862936989023
GAS1	-1.48975597634332	6.70087501883259	-10.7567828293597	5.998539634835e-15	3.58449319642579e-13	23.6725400256736
LGALS1	1.65270615491541	11.9576486888736	10.7496138578401	6.14710028642889e-15	3.65100501860625e-13	23.6481013880422
ANXA4	1.01686728839606	12.5596633583597	10.7366797439953	6.42460171247974e-15	3.80429587808468e-13	23.6039937822666
ELF5	-1.72460477264433	5.94780006304431	-10.7328276595946	6.50966993205236e-15	3.83151743748427e-13	23.5908535426756
MT1G	-1.55143366331579	8.88021024700333	-10.7108507098919	7.01724354683326e-15	4.11790339874048e-13	23.5158510521677
MCOLN3	-1.54764309138847	5.74599551118928	-10.6996888947914	7.29016491045915e-15	4.2652905147761e-13	23.4777356699618
HADH	-1.6607653209451	10.176007472821	-10.6954824830964	7.39577850805672e-15	4.31420412969975e-13	23.4633676700404
TBC1D24	-1.29738210049111	7.25109197557915	-10.679231129262	7.81854712181735e-15	4.53383205880533e-13	23.407837064617
LHX1	-1.30119167241921	7.22814643361454	-10.6766269287292	7.88852894386161e-15	4.54911322536469e-13	23.3989355675251
CEL	-2.67770976168397	6.12765406349675	-10.6746030417993	7.94335300743699e-15	4.56568090750044e-13	23.3920170885551
APOO	-1.171708450435	9.62167748088796	-10.6564170125651	8.45358885879301e-15	4.84474683135506e-13	23.3298274222737
GSTM3	-2.27034121227723	9.10653041791916	-10.6494983118324	8.65628970223821e-15	4.94645125842183e-13	23.3061574155183
EHD2	1.49282526980694	8.5216189846261	10.6391730987524	8.96796467936045e-15	5.10965429405421e-13	23.270822376979
MLKL	1.31184092761076	8.13789234161567	10.6168417828351	9.68140131884276e-15	5.48426201876642e-13	23.1943557800813
CCDC160	-1.52597267512943	5.04245415235058	-10.6086180806655	9.95834953375225e-15	5.62488907381972e-13	23.1661810906741
GDPD3	-1.88499286488994	7.55692001957497	-10.5980455625739	1.03261941600638e-14	5.81590245796697e-13	23.1299472735319
LDHD	-2.19041452508593	7.4599137621445	-10.5953055201054	1.04237473465099e-14	5.8413854186727e-13	23.1205544804677
CD300A	1.27260253958463	6.43626104990936	10.5951015776934	1.0431045390487e-14	5.8413854186727e-13	23.1198553350544
DDX26B	1.21649862718454	6.97053680966707	10.5863776138646	1.07481127973051e-14	6.00179518026156e-13	23.0899435713619
SLFN11	1.99240035535021	7.53854638534461	10.5852261987652	1.07906814499443e-14	6.00844762553716e-13	23.0859950409323
TREM2	1.60517440453889	7.98434151248246	10.5777826106655	1.1070016668055e-14	6.14652483552062e-13	23.0604650017697
GLYCTK	-1.01914177636665	7.91848137214752	-10.5761268585059	1.1133138773182e-14	6.16411073317422e-13	23.0547851909452
ADM	1.76322450863896	11.88002185911	10.555592045805	1.19468854251869e-14	6.55907435108298e-13	22.9843161598023
FABP6	1.11099174619141	5.74517610270848	10.5403448443402	1.25897524940214e-14	6.87351389645737e-13	22.9319597639738
RNASET2	1.20511896444818	7.70807059545511	10.5390618119782	1.26454177899694e-14	6.88472746342777e-13	22.9275527677669
MCM5	1.17173306722942	8.19233409720228	10.5287889473224	1.31001739946261e-14	7.11255984195767e-13	22.8922601203424
MAGI2-AS3	-1.64573656824401	6.30257293121773	-10.5266713996526	1.31959477724814e-14	7.14476730222748e-13	22.8849836672408
TSPAN33	-1.37860355271686	9.56650301854175	-10.5116658319492	1.38952054540207e-14	7.50264536911309e-13	22.8334051879184
DDIT4	2.05105873725043	11.5610672198413	10.5085584653417	1.40446236367192e-14	7.56248965054113e-13	22.8227209017374
ALDH4A1	-2.38482331546871	9.27525946750596	-10.5037764064125	1.42777470694019e-14	7.62858281918086e-13	22.8062761426523
CCBE1	-1.13265094440965	5.84158479839859	-10.5036465424052	1.4284132115507e-14	7.62858281918086e-13	22.805829522343
CFD	1.94190442656433	8.52078808277969	10.476917351785	1.5661681710857e-14	8.25185380464506e-13	22.7138612713824
COL4A4	-1.33746458770462	6.64737783785056	-10.4749874056564	1.57661940009576e-14	8.26311516644349e-13	22.7072175257312
ADH1C	-2.59026167533554	5.63684200049971	-10.4749657111555	1.57673728176013e-14	8.26311516644349e-13	22.7071428409449
TNFAIP8	1.24423339816211	8.64171957274041	10.4566989951718	1.67922161852701e-14	8.70707505902894e-13	22.6442385469399
COBLL1	-1.27899574154701	6.71192709380233	-10.4520238880101	1.70651579948783e-14	8.82525321107165e-13	22.6281327039716
HACL1	-1.09056459629832	8.72543230982837	-10.4254209457417	1.87058462034519e-14	9.59776402061929e-13	22.5364355995948
SCARB1	1.57191645598943	6.58220000061795	10.4239845979476	1.879883379576e-14	9.62029092420094e-13	22.5314822951651
SFXN2	-1.78950292940799	7.29656012468674	-10.4044297239555	2.01122476180485e-14	1.02124366143459e-12	22.4640222091304
EZH2	1.87259826926889	6.05483543902224	10.3998021581366	2.04363924531857e-14	1.03502142656961e-12	22.4480514899542
HPCAL1	1.47578103473075	10.5592747640916	10.363745185434	2.3149698249134e-14	1.16342073252058e-12	22.323524615566
GABRA2	-1.77762560162296	4.4271937971785	-10.3613887924777	2.33391961978683e-14	1.16994436183688e-12	22.3153812117744
KLHL3	-1.24160117299878	5.91435555550379	-10.3448922622154	2.47104411350865e-14	1.23552205675433e-12	22.2583529566026
HPCAL4	-1.04391871613522	6.1806009461964	-10.3363807684932	2.54494800066012e-14	1.26923615300097e-12	22.228916355513
PVALB	-4.02399151347092	7.484784024678	-10.3261534067836	2.63670982629747e-14	1.3116627562292e-12	22.1935342704244
CENPU	1.24956195355781	6.44781378492929	10.3067628918309	2.81996162959329e-14	1.39927209974756e-12	22.1264181689286
TACSTD2	-1.1182363128862	6.84534092854201	-10.2960749317634	2.9264141510386e-14	1.44477877482006e-12	22.0894053060526
TM7SF2	-1.48727127686584	8.27661916103042	-10.28839238973	3.00543131452808e-14	1.48006165238066e-12	22.0627921004063
ALDOC	2.33784221537193	8.61051549905695	10.2816386478359	3.07667350251613e-14	1.50757001623291e-12	22.0393906825539
RP11-38P22.2	1.92434687410771	6.20643220734759	10.2728988538955	3.17140340761448e-14	1.5501123887592e-12	22.0090997979282
RASSF2	2.50364029318055	8.15096326770305	10.2590169403103	3.32796144797935e-14	1.6105689970468e-12	21.9609687958878
PDHB	-1.0174721191074	10.7183745969666	-10.2349490027554	3.61812564682358e-14	1.74668134674242e-12	21.8774680765958
GSTO2	-1.6833166594542	7.0996219339891	-10.2224737710633	3.77844877338243e-14	1.81959695229227e-12	21.8341604122684
ZNF300P1	-1.49645304097328	5.51955539326519	-10.2215599272584	3.79047109278643e-14	1.82091258378956e-12	21.8309873036872
TMEM72	-2.059008718657	7.88919391489275	-10.2194974727831	3.81774641580698e-14	1.82953128972657e-12	21.8238255589564
RP1-78O14.1	-2.25271476183838	4.76763336375901	-10.214844751482	3.8800072660305e-14	1.8503197667688e-12	21.807667469669
KISS1R	4.83689568422972	7.85501288846531	10.2109709591272	3.93262630043474e-14	1.86633112563005e-12	21.794212558161
MCAM	1.85102536367681	8.99164334614003	10.1961262592611	4.14102594785133e-14	1.95576165247918e-12	21.7426361772607
NAPSA	-2.32053189774141	8.73603226755963	-10.1834963885085	4.32709225047989e-14	2.0338371249258e-12	21.6987350121192
ATP1A1	-1.30820166756683	11.6305613982856	-10.1784217530156	4.40420974930123e-14	2.06513184416996e-12	21.6810905204445
RNF150	-1.60995594873938	6.7863013628875	-10.1757686112965	4.44507951732218e-14	2.07437044141702e-12	21.6718643773458
C3AR1	1.58225930884009	8.66628519395584	10.172848725654	4.49050104109741e-14	2.09058955832563e-12	21.6617097138349
GLDC	-2.38755548503083	9.94980046138609	-10.1323155101863	5.17167173404118e-14	2.3963301651822e-12	21.5206439904021
PROZ	-1.36588281399469	7.21211895039754	-10.1204727765978	5.38973415821527e-14	2.491480884458e-12	21.4793928756413
ITGAM	1.48356811508389	7.25732012246795	10.1183592702863	5.42961570431621e-14	2.50401100716701e-12	21.4720293393306
DNASE1L3	-1.35593657795262	6.86186759898492	-10.1134315333233	5.52376232381388e-14	2.54144933208338e-12	21.4548589409173
ESRP1	-2.18969835703766	6.25648742894291	-10.0599408679738	6.65817919732275e-14	3.03810248761666e-12	21.26829659457
CYP27B1	-3.21176071738956	6.3549689402386	-10.059638257838	6.66522484528146e-14	3.03810248761666e-12	21.2672402430977
C1QB	2.50777701140507	9.77617172195748	10.0568658499609	6.73012593916683e-14	3.05772024471295e-12	21.2575618404108
GCH1	-1.739032649448	9.5037365909549	-10.0467354854277	6.97274631657817e-14	3.14898220748692e-12	21.2221896328536
FHIT	-1.44428502155602	8.09244213669101	-10.0415179192784	7.10113144953412e-14	3.19959026231882e-12	21.2039669375244
ARHGEF6	1.18445165065348	8.7392387174339	10.0337274132246	7.29728258330429e-14	3.28042978515514e-12	21.1767523753663
DUSP4	1.45147272206507	6.68177479014226	10.0237055056188	7.55768269672412e-14	3.38971580905704e-12	21.1417328262215
CD1D	1.88741161776508	6.84230633864892	10.0154713979465	7.77863597718504e-14	3.47292175746758e-12	21.112951946707
PRC1	2.12180474525661	7.03499290519607	10.0013315228365	8.17338730166703e-14	3.63261657851868e-12	21.0635107618419
PIGR	-3.09023917747296	8.63174699456268	-9.99219248733131	8.43922484772858e-14	3.74228070170769e-12	21.0315435021501
C4orf47	1.55450512719926	7.61267291426503	9.98297745239172	8.71611202097847e-14	3.85633850138099e-12	20.9993009585051
MTURN	-1.37062849599171	7.40986513030532	-9.97130139195033	9.08015768800926e-14	3.99935035247149e-12	20.9584339147785
SLC30A9	-1.06958048348367	8.90595674058943	-9.96462340868416	9.29522871381697e-14	4.0848987172828e-12	20.9350536726092
TMCC1	1.1307250897557	7.94945123184314	9.96007086174562	9.44478815143991e-14	4.14133887624658e-12	20.9191119379254
AQP6	-1.28088695998472	7.08887065766619	-9.95686479595249	9.55156845000296e-14	4.1788111968763e-12	20.9078838180127
IL15RA	1.11616057945391	8.31326732349341	9.94316526627321	1.00217413218135e-13	4.36502510905656e-12	20.8598931704378
C2orf40	-2.91939663076861	8.10406569928494	-9.94223324165764	1.00545647707639e-13	4.36961129727212e-12	20.8566274507669
HEY1	1.9493473524851	8.48250128334885	9.94082614674938	1.01043245959755e-13	4.38152128498053e-12	20.8516969506658
CMTM4	-1.07883357054035	8.28342931486235	-9.92563374516569	1.06576723793756e-13	4.61126663655104e-12	20.7984483916542
C1orf162	2.0411944709212	8.69936166125764	9.92409790229784	1.07152869574817e-13	4.6204212540064e-12	20.7930639236994
ACOX2	-2.28559185823439	8.57210763187055	-9.92381382833981	1.07259779110863e-13	4.6204212540064e-12	20.7920679683104
LDLRAD3	1.68633554872094	8.24860972224614	9.90660792037117	1.13939930324262e-13	4.87603195274136e-12	20.7317279301414
ANO1	1.31431951736744	6.47622392662829	9.90297872325474	1.1540173210287e-13	4.9278299547195e-12	20.7189963968785
CD86	1.4349448321331	6.57107351505335	9.89479270470671	1.18768846350717e-13	5.06058562711751e-12	20.6902738238788
ALDH1B1	-1.34827037392982	7.79957782229053	-9.86173921569042	1.33403921455324e-13	5.65956030416525e-12	20.5742230782384
VTCN1	-2.9580867655977	6.64922208544512	-9.85671571459253	1.3578228463015e-13	5.74801896058518e-12	20.556575106327
DOCK2	1.00736797935669	5.65630826481256	9.84854210163445	1.39743859062951e-13	5.90297335696949e-12	20.5278546458139
EBI3	1.00578951122525	6.72241128566828	9.83579915144958	1.46154074099119e-13	6.15533250253785e-12	20.4830639135296
SPINK1	-4.40122948439165	8.40472255537908	-9.83542603937981	1.46346170723604e-13	6.15533250253785e-12	20.48175217988
C1QA	2.02750471063505	10.3748290027452	9.82816525119605	1.5013551883955e-13	6.30119094058924e-12	20.4562227343459
LIPA	1.23112768344484	11.5533899921731	9.82501539446349	1.51810048004833e-13	6.35785671131351e-12	20.445145833778
HIST1H2BK	1.82343325736916	10.1799726361471	9.80637735408974	1.62111338927131e-13	6.77480222382039e-12	20.3795806057899
MS4A7	2.11112452592082	9.29650122065972	9.79560886440428	1.68381688806837e-13	7.00696624334183e-12	20.3416818868835
BSPRY	-1.27203379223281	7.24853697229535	-9.77400333881281	1.81710261500099e-13	7.52964297125146e-12	20.2656054777144
CPN2	-1.99209137677226	5.43986860747282	-9.76756724062356	1.85882873354863e-13	7.68629602901965e-12	20.2429332656719
JAG2	1.09859577750674	7.98817945713937	9.74788401242758	1.9925342071277e-13	8.18735229763165e-12	20.1735682847091
TAC1	-3.24705439246209	4.82634923061661	-9.73611095568965	2.07710243298778e-13	8.51698905576581e-12	20.13205944611
STK33	-1.08363090950821	5.58001576934597	-9.71699960257129	2.22216426673925e-13	9.07383742251861e-12	20.0646461370434
PHLDA3	1.31407198006966	8.14132677670485	9.7137861083568	2.24754087056966e-13	9.15794686253219e-12	20.0533070527814
SLC22A7	-1.8700984168201	7.12307954101904	-9.7126252474789	2.25677976255258e-13	9.15794686253219e-12	20.0492105878458
FMO5	-1.30643962363788	5.85634626593818	-9.69587614593834	2.3944248695922e-13	9.6764386482489e-12	19.9900901666381
KLHL13	-2.24977488030823	8.38046897071578	-9.69005528741005	2.44421880928284e-13	9.85734334607894e-12	19.9695369342882
PRODH2	-2.36716447251412	9.16187150704708	-9.67257731954825	2.6000990816975e-13	1.04430209018998e-11	19.9078013741166
C1orf226	-1.50829862119688	6.43955515604985	-9.65495178452247	2.76745727273713e-13	1.10924667782511e-11	19.8455119825493
BPHL	-1.9355694944706	9.68680676288024	-9.64585771424598	2.85801494543265e-13	1.14320597817306e-11	19.8133603886781
FDX1	-1.04058598075321	9.2684285751469	-9.64450030906926	2.87178585498696e-13	1.14637480158339e-11	19.8085606124025
HCK	1.86898831240485	7.7426916968692	9.64259364865858	2.89124207092482e-13	1.15179562175054e-11	19.801818347092
DCN	-2.31460031863503	7.37705040798312	-9.63874641621673	2.93090628389256e-13	1.16296413778976e-11	19.7882127406298
MSR1	1.27360311486361	6.01813310499162	9.63872348805502	2.9311443064701e-13	1.16296413778976e-11	19.7881316513239
CENPH	1.56668654622539	6.66473859540612	9.59457613847938	3.42760005329507e-13	1.34901528201975e-11	19.6318954293614
LILRB2	1.47351612905138	6.49325659455609	9.56791066306041	3.76771614580741e-13	1.47990453823297e-11	19.5374291056173
FBP1	-2.79582030241074	10.1422054639565	-9.53803724134113	4.18936408235252e-13	1.63243610366023e-11	19.4315111928436
BRE-AS1	-2.46825026004722	7.68833564769609	-9.53162646423018	4.28587944775365e-13	1.66343043912815e-11	19.4087694976468
RP11-274H2.5	2.93336759940624	6.7847370717216	9.52843621921202	4.33474154184496e-13	1.67906984624824e-11	19.3974508054912
WDR72	-1.92947634943589	7.82459502603956	-9.51915433406669	4.48012221374552e-13	1.72855109034276e-11	19.364513635343
CENPK	2.26448219361257	5.56192901524153	9.51219116663233	4.59240453573869e-13	1.76777721742589e-11	19.3397987726487
CTSH	-1.44381403856547	12.2292326829934	-9.49302288757898	4.91637499452357e-13	1.88204980259105e-11	19.2717379979447
C10orf10	1.91822461544216	9.95832884036099	9.48781540737057	5.0083040660674e-13	1.91350408762029e-11	19.2532413745688
CYCS	-1.09869187904147	8.81705980517165	-9.48508522588121	5.05719124749942e-13	1.92842312161456e-11	19.2435428556538
KCTD9	1.04969419774491	9.09768652990044	9.47341115884923	5.27171601588573e-13	1.998561584359e-11	19.2020641705419
KLK1	-2.04727058244125	8.07232631007938	-9.47051109748701	5.32641616960408e-13	2.01540071282317e-11	19.1917579415311
IKBIP	1.76238483637807	8.03523439198226	9.4586103465147	5.55694330598214e-13	2.08651511105843e-11	19.1494562285126
ADORA3	1.52799995022563	6.48463547673584	9.45163541720775	5.69670231044243e-13	2.13220656099139e-11	19.124656941251
LCP2	1.03043033269878	5.82584873903167	9.42598936965121	6.24175876317156e-13	2.32582645928066e-11	19.0334308311863
ANK2	-1.65524637982125	6.49766472118223	-9.42157963892476	6.34064373781855e-13	2.35372381176598e-11	19.0177382715056
IDO1	2.6417169953536	8.47360227642806	9.41409958362076	6.51200386482071e-13	2.41276513706022e-11	18.9911151684605
C1QC	2.26900198224742	10.577832925133	9.41338099341469	6.52870984012774e-13	2.41439080880196e-11	18.9885572608944
DTL	2.11646150049429	5.96327849420326	9.41149082541144	6.57285954638407e-13	2.42243827263402e-11	18.9818287376692
FPR3	1.97076474530835	7.22397095121388	9.41139142552345	6.57518959714949e-13	2.42243827263402e-11	18.9814748892276
ARHGEF3	-1.17100923245565	9.36045350264878	-9.40616026742995	6.69899643647671e-13	2.46342082842295e-11	18.9628513814898
LYPD6B	-1.44430189292012	5.92380332782821	-9.40297076767512	6.77563349114876e-13	2.48693663720067e-11	18.9514950748967
KCNMB2	-1.74752572851913	5.51550872500063	-9.37024287853013	7.61496039186035e-13	2.77748500597197e-11	18.8349084325643
CDH13	1.98338871714429	7.27103437477858	9.36919928024935	7.64338388098359e-13	2.77941232035767e-11	18.8311890851356
G6PC	-3.26704892621479	6.13701038337883	-9.36129581518488	7.86214377967941e-13	2.85366700151327e-11	18.8030179470246
KIAA0101	1.50962304308696	7.71531775879029	9.35880934364304	7.93226356726512e-13	2.87379604285391e-11	18.7941538936969
SLC6A19	-2.37389174482662	7.85774744410987	-9.35382586973546	8.07470373605876e-13	2.91462602627535e-11	18.7763864243833
ENOX1	-1.19467040300986	7.04881646052347	-9.35176609076513	8.13432783616206e-13	2.92926224915116e-11	18.7690420308322
TYMP	1.61029384252514	7.84523670407905	9.35139411823557	8.14514247850706e-13	2.92926224915116e-11	18.7677156731506
CYP2B6	-1.19203763413095	5.53798406488842	-9.35009584300157	8.18300191962118e-13	2.93748786858196e-11	18.7630862540921
SLC43A3	1.52705052636735	7.70818602153046	9.34810452284728	8.24141644860177e-13	2.95304867262513e-11	18.7559852400766
UBE2L6	1.14725583455654	10.1024226194839	9.34727532029887	8.26586453281316e-13	2.95640410297697e-11	18.7530282036746
KCNJ15	-2.65799317334926	8.68901424181784	-9.33469970050885	8.64573218884966e-13	3.06986142937416e-11	18.7081738104434
KCNJ2	1.93795589893351	8.02511393719044	9.33182660778501	8.73495975660866e-13	3.09593510360813e-11	18.6979239783537
NUSAP1	1.83249638479624	7.32472544508339	9.3287117453615	8.83274476039158e-13	3.12494218959702e-11	18.686810720599
GNLY	1.35520392784853	7.01490199729619	9.32363635160121	8.99444614354732e-13	3.17641701645995e-11	18.6687006293859
MARCKS	1.32671664241965	9.32445658756457	9.31266594749274	9.35423090100002e-13	3.29753463416547e-11	18.6295473520498
ADCY3	1.01160681519299	7.21049967218354	9.29088162721803	1.01122540208859e-12	3.55197453063377e-11	18.55176485522
PDLIM1	1.39580067673132	11.2280810152891	9.2772609983792	1.06173662034282e-12	3.71596032366765e-11	18.5031082314743
LST1	1.35583774321708	8.20418683654741	9.27677140593609	1.06359884774365e-12	3.71596032366765e-11	18.5013589419819
NPNT	-1.81067988275353	7.19890487701251	-9.2708435570441	1.08640910892465e-12	3.7821702548709e-11	18.4801772132691
DGCR5	1.14431665046099	7.01972385026714	9.26788750683927	1.097967521976e-12	3.81563181395917e-11	18.4696132310673
SORD	-1.871706306838	8.34299173075576	-9.26405256357204	1.11314736468976e-12	3.85947390051638e-11	18.4559071223075
COX7B	-1.13654804225425	10.5577531001809	-9.24955230259218	1.17248057519525e-12	4.02644334074198e-11	18.4040704488239
NMI	1.10877400781446	9.86585439173065	9.24942632903695	1.17300976916514e-12	4.02644334074198e-11	18.4036200210736
SIGIRR	-1.33307078173203	9.38824217114108	-9.23257367770505	1.24601952824995e-12	4.25470082817056e-11	18.3433485629445
SYPL2	-1.22105988291186	7.52280912371179	-9.22476146552916	1.28140083585884e-12	4.36032228868632e-11	18.3154000276825
DIRAS2	2.13102123082138	6.3428211307933	9.20747030274893	1.36335495032195e-12	4.61515665393958e-11	18.2535196930429
FBLN5	-2.2890085540539	8.53611685898001	-9.20121266501415	1.3942986038234e-12	4.70365794060905e-11	18.2311184066845
TMPRSS4	-1.43849905198755	7.20279090240619	-9.19511011897355	1.42515688659941e-12	4.79949741878838e-11	18.2092687933032
PAQR5	-1.54381320153302	8.33186394103268	-9.1920922322392	1.44067058627218e-12	4.84342083892534e-11	18.1984622374003
NCF4	1.26098446334095	6.84977565797476	9.1682195584943	1.56954232156287e-12	5.24966373765057e-11	18.1129482329226
PSMB8	1.36509640731907	10.2343562400841	9.1639961675994	1.59352241440388e-12	5.32079034451721e-11	18.0978141707047
TST	-1.54173555993314	10.3761907191418	-9.15972873022031	1.61812758417387e-12	5.39375861391291e-11	18.082520596797
KCNE1	-1.30719452714267	5.29280761638179	-9.1490846742098	1.68118028377538e-12	5.59441995959211e-11	18.0443672725382
BIRC3	2.21467705403822	8.61997318579676	9.1441660129388	1.71114779920078e-12	5.67487256587737e-11	18.0267329412834
CCND1	1.85185323676357	9.88231751229484	9.1415627053911	1.72722596224391e-12	5.71851838851023e-11	18.0173986909121
NNMT	2.27552471257811	7.69736436254056	9.13674192828882	1.7574023202078e-12	5.80861475144567e-11	18.0001119825414
ANXA9	-2.0825483898656	7.66186517448748	-9.1307194481525	1.79584833826378e-12	5.90580997147149e-11	17.9785131221893
HCLS1	1.92293087079902	9.74236418734111	9.12857374919778	1.80974973315623e-12	5.94155691287473e-11	17.9708170428806
PREX1	1.09724683066007	8.03976110625088	9.12295716176197	1.84665354436385e-12	6.05257683436981e-11	17.9506697715557
ISG20	1.6686405366125	8.18334429296405	9.11846484870668	1.87671530574481e-12	6.14083806220338e-11	17.9345533136131
CLUL1	-1.04980329942559	5.24851786746475	-9.11672974736554	1.88845784795231e-12	6.1626180927868e-11	17.9283280348373
CHL1	-2.16402417056097	5.45276157110999	-9.10524246767044	1.96808919064565e-12	6.40773224861373e-11	17.8871065161928
SUCLG2	-1.28438392506582	10.6270579402235	-9.10383994285395	1.97804061204676e-12	6.42595792693256e-11	17.8820728058328
SCNN1B	-2.02108036813517	6.53876674674433	-9.10158564741386	1.99414198040305e-12	6.46036079601649e-11	17.8739816871302
CGN	-1.42591340526651	7.26203736563439	-9.09108967520662	2.07086589770738e-12	6.69785009819547e-11	17.8363034755341
PPM1H	-1.14323322188088	6.5271335836157	-9.09003187657544	2.07876133228617e-12	6.71231006800805e-11	17.8325056604499
TOP2A	1.85585657553422	5.66265867607261	9.08683009909676	2.10284476058057e-12	6.76777624094897e-11	17.8210097010411
COLGALT1	1.31286851309772	8.29256882296215	9.08151486438585	2.14344762062777e-12	6.88714317447612e-11	17.8019233467275
PKM	1.27405699016288	9.04285179743949	9.07902223898642	2.16275979355459e-12	6.93782192367757e-11	17.7929717587497
SIRPA	1.02103085997243	7.99430894810349	9.06647122192844	2.26269788726626e-12	7.22294439583365e-11	17.7478897001055
FXYD5	1.64665941141472	9.05340103730534	9.06224947005952	2.29734896888036e-12	7.3216324861878e-11	17.7327223938567
CDKN2A	1.00705749625079	6.50370286561195	9.05525594871303	2.35593024386759e-12	7.49614168503325e-11	17.7075935629411
AIF1L	-1.83358346518827	9.21453779861673	-9.04843302057008	2.41453251018061e-12	7.67015189619774e-11	17.6830734932428
CASP1	1.61524973520685	8.45537973225047	9.04277009026792	2.46428516153193e-12	7.80290616575538e-11	17.6627190464052
POLE2	1.17480329076067	6.76322500338363	9.03838882770821	2.50348496339932e-12	7.91424278752044e-11	17.6469693820867
FCGR1B	2.21176955734116	7.59824393068771	9.03570211624957	2.52783341511725e-12	7.97834701067601e-11	17.6373104093206
GABRD	1.17390858565926	6.55291623991529	9.03228695985589	2.55912804347162e-12	8.06413338457297e-11	17.6250316869175
OAT	-1.00745941177034	11.4411896949687	-9.00249266181383	2.84924635195246e-12	8.92096301889269e-11	17.5178667382775
SOD3	-1.45078513468904	7.97731381603294	-9.0006986025224	2.86773779840577e-12	8.9427130570852e-11	17.5114113256526
APOH	-1.59620045504496	6.92285938743205	-9.00049143290429	2.86988087393193e-12	8.9427130570852e-11	17.5106658664898
FAM26F	1.59336859335414	6.8666651518531	8.9973375875459	2.90270586495745e-12	9.01632883568401e-11	17.4993169098205
MYOF	1.13776289072026	8.61192789051551	8.99446916538693	2.93288843228513e-12	9.06697370233258e-11	17.4889942790659
CTSS	1.78931557726924	9.04181139321207	8.9811928517635	3.07675660590902e-12	9.48182853393345e-11	17.4412072736571
COLEC11	-1.95537853722725	8.81355380462784	-8.97915523074644	3.09945786455138e-12	9.53679342938886e-11	17.4338716651294
TRIM9	1.54727800448971	5.78053115165112	8.96655640999742	3.24361686825967e-12	9.94912216242404e-11	17.3885068421888
HAPLN1	2.1174064427011	5.75312920452225	8.9518434527274	3.42053810679493e-12	1.04590556775633e-10	17.335512237453
ANGPTL2	1.12021741460317	7.37251366753317	8.94421888073856	3.51601338466576e-12	1.07342464703191e-10	17.3080419600763
CSPG4	1.31626330880887	6.50517413692775	8.94084930878097	3.55905806648125e-12	1.08487617578589e-10	17.2959002696655
FECH	-1.06921977359	8.23247262314061	-8.93271293885134	3.66519694019324e-12	1.11032241155777e-10	17.2665782119341
CR2	-1.36887473984891	4.18601847224424	-8.93181183078005	3.67714623585258e-12	1.11222324417763e-10	17.2633304277164
ATP6V0E2	-1.33650336051292	9.39885206869607	-8.9296665840381	3.70575174127904e-12	1.11914844574837e-10	17.2555982255797
RGS1	1.75906157099347	7.08518145076819	8.9273444081727	3.73696910508238e-12	1.1268399147633e-10	17.2472278681434
PNMA2	1.26942022570959	7.93378907528533	8.90768202246187	4.01213593724503e-12	1.20424939327429e-10	17.1763357954703
PROC	-1.61889167191743	7.00994730139591	-8.89878733469418	4.1432296115811e-12	1.23603196936057e-10	17.1442555442319
DNAJC12	-1.85092990370159	7.46727247958633	-8.89475993651778	4.203997419076e-12	1.25225455036306e-10	17.1297278327662
TMEM61	-1.49164966209629	7.25345921037654	-8.88949133103154	4.28485031524933e-12	1.2724706996801e-10	17.1107207538821
KCNE4	1.75267946604762	7.02961067067821	8.88417154115422	4.36807748639493e-12	1.29522418658609e-10	17.091526657579
KCNMA1	1.04552077146014	6.08964106168712	8.88012001422292	4.43255314626187e-12	1.31235712487511e-10	17.0769069337866
CCNE2	1.26170933406203	5.46036015076373	8.87898801773548	4.45073830464579e-12	1.31575370695411e-10	17.0728219380144
TAGLN3	-1.01154380072509	6.81015949684737	-8.87078738617836	4.5847414844047e-12	1.35332730563753e-10	17.0432254127956
SLC2A1	1.78418697902734	7.2862823591598	8.86971536197072	4.60255664036263e-12	1.35654300979109e-10	17.0393560046657
RANBP3L	-1.00641458808372	4.0242981300568	-8.86728536162985	4.64319744104218e-12	1.36646651418058e-10	17.03058470754
ESM1	2.458385441407	8.91699369981171	8.86373583773759	4.70321206192968e-12	1.37998437745242e-10	17.0177715102812
PLXDC1	1.09808339817146	7.0318928886109	8.85719417238243	4.81587077170094e-12	1.40882189739311e-10	16.9941544338522
CCDC127	1.04910177957659	8.18649494369277	8.84105722938523	5.10553337119825e-12	1.48911389993282e-10	16.9358808238135
SEMA6D	-1.17920307506052	6.46437692467947	-8.83590047914323	5.20174802138986e-12	1.5126744988018e-10	16.9172542799538
CSF2RA	1.12729320863542	6.31297385813116	8.82896687469417	5.33399891505651e-12	1.54883524052011e-10	16.8922061727752
HOGA1	-2.39468578431528	9.98882606395508	-8.82640425275709	5.38373034875171e-12	1.56096323721203e-10	16.8829475336965
SLC22A12	-2.86527359688992	8.26141173000429	-8.8105468915448	5.70201778821026e-12	1.645943279071e-10	16.8256436698874
PSMB9	1.75156391351602	10.0888819860863	8.80713677384539	5.77290319265072e-12	1.66151105104191e-10	16.8133178285516
FMO4	-1.71176856030145	8.86316987945762	-8.80545975178433	5.80808781184227e-12	1.66674262243204e-10	16.8072559004911
RHBDF2	1.52816539584535	7.98716414524239	8.8020966494389	5.87929895576715e-12	1.68471139668181e-10	16.7950986147573
OSMR	1.60379373145458	8.45058644498913	8.799731905735	5.92989624415107e-12	1.69672943628264e-10	16.7865497494879
IGSF6	1.88271102431529	5.92627644002538	8.7987717465262	5.95056521538307e-12	1.70016149010945e-10	16.7830785162231
SLC7A13	-4.35015437348016	6.34425204594999	-8.79556629882237	6.02009424652038e-12	1.71432128438023e-10	16.7714894228972
GJB1	-1.07759689726073	8.37785959286287	-8.79153998605731	6.10858850669579e-12	1.73017824756124e-10	16.7569313688859
ACAD8	-1.33462878010632	9.29122038552619	-8.78949421524164	6.15405296588969e-12	1.74054023277688e-10	16.7495339163365
PLA2G7	2.35681747336672	5.38439247356987	8.78739243284341	6.20111695880846e-12	1.75132409787674e-10	16.741933576518
WNK4	-1.89197274015875	6.63660143576835	-8.78685965026879	6.21310469969683e-12	1.75218492250443e-10	16.7400069035722
SHMT2	1.28581583082385	9.48032701742612	8.77461099702425	6.4952282113908e-12	1.82649172085021e-10	16.6957064745579
HAO2	-3.14552443314371	8.37378710099793	-8.76862902621457	6.6376625987099e-12	1.86387087299017e-10	16.6740667617137
PALM	-1.08917875189327	8.70501097276129	-8.75758451909093	6.9089523221334e-12	1.92899523523953e-10	16.6341058858609
STAMBPL1	1.28381331013941	6.68395055103582	8.74593903738048	7.20710316617113e-12	2.00083883933363e-10	16.5919600979957
CHRDL1	-3.28619152452691	7.81431481329437	-8.741447352647	7.3255315227481e-12	2.03084042214799e-10	16.5757015219382
HDHD3	-1.20878166661976	8.63222959513381	-8.73903405690291	7.38996764681029e-12	2.04298032113752e-10	16.5669654453105
LAD1	-1.05693003124985	7.61726686823007	-8.73902656347398	7.39016861064541e-12	2.04298032113752e-10	16.5669383185512
ST6GALNAC2	-1.58656232932507	8.21652687053513	-8.73675464454887	7.45135279697612e-12	2.0512150957968e-10	16.5587136026209
EMR2	1.18232022820357	5.65350118273533	8.73541877965394	7.48756621164041e-12	2.05829309604701e-10	16.5538773650002
C14orf37	-1.39524196426165	6.56334747260314	-8.73303378892549	7.55266093325511e-12	2.07327947187395e-10	16.5452426238784
PIPOX	-3.16539676652059	9.31143460999944	-8.73031105908901	7.62767028502185e-12	2.09094178442557e-10	16.5353845692742
EBF2	1.03120716758144	5.3451242827927	8.7276925442307	7.70051576135585e-12	2.10502243964539e-10	16.5259032925596
C21orf33	-1.12089873981501	10.5011487137944	-8.71776507093287	7.98310867546301e-12	2.17215283281393e-10	16.4899524276358
CDKN2B	1.1149083384068	5.42913831711288	8.7175129653856	7.99041934927981e-12	2.17215283281393e-10	16.4890393648218
ALAD	-1.21595670260246	8.60075404951116	-8.71566483428309	8.04421844907033e-12	2.18374905265621e-10	16.4823457481249
PGBD5	1.69382814464021	7.53804735745458	8.71100696370359	8.18143182314647e-12	2.21486275875236e-10	16.4654745535271
ABCA8	-1.07647747582736	5.62096827815679	-8.70625509375148	8.32384192209819e-12	2.25030760928448e-10	16.4482611486422
RP11-63A11.1	-1.06580274574939	5.13434633243769	-8.70432380735437	8.38243173644115e-12	2.2575037021781e-10	16.4412646624109
DEFB1	-3.52549357499365	11.2019316864096	-8.70424465468532	8.38484183976509e-12	2.2575037021781e-10	16.4409779092587
PTPN3	-1.02232271905724	8.54224505811031	-8.70423900964913	8.38501375094723e-12	2.2575037021781e-10	16.4409574584841
CORO1A	1.70261712857053	8.45591087530723	8.70253515584182	8.43706452372087e-12	2.26840143573291e-10	16.4347846430532
NELL1	-1.12274423865197	5.93667262291212	-8.68775148231691	8.90256083922234e-12	2.39027660888709e-10	16.3812161261986
HES4	1.3220222835657	7.91913224730602	8.6838604920144	9.02931720594279e-12	2.41768602782075e-10	16.3671143594173
SLC22A6	-3.14079635502955	8.35353237598414	-8.67670424171008	9.2672067095829e-12	2.46789743896501e-10	16.3411755744794
PRKCDBP	1.95048655352477	8.58267536535341	8.66994768234269	9.4975958192111e-12	2.5223967216333e-10	16.3166819308456
IL10RA	1.67574645396033	7.9715243290136	8.66658856200455	9.61427334444117e-12	2.54992906023068e-10	16.3045032700928
GAS2L3	1.96730298955325	7.55180277635792	8.66114930172258	9.80627018695343e-12	2.59733642789577e-10	16.2847811378873
CCL28	2.03048592483315	7.40235861432294	8.64379721907798	1.04449407417345e-11	2.75904095064686e-10	16.2218495162329
OXCT1	-1.59543499961871	9.18285073691036	-8.63799257876132	1.06678021188106e-11	2.81391346421481e-10	16.2007924892862
MRO	-1.95589566414765	7.04992402148303	-8.63764273392257	1.06813858029378e-11	2.81391346421481e-10	16.1995233045227
MECOM	-1.08001683023898	6.24581973421932	-8.6371210446526	1.07016741492539e-11	2.81547400436746e-10	16.197630676821
COPG2IT1	-1.1225253529974	6.11101193960352	-8.62772809647312	1.1073669623425e-11	2.88622240185014e-10	16.1635506749976
LHFPL2	1.60201968402254	8.44228021326327	8.61871722628376	1.14427568370593e-11	2.9745097348324e-10	16.1308507658364
MTFP1	1.18639962664038	9.40613354935904	8.61782269397779	1.14800657906283e-11	2.97972017208061e-10	16.1276042322896
PTPRC	1.17632192613056	6.30454923369245	8.61750832706008	1.14932063780252e-11	2.97972017208061e-10	16.1264632837189
TLR2	1.45802631590284	8.8937122815168	8.61665885991614	1.15287899824779e-11	2.98141374779122e-10	16.1233802307799
CNDP1	-1.67973545818153	6.86155686226813	-8.61662617530972	1.15301613307436e-11	2.98141374779122e-10	16.1232616043201
EHF	-1.2875908228917	5.17595321595056	-8.60560377572519	1.2002115430551e-11	3.08715829972178e-10	16.0832520784685
CHST15	1.29819350906	7.87999522204265	8.60512448727402	1.20230727894513e-11	3.08849576242787e-10	16.081512135429
ZGPAT	-1.36198792502345	8.63211899898059	-8.5997761306003	1.22594475475559e-11	3.14509387345675e-10	16.0620950475347
NKG7	2.05398786476125	8.06339254062858	8.59934632323946	1.22786449639215e-11	3.14590119337073e-10	16.0605345502975
TUBB6	1.68172162351796	9.64080726330894	8.59883180722038	1.23016656817034e-11	3.14768469140192e-10	16.0586664843422
CHST11	1.30634781757113	7.57155676122682	8.59101214782558	1.26569295016903e-11	3.23436529639022e-10	16.0302730642945
MCTP1	1.24752103599206	5.86041809248692	8.58639685807985	1.28714373175585e-11	3.28062641643883e-10	16.0135127071371
NR3C2	-2.21933703543101	8.44449988907042	-8.57507943417432	1.34130543926914e-11	3.40980371072311e-10	15.9724070766061
KCNK5	-1.54208625594664	8.62835873990117	-8.57176888123943	1.3575779663676e-11	3.44224167410155e-10	15.9603811711269
PCP4	-3.3542460093474	7.40775423246719	-8.56504341283388	1.39125013979309e-11	3.51836476093549e-10	15.935947811206
TYMS	1.16158942924977	8.08100857896338	8.56472464803714	1.39286678071083e-11	3.51836476093549e-10	15.9347896702611
PAQR7	-1.37756768769321	8.38940772874952	-8.56470130679755	1.39298523188058e-11	3.51836476093549e-10	15.9347048662383
RASSF8-AS1	-1.06389971400033	6.6308918226593	-8.55918097598329	1.42128610111255e-11	3.58522620100463e-10	15.9146471485978
SLFN12	1.20087603717366	6.90762435417875	8.555927394934	1.43823628441616e-11	3.62332020238519e-10	15.9028244734373
EMP3	1.34159586271393	10.0371644097596	8.54786325586569	1.48112987892313e-11	3.71704809563295e-10	15.8735181974741
THEMIS2	1.47164488764057	7.64135088470755	8.54166736321051	1.5149584342216e-11	3.79708252055542e-10	15.8509982479137
CD70	2.70802064968853	8.83588926317801	8.53834590821178	1.53341191642526e-11	3.83352979106316e-10	15.8389247694676
TMC4	-2.09615629626783	8.45395739138901	-8.5336250404564	1.56003006372378e-11	3.89510691069887e-10	15.8217630811225
LAIR1	1.17636719272408	7.60639415514156	8.53260846537702	1.56582246552233e-11	3.90459546109894e-10	15.8180673365625
EVI2B	1.98983886855276	8.07047100319033	8.52990987036188	1.5813040992363e-11	3.93697481563712e-10	15.8082562768819
COMMD8	-1.14448325516519	11.0592493586141	-8.52964627267945	1.58282456873574e-11	3.93697481563712e-10	15.8072979088631
TGFBR3	-1.6069059489811	9.74300089656315	-8.52704435468604	1.59791192894619e-11	3.96946436088027e-10	15.7978377935737
ERV3-2	2.30665738514642	7.71872803111829	8.51861270938331	1.64780435399243e-11	4.08515375120359e-10	15.7671785356028
SLC22A13	-1.39576577667245	6.77626165446247	-8.51847179954381	1.64865133530716e-11	4.08515375120359e-10	15.7666661148987
HLA-F	1.02172176756818	10.4005336335819	8.51449145939357	1.6727581109752e-11	4.13965391099924e-10	15.7521909733723
RGS7	-1.93145843734004	5.20447886631143	-8.50781362276586	1.71400123241604e-11	4.23103578782801e-10	15.7279034617914
OAS2	1.03473333382559	6.42384534711078	8.4977993223149	1.77777583195683e-11	4.37743797818517e-10	15.6914752871678
PHYH	-1.27133615454444	11.493687419358	-8.48463021633389	1.86528904903574e-11	4.56425285406996e-10	15.6435605488428
RP11-320H14.1	-2.08026333254544	4.58740602526521	-8.47938375127932	1.90134894683366e-11	4.64668819924435e-10	15.624468371611
ABHD17C	-1.44460346594222	8.46758674746399	-8.47697498821643	1.91813883953505e-11	4.68188309525367e-10	15.6157021155925
PPP1R3C	2.01317516919014	7.81128001989955	8.47285492809431	1.94720342466237e-11	4.74691382131624e-10	15.6007069822813
KCTD6	-1.12459574052418	8.44669982072892	-8.46273982121665	2.02045206748586e-11	4.91936155561775e-10	15.5638877022537
MARVELD2	-1.54835746498219	7.1587268522802	-8.45440382522172	2.08289582715916e-11	5.06510647795528e-10	15.5335392052998
GABARAPL1	-1.28658527258008	9.54279131775544	-8.44647033263298	2.14412628141747e-11	5.18185883055269e-10	15.5046517180833
MIOX	-3.56719907982814	10.3781456578992	-8.44520331723813	2.15407133467309e-11	5.19948253196953e-10	15.5000378600323
NPY5R	-1.17804117910892	5.57140774452076	-8.4399222096999	2.19602587981479e-11	5.29423213337882e-10	15.4808054550796
DHRS11	-1.39677090595813	7.83751483960832	-8.43892400106288	2.20404777470317e-11	5.30704378184056e-10	15.4771700313693
ABCG1	1.36151270327837	7.40498421797422	8.43610045232981	2.22689854890096e-11	5.35548608079248e-10	15.4668864529541
MS4A6A	1.36135862607277	8.27599480421483	8.42587665966082	2.31165032600324e-11	5.54569723251695e-10	15.4296461706774
CYP8B1	-2.28719429561112	7.75718167313764	-8.41982882777701	2.36330395310022e-11	5.65577014417147e-10	15.4076136003119
FUT3	-1.47669952757963	6.74120551926628	-8.38952228341737	2.64016570561612e-11	6.28763643135795e-10	15.2971689762646
TLR3	1.60728968746329	7.95627973148583	8.3891189536522	2.64406219194513e-11	6.28927414588891e-10	15.2956987370774
C9orf135	-1.16995696370746	4.86015601114639	-8.38806777040999	2.65424465055617e-11	6.30584183647283e-10	15.2918668582078
GPR4	1.11197310879467	7.30899083528077	8.38528751828054	2.6813664601655e-11	6.36256448174865e-10	15.2817316582301
CAPN3	-2.47011448625992	8.32074094498257	-8.383030364729	2.70359016392624e-11	6.40754138004284e-10	15.2735030066789
WLS	-1.68319251404482	9.40381324174327	-8.38010780481806	2.73264074938093e-11	6.44521765196947e-10	15.2628480685938
TLR7	1.21626043012671	6.43793208664635	8.379233818901	2.74138907862631e-11	6.4503272438266e-10	15.2596616227801
PCK2	-1.98493004221126	9.94987433551309	-8.37324319790877	2.80211610914115e-11	6.57742224421156e-10	15.2378192267051
ABCC1	1.14286956759297	8.26233014575045	8.3617227052273	2.92272735459728e-11	6.81969716072699e-10	15.1958079023883
ASPM	1.28962271782971	5.00541704764926	8.35824441832902	2.96015829380729e-11	6.89062975755617e-10	15.1831221061585
HIGD1B	1.34100179180387	7.66794330584239	8.35691994561001	2.97453772328394e-11	6.90769423890582e-10	15.1782913676023
MYC	1.53682831747841	9.88105695146102	8.35230653204659	3.0251747846228e-11	7.0169734649239e-10	15.1614640326441
CHGB	-2.41231441706167	7.20967999506187	-8.35150609585074	3.0340482254798e-11	7.02923702357022e-10	15.1585443201151
SLC5A11	-1.14324531180538	6.75457655294814	-8.34273398210702	3.13302536487356e-11	7.22438790017903e-10	15.126544051859
RAD51AP1	1.60764123878912	7.07453372445762	8.34200721483109	3.14136977195431e-11	7.23511721860217e-10	15.1238926207077
HSPA2	-2.11981151383119	8.98943876415099	-8.33485438310618	3.22469676652532e-11	7.40961976833484e-10	15.0977955096014
CORO2B	-1.71650854876599	6.13276296703369	-8.32857477531395	3.29968094654244e-11	7.56139377254184e-10	15.0748817181618
FEM1C	1.27705406756493	8.60503687767454	8.31330232523685	3.48944576380638e-11	7.91587233456077e-10	15.0191435313802
TTC36	-1.24648102855094	7.09393630045702	-8.31095342399075	3.51958963387947e-11	7.97502391029338e-10	15.0105697253699
SLC16A10	-2.0729765233297	7.03387704120299	-8.29740020963215	3.69870439874368e-11	8.3327133580892e-10	14.9610920588283
ATAD2	1.19827809391725	5.67021771021987	8.29398561025811	3.74525775589468e-11	8.41823991003851e-10	14.9486248781166
RUNX3	1.14388061285244	6.80992789217261	8.29346884898805	3.75235421152308e-11	8.42452950124311e-10	14.9467380485871
FLT1	1.2577478536064	8.15436589430767	8.29017800333976	3.79786411275116e-11	8.51694926886987e-10	14.9347219368667
MFSD3	-1.1162933033221	7.2452522629642	-8.28095992340137	3.92831854449624e-11	8.75939061116339e-10	14.901059783357
BCKDHB	-1.13530978222013	8.06095265346562	-8.27595937006939	4.00096117628476e-11	8.91123171081606e-10	14.8827968560129
SLC25A10	-1.00578590019558	7.61857014582267	-8.25744869926305	4.28181309855366e-11	9.46783285452029e-10	14.8151795364369
CDC45	1.01828827405395	6.22450118015578	8.2574190099483	4.282279114988e-11	9.46783285452029e-10	14.8150710684994
PLAG1	-1.15037327173133	5.51055757088015	-8.24881329845594	4.41952969755612e-11	9.75481780091215e-10	14.7836284835239
FAM129A	1.49666546539369	8.10762764940678	8.24018898540781	4.56151288079971e-11	1.00230552089321e-09	14.7521135743334
ZNF684	-1.04604143073517	6.2812350563353	-8.23544244575302	4.64160232962201e-11	1.01876154155198e-09	14.7347669482563
DNAH11	1.03860062754379	4.93108399787421	8.23470706210708	4.65413643547866e-11	1.01982762556599e-09	14.7320793100613
CD247	1.32442420660284	6.56358752684615	8.22687383212145	4.78977782143559e-11	1.04426746718729e-09	14.7034489240762
RP11-134G8.8	1.35990676960605	6.79687468499715	8.2249612941579	4.82349464406197e-11	1.05044994470683e-09	14.6964580764939
HIGD1A	-1.21612351538926	10.5743515757184	-8.21802589528183	4.9477744071157e-11	1.07512614611383e-09	14.6711055387615
RGS5	1.38067566362001	9.15439069737984	8.21708409958958	4.96489736941109e-11	1.07765214219776e-09	14.667662566451
LYN	1.09490242271816	8.50398459300514	8.21588261002327	4.98682834153213e-11	1.08121499440298e-09	14.6632701438478
LHPP	-1.02207361809505	8.09634715718138	-8.19151071410275	5.45332136114864e-11	1.17440368661112e-09	14.5741533198184
TAP1	1.49361397794252	9.18755740122893	8.19124806642063	5.45858040052412e-11	1.17440368661112e-09	14.5731927554841
FOXC1	-1.29164659361296	9.15959390023344	-8.18886494685797	5.50653150424455e-11	1.18212505458043e-09	14.5644769503938
EIF4EBP1	1.50956985180713	9.03284716649181	8.18344739967829	5.61711944501457e-11	1.20191638779788e-09	14.5446621251892
DTX3L	1.06790770647273	9.97162781477001	8.15026690946305	6.34484127792799e-11	1.34376670631205e-09	14.4232682372752
BNIP3	1.07784177835205	11.4027261592561	8.1489815358495	6.37486404046432e-11	1.34786769356096e-09	14.4185643704527
SHISA3	-2.69361595525582	7.67607952512469	-8.14835554653547	6.38953705159647e-11	1.34862946419093e-09	14.4162735097517
FUT6	-1.31095575043242	7.62467000137633	-8.14619555126143	6.44042774034462e-11	1.35733745925542e-09	14.408368662525
CD36	2.01243644109227	6.50431812013928	8.14156214941863	6.55097111740316e-11	1.37915181419014e-09	14.3914111423245
APOC1	2.19918574173429	9.12923932580216	8.12860943672895	6.87021411348283e-11	1.43685805563476e-09	14.3440001618046
AMT	-1.20594731978124	8.9952046416288	-8.12494052820827	6.96344927986739e-11	1.45041026445697e-09	14.3305691877204
TRIM22	1.4129421835996	10.5473589388901	8.12286690189427	7.0167058808804e-11	1.45840334321586e-09	14.3229778357075
SMTNL2	-1.64997561692929	8.2633514468226	-8.12142666640627	7.05393580705363e-11	1.46458836671876e-09	14.3177051348004
RP11-297L17.2	-1.09529152234435	7.90201846475079	-8.11591680353035	7.1982061190568e-11	1.49223342862534e-09	14.2975325242807
GBP2	1.91708910302692	8.6303278845994	8.11576168643238	7.20231032387537e-11	1.49223342862534e-09	14.2969645893001
MND1	1.29553062417007	5.24938092312501	8.11542254450554	7.21129178583196e-11	1.49251656813418e-09	14.2957228741877
PAPPA2	-1.14251528279333	6.34950452240061	-8.10639540944457	7.45453650774712e-11	1.53475751630088e-09	14.2626692230602
CLEC2B	1.59166534548379	7.872746233977	8.09809667396691	7.68541928069383e-11	1.57732165341989e-09	14.2322789367205
CDC6	1.48422626258022	4.9132466801459	8.09518404028509	7.76814469147988e-11	1.59096798279003e-09	14.2216119181598
NFE2L3	1.53669027468673	6.71111219944306	8.0918226617227	7.86472786864626e-11	1.60738963738756e-09	14.2093009071047
NDC80	1.88267573906671	6.32791682456545	8.0915265553722	7.87329354290382e-11	1.60746409834286e-09	14.2082163931746
EVI2A	1.75479686456664	8.3740911523767	8.08969295138904	7.92654454766773e-11	1.61665216580944e-09	14.2015005674309
HYAL1	-1.5436468147803	8.96470496333137	-8.08868814401387	7.95587916265320e-11	1.62094835330564e-09	14.1978202498773
NDNF	-2.93610457975539	7.92523672955982	-8.07543402275219	8.35318551069202e-11	1.69201022790814e-09	14.1492694472785
TLR8	1.36269536854719	6.11341629936191	8.07532748033098	8.35645867660754e-11	1.69201022790814e-09	14.148879138669
MT1F	-1.8502421954547	11.7494392560048	-8.07099714595757	8.49058988031124e-11	1.71562434694949e-09	14.1330148633399
CTH	-1.4985694443415	7.25445725095259	-8.0605650827049	8.82266840498906e-11	1.77722816791147e-09	14.0947929131626
SLC16A1	1.44099729795309	7.95938977421214	8.05945543503323	8.85875007132640e-11	1.78266428540039e-09	14.090726965198
PYCARD	1.59062734194227	8.6077003679926	8.05712758698004	8.93492542419849e-11	1.7961491109158e-09	14.0821971142653
ITGA4	1.41918327139609	6.18750336544925	8.05340335313815	9.05816596598938e-11	1.81814812074603e-09	14.0685499789477
ACN9	-1.15365015854605	8.42936151705202	-8.04641967054723	9.29388772238193e-11	1.85877754447639e-09	14.0429570317456
ZAK	1.03591429688211	7.50766428027433	8.04162336335461	9.45933755110085e-11	1.88801441956799e-09	14.0253787266844
HLA-DMA	1.26263118152722	10.4324499221785	8.03991559969757	9.5189586979936e-11	1.89605274878734e-09	14.0191195592872
BID	1.06489649867967	8.12686219954559	8.03377542222121	9.73645845290118e-11	1.93740696118643e-09	13.9966138709614
AGMAT	-1.79533387411403	8.4501019149467	-8.03293051841156	9.76677505790328e-11	1.94146846992804e-09	13.9935168889918
TNFSF13B	2.1126528338562	8.16752972913277	8.03216829203143	9.79420638288925e-11	1.9449487852546e-09	13.9907229303025
LYPLAL1	-1.20180509513549	10.0147859723368	-8.03063324383806	9.84968537952348e-11	1.95231906540275e-09	13.985096090082
GMFG	1.08334165813265	9.04346784593394	8.02968920655031	9.88396094394957e-11	1.95682459092335e-09	13.9816355905794
C3	2.54048256561808	11.2507067840734	8.02540056816204	1.00411846723004e-10	1.98394374573678e-09	13.9659144530235
S100A10	1.06075978506929	9.85783259545471	8.02464707845213	1.00690662695176e-10	1.98744913275473e-09	13.9631522462378
ITGA5	1.57205449418674	8.41022769915022	8.01960258642856	1.02577422871062e-10	2.02265340872517e-09	13.9446590187165
WDR54	1.08725383319549	9.99300872335341	8.01705557956218	1.03543511459312e-10	2.03965108000254e-09	13.9353211704672
RAC2	1.76296951926751	8.03392808090381	8.01238962325691	1.05337088534812e-10	2.06563992484592e-09	13.9182140218453
CLEC4A	1.54085443770922	6.68140878901436	8.01204588370318	1.0547044810398e-10	2.06563992484592e-09	13.9169537027808
AK3	-1.05038067331069	10.6146218251528	-8.01171090550335	1.05600571668143e-10	2.06563992484592e-09	13.9157255018017
ADA	1.56252451504321	7.1887822786235	8.01074209642075	1.05977817305599e-10	2.07095236210343e-09	13.9121733236379
SEMA5A	-1.2204700004647	8.78102015416564	-8.00912105965261	1.06612063589024e-10	2.08127136090127e-09	13.9062296270154
SLC2A3	2.16556482406002	8.50265069747904	8.00161364923852	1.0959947706665e-10	2.13321722989707e-09	13.878701331833
TGFBI	2.75943010502914	11.0338949816668	7.99074780546377	1.14072818945118e-10	2.2093154657355e-09	13.8388536243358
RP11-532F12.5	-1.58356566299894	8.2773601586528	-7.98087513449883	1.18296069110668e-10	2.28417399227241e-09	13.8026434011771
NOX4	-2.0416195104444	9.00708070922839	-7.96310290681675	1.26298174144985e-10	2.42696546366817e-09	13.7374486204544
CCDC102B	1.40815109649341	6.82874958685898	7.95320932736793	1.30986070531115e-10	2.50960604341139e-09	13.7011493575803
CTNNAL1	-1.21947940595111	9.42015313831692	-7.95151132608557	1.31808026021456e-10	2.52213053248191e-09	13.6949190028683
NUDT6	-1.2123011144646	8.5155262932481	-7.94972852211431	1.32676605445252e-10	2.53456283306719e-09	13.6883773509476
RNF157-AS1	-1.46953449023037	5.79712525178123	-7.9459118928639	1.34555429026731e-10	2.56795171268152e-09	13.6743725036824
SAMSN1	1.33513216729395	6.26870257826704	7.94510771230479	1.34954699787621e-10	2.57306626054219e-09	13.6714215393552
PIP5K1B	-1.07496896999653	6.26030540036118	-7.94449362907223	1.35260389101219e-10	2.57638836383274e-09	13.6691681237357
CLEC7A	1.01001567971368	6.00898920532361	7.93503634258515	1.40056964073874e-10	2.65742158358948e-09	13.6344619638523
BCL6	1.00482459256584	8.64900162513595	7.93206532135675	1.41598784297563e-10	2.68407753600797e-09	13.623558169971
SLC16A7	-1.57530686853781	6.71098401913684	-7.93108126505815	1.42113210543483e-10	2.69045463309943e-09	13.6199465511551
MTCP1	1.47886313205373	5.66404359800523	7.93074192488477	1.42291039035899e-10	2.69045463309943e-09	13.618701117473
MOB1B	-1.15882548218353	9.49094634665771	-7.93063520101134	1.42347012985924e-10	2.69045463309943e-09	13.6183094224593
HMCN1	1.65362825675468	6.83540027707192	7.92926086496685	1.43069795361044e-10	2.69892693330559e-09	13.6132653285352
TNNI1	-1.11372936911375	6.19676972106858	-7.92024881160317	1.47901518005378e-10	2.77967599471757e-09	13.5801872507351
PROCR	1.60599672277508	8.42369946730144	7.91794876932151	1.49160684937657e-10	2.80033469806328e-09	13.5717445615491
TNFSF15	-1.79438329710183	6.80967908692572	-7.91361683228701	1.51561514545263e-10	2.8426848661121e-09	13.5558428562936
TUBB2B	-2.71578031533392	6.72864132481125	-7.90496675067943	1.56472222161847e-10	2.92638888775973e-09	13.52408771731
CLSTN2	-2.3753248187069	6.20552681962019	-7.89563330533585	1.61950189059165e-10	3.02307019577108e-09	13.4898204046066
GALNT3	-1.31523177468132	6.29265943500578	-7.89445373200062	1.62656066508104e-10	3.03335766275817e-09	13.485489399895
GPHN	-1.39903124089222	7.61831458746374	-7.88504119733361	1.68400469237854e-10	3.12712767543835e-09	13.4509276346351
SSPN	1.14278280596807	7.44706978385006	7.88140654732201	1.70672781613223e-10	3.16180200342077e-09	13.437580646284
ETNPPL	-2.68006399064952	5.30255998084989	-7.87205111805784	1.76664181249061e-10	3.26046888180941e-09	13.403223640445
KLHL6	1.13525470424762	5.38808365264889	7.86345915554296	1.82352444558474e-10	3.35596987168648e-09	13.3716673281976
PDSS2	-1.02955169576314	8.05423459760249	-7.86247008666212	1.83018940508898e-10	3.36192243109128e-09	13.3680345173623
TMEM132E	-1.34720412797972	6.96939678374343	-7.85971797428975	1.84886378748325e-10	3.39304590212282e-09	13.3579259153958
BRIP1	1.024227679158	4.62761005111945	7.85542918211276	1.87834721562474e-10	3.43799863195794e-09	13.3421724456511
ABCB1	-2.24643088898237	8.01386288430577	-7.85346628882242	1.89199813676818e-10	3.45280851775199e-09	13.3349621626262
PLK2	1.89513315068316	8.80869060781539	7.85244852350902	1.8991153257946e-10	3.46257305912319e-09	13.3312235530867
SLC1A3	1.03541909528472	5.73493708955368	7.8432284714537	1.96482752768287e-10	3.56208674013279e-09	13.2973532406294
AK055981	-1.38230498337322	7.89700251925663	-7.84318590524974	1.96513613317141e-10	3.56208674013279e-09	13.2971968640218
PPP1R13L	1.21499481953502	7.82372447827164	7.84306430728516	1.96601798785308e-10	3.56208674013279e-09	13.2967501459291
NKAIN4	-1.5451914839291	7.21566096906441	-7.83756316420412	2.00633163335604e-10	3.62768450311608e-09	13.2765398415213
ARHGAP24	-1.80118942103107	8.69782869169723	-7.82903633748817	2.07046390761293e-10	3.72645478321520e-09	13.2452114021227
CTHRC1	3.41181325937508	8.94186108655372	7.82724104151116	2.08422675152043e-10	3.74778388346793e-09	13.23861495152
PCSK1N	-2.31905040066781	9.21839836701389	-7.82549496482297	2.09770033661857e-10	3.7685542252726e-09	13.2321992316663
FLJ32255	1.4240922696717	6.11845128835248	7.81859124839886	2.15183429280738e-10	3.84817081560444e-09	13.2068313604052
PBLD	-2.22175082905561	10.2436071321794	-7.81378024199034	2.19038547252783e-10	3.91354195638518e-09	13.1891521616311
OLFML2B	1.88849625251414	7.98447300650414	7.81116132282271	2.21166172826933e-10	3.94795718343159e-09	13.179527957353
TNFRSF1B	1.25511748426305	8.55677699554876	7.81056883074976	2.2165038625635e-10	3.95300051922153e-09	13.1773505874745
HLX	1.09247112081797	7.75570312733789	7.80208717944158	2.28699761816084e-10	4.06786269588569e-09	13.1461796733236
CRISP2	-1.41280906236794	4.07833104310415	-7.79594808082548	2.339421126533e-10	4.1458095913243e-09	13.1236162578717
ART4	-1.28753416712688	5.35189230829267	-7.79508159893603	2.34691673274098e-10	4.15533585923426e-09	13.1204315140524
GPD1	-1.05303832748085	7.22554177442276	-7.79298488638717	2.36515445483223e-10	4.18007460006418e-09	13.1127249617353
LINGO2	-1.02788463548157	5.3871817585784	-7.77620407620952	2.51633605464368e-10	4.42730580529767e-09	13.0510408394318
AP1M2	-1.44826573914535	8.84592041685642	-7.7743508825266	2.53361543653411e-10	4.44971886703124e-09	13.0442281347342
SPATA17	-1.35380018283194	6.78061458061103	-7.76918460974244	2.58241745804531e-10	4.53136814482435e-09	13.025235276664
GALM	-1.38388672924179	9.71841921818602	-7.76540831146445	2.61868502181447e-10	4.58269878817532e-09	13.0113518296536
GRHL2	-1.26245358464563	5.90613997620166	-7.76215711591643	2.65031860528585e-10	4.61786028880322e-09	12.9993985197833
CD300LF	1.33745080595603	6.263890854997	7.7608605334881	2.66304080827186e-10	4.63548844068635e-09	12.9946314195824
RCSD1	1.36675174198205	8.08172627384536	7.7444910458763	2.82902937641585e-10	4.90698900688058e-09	12.9344414643761
AOAH	1.0081120152088	7.46032535851069	7.72171954117964	3.07733964756039e-10	5.30482472226768e-09	12.8506970339276
COL4A1	1.35127547574791	11.0669808892486	7.72116858719799	3.08361097476245e-10	5.31096442050475e-09	12.8486706425821
ASB9	-1.63434144895815	7.68716335986495	-7.70352915780168	3.29131605496478e-10	5.63404320325848e-09	12.7837884035818
IL4I1	1.02973391083637	7.56486800655797	7.69874227525288	3.35006435641595e-10	5.72960396036236e-09	12.7661794103531
PLAT	-1.80284272992028	9.25110865829576	-7.68982862659246	3.46227677309653e-10	5.91120424675017e-09	12.7333878950185
CSTA	2.02145888761783	7.95528910217464	7.68862420080275	3.47772545007096e-10	5.92725381055572e-09	12.7289568747978
NAP1L2	-2.32845638987937	7.72852359014013	-7.68542700323833	3.51907077419496e-10	5.98730791442893e-09	12.7171943433976
FHOD3	-1.242466948393	8.42167082405226	-7.68230232059046	3.5599546639173e-10	6.04637013975555e-09	12.705698306455
MSRA	-1.05704266679305	7.70014498818667	-7.68029880784225	3.58641927677077e-10	6.08604483330798e-09	12.6983270223935
GGH	-1.70513570141146	10.1438505086277	-7.67836767395575	3.61211456409289e-10	6.1190531941418e-09	12.6912219232344
RAB29	-1.00214564322674	9.09403808244338	-7.67722934448523	3.62734736194081e-10	6.13425438257461e-09	12.6870336889909
RIMKLA	1.08819975416173	5.76914633024308	7.67636261011737	3.63898894023446e-10	6.14863648522374e-09	12.6838447045135
CDH16	-2.28596592856636	10.3983688090608	-7.67056799747814	3.7177880992705e-10	6.26557581648340e-09	12.6625239757589
GGTA1P	1.34341442763317	8.91264122505738	7.66247048653991	3.83077857168839e-10	6.42743036508309e-09	12.6327283578856
ELF4	1.18206046817121	7.3329784789246	7.66238171925497	3.83203610134501e-10	6.42743036508309e-09	12.6324017194134
GMPR	-1.39065805478635	7.47228923158209	-7.66227820200395	3.83350311060313e-10	6.42743036508309e-09	12.6320208049652
PEG3	-1.65357865831818	5.6685801328868	-7.66167259625019	3.84209683021665e-10	6.43172429413967e-09	12.629792339676
CD14	1.45206805909543	9.8535222031862	7.66028766850901	3.86182203137105e-10	6.45833718556933e-09	12.6246961420229
PPP1R18	1.71898294684908	8.80240216727643	7.6528395667222	3.96965849725061e-10	6.63301846087912e-09	12.5972880278766
ACOT12	-1.39742154490545	4.34307662072707	-7.65218498610531	3.97927891505532e-10	6.64342987522013e-09	12.5948791775679
POU5F1P3	1.23735737726914	6.98835166346272	7.65016044617579	4.00918195779414e-10	6.68765671257575e-09	12.5874288164292
RASSF5	1.21548252000997	6.98889219731235	7.64039872448946	4.15655876446678e-10	6.91583631439295e-09	12.5515038666072
WWC3	1.26043659311605	8.78441912324056	7.63969213832579	4.16743488916047e-10	6.9280512152286e-09	12.5489033993245
PBK	1.99214100499372	6.32525996964281	7.63901041575632	4.17795534882845e-10	6.93965464720657e-09	12.5463944256206
HK1	1.11043616164034	10.4340888263074	7.63861052746442	4.1841388817778e-10	6.94404081988526e-09	12.5449226933385
FABP7	3.73855271595638	6.78526366229903	7.62351010248401	4.424479242336e-10	7.33669992806985e-09	12.4893446546679
ECI2	-1.09956066180102	10.9900371218169	-7.6219263614731	4.45047498664418e-10	7.3735680252093e-09	12.4835152579106
C1orf216	1.02520008863128	7.52185389476263	7.62046002438312	4.47468016626995e-10	7.40740973470364e-09	12.4781179418529
TRIB3	1.95392232553006	8.11069985721813	7.61976717953734	4.4861629992759e-10	7.42015145871795e-09	12.4755676889398
OLFML2A	1.87135181297087	9.00711974750591	7.61393999920805	4.58391622480795e-10	7.56269006786496e-09	12.4541182757569
CYP39A1	-1.37447804965249	6.09761123495119	-7.61243019479524	4.60959029728685e-10	7.59865179367722e-09	12.4485606603887
KRBA1	1.04967632984054	8.08909246762527	7.60601611312635	4.72027826640759e-10	7.76804819660695e-09	12.4249496888717
OLFM4	-3.53777854522504	5.34159351166137	-7.59153897096165	4.98000578843656e-10	8.18173624923357e-09	12.3716539894919
AZGP1	-3.30378822036058	9.05836312049129	-7.5835125289187	5.13012939484747e-10	8.40021187460404e-09	12.3421035543791
DIRAS3	-2.32554341881185	7.38478209981296	-7.5823417834437	5.15240253583174e-10	8.4296402088733e-09	12.3377931710407
NCKAP1L	1.03501991986781	7.15537408678522	7.57733181180544	5.24881632144163e-10	8.55880198837404e-09	12.3193473905355
SCD	1.38684776790464	8.15175841209217	7.55520200921143	5.69679885359681e-10	9.22787252318161e-09	12.2378628749728
CHODL	-1.86208841394842	6.75227982842925	-7.54124209058577	5.99891158937312e-10	9.70922106950564e-09	12.1864554094104
BEX1	-2.36035695322959	7.81369917248917	-7.53611060808705	6.1139569687306e-10	9.87910606653913e-09	12.1675576900513
SACS	1.75292355555835	7.26714773427785	7.52943289508241	6.26698599187805e-10	1.00930916549556e-08	12.142964872395
MT1H	-1.60700460763905	12.3621916660435	-7.52668677252721	6.33102581036023e-10	1.0187857625867e-08	12.1328511400971
SYNM	1.1685806196056	8.46405054478684	7.51185969795328	6.68829767932768e-10	1.07100191597077e-08	12.0782417921795
PTGER3	-1.63695482059033	6.94109681656693	-7.50802684206233	6.78389618775689e-10	1.0854233900411e-08	12.0641243919829
COL4A5	-1.04320342913816	6.29901100795555	-7.50686067555412	6.81325336179632e-10	1.08923136942258e-08	12.0598290452627
EPCAM	-2.41370840792474	11.3404522082895	-7.50624233129887	6.82887123162783e-10	1.09083843634805e-08	12.0575514847955
TIMP1	1.4060607093612	12.061470087913	7.50480441451251	6.86532837746251e-10	1.09576902441584e-08	12.0522551485585
THRB	-1.0622024130778	7.39966074862221	-7.49439278373534	7.13519128662745e-10	1.13330428863775e-08	12.013904466021
SGK2	-1.40423006735586	7.68130706258274	-7.4937482526642	7.1522423394346e-10	1.13509271135966e-08	12.0115303074189
SELENBP1	-1.37099656976289	9.15648053989115	-7.4908857596447	7.228464273754e-10	1.14533467878398e-08	12.0009861009385
AXL	1.25461265716289	8.52616105701368	7.49016655336667	7.24774278665493e-10	1.14746170127978e-08	11.998336828699
PDE1A	-2.01594731000383	7.00267110382497	-7.489015474084	7.27870505331835e-10	1.15143356775657e-08	11.9940966881449
GRAMD4	1.07192192983851	7.674266356504	7.48496079416519	7.38882935310158e-10	1.16697063111032e-08	11.9791606012492
SCN1B	1.02185655985492	7.49461789938922	7.47595957614508	7.63930519911303e-10	1.20265366990053e-08	11.9460021343146
FAM216A	1.15749835630263	8.18161343500216	7.47001112921099	7.80948387898748e-10	1.2264894553538e-08	11.9240886633993
PLEKHG4	1.04490535592671	7.1130453511574	7.46727903699673	7.88891413952628e-10	1.23698173707772e-08	11.9140237252492
HLA-DPA1	1.42327559721554	10.9975280132485	7.46120135936173	8.06852638529436e-10	1.2631239389119e-08	11.8916333408063
CORO1C	1.09330515628354	10.1879715076729	7.458312122505	8.15534269965374e-10	1.27366308297381e-08	11.8809890880294
GRB14	-2.18385494014926	8.32541148903007	-7.45350347426015	8.30191409654297e-10	1.29346197370622e-08	11.86327324196
SLC25A43	1.04491221701311	8.71341280384924	7.44698030892767	8.50497335015613e-10	1.32404668517125e-08	11.8392402876937
UHRF1	2.2415817957117	6.49039674892766	7.44523753645675	8.56006142506789e-10	1.33050915092253e-08	11.8328193783669
SLC7A7	-1.88610090776865	10.6953275110879	-7.43320114624241	8.95041194626715e-10	1.38437318981616e-08	11.7884724511061
RNASE6	1.54575329542367	9.11997157828725	7.42146513753381	9.34818791870847e-10	1.44271246619438e-08	11.7452303655769
RDH12	-1.84677627836828	7.17174122491901	-7.39398527081897	1.03502564277262e-09	1.57748853797383e-08	11.643972340186
SUSD4	-1.51695423895447	6.40257842472476	-7.39310273407991	1.03841634968354e-09	1.58142660868667e-08	11.6407202180873
PCK1	-3.90713016292208	10.6264218490504	-7.3897537586119	1.05138465111014e-09	1.59869194427919e-08	11.6283792648639
ANXA2R	1.01848108841672	7.49681260146353	7.37684082839791	1.10292457391128e-09	1.67010529107761e-08	11.580794106546
MST1L	-1.46159981427145	5.3729695742206	-7.37036353877983	1.12972317988322e-09	1.70853196957647e-08	11.5569241657494
PECAM1	1.09201355770958	9.18445385082929	7.35355315247983	1.20235548909298e-09	1.80722144066123e-08	11.4949731849557
HSPA6	1.06154165822642	7.23585427483423	7.35029535875714	1.21696332851864e-09	1.82497943679918e-08	11.4829670254385
DNER	-3.23400752505078	7.84389855887934	-7.34861623089546	1.22456176419122e-09	1.83077121114781e-08	11.4767787929699
MNDA	1.80407699235774	8.36211276188803	7.34184521924541	1.25568730702017e-09	1.87301911853846e-08	11.4518247878081
ALOX5	1.17046131455955	7.21402602265159	7.34162527299143	1.25671155334249e-09	1.87312140270059e-08	11.4510141882345
NEK2	1.38780591070133	5.56154884791044	7.33211723839509	1.30179774683303e-09	1.93443789521815e-08	11.415972529562
TMEM174	-2.02814588000331	7.99296034740479	-7.31919605828649	1.36567644265933e-09	2.0201704359338e-08	11.3683508342887
PLEKHO1	1.06020967638482	8.12881140178317	7.31659586710909	1.37890560230626e-09	2.03820134277546e-08	11.3587675693233
RHOJ	1.06824153375548	6.84673311533868	7.31198441217426	1.4026839950665e-09	2.06711325588748e-08	11.341771497262
MICB	1.3177097414863	7.23965656370394	7.30768770207107	1.42520882588668e-09	2.09872975111787e-08	11.3259353530619
C9orf24	-1.3724108827762	6.85219449646338	-7.29327331204105	1.50345330087368e-09	2.20471094198901e-08	11.272808394949
CHDH	-1.26322449801025	7.93275660759167	-7.29231360309187	1.50881299287767e-09	2.21021933186864e-08	11.2692711742609
CPNE2	1.00265773670676	9.25770899040856	7.28753610271719	1.53577993956926e-09	2.24804233125897e-08	11.2516625814695
NCAPG2	1.00947875854097	6.4341729763127	7.28708428301411	1.53835511256202e-09	2.25009608525162e-08	11.2499972900869
CADPS2	-1.32236061440003	9.25889481418313	-7.28270886852038	1.56351778986605e-09	2.28013011022132e-08	11.2338705990192
KIF4A	1.61702155761288	6.09527824450932	7.28018304609885	1.57823078195101e-09	2.29767833830048e-08	11.2245610158899
TNFSF9	1.37385970842682	7.09157500710872	7.28018167389947	1.57823881261066e-09	2.29767833830048e-08	11.2245559582825
TREH	-1.82430908264466	6.43381797968123	-7.28004007685017	1.57906771514834e-09	2.29767833830048e-08	11.2240340645015
OTOGL	-1.69855291567684	5.27570398334087	-7.27801266810514	1.59098398244783e-09	2.31330015252058e-08	11.216561500822
PTPRD	-1.42421202285225	6.20666195415745	-7.27651996262278	1.599814994276e-09	2.32269436205997e-08	11.2110597229339
PLLP	-1.37572056029505	8.84317009304117	-7.27372290742115	1.61649503627387e-09	2.34343954962779e-08	11.2007503873444
CA4	-2.06562275120194	8.11798170674428	-7.26456339140724	1.67234551181786e-09	2.40837413898824e-08	11.166990271103
CPE	2.11304209928489	9.78527977157357	7.25750974845239	1.71666861578815e-09	2.46135368467065e-08	11.1409918574243
CMPK2	1.51549760972161	8.55397882393177	7.25639027385867	1.72381041923439e-09	2.46798277699007e-08	11.136865675085
LOX	2.89006518082301	7.84972134598976	7.25601141339095	1.72623412893587e-09	2.46964882679876e-08	11.1354692630168
RASD1	-2.03137232006411	9.59183269386096	-7.24911081681184	1.7709815868213e-09	2.52445375285073e-08	11.1100348640719
SLC16A5	-1.26140078024709	7.34604743014097	-7.2453613914337	1.79578000183189e-09	2.55422990100908e-08	11.0962151143249
UGT3A1	-2.35364151561917	7.18810459315631	-7.24246389932075	1.81518165169191e-09	2.57808408501169e-08	11.0855354404651
HNRNPU-AS1	1.1145352769893	7.37881509840857	7.24179122846257	1.81971579472314e-09	2.58265239511756e-08	11.0830560869971
SLC15A3	1.05231707802758	8.01115273547435	7.23993471038133	1.83228858014934e-09	2.5967358041162e-08	11.0762132677005
GIMAP4	1.09493662215304	9.39491749536922	7.2356347612962	1.86174382045002e-09	2.63087086379382e-08	11.0603643621628
GZMB	1.79650619945506	6.79360363295576	7.23295667507073	1.88032813235072e-09	2.65521840014943e-08	11.0504933765523
MME	-2.35283531083719	9.91130805459681	-7.22560772579976	1.93228492504233e-09	2.72270197921133e-08	11.0234063701729
ATP6V1A	-1.14637735098418	10.3105657424088	-7.22514017422374	1.9356387051298e-09	2.72546829170575e-08	11.0216830538064
KIAA0226L	1.06896700645967	5.96276384562118	7.22095377996565	1.96592884846478e-09	2.76328196060783e-08	11.0062527181959
SUGCT	-1.65530239910503	8.73338018763281	-7.21302456403302	2.02460610981855e-09	2.8304051178633e-08	10.9770270366496
RNASEH2A	1.04535563446123	8.00907036452023	7.2038420803888	2.0947515873909e-09	2.91806191278334e-08	10.9431821658859
AUH	-1.28220277599797	10.6354648177515	-7.19783951372262	2.14191505494589e-09	2.97530369078238e-08	10.9210579607233
BTN3A2	1.4606201113853	8.93243492485399	7.19324369211871	2.17874252319575e-09	3.01577354905626e-08	10.9041187899966
RGS18	1.80142032647794	6.71706934939288	7.19083948633188	2.19825980830004e-09	3.0406416543882e-08	10.8952574506727
RNF152	-1.13484964969465	5.13359486775868	-7.1881503376758	2.22029763651606e-09	3.06032585623874e-08	10.8853459011126
MYH10	-1.57247001609355	8.86404393778577	-7.18731907707308	2.22715453010399e-09	3.06761973225849e-08	10.8822820811967
MT1HL1	-1.28614474573114	12.7093389572859	-7.18570687405664	2.2405137201229e-09	3.08385315410174e-08	10.876339908679
NEDD4L	-1.05527243552315	8.78166400943033	-7.17960689250326	2.29178975269528e-09	3.14779811862842e-08	10.8538570078709
RRM2	2.43375094905395	7.51417740000715	7.17594584124526	2.32312651800449e-09	3.18192031816129e-08	10.840363423901
CXCL16	1.10437808394079	9.09201657362347	7.17506997110702	2.33068687187855e-09	3.1900462771522e-08	10.837135226522
SLA	1.30685608343727	8.80727802976446	7.17145595570309	2.36214368566909e-09	3.22859248529387e-08	10.8238150747429
CLCN5	-1.49954198291967	7.63583209220792	-7.16809986330014	2.39173584875733e-09	3.25315910032225e-08	10.811445602703
NOD2	1.35499532687817	6.46254950264336	7.16347483271654	2.43312565225204e-09	3.30258052521746e-08	10.7943993261553
KIF11	1.67119872882104	5.44154957049361	7.15971673076888	2.46728447685995e-09	3.34662807933945e-08	10.7805483339107
PRR15L	-2.31661009378801	7.9517221130937	-7.15137479193338	2.54483211507019e-09	3.43950026034902e-08	10.7498032773652
CSF2RB	1.59224825299774	7.51511319690984	7.15122114247194	2.54628310090124e-09	3.43950026034902e-08	10.749236990675
VSIG1	1.30597930761134	5.10808915965357	7.14899685998717	2.56738103938511e-09	3.46322562780098e-08	10.741039246111
OR7E14P	-1.46947799423056	7.32558847976572	-7.14753924504286	2.58130170357882e-09	3.47721741513023e-08	10.7356671239289
PLVAP	1.96413448389911	9.85882639159563	7.14604075147426	2.59569150493773e-09	3.4942001028008e-08	10.7301443555454
CXCL12	-1.52122394121992	9.61412402926152	-7.14342406156181	2.62101189005373e-09	3.52195122301912e-08	10.7205004574963
CTD-3092A11.2	1.07348965208118	7.97292400126702	7.14022900009477	2.65226423062493e-09	3.55813681863441e-08	10.7087250145695
ARHGAP9	1.13226204166614	7.03300626022646	7.13885782770616	2.66579036850499e-09	3.56895431849028e-08	10.7036715616266
PWAR6	-1.49054405612281	6.93373731183924	-7.13272872645999	2.72710057593538e-09	3.64356995830494e-08	10.6810829375634
IL4R	1.09248854757702	8.51807033143675	7.13250582855193	2.72935664507336e-09	3.64410015282274e-08	10.6802614590547
RP4-680D5.8	-2.44391507072794	7.13740664821948	-7.12223492833175	2.83536477498804e-09	3.77791635552451e-08	10.6424090177762
PRKAR2B	-1.25486602283164	7.78564965276141	-7.11870970593051	2.87269094641977e-09	3.81986041722032e-08	10.6294173390309
ACADSB	-1.66779671415166	8.78830261347657	-7.11553003095768	2.90677984910563e-09	3.85995156114298e-08	10.6176992150221
C1orf116	-1.25919496276253	6.18766180653364	-7.1137231105833	2.92633164295056e-09	3.8781296955595e-08	10.6110401724421
SIM1	-1.62919184874499	6.5652957073051	-7.1131027143628	2.9330749406523e-09	3.88434248897196e-08	10.6087538333477
IRF6	-1.22615603475235	6.83037337863807	-7.11191376062972	2.94604155677651e-09	3.89888011565291e-08	10.604372205464
KIF20A	2.15922979280157	5.99107098327914	7.11138980962701	2.95177390559104e-09	3.9038305364092e-08	10.6024413031817
BCAT1	1.28242019946454	6.65499848882017	7.10678859197355	3.00259576243592e-09	3.96302201641373e-08	10.5854846707357
PRR16	1.11885792858694	5.99820315773945	7.10601168704429	3.0112628851808e-09	3.96941732146448e-08	10.5826216022911
IL1RL1	-1.38393027741639	7.37388302761136	-7.10190560307368	3.05748760659593e-09	4.02193000599197e-08	10.5674898609154
PHGDH	-1.36960343217524	8.43181878160619	-7.10006842399633	3.07839907010849e-09	4.04672178230224e-08	10.5607195417367
ERMP1	-1.11138790022736	9.22185497987996	-7.09871666788213	3.09387657370321e-09	4.06434187966373e-08	10.555738110726
FCGR3B	1.73649968619927	7.89353900923852	7.08814180534493	3.21767537101179e-09	4.21285486117776e-08	10.5167687527286
MS4A4A	1.56075951682698	8.32553290895792	7.08661947470083	3.23590057498494e-09	4.22824341798032e-08	10.5111589200575
GLIPR1	1.45141049394999	7.52219215844358	7.08183645923063	3.29383699036095e-09	4.29535628816198e-08	10.4935335362821
DNMT3L	-1.39188100627536	5.78644974207973	-7.07879302638634	3.33124091769386e-09	4.33836026490364e-08	10.4823186391301
CP	3.68926758741272	8.11864005458266	7.07780103177314	3.3435241507444e-09	4.35016827451384e-08	10.4786632119322
SAMHD1	1.0089953379656	7.65870367438787	7.07400828115974	3.39090651888393e-09	4.40435836780152e-08	10.46468731146
SLC25A33	-1.27160638677247	8.58406286346066	-7.07372435791931	3.39448044025365e-09	4.4056238766923e-08	10.4636410900549
COL5A2	1.8126914085602	8.27932110961715	7.06742992462576	3.47468730724608e-09	4.49530503115664e-08	10.4404471470069
RP11-369C8.1	-1.66331456439604	4.81314682076398	-7.05025424316683	3.70332335791906e-09	4.76280431858357e-08	10.3771601780577
GK	-1.71383505743817	8.44548355682587	-7.04732594809423	3.74377846121262e-09	4.80852279421804e-08	10.3663707293966
CSDC2	-1.1445873465739	7.49293436760366	-7.04554984223473	3.76853081447748e-09	4.83081778703457e-08	10.3598266375459
IL13RA2	-2.03836323911553	7.33675832356334	-7.04524036142904	3.77286054662251e-09	4.83320697475825e-08	10.3586863548771
SUSD2	-1.49732286722385	7.9724721370728	-7.0440349197423	3.78977252722482e-09	4.85170094928847e-08	10.3542449154511
PRAP1	-2.27794072984881	9.5405939631483	-7.03985964229504	3.84893862755769e-09	4.91780945893942e-08	10.338861303071
IFI44	1.14682983576606	7.17523960468162	7.03321711056176	3.94497679381757e-09	5.02740865792096e-08	10.3143877353537
FREM2	-2.79794814521137	7.85444152907705	-7.03243174247735	3.95648896436814e-09	5.03553140919582e-08	10.3114941896276
MSC	1.28159591561273	6.75957583758685	7.02733100467502	4.03207917733622e-09	5.12840700037572e-08	10.2927016791218
TSPAN1	-2.25758556453823	10.9894927878369	-7.02711847025926	4.03525997526088e-09	5.12912422276999e-08	10.2919186530286
TCF4	1.27145467957205	8.87553268201474	7.02513248791386	4.06510379533218e-09	5.16370929283932e-08	10.2846018674467
MAD2L1	1.12438034113956	6.52271786620116	7.01521713102982	4.21743856711544e-09	5.33301909132017e-08	10.248072502968
ZMYND12	-1.54755211320269	7.03349836747082	-7.01071368247306	4.28849975314952e-09	5.41938073254226e-08	10.2314817893492
GJA1	1.29643982270539	11.0540217021059	7.00975905816892	4.30371615201383e-09	5.43085704905189e-08	10.2279649951437
BICD1	1.13873968246339	6.91749610923963	7.00971973232586	4.30434414952323e-09	5.43085704905189e-08	10.2278201207873
MAP3K7CL	2.05569100981966	7.70331978246014	7.00646315593316	4.35666790321988e-09	5.48554330753752e-08	10.2158231543938
ISG15	1.14712618482336	9.76465572654665	7.00501289114084	4.38017367399923e-09	5.51035969257926e-08	10.2104805536462
AGXT	-1.05973824092072	5.80210650569352	-7.00202892993785	4.4289370858524e-09	5.5645619796607e-08	10.1994881148416
CTSV	-1.41421418756769	8.5199788222573	-7.00184584796834	4.43194659379168e-09	5.5647759922048e-08	10.1988136750269
MYO6	-1.06413475433713	9.38201674884269	-6.99645814494221	4.52143118616507e-09	5.66986892187046e-08	10.1789666477539
C21orf62	-1.10604613656315	7.25379681717143	-6.99626098658661	4.52473984013905e-09	5.67039008099267e-08	10.1782403726906
NEURL1B	1.25520125514102	8.77477393101284	6.99482114280352	4.54897638343724e-09	5.69401083360502e-08	10.1729364207246
KIT	-1.74263713574806	8.07351521914059	-6.99436536270405	4.55667543362398e-09	5.69947916394575e-08	10.1712574715632
PC	-1.45885964247234	8.09851348426427	-6.98726105453636	4.67837968568142e-09	5.84052495792075e-08	10.1450879478479
KCNS3	1.39052941019111	8.19960210171491	6.98097085468889	4.78884722215974e-09	5.96703150377183e-08	10.1219180710369
AHNAK2	1.77354853319493	6.81627415196138	6.98035929205431	4.79972550810991e-09	5.97678652852314e-08	10.1196654274881
SLC6A3	2.68252877822097	8.07850796420908	6.97276207953532	4.9369399052049e-09	6.13206730937998e-08	10.0916822899281
NUF2	1.70542526113169	5.19542009073452	6.97111813657503	4.96714369343414e-09	6.16567551559906e-08	10.0856272340964
MPDZ	-1.02056507912086	9.07446438794012	-6.96887237350972	5.00870334898985e-09	6.20939820621132e-08	10.0773556106008
CISH	-1.00911796979734	8.97211514637974	-6.96735444212942	5.03699059632393e-09	6.23657711231517e-08	10.071764803667
RP11-196G18.24	1.10078693886918	5.90566799300509	6.96086789707743	5.15968038991429e-09	6.38445300772222e-08	10.0478742527146
SERPINH1	1.17183253898992	9.7907540397568	6.95926977367854	5.19036400084054e-09	6.41836810198578e-08	10.0419883485123
SH2B3	1.08824681913111	8.3656140013296	6.95434366982991	5.2860964715314e-09	6.5244011865249e-08	10.0238457971116
SERPINA4	-1.29642244513653	6.90506167141507	-6.94599440259643	5.45240175543254e-09	6.70013005683246e-08	9.993097121898
GPR65	1.65901543580152	7.65981671165048	6.941902156499	5.5358130802976e-09	6.79836694071635e-08	9.97802675759395
GAL3ST1	2.29055384684909	9.56797732809624	6.93704491702901	5.63647401388077e-09	6.91332231990383e-08	9.96013966559419
NCF2	1.59208495308026	7.73221489186315	6.93028743388436	5.7795656209728e-09	7.07996788569168e-08	9.9352556986207
SGOL2	1.04940504805209	6.16426655304675	6.9244333752006	5.90645869206522e-09	7.21736847658842e-08	9.91369938715956
TOX2	1.84645349571951	6.10976997139642	6.92168701450733	5.96694489675334e-09	7.28219925133035e-08	9.90358678393231
RAB37	1.151258361354	6.45332580381604	6.91012388227471	6.22847775133862e-09	7.57308709219833e-08	9.86101121263326
LUM	-2.69152694378528	7.84509409102064	-6.90775520718032	6.2834496156258e-09	7.62275112434518e-08	9.85229013300899
OIP5	1.07772855638905	6.58168721060744	6.90758784801135	6.28735195202082e-09	7.62275112434518e-08	9.85167394885138
DEGS1	1.09240341717274	11.0560416974394	6.90752707184167	6.28876967758477e-09	7.62275112434518e-08	9.85145018289908
GZMA	2.17856506851939	7.58903029389994	6.90026356339269	6.46052673916844e-09	7.80199162585961e-08	9.82470804002265
NKIRAS1	-1.10740617994384	8.27364597434709	-6.89702685890474	6.53856603306957e-09	7.8768220189406e-08	9.81279186225445
TNFSF4	1.12927323588271	5.79658605509253	6.89409714167092	6.61001554915983e-09	7.95800397810397e-08	9.80200611605783
DAK	-1.00409612861964	7.38075975830744	-6.88379000767208	6.86764206810825e-09	8.24790346414962e-08	9.76406222951907
TTK	1.7814800253345	5.01458045728229	6.88188113018096	6.91644409464114e-09	8.29127243149641e-08	9.75703534789549
SLC44A4	-1.96861568275924	7.34666151035161	-6.87440545607994	7.11092472757592e-09	8.50360736183575e-08	9.72951716156921
FJX1	1.0849104883295	7.99354731698809	6.8726002513033	7.15870063307949e-09	8.54509941585615e-08	9.72287237883185
LRRC19	-3.31697129404726	8.60497270073777	-6.87099271102092	7.20151512034693e-09	8.59097360674375e-08	9.71695525647253
LRP4	1.01856573613328	6.57462254559459	6.8679819843311	7.28239091613159e-09	8.66635470286456e-08	9.70587340419251
AKR7A3	-1.7725206201147	10.1592851664876	-6.86781122488219	7.28700504936035e-09	8.66658367521012e-08	9.70524488221824
FAM171A1	-1.43632034741197	9.7205145274387	-6.86717665635903	7.30417749337428e-09	8.6817391673824e-08	9.7029092045955
SMIM24	-2.21915186534736	11.1677904094424	-6.85612709547566	7.60976217075047e-09	9.01761418057492e-08	9.66224056731333
KCNK3	1.79759827700615	7.71005120597948	6.85044015527318	7.77198456891268e-09	9.18762952657952e-08	9.64131079691603
C3orf67	1.18115391908144	4.99612092455866	6.85001833835745	7.78415381400765e-09	9.1964686410217e-08	9.63975841308349
OCLN	-1.35732810771739	7.61813292674143	-6.84757617707838	7.85498424742894e-09	9.26339899215447e-08	9.63077079909304
ABCA17P	2.04245493109889	7.36037336226152	6.84479442490402	7.93644862396678e-09	9.35384203426031e-08	9.62053364479421
CEP55	2.36903107015502	6.13226541762911	6.84234531917323	8.00886973724494e-09	9.42785866966971e-08	9.6115208597797
CD97	1.05211464722622	8.72403762534638	6.83757812778434	8.15173627541715e-09	9.57721066260101e-08	9.5939779727312
ANXA3	-2.78341436635074	7.80551714878663	-6.83503193546723	8.22908250613169e-09	9.65230503412216e-08	9.58460847324167
CD93	1.08452536071076	9.76235689303633	6.82814396849547	8.44201365011491e-09	9.89022519678734e-08	9.55926308906521
SPAG5	-1.27505606260719	8.47479291238597	-6.81915123147887	8.72831538827681e-09	1.02012511395483e-07	9.52617512856839
CCNA2	1.28092562314462	6.25841372489648	6.81076703434443	9.00397249716778e-09	1.04983855410166e-07	9.49532859477364
CDH9	-1.16337310064505	4.53580485545282	-6.80463585611347	9.21104336875843e-09	1.07206918068685e-07	9.47277267639063
RENBP	-1.41058214487585	8.69600534525563	-6.80398544411832	9.2332871644932e-09	1.07402034673037e-07	9.47037995729898
PBX1	-1.26084430585243	8.76920849948737	-6.79369214935325	9.59254198780593e-09	1.11184992880542e-07	9.43251515924788
PABPC4L	1.51787872437931	6.82269683874787	6.78454580559039	9.92346253903307e-09	1.14613945648231e-07	9.3988725918373
SLC5A12	-2.83038631540803	8.26721933469221	-6.78307390688017	9.97777163873997e-09	1.15173335759307e-07	9.39345885028681
CHSY3	1.21696128385403	6.29426452910048	6.76525145243244	1.06594107393318e-08	1.2243109315344e-07	9.32791285312466
BCHE	-2.68092641502056	6.02525320487034	-6.75366155442241	1.1127434714937e-08	1.27393528278484e-07	9.28529472836982
SLAMF8	1.57853552201819	7.06569071543539	6.7482171570484	1.1354319745561e-08	1.29688034389858e-07	9.26527646048806
HOXD8	-1.31605810839714	9.63929525364334	-6.74671972253729	1.14175284767354e-08	1.3033404667677e-07	9.25977080799015
THRSP	-1.01061539450681	5.85160970442775	-6.74259381357951	1.15935122076008e-08	1.32188969906327e-07	9.24460143058918
TCIRG1	1.02546534597668	8.18653702584275	6.73610946159331	1.18755801158315e-08	1.35090754654845e-07	9.22076230921195
ALOX5AP	1.33465626193565	9.12321960670685	6.72288757511756	1.24721356497402e-08	1.41302808517288e-07	9.1721584375727
CCL5	2.070200034768	8.51983676458269	6.72007429862284	1.26028774496455e-08	1.42416339502787e-07	9.16181769744336
CYP4A11	-2.44782092320918	8.304708663366	-6.71428940862786	1.28760344996464e-08	1.4487386693058e-07	9.14055523863252
PTTG1	1.64127982616996	8.40880663821386	6.70793073514159	1.31831082966133e-08	1.48073881153937e-07	9.11718542889379
TM6SF1	1.20732545960848	7.46410379872181	6.69943337293985	1.36049056611517e-08	1.52287921735336e-07	9.08595802501221
XAF1	1.03957684394322	7.72617790414364	6.69295056480058	1.3935739344187e-08	1.55458446867425e-07	9.06213608369592
GPR155	-1.38518194323657	7.6643162751089	-6.69159493590228	1.40059291404241e-08	1.56152566070713e-07	9.05715487412519
DUSP5P1	1.57014646752304	4.50294183798754	6.6888038010781	1.41515576386476e-08	1.57596891884939e-07	9.04689920122886
SMIM6	-1.14251781823674	8.24887585559635	-6.68197475259954	1.45142701104877e-08	1.61452720865811e-07	9.02180816209488
RAB31	1.03794949744874	9.78828221995897	6.68054121921702	1.45915800655214e-08	1.62128667394682e-07	9.01654138762227
AHR	1.04747097455481	9.50644846923743	6.67851973111666	1.47012971322859e-08	1.63255197616319e-07	9.00911463376432
PPARGC1A	-1.13632582027378	6.7651501043957	-6.67719942337997	1.47734014848383e-08	1.63963006286993e-07	9.00426404776637
TRIM71	-1.43402967306626	6.17705743257827	-6.67653703393324	1.48097085988988e-08	1.64180027453856e-07	9.00183057096878
UNC5D	-1.50534123265183	5.62008777092474	-6.67208553046758	1.5056026949067e-08	1.66440004625896e-07	8.98547721239944
SLC39A5	-1.48700639556134	8.60154684464588	-6.66792416012897	1.52899874024827e-08	1.68835917233049e-07	8.97019051639927
MPEG1	1.45476348118218	8.51032019260551	6.66572012642871	1.54153687092765e-08	1.69885390269759e-07	8.96209436938165
ENTPD5	-1.27290842683654	8.09091336048139	-6.6580727989218	1.58584137528165e-08	1.73839434874275e-07	8.93400492647753
CA2	-1.71898657390225	11.6135198368371	-6.65706388581422	1.59178057755673e-08	1.74392953158815e-07	8.93029928366066
PNPLA3	-1.34433777272992	7.03100646568839	-6.65424181906672	1.60851147400914e-08	1.7593094246975e-07	8.91993434991043
H2BFS	1.14845219879292	9.0426317912264	6.64246923798757	1.68022036513218e-08	1.83059028107787e-07	8.87669985681599
SLC41A2	1.33402193209324	7.7556498271738	6.64032037672225	1.69364963202414e-08	1.8421494332782e-07	8.86880893126929
ANLN	2.13129092027087	5.78462049966684	6.63580992280047	1.72218697422239e-08	1.86904012706306e-07	8.85224662200704
TNMD	-1.75741388170621	6.0597873384578	-6.62752124517831	1.77588566090114e-08	1.92305850572721e-07	8.821813313818
SLC13A1	-3.8381751774506	8.55433475478577	-6.61002329001955	1.89479582610483e-08	2.04504395328495e-07	8.75757770839304
PSMB10	1.02519214055411	9.64152311508964	6.60517447827378	1.9291301490789e-08	2.07866690060178e-07	8.73978027924979
HLA-DRA	1.03016493600131	12.5411985521687	6.60381093290934	1.93889671092699e-08	2.08804261176752e-07	8.73477564012138
ST6GALNAC3	-1.75591827691198	7.8961021428476	-6.57929005422318	2.12319467627046e-08	2.26782646620714e-07	8.64479283311164
PLCD4	-1.16759562268963	6.50180785890781	-6.57168256753322	2.18384881253477e-08	2.32248707138804e-07	8.61688257497964
SVIP	-1.00853533572452	8.49397210465831	-6.57059495571072	2.19266035523818e-08	2.32933024187904e-07	8.61289261309315
ADORA2B	1.29266929659861	6.6009595890451	6.57033210544562	2.19479521371955e-08	2.33033511315835e-07	8.61192834254332
PLEKHA5	-1.30676713185368	8.05977851785716	-6.56446087204859	2.24302520155499e-08	2.3763942675934e-07	8.59039060814178
CYFIP2	-1.24049256226406	10.0205821644496	-6.55926462320705	2.28659142269726e-08	2.41993476700142e-07	8.57133053180855
NTN4	-1.91496092489773	9.93734736112667	-6.55397316487614	2.33182323261989e-08	2.46647249645708e-07	8.55192276050326
SLC23A1	-2.17749786582857	8.59939906516819	-6.55078654756099	2.35949206230744e-08	2.4917049795919e-07	8.54023578412186
THSD7A	-1.61819438503508	7.76071282403409	-6.55020650967346	2.36456353767281e-08	2.49571595790991e-07	8.53810854603542
FGR	1.24511056043945	7.34072322487365	6.54607567210422	2.40099666614006e-08	2.53144349953444e-07	8.52295960997465
OGFRL1	1.02711298759662	8.25277636576714	6.54450520057802	2.41499430741668e-08	2.54106632688636e-07	8.51720050512815
NLRC5	1.28192581672185	7.66677742628791	6.54373937770753	2.42184958931073e-08	2.54658004026236e-07	8.51439219286117
BTBD16	1.08814629275064	5.47914428635291	6.54290728013708	2.42932013037114e-08	2.55207159933954e-07	8.51134088562964
CDCA7	1.11109643784123	5.36075951677545	6.53863479349793	2.46804181318039e-08	2.58820864303562e-07	8.49567427127563
MEST	-2.37918010801501	9.11862777235561	-6.53773132858049	2.47630845167217e-08	2.59271611393026e-07	8.492361524888
CLMN	-1.20007176891798	7.74641590134839	-6.53028730012207	2.54548024734749e-08	2.65945697484066e-07	8.46506820088654
TNFAIP3	1.15742402654434	8.83939630313703	6.52991543007944	2.54898584583183e-08	2.66170072340457e-07	8.4637048338292
CCL4	1.91249004980663	8.15494245370583	6.51181901318733	2.72552553273505e-08	2.83096451730826e-07	8.39736872915228
RP1-93H18.6	2.1448826679556	7.83924548892284	6.50485746833394	2.79664066304782e-08	2.89715417525038e-07	8.37185495836494
TCEAL7	-1.25754541929073	6.85713186246175	-6.49850799963768	2.86311500592646e-08	2.95042345510823e-07	8.34858697792025
FAM24B	-1.20530337218325	7.72183753737556	-6.49545573373965	2.89562834624787e-08	2.9807938858434e-07	8.33740265568078
ARPC1B	1.01044657448488	10.5154830702962	6.49473162770567	2.90339553183049e-08	2.98565332759064e-07	8.33474942051126
NMB	1.56808180960097	9.38147128554596	6.49274830893577	2.92477629237197e-08	3.00448717665045e-07	8.32748240262291
STRIP2	-1.32850475586811	5.51010099090993	-6.48296618164785	3.03254888132955e-08	3.10218987860434e-07	8.291643571303
BDH2	-1.49845297051508	10.0595379783363	-6.47991571351017	3.06695975589315e-08	3.13085475080759e-07	8.2804687762917
CENPE	1.26953746102932	5.39744085519129	6.47601343776905	3.11154748501178e-08	3.17141605336615e-07	8.26617440390712
SNAP25	1.0643191009285	6.29669004154602	6.46769538829403	3.20875850273235e-08	3.26540325304019e-07	8.23570789467618
CDKN3	1.3556714218089	6.85288000811643	6.44908693553925	3.43733156453046e-08	3.48174153306445e-07	8.16756687269671
EOGT	1.11425883045815	7.88345235077947	6.43979024269233	3.55753320100275e-08	3.59235707056434e-07	8.13353245281962
EDIL3	1.26992038859514	7.51317253446616	6.43602833977247	3.60735503801329e-08	3.63891707385797e-07	8.11976207441127
C5AR1	1.55568153061388	8.06507237073912	6.43473797145729	3.6246040674434e-08	3.65255731217947e-07	8.11503892281556
RAB42	2.26843850237333	8.37974912745602	6.41626976231911	3.88067708658663e-08	3.89060209192316e-07	8.0474518743101
GZMH	1.53460944895599	7.38354632888636	6.40785262893583	4.00329060000527e-08	4.00124914635917e-07	8.01665594961398
LAMP3	1.57049532005388	6.69880887160156	6.40743844596521	4.00942271884859e-08	4.00533564166321e-07	8.0151406978969
SCIN	-2.01362786318392	8.84045827559753	-6.40708176937812	4.01471093574255e-08	4.00857536121008e-07	8.01383583780364
VCAN	2.36476462032482	8.93840866440077	6.40545623802244	4.03889980018748e-08	4.03067393501398e-07	8.00788913188455
CCDC109B	1.44449673849134	7.4865208141642	6.4041907674551	4.05783122695791e-08	4.04750595666031e-07	8.00325977003097
KIF14	1.49974283601572	5.427412715493	6.40353926873273	4.0676120905475e-08	4.05519821845021e-07	8.00087649228551
TOX3	-2.4181631068003	7.76776036663673	-6.40047364570836	4.11395212361322e-08	4.0930691179096e-07	7.98966239530839
CRTAM	1.57928958340516	5.02421406175205	6.40013178186102	4.11915223474072e-08	4.09616356169042e-07	7.98841189308147
SLC7A11	1.06452461971165	5.31479168542546	6.3849226367028	4.35724802722074e-08	4.30453938173017e-07	7.93278684148789
GLYAT	-2.40890089831859	9.48979645387905	-6.38247494574787	4.39682664379086e-08	4.34145099336528e-07	7.92383634746222
CST7	1.58746078594853	7.83915562637528	6.38012157738068	4.43521774624517e-08	4.37274989066425e-07	7.9152311726336
CYP4F3	-2.82198940286974	7.91709391521321	-6.37829831160148	4.46519057317633e-08	4.40008724154128e-07	7.90856461314364
ELTD1	1.35934734802697	9.79175023227031	6.377056012201	4.48572833913707e-08	4.41588525600636e-07	7.90402242830988
GDA	-1.57354083129377	8.10067882482453	-6.37403917742921	4.53599540700539e-08	4.45926824284011e-07	7.89299252791551
FRK	-1.13201155588478	7.63807340918441	-6.37271144355514	4.55829580675464e-08	4.47160149211166e-07	7.88813838878207
PODXL	-1.42667314492807	11.061396779459	-6.37242814561846	4.56306815153238e-08	4.47404381040693e-07	7.88710268018729
RP11-503C24.6	-1.36312791175059	6.89893233691194	-6.37010952250982	4.60231445084779e-08	4.50801415475346e-07	7.87862625024555
BUB1B	1.68067348968264	6.78023825311825	6.36939028504103	4.6145568564917e-08	4.51774797139047e-07	7.87599693992047
GABRB2	-1.10716786191309	5.50354342169844	-6.3583813825775	4.8060429840165e-08	4.69583462047474e-07	7.83575656748958
P2RY8	1.37269101281237	8.16178904949199	6.35005607048863	4.95608899871181e-08	4.83040001863508e-07	7.80533142038951
BAZ1A	1.15957331524207	8.12702699915176	6.34662713584482	5.01923652428059e-08	4.88708573650768e-07	7.79280177821676
VLDLR	1.10202465536139	8.87101513975948	6.34409948125332	5.06629850009997e-08	4.9255679862083e-07	7.78356606777828
WDFY3-AS2	-1.68466714871155	8.0749242527926	-6.34184270783514	5.10868820879509e-08	4.96185772509334e-07	7.77532053219286
TCF19	1.47590053428687	6.98873645211722	6.33323297882437	5.27367717140583e-08	5.10187919839854e-07	7.74386689411061
FGF13	-1.13090240658194	8.292955161409	-6.33242753935883	5.28938069000286e-08	5.11329452395016e-07	7.74092470090831
CTGF	-1.8256584809285	10.6629001442839	-6.33098178074433	5.31768530926266e-08	5.13684731698118e-07	7.73564360917953
DDC	-2.44771773805287	9.54691943547911	-6.32907551191997	5.35523633971067e-08	5.17057301765168e-07	7.72868060567927
FOXJ3	1.21778806183885	7.78787849544885	6.32134813649002	5.51017971497843e-08	5.3044952069537e-07	7.70045782184697
FN1	1.17265022306701	8.88075478068004	6.3198212238666	5.54132033955249e-08	5.33132263145356e-07	7.69488161421008
CHSY1	1.11928191385213	10.3467334565223	6.31699568357227	5.59940875741757e-08	5.38246256230429e-07	7.68456336802535
PFKFB3	1.0955605755365	10.4457623292144	6.31068485170528	5.73134777448616e-08	5.48775849437854e-07	7.66151988993582
KCTD3	1.01927983929876	9.78089951477177	6.30929594769674	5.76079833033793e-08	5.51057331745356e-07	7.65644884708345
RGN	-1.63857326725344	9.06495425081346	-6.30589140758459	5.83362771117891e-08	5.57208104966406e-07	7.64401914404504
MT1X	-1.55893753202993	12.492525594679	-6.30484896621363	5.85611024129811e-08	5.59083101458563e-07	7.64021345959615
TMEM133	1.16250931909975	8.47374228286004	6.30211552884995	5.91547334341659e-08	5.64200863897641e-07	7.63023479924419
ETNK2	-1.5902616473542	7.77043603818651	-6.30192673662635	5.91959546692609e-08	5.6431941221669e-07	7.62954561832726
FBXL16	1.07179759342458	7.04794463460668	6.30044677317073	5.95200849812249e-08	5.66857952202142e-07	7.62414315111816
NAPEPLD	-1.0413741983344	7.37525557797838	-6.29691805555385	6.0300065088161e-08	5.73172296667291e-07	7.61126261301538
CDH5	1.1301465660816	8.17004727141224	6.29531969770445	6.06567033366254e-08	5.75724641839156e-07	7.60542861289333
KCNE3	1.09483254333873	8.46849784243625	6.29470069853011	6.0795382774566e-08	5.7676161780324e-07	7.60316932391706
AGXT2	-2.36205536737367	10.2062491028626	-6.29367419126272	6.10260557246024e-08	5.78669904306825e-07	7.59942273720186
AGAP2-AS1	1.12191126474763	7.02347865888223	6.29243567320324	6.13055311796318e-08	5.81038883520688e-07	7.59490245922045
IL2RB	1.23895401584913	7.52437657932708	6.28620039153849	6.27320160933634e-08	5.92838724893887e-07	7.57214715855775
SLC26A9	-1.96217386375934	7.69879530220866	-6.28455219092762	6.31145758718719e-08	5.9616659618732e-07	7.56613267786211
ZNRF3	-1.09246955283269	9.18492617322779	-6.28343529441009	6.33751352944869e-08	5.98051348951345e-07	7.5620571162001
IRF7	1.14848248003602	8.6648765698216	6.28253926095743	6.35849437972264e-08	5.99742492023888e-07	7.55878755938587
SLC17A1	-2.22194811839016	6.94719659861537	-6.2792843258793	6.4352930059741e-08	6.05820090860194e-07	7.54691111054068
C1orf210	-1.70420613729219	7.65965926434288	-6.27910021075695	6.43966460296772e-08	6.05861973065571e-07	7.5462393464166
CGREF1	1.0793837920898	7.1750082538016	6.2729076532526	6.5884341643532e-08	6.1845454799484e-07	7.5236467636488
RERGL	-2.23408214713689	7.13849137124333	-6.27249005628859	6.598588744124e-08	6.18815020980049e-07	7.52212334100398
ICAM1	1.05624741465014	8.30421470620092	6.26371688712195	6.81556201424526e-08	6.3763730539001e-07	7.49012159045814
SLC16A9	-2.60671729257824	10.5869132326693	-6.25810012876458	6.95818644129633e-08	6.50049829596797e-07	7.46963683656286
P2RY13	1.43114450651723	6.59159470561143	6.25734504041617	6.97758531284235e-08	6.51551558512196e-07	7.46688317477586
PM20D1	-1.1365712623308	5.90046423906016	-6.25361552260534	7.07419226359016e-08	6.59316064509592e-07	7.45328305384316
GGACT	-1.42471619728379	6.78760181025109	-6.25232572785453	7.10791112998439e-08	6.6214381248904e-07	7.44857994345393
HSD3B7	1.38615194621834	9.2030462282697	6.24982212145048	7.17381973746313e-08	6.67332068601222e-07	7.43945119423875
ADAMDEC1	2.61510330122924	5.67238884277026	6.24925184467661	7.1889173931307e-08	6.68419264256934e-07	7.43737190357849
DLGAP5	1.68060268430387	5.45046285990879	6.24109444626024	7.40837215301941e-08	6.86883024954466e-07	7.4076322161428
VSIG4	1.56850344657158	9.12699669798447	6.24108579154923	7.40860849188851e-08	6.86883024954466e-07	7.40760066644276
RP11-250B2.6	-1.0596362622699	5.46974556317573	-6.24036086640423	7.42843107444518e-08	6.88077736574317e-07	7.40495806276544
HIBCH	-1.46737094573828	10.2605362823815	-6.23387925884553	7.60802854040263e-08	7.02389822853941e-07	7.38133238700734
GIMAP2	1.20649230185663	8.25757177726472	6.23134800423574	7.67933406411522e-08	7.08305636031334e-07	7.37210687617925
ARNT2	-1.30446223052212	7.74908510254226	-6.23094754038422	7.690675916917e-08	7.0901809958407e-07	7.37064738124391
COL4A2	1.10777336706222	10.2894401805738	6.22321126211158	7.91308214435532e-08	7.2781046470842e-07	7.34245520154186
CCL21	-1.14688302773126	7.75906341294665	-6.2220616429258	7.94667371461654e-08	7.29530701669715e-07	7.33826626513646
RP11-247L20.4	-1.29307708000737	9.41161344706608	-6.22072159094852	7.98600882504019e-08	7.3245565264758e-07	7.33338358539765
RARRES2	1.31135451866082	11.1934161076723	6.21683407404157	8.10122044990591e-08	7.42675027213077e-07	7.31921974041237
DCDC2	-1.77758948173264	6.7130184319904	-6.21639625411768	8.11429899542234e-08	7.43526228659551e-07	7.31762466431836
SASH3	1.27999873760463	7.33845833117649	6.21546528938435	8.14217862553838e-08	7.45213917062246e-07	7.31423300810973
LCP1	1.24166994376887	8.99242382294602	6.2036337356003	8.50491279178638e-08	7.76053494967472e-07	7.27113551157068
SAMD13	-1.08291351642129	6.82620411876735	-6.18528735747056	9.09942429338236e-08	8.27220390307488e-07	7.20433235103316
TBX15	1.13236694749876	6.0805194733229	6.18310981200096	9.17267719599929e-08	8.30797010358531e-07	7.19640549060716
MAL2	-2.54946387478908	9.55572339095314	-6.17452877620856	9.46709977481667e-08	8.55881713959441e-07	7.16517247290366
FYB	1.02812518119624	7.29345834953065	6.16842272972316	9.68230986282816e-08	8.7252079683417e-07	7.1429520540529
MT1E	-1.34666735922072	12.0674852704151	-6.15968420405913	9.99879468722187e-08	8.99799705553483e-07	7.11115795177087
CD2	1.69539148476729	7.59771625083355	6.15292803428917	1.02505189456188e-07	9.19080583173289e-07	7.08658140706552
CENPW	1.14035758164158	7.16081604164077	6.15292689252086	1.02505620143715e-07	9.19080583173289e-07	7.08657725408789
ACADM	-1.08667490882126	11.097139784191	-6.15236027055306	1.02719578392758e-07	9.2015710077608e-07	7.08451628367604
PTHLH	3.44937410300211	6.04683559198919	6.14811126590642	1.04338233323856e-07	9.33002991953855e-07	7.06906239163586
CBR3	1.03277679906182	7.58241550538051	6.14664458774959	1.04902832483049e-07	9.3753380628384e-07	7.06372839720057
KIAA1462	1.15237716346981	7.16002446868568	6.13314350220798	1.10244911939027e-07	9.81289861037664e-07	7.01463766043892
FGF14-AS2	-1.05797715912438	7.00031132218138	-6.13029596319318	1.1140571031968e-07	9.8982408080949e-07	7.0042861193338
TRIM59	1.52745271991773	6.68249361869837	6.12975069737851	1.11629370347187e-07	9.91361875308046e-07	7.002304028074
UPK1B	-1.80844287085639	6.9086239334189	-6.12707753150349	1.12732340870241e-07	1.00025073836882e-06	6.99258724930374
FABP3	-1.70588550589701	9.37767208369567	-6.12409753523209	1.13974690676768e-07	1.0094459725552e-06	6.98175599556796
OR51E1	1.460797683735	6.38903662319516	6.1219994100897	1.14857549470241e-07	1.01542984646672e-06	6.97413056607421
LMNB1	1.28362826173148	7.07093281409421	6.11764244071292	1.16712676802796e-07	1.03136540366763e-06	6.95829698869718
SLC7A9	-2.193045704092	10.0078097438887	-6.1135633937265	1.1847646130302e-07	1.04506689538217e-06	6.94347512233949
CDCA5	1.0205970267072	6.91543535124811	6.10911515718551	1.2043010451763e-07	1.05978873494739e-06	6.92731365036532
UGT2B28	-1.33051545435928	11.0017131288418	-6.1087813328783	1.20578004027178e-07	1.05978873494739e-06	6.92610086982495
DOC2A	1.12532304689172	6.91042462931043	6.10681621268847	1.21452310435922e-07	1.06651670454483e-06	6.91896183480016
IFI27	1.06215570613435	10.4165283643955	6.10569317487978	1.21954791310164e-07	1.07010818821435e-06	6.91488215461185
ITM2C	-1.05100852927182	10.0053281404947	-6.09021450372325	1.29094685561533e-07	1.12378743288449e-06	6.85866557058946
APOL1	1.75113627840773	9.0702877068067	6.09015929267796	1.29120882594688e-07	1.12378743288449e-06	6.85846509491056
MAP9	-1.07908545672743	7.3904187151979	-6.08836169221713	1.29976717559682e-07	1.13023232660593e-06	6.85193803671702
ACOT13	-1.02066040050959	10.389912844077	-6.07803929148237	1.350014948947e-07	1.17080942475049e-06	6.81446403561062
DEPDC1	1.1414769908218	4.91334026571279	6.0721507181572	1.37953968825318e-07	1.19377385826766e-06	6.79309137894997
CSF1R	1.08834667990412	8.57778807229721	6.06793807342673	1.40105445240608e-07	1.20972102498499e-06	6.77780375815671
CEBPB	1.19673600469421	11.5885635544982	6.05962978991248	1.44446869236438e-07	1.24446533496008e-06	6.74765861698206
CYS1	-2.11865273972807	10.1326840745652	-6.05324738487449	1.47872521035416e-07	1.27118482995358e-06	6.72450616502742
TRBC1	1.74701429411369	8.80206806280155	6.05215880374186	1.48464806630443e-07	1.27515784835963e-06	6.72055772384306
ENPP3	2.68965463943851	9.39135484416384	6.04041604652195	1.55005755284866e-07	1.326107727448e-06	6.67797314403577
C12orf56	-1.54499362659896	5.86507509004509	-6.03695260679582	1.56989085906149e-07	1.34073467701984e-06	6.66541598266214
BTN3A3	1.15107420726693	7.80850761373402	6.03539893527707	1.57886966366622e-07	1.34722879442133e-06	6.65978336369192
GOT1	-1.17318491464534	10.2756527664492	-6.03442430576379	1.58452816092063e-07	1.3514687534397e-06	6.6562501148293
PRSS8	-1.48149212792619	8.34304405858766	-6.03177513662068	1.60001072347278e-07	1.36289483616108e-06	6.64664681108049
SHC1	1.00417463781798	9.48372264702645	6.03134677076855	1.60252830613908e-07	1.36326192709748e-06	6.64509404630087
PRKCZ	-1.00991563776933	8.76074227524347	-6.02731824087792	1.62639811383281e-07	1.38116997535196e-06	6.6304921867665
MYADM	1.35607326688326	9.31811996923323	6.02470642367516	1.64206205996608e-07	1.39326477815304e-06	6.62102631402137
CKMT2	-1.94129389412096	8.02875141830841	-6.01817714894813	1.68187915642481e-07	1.42396680198385e-06	6.59736589659617
PSAT1	-2.65941175301493	9.37221863243827	-6.01746165830351	1.68630029430291e-07	1.42709351331334e-06	6.59477342883529
NCAPG	1.3535053963474	5.60029455409758	6.01074722599073	1.72835662988113e-07	1.45890568241473e-06	6.57044751393677
GPT2	-1.22653536935854	7.26454644325614	-6.00979456110032	1.73440753280628e-07	1.46338302380555e-06	6.56699648349947
LGSN	-1.3694388328116	3.97079164268954	-6.00891217512425	1.74003082830816e-07	1.46749587929604e-06	6.56380012911907
CDH3	-1.66592664682069	7.78065078438674	-6.00780045959818	1.74714139530058e-07	1.47222576732121e-06	6.55977317562413
MTCL1	1.39926906457495	8.30311602694436	6.00596770988417	1.75892679736712e-07	1.48088338609947e-06	6.5531347313202
AFAP1L2	-1.12314026970255	7.27192563267416	-5.99728507053235	1.81584234002298e-07	1.52487188793703e-06	6.52169028386674
GCM1	-1.0702589129477	5.14828853894652	-5.9945517930502	1.83413506421178e-07	1.53891469428728e-06	6.51179339832685
LYZ	1.87731224533637	10.1112050739255	5.99327738215031	1.84272664432595e-07	1.54546179840773e-06	6.50717919192566
PCDH17	1.45770742558097	8.29078972427963	5.98701040194514	1.88556136478632e-07	1.57733686512215e-06	6.48449128972445
GRAMD1C	-1.72282989942853	8.62823032077346	-5.98497493105801	1.89968545167108e-07	1.58779679542657e-06	6.477123384937
BIRC5	1.13708991585992	6.49523142302193	5.98215962051046	1.91939418268004e-07	1.60358593267386e-06	6.46693343519896
TMEM2	1.00914271304262	8.52977617572316	5.97655914609961	1.95920647457724e-07	1.63336652070242e-06	6.4466653630682
C5orf46	2.56501763159175	7.27262710501506	5.9702671159596	2.00491393115648e-07	1.66840969114383e-06	6.42389888301328
ACSM3	-1.6434943849666	8.8302423861004	-5.96768872485593	2.02394875169655e-07	1.68233229572742e-06	6.4145708080313
AC012065.7	-1.01515428382919	7.75295165240054	-5.96748600113648	2.02545293612933e-07	1.68238882510027e-06	6.41383742924112
SULT1C2	-1.54032679300932	8.64024921411557	-5.96367002150501	2.05397507512398e-07	1.70253468581865e-06	6.40003353402284
TM4SF4	-1.02789418000255	6.31352561674845	-5.9628072986877	2.06047849005663e-07	1.7061841320283e-06	6.39691296326127
FMO3	-1.63142347537755	7.07951317225951	-5.96191273011092	2.06724356300692e-07	1.70889809510483e-06	6.39367729472405
ZBED5-AS1	-1.07289347988763	9.07893659833727	-5.95171580256078	2.14593300927751e-07	1.76872527257524e-06	6.35680150123661
COCH	-1.47260735234207	6.78080986091993	-5.94969728835823	2.16185895638794e-07	1.77960670076454e-06	6.3495032773881
MELK	1.15069227339742	7.3161962063261	5.94206693022452	2.22312957812827e-07	1.82391543454643e-06	6.32191901475735
SLC27A3	1.13123509617987	8.34040323600613	5.93768907792408	2.25905832217512e-07	1.85029432154753e-06	6.3060959212661
COL6A2	1.24988989591638	8.35369012926138	5.93724763518603	2.2627130584449e-07	1.85251361510108e-06	6.30450051997151
EPHX2	-1.67948252828015	9.5727674259906	-5.92469749049598	2.36910874924813e-07	1.92674404503167e-06	6.25915335422867
RBP7	1.50255603030794	9.25111760432619	5.92003881964547	2.40985497327747e-07	1.95744539893238e-06	6.24232514136138
NAMPT	1.0530072065733	8.88868122607589	5.90904492584236	2.50879015408372e-07	2.03275266721955e-06	6.20262314483325
CD163	1.4601550521414	7.85092521072966	5.90738304256417	2.5240924001933e-07	2.04430624147887e-06	6.19662291781961
RAB33A	1.19619730564971	5.66257647577076	5.88540079772413	2.73543434810794e-07	2.20182805843596e-06	6.11728838307482
TRIP13	1.42201068064851	7.21105292456614	5.88403409138434	2.74913938635504e-07	2.20832508084257e-06	6.11235790209625
LGALS9	1.12867117970004	8.02454761803529	5.88250601364589	2.76454332976783e-07	2.21887998621824e-06	6.1068455428562
CDK1	1.22432957039809	7.06348485664393	5.88040211657324	2.7858921340942e-07	2.23509970643661e-06	6.09925646710477
BDNF	1.196186807928	6.26996721912268	5.87448708331192	2.8467941922401e-07	2.27743535379208e-06	6.07792305510765
PLAGL1	1.00260837483104	8.95848100189071	5.87187315147333	2.87412684462116e-07	2.29586010789983e-06	6.0684969560724
REEP1	-1.03033996644127	6.74613497495175	-5.86745374650478	2.92093209919223e-07	2.33103701727067e-06	6.05256212759786
SLC4A4	-1.64114330912095	8.63208626559468	-5.86665295418083	2.9294937568335e-07	2.33691809661932e-06	6.04967501843032
DCLK1	1.7153537237755	5.82314954006968	5.86584412282096	2.93816664314258e-07	2.34097830104043e-06	6.04675900957327
PLEK	1.12990732623555	7.82454295429535	5.86165054936489	2.98354340384869e-07	2.37134836640042e-06	6.03164163553276
NLRC3	1.02084539853584	6.63165972397873	5.86048186906924	2.99631260428063e-07	2.37764077100811e-06	6.02742907453867
AASS	-1.08370870246658	6.96212496660908	-5.85642301733186	3.04108298722604e-07	2.41121466624718e-06	6.01280013082111
ALDH1L1	-1.057019502663	8.29273004406949	-5.85192171011991	3.09151037319492e-07	2.44921597876396e-06	5.99657898292373
MIR100HG	-1.28697729202817	6.5631099155764	-5.84873624172598	3.12769711674947e-07	2.47588301648988e-06	5.9851012536967
SHROOM3	-1.05238450227297	7.37718803907833	-5.84804668938036	3.13558555685243e-07	2.48012416926181e-06	5.98261686549235
CCDC110	1.00305877290475	5.04059546067976	5.84016151016142	3.22720723181276e-07	2.54540288706359e-06	5.95421177715039
TK1	1.05044101792831	7.50806311617047	5.82643924985601	3.39302919790822e-07	2.66546582280565e-06	5.90479907837481
KL	-2.22658346935597	9.77985192036475	-5.82560796894467	3.4033417596408e-07	2.67249593305127e-06	5.90180650857178
CCNB1	1.33158413709051	6.78730006759289	5.8211179554969	3.45958306682639e-07	2.71448471216162e-06	5.88564427804917
BCL2A1	1.66920463084815	6.77057716149074	5.81943785205771	3.48086402136147e-07	2.72899739274739e-06	5.87959727888254
PLAUR	1.07175490367972	7.68124456043666	5.81503590756503	3.53723883464232e-07	2.76765992650657e-06	5.86375567198808
SCN4B	1.93047725994876	7.03195528064161	5.80298312432604	3.69627321539604e-07	2.88222085660062e-06	5.820393791312
QPRT	-1.6795904164484	9.35675326751601	-5.80234381100652	3.70490412964096e-07	2.88732091216552e-06	5.81809430580977
ZNF667-AS1	-1.74655959114345	8.3689104587177	-5.79839176404377	3.75870334739022e-07	2.91995979424686e-06	5.80388079828323
NUPR1	1.29369644593209	10.2555390627188	5.7969543468432	3.77846245866999e-07	2.93414675871362e-06	5.79871166652468
RAB11FIP3	-1.11628063328376	8.85521863175542	-5.79633001416931	3.78707675492012e-07	2.93967146124492e-06	5.79646657623657
CLIC2	1.20472835631034	7.95136339201964	5.78747033332061	3.91143919326596e-07	3.02661698334042e-06	5.76461306708874
ECSCR	1.01764511256612	8.75271650762786	5.78390604044485	3.96260564821957e-07	3.06258165240945e-06	5.75180129268837
EDNRA	1.06304983067918	7.02032349648391	5.77680071661636	4.06659319078666e-07	3.13429911676833e-06	5.72626660627009
RP11-96D1.11	-1.16244072399836	7.15759945709933	-5.77177067151512	4.14184010514638e-07	3.18446993311064e-06	5.70819417693435
SPARCL1	1.12669141285804	11.5335042811386	5.7715349630606	4.14539984736028e-07	3.18501909087657e-06	5.70734738757711
LY96	1.49385913929417	8.67962665206599	5.76753280476652	4.20630680026146e-07	3.22801931421788e-06	5.69297070648176
APOLD1	1.79570864214378	10.2177663724933	5.73882004499068	4.67007223993233e-07	3.54831402910297e-06	5.58989417856623
C19orf33	1.85157890725759	8.94789764970637	5.72120659755168	4.97928531393232e-07	3.75939877323088e-06	5.52672179121303
TPD52L1	-1.6497195679012	9.01266403333862	-5.70932325645315	5.19928092814904e-07	3.91644528023525e-06	5.48412654809904
TINAG	-2.06064576952911	8.05705426438017	-5.70747868347245	5.2342823663266e-07	3.93827003378124e-06	5.47751663018061
SAMD5	-1.13183191917159	6.83457554096006	-5.70398402626391	5.30123621606396e-07	3.9840578924407e-06	5.46499511185252
GAPT	1.17832073013727	5.06927380759434	5.69172433001686	5.54289941615022e-07	4.14659650979177e-06	5.42108239436556
TMEM125	-1.00592298422833	8.26440167254548	-5.6851341869634	5.67728275828012e-07	4.23097878563841e-06	5.39748659736726
QRFPR	1.74544202967754	5.14538513216781	5.68302415668103	5.72098801138708e-07	4.25869217710546e-06	5.38993308085563
CD200	1.21223089697299	8.45553152510288	5.67768937112813	5.83298032107061e-07	4.33711738592504e-06	5.37083853583101
TUBB2A	-1.13806911110229	10.3683158082244	-5.66369039326942	6.13729160845335e-07	4.53927983115795e-06	5.32075319899488
CCR5	1.45374646440867	7.8095633040919	5.6612609046067	6.19168279145411e-07	4.57605515507167e-06	5.3120640575999
RACGAP1	1.07814748402636	8.10143722763572	5.65086742726515	6.42981260074476e-07	4.73419710648375e-06	5.27490171503227
TPX2	1.64959905771614	6.43635157129704	5.64383804922301	6.59598550391957e-07	4.84740299235988e-06	5.249777330952
PPP1R16B	-1.0097681550311	7.69725159179126	-5.63484761760464	6.81472889056649e-07	4.99695795941276e-06	5.21765497277466
PRF1	1.03643359077567	7.95237297176184	5.63358863139409	6.84592889453596e-07	5.01608247973476e-06	5.21315768844363
TLR1	1.10873165996562	6.98236928092649	5.62652119935037	7.02371679044097e-07	5.13100443878655e-06	5.18791640616045
TAGLN2	1.05911465495689	10.7809780341913	5.62216618177389	7.13554010963525e-07	5.19912959661156e-06	5.17236641706885
NEFL	2.35996140677993	7.43345728048952	5.62155263410774	7.15143512906288e-07	5.20877475026505e-06	5.17017593022395
CRYM	-1.43515329177118	9.56002263475517	-5.61607394568099	7.29493331833518e-07	5.30737539121639e-06	5.15061857529264
TRIM63	-1.55929281627907	6.70008279357962	-5.61444529247363	7.33813822189874e-07	5.33089359337343e-06	5.14480566858157
PTGFRN	1.18783184628197	8.18600650006234	5.61086139575916	7.4341059921857e-07	5.39461227126397e-06	5.13201569569159
CLEC5A	1.18261786587238	5.01730380938576	5.60995836595572	7.45848221334641e-07	5.41029797859325e-06	5.12879334654967
RP11-548H18.2	-1.22169561203501	7.67394228522008	-5.60220053194447	7.67118235221164e-07	5.55020945379653e-06	5.10111586996893
C4orf6	1.31822161156941	4.76742057594856	5.59964055296589	7.74267974209015e-07	5.59367943033421e-06	5.09198480534104
AQP11	-1.3500853897544	7.68503859087424	-5.59814948033496	7.78462736300799e-07	5.61984148489711e-06	5.08666685799413
PTGS1	1.60049283445147	7.67035134221181	5.59131890765497	7.9796825244129e-07	5.750065348474e-06	5.06231004954476
EOMES	1.6094388757239	6.7590318884661	5.57898243711719	8.34430178017192e-07	5.99957134597834e-06	5.01833925703485
CLDN10	-1.85029416478162	10.409587734733	-5.57484570243593	8.47022233559694e-07	6.07673344720718e-06	5.0036002999978
CRYL1	-1.23219469314851	11.2009731556605	-5.57268669314387	8.53668677837204e-07	6.11769875159385e-06	4.99590898697577
FSCN1	1.2185318368966	7.54657913200806	5.56843341219837	8.6691363915005e-07	6.20962540516719e-06	4.98075923303096
FAM101B	1.09615234707266	9.4828402155955	5.56836452168626	8.67129833364418e-07	6.20962540516719e-06	4.98051387663173
CDHR2	-1.06707495759816	8.08030133053229	-5.56694886223814	8.71584330071633e-07	6.23469082824964e-06	4.97547212099763
TNFRSF11A	1.03579676183897	5.32400138243219	5.56442442532186	8.79583960625775e-07	6.28503303983419e-06	4.96648236856182
UCHL1	-1.31004840692377	7.49184610430456	-5.55761017454223	9.01542076038307e-07	6.42787365964016e-06	4.94222147844296
RPL22L1	1.05281460722937	9.8578524050789	5.54738754749666	9.35504413562233e-07	6.64584505466465e-06	4.90584022709424
UBE2C	1.56207098950038	7.91993140998494	5.54709033245637	9.36510551707666e-07	6.65058217879357e-06	4.90478273227865
CYP2J2	2.37725977189088	8.27056859856241	5.53619081326922	9.74156716859929e-07	6.89543938261272e-06	4.86601239686469
GAS2	-2.10129528536183	7.2126561139301	-5.52931559237142	9.98669306373782e-07	7.05366429006347e-06	4.8415671176537
FOXM1	1.24518390228969	6.12872190269819	5.52834763907427	1.002169049723e-06	7.07328533473925e-06	4.83812614518982
ZNF542P	-1.22938948444297	7.30477835855319	-5.51983915292512	1.03345913984394e-06	7.2575417918098e-06	4.80788626124201
GPX3	-1.2027910328081	13.5672812194958	-5.51715216857123	1.04353990467361e-06	7.32083866500624e-06	4.79833906951582
RRAD	1.19936019965036	7.67411073393567	5.5161550429021	1.04730551608951e-06	7.34425335075289e-06	4.79479647317515
PPP1R1A	-2.03426664839332	8.22283091757198	-5.51091758603937	1.06730640090011e-06	7.4738140255956e-06	4.77619160802172
AIFM1	-1.14645697457877	10.3049712214973	-5.50873969641594	1.07573415199729e-06	7.52745068873506e-06	4.76845654951563
AMDHD1	-1.93346843080941	7.46496103500766	-5.50420199281385	1.09350565237348e-06	7.63545093926622e-06	4.75234294520499
PDGFD	1.29976656764932	8.47573444152886	5.48809245807737	1.15897433013093e-06	8.06386115391063e-06	4.69516620181548
PRIMA1	2.14740147372022	6.95395050696039	5.476546655871	1.20826614649045e-06	8.37116170774576e-06	4.65421533807292
ANO4	1.06915489999307	5.53596940855775	5.46990482034346	1.23755505556171e-06	8.54990450793425e-06	4.63066866070744
ARG2	-1.6626003561443	9.19364183570181	-5.46921098519582	1.24065490377642e-06	8.56830025159194e-06	4.62820932522111
SERPINB9P1	1.16967483979243	6.42171810670429	5.46651307272255	1.25278149976507e-06	8.64494915954107e-06	4.61864724831091
TEX11	1.53864189390523	5.927962961698	5.46636630170043	1.25344455769948e-06	8.64494915954107e-06	4.61812709239043
GK3P	-1.37890247278369	7.74966232571045	-5.46573429256645	1.25630371030592e-06	8.66111597678367e-06	4.61588729854558
OAS1	1.07406977484702	8.20674298575432	5.46197023915413	1.27346599064466e-06	8.7609453901844e-06	4.60254925192911
CD72	1.11036959418095	6.68062777009095	5.45725020721085	1.29531494902589e-06	8.90500631389245e-06	4.5858272577724
MGP	-1.04685938845448	9.20220271684755	-5.44929576349805	1.33297746858349e-06	9.13509034413863e-06	4.55765556680012
SPINK13	2.60966329376521	7.07742787006868	5.43870727323583	1.38479574058491e-06	9.45714164301887e-06	4.52017285402336
IL17RB	-2.14300608418322	9.46306265664761	-5.43817797030439	1.38743767124244e-06	9.4700224189781e-06	4.51829968463333
COX4I2	1.03825454686304	7.44568152812691	5.43813583775544	1.38764818302577e-06	9.4700224189781e-06	4.51815058242225
SLC16A6	1.2415918197412	6.65848007319829	5.43004530945325	1.42866243547286e-06	9.72284157474584e-06	4.48952516062761
KDELC1	1.08484404678938	7.85101686361332	5.42310235631616	1.4648127225274e-06	9.95849093358898e-06	4.46496960697744
ITK	1.47675472606808	6.48201161074964	5.41913066267131	1.48589729108547e-06	1.00773657111679e-05	4.45092668286883
WT1	-1.84707605456532	7.44180411970011	-5.41860438510848	1.4887135537851e-06	1.00929732460007e-05	4.44906611491967
SLC6A1	1.22425862469344	5.59666298358495	5.41802080484628	1.49184262725405e-06	1.0110690004903e-05	4.44700302268927
SLC38A4	-1.21258627925348	4.45394840997548	-5.415150395353	1.50732819819554e-06	1.01944902293418e-05	4.43685637562754
IFI44L	1.45216308429775	8.58813586202133	5.41194037566153	1.52483411718686e-06	1.02915801297736e-05	4.42551104920434
SMAP2	1.02117184982071	8.99483157303466	5.40414446684163	1.56819006587002e-06	1.05732801138811e-05	4.39796559214629
INMT	-1.04283559094067	7.97908717244859	-5.40366777565289	1.57088028606932e-06	1.05877763435209e-05	4.3962816572046
FKBP10	1.44722096107236	7.9548863103375	5.40122426385784	1.58474206796217e-06	1.06775333558125e-05	4.38765050092913
DPY19L2P2	1.25264770528784	6.9408796683088	5.39779016410999	1.60442783080503e-06	1.07879195484661e-05	4.37552220969973
GPX8	1.1970194497331	8.04979831423009	5.39452526806944	1.62336759278621e-06	1.08965769926745e-05	4.36399355647762
APELA	-1.30661367436335	4.19336714772744	-5.39239395938405	1.63585035956849e-06	1.09615955718093e-05	4.35646879032691
L1CAM	-1.16284767354511	6.9137289876854	-5.38429612770956	1.68414872194123e-06	1.12582929570423e-05	4.32788654219886
GBP5	1.41002624447427	5.99201538672265	5.37447377675758	1.74462639474776e-06	1.16268879078735e-05	4.29323412761388
ANK3	-1.25853786117093	8.13723527183815	-5.37425673591588	1.74598668856513e-06	1.16319983330648e-05	4.29246863404577
AOX1	-2.02558828095596	9.05993566693143	-5.36401040212048	1.81141125321785e-06	1.2023463708627e-05	4.2563405449368
GZMK	1.95557334907746	8.07789004931994	5.35394241841133	1.87805369395983e-06	1.24064214363373e-05	4.22086102223969
SOX11	1.12865471216577	5.20927800865288	5.348553087117	1.91471596796323e-06	1.26088493661654e-05	4.20187712490833
DUXAP10	1.07600273473057	4.373151870584	5.34849283387037	1.91512982464666e-06	1.26088493661654e-05	4.20166491505417
SLC14A1	-1.41396795544539	6.13489638089669	-5.34772748888018	1.92039438172233e-06	1.26392645674136e-05	4.1989694580172
ARRDC2	1.00326612218518	8.5541021751627	5.34020618974886	1.97289714583303e-06	1.29413601266156e-05	4.17248639478722
PNCK	1.51759724976856	7.53397786434174	5.33585862279902	2.00388927628588e-06	1.3113933160335e-05	4.15718333751763
ITGAL	1.12750678110628	6.87972294459678	5.33521686436521	2.00850465425262e-06	1.31397500745498e-05	4.15492471828003
KCNN2	-1.02443454970058	6.01096059695389	-5.33095024704234	2.03945712078598e-06	1.33244531891351e-05	4.13991075025268
AGR2	-1.61885402478689	6.10334903567109	-5.32736107983493	2.06585930622638e-06	1.34834640033424e-05	4.12728347003439
STK39	1.26882407007077	9.35979619785016	5.32465853308887	2.0859618618175e-06	1.35990537500316e-05	4.1177771481409
PMEPA1	1.11038869899182	9.30088130292556	5.32203487147525	2.10566233002002e-06	1.37158463504129e-05	4.10854969307715
CDC7	1.00427582844391	6.45506502406088	5.31411401236964	2.16625921014599e-06	1.40778118431238e-05	4.08070022344863
APOBEC3B	1.51198316133481	6.47018507933903	5.31116927801867	2.18922349191149e-06	1.42082054441938e-05	4.0703498294762
IL18R1	1.00559928651161	6.51099718336375	5.31091386003309	2.19122663676359e-06	1.42164985370958e-05	4.06945214711423
C8orf4	-1.82778698656562	8.9715555538601	-5.30156951866708	2.2657676367494e-06	1.46274854019395e-05	4.036619875919
FMO1	-2.34847061382031	10.6950023681147	-5.28971273684723	2.36396193946189e-06	1.51967888484797e-05	3.99498523289392
HGD	-1.14880895190564	8.8140657277157	-5.28961288888157	2.3648064279522e-06	1.51967888484797e-05	3.99463474144919
RAB17	-1.29901856066042	9.13130526108176	-5.28726503892118	2.3847499631103e-06	1.52998688304294e-05	3.98639378227036
UNC5CL	-1.11483391008007	8.7687895323416	-5.27728059710394	2.47143150858324e-06	1.57836616383941e-05	3.9513609164281
APOD	-1.72050474021919	7.56042359858141	-5.27159702359986	2.52215519348026e-06	1.60709498674295e-05	3.93142781707636
KCNJ13	-1.05309369184189	4.80421064689842	-5.26614115245685	2.57181237479527e-06	1.63183951265741e-05	3.91229955262741
SYBU	2.12718013313158	7.54745452768019	5.26375511511731	2.59383111878573e-06	1.64272140586685e-05	3.90393604467073
C9orf66	-1.94496473127401	8.09675186541925	-5.26083077854615	2.62107113592337e-06	1.65930253493834e-05	3.89368730306298
CHI3L1	-1.27226075165606	7.37581051550371	-5.2573767910821	2.6536084775448e-06	1.67668362862277e-05	3.88158460966231
CLEC14A	1.07564607279089	8.33879453407782	5.25715419536757	2.65571899183514e-06	1.67747638543244e-05	3.88080472428354
PCDHB14	1.48733770402764	6.64374433261793	5.24905446755529	2.73365215952811e-06	1.72115587300838e-05	3.85243356775746
G0S2	-1.57603481774159	9.38044543365458	-5.24802111597756	2.74375561758958e-06	1.72640802904513e-05	3.84881500077758
DPYS	-2.38765338016809	10.1682584465225	-5.24599202775674	2.76370204056433e-06	1.73450400240348e-05	3.84171023560315
HLA-DPB2	1.38082466994474	4.80758926812285	5.24389672997628	2.78444940787561e-06	1.74640666861958e-05	3.83437454505834
BEX2	-1.44507831072196	10.0015471407227	-5.23959689535506	2.82750805627276e-06	1.77227879446582e-05	3.81932359904059
C10orf99	2.37557338162136	6.101891831072	5.23931628901355	2.83034076987426e-06	1.7734871831693e-05	3.81834151233143
PANK1	-1.64873714110161	9.17851063389166	-5.22140360983214	3.01708005453798e-06	1.87681768528574e-05	3.75568380412968
PMCH	1.06694826798631	6.25799277586651	5.21742690658052	3.06015692283364e-06	1.89987569488563e-05	3.74178271901102
LCK	1.09838096912611	6.96372368997781	5.21219561902888	3.11774852354171e-06	1.93025873240577e-05	3.72350121275597
ELMO1	1.34301690007006	7.20624839535921	5.19973770841757	3.25923589772959e-06	2.0084081398143e-05	3.67998884453409
SLC27A2	-2.49067193897108	9.35801293939482	-5.18583550759846	3.42460670972099e-06	2.10282868140763e-05	3.63147151998648
FKBP1B	-1.06580861947091	7.84331071201409	-5.17577882639893	3.54936212993884e-06	2.17174204093615e-05	3.5964009246211
BHMT	-2.21220553379128	11.5249464816844	-5.1596571237144	3.75876113940656e-06	2.28723124285528e-05	3.54022619453785
WASF3	-1.14419236414442	8.41763545777498	-5.15578246304798	3.81087485048359e-06	2.31463114562995e-05	3.52673383206954
C4orf19	-1.13807105751809	7.85579473864104	-5.15348684842063	3.84208572573913e-06	2.33214246591784e-05	3.51874160591651
GBP1	1.00362145068649	7.96328250355304	5.14178510060323	4.00513689364876e-06	2.42211302423683e-05	3.47802002487024
GPRASP1	-1.22836143167164	7.62259815156243	-5.13653921961185	4.08042754436306e-06	2.46156909416793e-05	3.45977454635959
CYP24A1	-1.95096893820764	5.82688572844362	-5.13255580285144	4.13852850456155e-06	2.49201716403706e-05	3.445924130281
KIF2A	1.2452578420063	7.23624244979306	5.12881735283587	4.1937973053666e-06	2.52065094097471e-05	3.43292872710824
AGR3	-1.71519983810747	4.32744789968648	-5.12840102121246	4.1999971093221e-06	2.52360341332658e-05	3.43148169264968
FLRT3	-1.89845433202568	9.40024222869152	-5.12310995367649	4.2795797904878e-06	2.56670024154103e-05	3.41309507032519
FAM110C	1.20306195635332	10.0010220551892	5.11586879592643	4.39090536059976e-06	2.63024893238861e-05	3.38794213710279
FAM198B	1.04404790067969	8.07190911047448	5.11170825933089	4.45615438628907e-06	2.66282396253859e-05	3.37349548003877
DHDH	-1.39350721567057	7.77892043969563	-5.10600103481135	4.54721541623735e-06	2.70980304524938e-05	3.3536846957055
ZNF165	-1.10507565134893	6.54150807237878	-5.10580059530471	4.55044659240277e-06	2.7109043529208e-05	3.35298907062059
CALCRL	1.07638653801715	7.0871634172503	5.10291086825875	4.59728231900676e-06	2.73465048414362e-05	3.34296130249358
ZNF204P	-1.61312646480313	7.41954677778086	-5.10057402733475	4.63550388148867e-06	2.75237431315292e-05	3.33485353412572
CENPV	-1.03018253145597	6.86504151103298	-5.09676773711106	4.69843074381406e-06	2.78299312719116e-05	3.32165014522202
PP7080	-1.41430385079095	8.51220300583278	-5.08120710697998	4.9645480115965e-06	2.92647040683583e-05	3.26770781059389
TREM1	1.55000928324054	6.24753743688402	5.0791622739166	5.00060364643569e-06	2.9450670513864e-05	3.26062340066481
P2RY12	1.2374939078006	5.38639292499777	5.07640138478204	5.04969440375915e-06	2.9704084727995e-05	3.25105973511348
SLC19A2	-1.0147768592735	8.59859510866603	-5.07086049041646	5.14965138307748e-06	3.02285615778133e-05	3.23187157415022
GPR34	1.59566189290131	8.92047138448191	5.06130362689593	5.32665147496428e-06	3.11741919705285e-05	3.19879304498477
APOM	-2.06710446764067	10.1936694435608	-5.05532123513748	5.44048243024607e-06	3.1792920582237e-05	3.17809757365509
AIM2	1.49026192324453	5.98542530669253	5.05298771754707	5.48552984677417e-06	3.19703791248212e-05	3.17002730914306
PXDN	1.19417377504591	8.98001822411684	5.04376136983217	5.66726216372408e-06	3.29609312786326e-05	3.13813149123629
GLTPD2	-1.07468038347658	6.71987227446655	-5.0378523038846	5.78675193582677e-06	3.35662438420257e-05	3.11771431763764
FLJ35700	-1.39105674450098	4.76108052351718	-5.02965282771052	5.95667211351391e-06	3.44804410587338e-05	3.08939713680648
IGFBP2	-1.99166257213167	8.9977966291299	-5.02577900980669	6.0386483256197e-06	3.49240210038791e-05	3.07602440399371
FGFBP2	1.27443662015441	5.40919079114259	5.02459914518137	6.0638358962497e-06	3.50490072446164e-05	3.07195213615501
CD52	1.30127085232065	7.97821544108232	5.02288649918261	6.1005811686542e-06	3.52406103464846e-05	3.06604158845557
PLAC8	1.57665176851933	7.54358696961192	5.01249171413567	6.32834880957874e-06	3.6416804658762e-05	3.03018320004769
MUC1	-1.44897900224235	8.98018718651821	-4.99948613202404	6.62512909793121e-06	3.79352995382564e-05	2.98535558318639
NPY1R	-1.63359317165411	7.84304209184116	-4.99898323020158	6.63687577395236e-06	3.79803693925449e-05	2.98362301464124
LIME1	-1.1047116379643	8.95632474385919	-4.99496550261352	6.73145928305261e-06	3.84094911056277e-05	2.96978360369592
CD8A	1.69520557641131	7.89372509810934	4.9934412123083	6.76768915935166e-06	3.85937467335736e-05	2.96453409394115
EDN1	1.14286698305311	8.33957074063155	4.98995451558363	6.85128459745625e-06	3.90137065979496e-05	2.95252840018943
VAV3	-1.2192361803307	9.1881587449796	-4.9785314229133	7.13233357545815e-06	4.04378762160775e-05	2.91321651097172
LURAP1L	1.00776556996245	7.75388098140456	4.97242986720695	7.28706596589952e-06	4.12316665507017e-05	2.89223166738028
MXRA7	1.03949864417368	9.01717753047954	4.97104869320451	7.32254722389529e-06	4.13965750182716e-05	2.88748273926775
HCP5	1.0397459428089	8.03214724658481	4.93317827300587	8.36437148652198e-06	4.680036572533e-05	2.75745911396202
ABHD14B	-1.07590717570263	9.51434211075741	-4.93060508192715	8.44022157692779e-06	4.71440133678497e-05	2.7486375885127
EMCN	-1.89182817008658	9.92188853960711	-4.92568213723925	8.58722315875437e-06	4.78968622400642e-05	2.73176526772925
PRSS16	1.27150235352954	6.52479475843331	4.91633605238401	8.87325408601325e-06	4.93378099534354e-05	2.69975075616226
ECHDC3	-1.10904500122816	11.1533880370659	-4.91471516545251	8.92380364715599e-06	4.95907432617685e-05	2.69420078957981
ZNF385B	-1.83180709754438	7.28565554889164	-4.91442846095612	8.93277430828689e-06	4.96124614458552e-05	2.6932191753426
FOLR1	-1.76040175291169	10.7725857862246	-4.91208314244167	9.00649001386177e-06	5.0007706592547e-05	2.68519011086122
SEMA4B	1.03954326125304	9.42826622340229	4.88999835940549	9.73059446014159e-06	5.36633796901449e-05	2.60965431902765
GPC4	-1.01156866887895	8.70192071672788	-4.88432311098819	9.92571963414431e-06	5.46012082035443e-05	2.59026409432898
COL21A1	1.64884140163356	7.36225857206495	4.87151163452804	1.03804335386135e-05	5.68949936680159e-05	2.54652327387731
MT1M	-2.00364976577784	7.82595524389432	-4.87084465223721	1.04046584458943e-05	5.69991353857086e-05	2.54424726022063
MUC20	-1.05958533590612	7.37509741407321	-4.84486746180262	1.13925676601858e-05	6.18842607844773e-05	2.45569497416889
PTN	-1.01487795016915	7.40342372286247	-4.83858760381159	1.16448754755568e-05	6.31459474712994e-05	2.43431511519386
LAIR2	1.41345305505997	6.21052676817239	4.80061967291717	1.3291297806896e-05	7.13333617237573e-05	2.30528167050268
THEMIS	1.09865696332843	4.7379050066539	4.79551005807925	1.35296117884757e-05	7.24932725681036e-05	2.28794699652738
IL20RB	2.32641556776701	6.32132680409417	4.79385961481091	1.36074804222424e-05	7.28507556066517e-05	2.28234931695853
PCDHB6	1.11569794880463	6.28634392070452	4.79317490365268	1.36399142053054e-05	7.29446980693006e-05	2.28002725773615
PROM1	-3.04940841753941	9.07674824097489	-4.78574089772157	1.39969677222283e-05	7.45693306212761e-05	2.2548247336265
RAD54B	1.13199496980464	6.84744521813229	4.78306839275504	1.41275536735157e-05	7.51017228101189e-05	2.24576826216826
SMIM3	1.38903672207067	9.92155532603594	4.78115596492657	1.4221732537061e-05	7.55621019911887e-05	2.23928873379832
CXCL11	2.03742427590228	5.78585905534871	4.77594095028069	1.44816881195765e-05	7.67753379074378e-05	2.22162486295825
AQP3	-1.02688473121996	10.0218978747552	-4.76601664027356	1.49893190952199e-05	7.91035687308318e-05	2.18803116709203
PNMAL1	-1.32465306056616	8.19915315461159	-4.76446054054563	1.50704798605725e-05	7.9489075690856e-05	2.18276630278761
SPC25	1.05432361993281	4.96302281118246	4.75984856898017	1.53135624306027e-05	8.06626776779931e-05	2.16716631003071
BIK	-1.11120811323586	6.8182295802426	-4.75868434156904	1.53755300996739e-05	8.09170099150339e-05	2.16322926340862
ABCA12	1.01208356046476	4.10239927477756	4.73723376756862	1.65622402541001e-05	8.64040215545282e-05	2.09075930193783
IL2RG	1.0794628098957	6.60872140630942	4.73610574720275	1.66270696030377e-05	8.66960798668631e-05	2.08695196922014
GXYLT2	1.2065924350384	6.71576470706127	4.73166456029567	1.6884737326603e-05	8.79460142443316e-05	2.07196547891868
NPR3	-1.62370021658113	8.94432125601833	-4.72898323166373	1.70421913555162e-05	8.86954196941364e-05	2.0629202625911
APCDD1	1.22134439536363	7.75393506275525	4.72094104976645	1.75231231160607e-05	9.08063703465881e-05	2.03580314888767
CUBN	-1.84358686158993	11.1009804792477	-4.71124610151149	1.81205850746213e-05	9.36118786142798e-05	2.0031380576922
ALDH8A1	-2.55895207191119	10.0908694226505	-4.70866512736817	1.82829739692912e-05	9.43761627069021e-05	1.99444661660742
CD3D	1.07831027398489	7.93997784973797	4.70692858176058	1.83930344315664e-05	9.48443764426999e-05	1.98859988563395
PLP2	1.15212360422498	10.0966072859394	4.68383742440642	1.9919662885878e-05	0.000101742369118603	1.91093890498838
RNF180	-1.22297076613991	6.45650012359218	-4.68282165396757	1.99895928501937e-05	0.000102030213506197	1.90752623780237
RSAD2	1.0084223468201	7.18033140433657	4.67050843724893	2.08566362924562e-05	0.00010578867972759	1.86618206742435
COL8A1	1.00941366900227	6.07040290585068	4.6676018483124	2.10666147047428e-05	0.000106776738612092	1.85642917481381
CRIP1	1.18926579466003	10.5721934494726	4.65451579474949	2.203788641133e-05	0.000111010684570051	1.81255096664504
AQP9	1.01805210101379	7.42748756588894	4.64734762554256	2.25883550907775e-05	0.000113579209794571	1.78853753106695
TNFRSF11B	-1.71454005880107	8.35364098633102	-4.64451477816056	2.28095880354323e-05	0.000114472532937882	1.77905173788626
SCG5	1.86710667029087	5.75627653794348	4.64000107747678	2.31664745815479e-05	0.000115891501224691	1.76394261949401
FILIP1	1.05713257239225	5.62633134811238	4.6340354514576	2.36465515948283e-05	0.000118052066036331	1.74398281648992
STEAP3	1.46150447873093	7.00684681571766	4.62070656150983	2.47546053754058e-05	0.000122957492488078	1.69942614420578
C14orf105	-1.1823215933452	8.95421391885506	-4.61573277962831	2.51809604481101e-05	0.000124885330157631	1.68281338636488
WFDC1	-1.25058964551774	8.27134706018439	-4.61242719737011	2.54682794869664e-05	0.000126246403122039	1.67177672630597
SEMA3G	-1.18599624310171	7.69233030125952	-4.58653049948821	2.78328753867405e-05	0.00013672289663662	1.58542979319977
ACSM2A	-1.79289375908433	9.2554133159031	-4.5850237396061	2.7976872570087e-05	0.000137326997839646	1.58041224238491
NAT8B	-1.96945541106887	8.23553709500948	-4.57917259278152	2.85429866694917e-05	0.0001399305999805	1.5609344941874
TMED6	-1.91970490995041	7.51193153711543	-4.57755525720631	2.87014329591434e-05	0.00014050537823469	1.5555524735619
C11orf54	-1.07950766773262	10.2278209451114	-4.5767641615401	2.8779247300985e-05	0.000140807101123142	1.55292023679743
CCL18	1.77841792662878	6.76917062353212	4.57057576346282	2.93951100690303e-05	0.00014353367148804	1.53233617175879
ARL4C	1.11836429005971	8.38253994031569	4.5690729261926	2.95466032474479e-05	0.000144165651891954	1.52733919952521
HMGCS2	-1.86943967771045	7.84187298295879	-4.55592864029938	3.09045324760636e-05	0.000150155884117711	1.48366449812094
LCN2	-1.15811676435479	6.82606716581766	-4.53553804263415	3.3132541024265e-05	0.000159832095514545	1.4160209685748
TDRD9	-1.0223797058949	6.10868575360548	-4.5205565295946	3.48687140828258e-05	0.000167219671158156	1.36640635800828
HCG4	1.27692659475482	6.31685607446604	4.51881253054286	3.50765038979595e-05	0.000167887540024421	1.36063542063141
APOE	-1.11002333766996	11.1036040004024	-4.51758189255538	3.5223855917646e-05	0.000168551654293423	1.35656380022736
CD27	1.05525010461968	7.21647398293126	4.51192652469606	3.59088138485089e-05	0.000171369065359331	1.33785907312373
AQP1	-1.72865400909897	11.1807498623726	-4.5067784795238	3.65436189959201e-05	0.000174101830899376	1.32084130829277
LPPR5	1.54320851763921	5.23489835188481	4.49849651798764	3.75879187796156e-05	0.000178642872958406	1.29348195081704
FCGR2B	1.10386776223152	7.47732148821874	4.4938159092836	3.8190933317506e-05	0.000180894705902155	1.27802953168307
CDK18	1.06238842963243	8.42657712333103	4.48163248038956	3.98051608104622e-05	0.000187633754662111	1.23784125026353
GIPC2	-1.74477821222923	9.45702520151451	-4.47907189420115	4.01527909067106e-05	0.000189029977638111	1.22940111287126
RBP4	-1.72133330939286	7.88342199721562	-4.46747936942342	4.17640228522266e-05	0.000195550608672633	1.19121727740049
GPM6B	-1.13660036684715	6.47200750307366	-4.46706044754194	4.18234136257051e-05	0.000195781921916365	1.18983825340254
C16orf54	1.33315287489682	5.81246294826572	4.46658411155001	4.18910441082973e-05	0.000196051686848765	1.1882703021917
DYNLRB2	-1.05564735251313	7.75298561298213	-4.45843768734111	4.30643244181962e-05	0.000201014707929661	1.16146647916859
HRSP12	-1.11039115392221	10.069834060439	-4.45580570309135	4.34501970956057e-05	0.000202367344609557	1.1528113082923
CXCL10	1.66969942382925	8.84753651187262	4.45463916369647	4.36222986832719e-05	0.000203038958487801	1.14897593255925
NLGN1	1.27783840644775	7.04028857217036	4.44840963062352	4.45526649800742e-05	0.000206976116048698	1.12850204088449
BEX4	-1.04817340989314	9.98156868804056	-4.44194634177515	4.55383849692613e-05	0.000211105095883993	1.10727365908977
ACSM2B	-1.5888255468172	8.35482311846192	-4.44148367683829	4.56097560326869e-05	0.000211286035982194	1.10575459590063
TMEM100	1.40636921341315	6.76893531768639	4.41455505774938	4.99570627530365e-05	0.000229418563720599	1.01746492394056
BLNK	-1.18953312361999	9.00804656319298	-4.41368269537807	5.01044441933893e-05	0.000229987612690967	1.01460887118721
PVRIG	1.02200682304922	6.34059557593126	4.41007283729247	5.07188288665787e-05	0.000232698746672505	1.00279321648
AMIGO2	-1.07111276235975	9.11216038279789	-4.3972483717995	5.29614308112587e-05	0.000241855555428861	0.960852777840085
LAG3	1.05604553854228	5.92559836365485	4.39426338741093	5.34971088265696e-05	0.000243960756863836	0.951098962775534
GABRP	-1.32226640120331	4.91907503112563	-4.3925960744267	5.37986140401752e-05	0.000245164574561133	0.945652144217945
TSPAN7	-1.38641785386554	9.02413414133044	-4.3899868507476	5.42737722275305e-05	0.000246956129098823	0.937130196155081
CD163L1	1.25461508158662	6.32652136993216	4.38562976265672	5.50763550576615e-05	0.000250115050771586	0.922904823246261
CTB-167B5.2	1.15165117111719	4.63032523594675	4.372859784525	5.74957568368766e-05	0.000260498574665461	0.881250324328573
VNN2	1.10066278982438	7.08212376707192	4.35256683966861	6.15548013022777e-05	0.000276968343784354	0.815173772620023
NAP1L3	-1.28141355156567	6.72383303900442	-4.33989338471655	6.42298425271981e-05	0.000288013020712213	0.773980829792361
EHHADH	-1.1358003297351	9.37441536106268	-4.32238203831756	6.81129036304641e-05	0.000303343083653055	0.717156940735443
RTP4	1.25221596624655	7.99098251016909	4.31938131720484	6.88008296447403e-05	0.000305920204409462	0.707430658633765
GPR183	1.07737903945186	7.5210446088464	4.31000205005554	7.0994913237537e-05	0.000314961588831083	0.677050324560584
BEX5	-1.52918112341896	9.14516272454791	-4.26947027045279	8.12844348502014e-05	0.000355937203544224	0.546130043682738
TSPYL5	-1.03022473322359	8.3168657362798	-4.26593057636456	8.22489081599107e-05	0.000359437814924025	0.534725073171578
CXCL9	1.63240138727428	8.54642251685651	4.26248324698218	8.31988972553051e-05	0.000363265401248381	0.523622133951735
EVA1C	1.18975538981547	7.52945274406284	4.22569206226471	9.40249588033125e-05	0.000405565403288936	0.405401663477853
TRIM6	-1.15058502413543	9.58223928261042	-4.22120466358443	9.54355048912872e-05	0.000410745695184284	0.391016946006622
SLC39A4	-1.05299044731808	9.02055419008363	-4.20766400462904	9.98174345035342e-05	0.000428007376125415	0.347657226046124
RNF183	-1.12398253588391	8.44418383627298	-4.20097345805887	0.000102054042728327	0.000436642487988478	0.326258426771708
KCNJ16	-1.34737417675337	10.0283562435087	-4.15630247088374	0.000118283066518222	0.00049921363129999	0.183822499309733
GPR171	1.10585019208218	6.39952098632461	4.14957610174287	0.000120934024145748	0.000509195891139991	0.162441724782247
COL1A2	1.09185688192631	9.01915195587475	4.14828656850446	0.000121448784560168	0.000511253474523044	0.158344758454363
DMGDH	-1.51437848381487	8.14924693450339	-4.12859243587761	0.000129579240124378	0.000541179012665207	0.0958553362692633
PSORS1C3	1.18179744389382	5.58701780438714	4.10743943562149	0.000138898986864615	0.000574835334152546	0.0289066888103218
CDC20	1.27682950441857	6.66128995691474	4.10644741057434	0.000139351632649696	0.000576465175165481	0.0257713019483603
S100A9	1.05493458259743	8.86313163746236	4.07848375618408	0.000152715005356783	0.000625671844689161	-0.062449039797384
CXCL13	2.31648421878181	5.46913078040797	4.0305621089143	0.000178550859170304	0.000717970789005224	-0.212899885972001
SELL	1.0911807574272	7.15901965529872	4.02701772604786	0.000180621155540411	0.000724999928034418	-0.223990299397203
REN	-2.30656315870612	9.18566537529073	-4.02482469850994	0.0001819137158227	0.000729292049524425	-0.230849717392096
CTC-523E23.1	1.01499955956934	5.23617895392867	4.01485954169784	0.000187900599949206	0.00075114251662338	-0.261994041842375
MALL	1.04244064611956	8.88744058718184	4.00436990899815	0.000194408144404348	0.000774156771703622	-0.294733105992151
DSP	-1.42264272429896	10.6881236749381	-4.00319297713267	0.000195151730105874	0.000776644448746221	-0.298403561956581
HHLA2	1.17752145960065	6.01424604028446	4.00152377785245	0.000196211043682617	0.000780068246689512	-0.303608246329726
RNF186	-1.26648783671189	8.94146026671583	-3.99859752463279	0.000198081532139931	0.000786547412873308	-0.312729715148329
PDGFRL	1.27029761420702	6.59055986001571	3.99757897999425	0.00019873662727402	0.00078866934492221	-0.315903798695016
RBP5	-1.27860871732604	11.1471422125682	-3.9938069758546	0.000201180931821085	0.00079721722776577	-0.327654697651637
TMEM252	-1.14985508229011	7.32805296888171	-3.99156934334906	0.000202644639033642	0.000801581215955477	-0.334622769612368
SERPINE1	1.42189445883996	7.66695163986229	3.9862598732718	0.000206159003978383	0.000813676294397161	-0.351148273636364
IGF2BP3	1.0153611530635	5.19815658150357	3.97746531946598	0.000212110015847199	0.0008336387228003	-0.37849493341521
LIPC	-1.11213404746819	7.3607061903581	-3.96193757305959	0.0002230244207758	0.00087198855918725	-0.426698868852418
PHACTR3	-1.17859061949841	5.33205613836549	-3.95707782394567	0.000226550301681353	0.000884891572928362	-0.441764379949252
MMRN1	1.36691483481498	4.44487812572776	3.93005004531509	0.000247162564673557	0.000955500813764524	-0.525368411518917
TENM2	-1.48802016536354	6.99343440379933	-3.92181830008445	0.000253791789943794	0.000977948634502449	-0.55076913641321
FHL1	1.17329123402958	9.27053268659049	3.89411612305275	0.00027738356904613	0.00105916967724609	-0.636034430603686
SLC10A2	-1.77336747003518	7.82590717175275	-3.88140662742431	0.000288901452300329	0.00109865511546109	-0.675041401033458
LEAP2	-1.23509278771785	8.66937840937225	-3.8743310544284	0.000295511824031596	0.00112183454406726	-0.696726464343825
CCL20	2.00289489917542	8.83185163538772	3.86720048080981	0.000302320812145936	0.00114502181991504	-0.718557775532958
TRAT1	1.0222155767133	4.6786694374913	3.86473050924704	0.000304714420682587	0.00115208384363015	-0.726114723846956
BHMT2	-1.02568537493549	9.10292285635381	-3.85761362572484	0.000311713727744062	0.00117537304035853	-0.747873927504759
MMP9	1.11771910530806	7.15919798749137	3.85440769015072	0.000314917017787217	0.00118608254201181	-0.757668434960282
SCN3A	-1.1272137001253	4.5381101497828	-3.84208980742904	0.000327521974648034	0.00122672094460185	-0.795258456609999
GHR	-1.21183623523218	8.91428402052288	-3.83423039943607	0.000335816732314866	0.00125395464914677	-0.819207313403068
GPR64	1.52006992519152	6.03614459587046	3.82538942960261	0.000345388924771736	0.00128700055618365	-0.846114043422803
LTF	-2.23729490275613	8.037010241333	-3.81809140405504	0.000353487747752448	0.00131542811010974	-0.8682984593629
BBOX1	-2.22522659967466	11.5656972723804	-3.80096655797068	0.000373214832420749	0.00138019070102767	-0.920259747291013
MGAM	-1.59239622188	8.97541704992641	-3.78989133501128	0.000386531896279732	0.00142352971948191	-0.953793937537276
LRP2	-1.659376296773	10.5006298324136	-3.78909561731703	0.000387506063125127	0.00142684930250845	-0.956201102209547
SLC2A2	-1.64570539282956	8.59656343426081	-3.78583698703689	0.000391520145277968	0.00143946630040296	-0.966055924640877
EFEMP1	-1.38877282316403	8.06799406403387	-3.77174992022911	0.00040933727254809	0.00149701315013243	-1.00860234734539
HTR2B	-1.21535217212847	6.08491922501915	-3.76674283140661	0.000415855754770571	0.00151783478463747	-1.02370301317453
FAP	1.10403284641857	6.37884481200024	3.74813508445836	0.000440964666590375	0.00159876201723481	-1.07971976686851
SORCS3	1.37106571973334	5.2001102557684	3.74308315121707	0.000448028898155732	0.00162137488992842	-1.09490036880434
ENPP5	-1.2694454428365	7.72213952597703	-3.73113942545636	0.000465164486477935	0.00167380648705113	-1.13074284548271
CLDN2	-1.63033320425967	10.4118244164511	-3.72252138259184	0.000477917332765796	0.00171434475150249	-1.1565636561829
SLC22A11	-1.45174411452017	8.88740879607651	-3.71677887198432	0.000486600428596526	0.00174294013166884	-1.17374961699274
SPX	-1.40797027391941	8.50623374807237	-3.69908000628012	0.000514324131587904	0.00183020206592645	-1.22662020489835
COL15A1	1.20357999877858	9.34577741647221	3.687755666885	0.000532850111212338	0.00188721759663206	-1.2603706995179
GBA3	-1.80373736771229	10.6857995653987	-3.67407304240625	0.00055608756188163	0.00196101407212666	-1.30106811863274
RNF182	-1.14511907304489	6.47206051122394	-3.6665402160772	0.000569291719324125	0.00200145608946239	-1.3234353805114
VNN1	-1.34004662356775	8.48449584628967	-3.60958477764143	0.000679300740019837	0.00234200431035863	-1.4916643239609
PDZK1	-1.50403560780734	10.8456605523209	-3.5781851306195	0.000748355812928541	0.00255047364517465	-1.58372893402631
C1S	1.33883799244031	9.25253425533669	3.56493249900781	0.000779469901586171	0.00264639010412073	-1.6224389096727
SCGN	1.49826550784958	7.66780137852163	3.54054936814382	0.000839968569265079	0.00282778838158632	-1.69343006152298
TMEM27	-1.92952384950856	11.2013417344157	-3.53509833134366	0.00085409315429521	0.00286795028682305	-1.7092596527321
MUM1L1	-1.3591696880893	6.71220154877202	-3.46803383958976	0.00104747407153234	0.00343155219264771	-1.90276970108334
CXCL5	1.22568759613826	4.28923290896674	3.46376507717945	0.00106109908302944	0.00346709423237801	-1.91500834876968
ACP5	-1.06322049351597	9.50389403112843	-3.41906761285934	0.00121425928116238	0.00390347415299042	-2.04258384090901
EMX2	-1.29350451368396	9.22282011147756	-3.38302658243178	0.00135281856111761	0.00428563824113545	-2.14468172500541
SLC7A5	1.20026742915909	8.28057075464651	3.36614937148847	0.00142274074142986	0.00448161994451002	-2.1922525105956
CPA3	1.41870059697286	7.89498866426391	3.32350697279162	0.00161498190281365	0.00501404170681888	-2.31175768577972
AOC1	-1.86865849921363	10.3548255873821	-3.2237205648876	0.00216524246523434	0.00647228188479383	-2.58747766151371
ACE2	-1.68456119680432	9.36668574451094	-3.22004386218532	0.00218856065762236	0.00653154902084456	-2.59752967244369
SLC6A13	-1.33440223520342	10.3090295684387	-3.21746033839248	0.00220508710513015	0.00657634011876916	-2.6045883491329
ACMSD	-1.35539827112902	9.96876318378108	-3.15376231868564	0.00265172192153594	0.00771810954293204	-2.77740970395041
SLC51A	-1.18429266518523	6.65239393800809	-3.15204296682069	0.0026648821266296	0.0077500538316161	-2.78204194589228
MYH8	-1.43087744248049	5.79561171576642	-3.15117873872704	0.00267152022713109	0.00776305358810518	-2.78436967917805
COL5A1	1.13495338508687	7.13494757855724	3.14307267554941	0.00273454335298471	0.00792539637099744	-2.80618148967293
NR2F1	-1.07032070149046	9.07211197577134	-3.11198579768256	0.00298941748795135	0.00859002826034987	-2.88947223175481
LGALS2	-1.22485087434101	10.4926005666689	-3.10586291088176	0.00304217578516507	0.00871989549418477	-2.9058099441199
OLIG1	-1.0747013560287	5.48727180759002	-3.09012829975463	0.00318178662270383	0.0090591251895693	-2.94769247268749
MMP7	-1.35592191230338	10.4371292137389	-3.01002501622041	0.00399043238538672	0.0109818133605139	-3.15860493957673
HABP2	-1.06952310804116	8.23147584547254	-3.00339323245341	0.00406534540868984	0.0111535232377269	-3.17589159980116
PF4V1	1.26079923663806	4.78023581509155	2.95002377950842	0.00471774989402922	0.0127121113449234	-3.31401770517445
SLC22A2	-1.3997362844488	10.0239247788711	-2.93082922647722	0.00497532418028082	0.013327368311262	-3.36326154742051
INHBE	1.34326510039258	5.51521779317654	2.92529851522878	0.00505193331500195	0.0135023669344948	-3.37740769617831
NOG	1.04906074112539	5.02945295568734	2.91527686385078	0.00519354938939918	0.0138118816868689	-3.40299138414754
A1CF	-1.14957638683184	7.98909700162531	-2.85498433081776	0.00612633251063809	0.0159041214845704	-3.55556114543691
TRHDE	-1.22063656529442	8.09811808744145	-2.81846082522971	0.00676450746917364	0.0173471603291644	-3.64684682222094
COL6A3	1.06212881035436	9.47697650259463	2.66545107968072	0.0101624262022748	0.0246300919456642	-4.01970667136199
PTPN20B	-1.1038348700319	6.17022523068822	-2.63518686367997	0.0109969037181993	0.0263463284288848	-4.09158463366217
C8orf22	1.04022329864098	5.12662641886536	2.5439555756054	0.0139051318002526	0.0323030204201671	-4.30441938959734
PCOLCE2	-1.00711810236057	9.00914048523326	-2.47061835063716	0.0167313130064583	0.0379333412292172	-4.47124844386683
GC	-1.6154444899012	5.69830146418268	-2.38655344364061	0.0206011338433866	0.0453942915492273	-4.65770147099966
FGG	1.67572745013035	6.50411144350999	2.37018687225227	0.0214419046186443	0.0469513272847087	-4.69339886168827
HAVCR1	1.09292984734018	6.72007727142561	2.35397989735883	0.0223046214126601	0.0486005385702739	-4.72855245186713
