# Supplementary material for: Identification of 9 key genes and small molecule drugs in clear cell renal cell carcinoma
Source: Aging (Albany NY). 2019 Aug 18;11(16):6029–52. doi: 10.18632/aging.102161 (PMC6738436; doi:10.18632/aging.102161)
Supplement: Supplementary Table 3 [file aging-11-102161-s005.xls]

logFC	AveExpr	t	P.Value	adj.P.Val	B
PDK1	2.74847208898685	9.23312899423358	25.7188617506309	9.40708053182372e-56	1.84369371343213e-51	116.48908168573
EGLN3	3.72427650795363	9.94923324426803	25.4513150077844	3.24494435327669e-55	3.17988321899349e-51	115.263081798359
CA9	4.80290905703876	9.04608710866883	24.9144538701373	3.99226572610351e-54	2.60814719886342e-50	112.777160830325
HILPDA	4.55169855122425	10.9710140593901	24.5447852257381	2.29279420403818e-53	1.12341184012361e-49	111.045178621991
PFKP	2.78695163892681	11.2024387625026	24.3044005751076	7.20796036916726e-53	2.82537630550618e-49	109.909979528092
KNG1	-7.24986386694143	8.77428889882801	-23.170831434673	1.75586413391588e-50	5.73553019343623e-47	104.460555758173
SUCLG1	-2.14413767235274	12.1449178130467	-22.9255725729421	5.88648445492866e-50	1.64813155474495e-46	103.260394282637
ANGPTL4	5.5304074137123	10.0430835876876	22.8845088383538	7.21328754684867e-50	1.76716528288359e-46	103.058710140581
SAP30	2.24853385141646	8.48360490432809	22.7732440696308	1.25251094785887e-49	2.72755134078733e-46	102.511163938256
GPD1L	-1.92353743986484	10.3319249951394	-22.7310497748942	1.5446717167123e-49	3.02740209758444e-46	102.303111825482
IGFBP3	3.37926421511624	12.9081493960154	22.6999080743123	1.80343726649187e-49	3.21323336236128e-46	102.149413459112
CALB1	-7.82193016050026	9.25942745801743	-22.6757641385878	2.03370034442057e-49	3.32154108752489e-46	102.030167720792
LPPR1	-4.31233968360052	7.63008888070313	-22.6142152077627	2.76352987647544e-49	4.16634015761863e-46	101.725846410812
HYKK	-2.21139973739075	8.0061836678344	-22.531335777973	4.17944455583512e-49	5.85092384641518e-46	101.315300140871
SLC13A2	-4.73975264611818	7.55701612201438	-22.4077718136684	7.75626575255055e-49	1.01343368322826e-45	100.701602326762
HRG	-4.87261413541029	8.12239441578581	-22.314165242682	1.24060201038909e-48	1.51965992510098e-45	100.235399979942
EHD2	2.96664874760269	8.89319006066087	22.2938507021435	1.37392487548048e-48	1.58397374320834e-45	100.134077282525
ENO2	4.40572954138259	9.07218456338465	22.257080670388	1.65294987263377e-48	1.79978691965274e-45	99.950546001412
CAV2	2.54664890642771	10.7935630094355	22.1057226773145	3.54455093308808e-48	3.65629756513649e-45	99.193254177531
SLC4A1	-3.43814490505863	7.97464746971463	-22.0765730412872	4.10684842792263e-48	4.02450611694278e-45	99.0470737734499
LPCAT1	3.23146156397677	10.2127806115098	21.9909681677984	6.33246600894825e-48	5.91000006235128e-45	98.617152951095
KCNJ1	-6.51616130960719	8.67592989460018	-21.8893774524207	1.05992193308335e-47	9.44245907568204e-45	98.1057338086989
NETO2	3.4053921491006	8.98017286556511	21.7449426907157	2.20945605691615e-47	1.88274475041303e-44	97.3763602171927
SLC12A1	-6.87678974579325	9.40836686560298	-21.7275694817155	2.41398232146543e-47	1.97131831326671e-44	97.2884482177425
NDUFA4L2	6.37217996614838	9.64746237703136	21.6669192614014	3.28918675703813e-47	2.57859085004762e-44	96.9812425810148
SEMA5B	3.26887179376183	9.83704942065134	21.6382616385541	3.8075164377865e-47	2.82271989306327e-44	96.8359219533028
BHLHE41	3.30555796050724	8.90883099066061	21.6341347230206	3.88863906896823e-47	2.82271989306327e-44	96.8149860079276
ABAT	-3.66784673133091	10.7576708758981	-21.6080964380339	4.44208474168465e-47	3.10930067329563e-44	96.6828427979298
CAV1	2.9727398501455	11.2689370240543	21.4549498358976	9.73261875423062e-47	6.57757224014365e-44	95.903870623649
SLC22A8	-7.16359890546392	8.96781146078993	-21.3804447600376	1.4269700696615e-46	9.32239546509856e-44	95.523816290988
APEH	-1.40632316104029	9.34545173158035	-21.3441464273212	1.71984448780987e-46	1.08733006827696e-43	95.3383984049158
ANXA4	1.54663738397964	13.7047680295128	21.2475853373373	2.82823219540027e-46	1.73220383742656e-43	94.8443245936506
ST8SIA4	3.21707914165579	7.62252261019206	21.2336377297306	3.0392106056061e-46	1.786834657947e-43	94.7728599186947
DIO1	-6.77104674288712	9.41045116354699	-21.22981368281	3.09976929283117e-46	1.786834657947e-43	94.7532619225037
TNFAIP6	5.68768951255629	8.51917888376968	21.2217523236138	3.23143300374574e-46	1.80951015544037e-43	94.7119418164502
AP5M1	-1.09143824049966	10.0912481961491	-21.1221470986779	5.40639637071057e-46	2.94333229082101e-43	94.2007063163556
DCXR	-3.25725055514518	11.3297069945999	-21.1112879751775	5.71884719832945e-46	3.02928881729889e-43	94.1448935088614
PTH1R	-3.79092736157494	10.9560642378133	-21.1008430409452	6.03649041807307e-46	3.11339936062669e-43	94.0911952155303
ACSF2	-3.62959868175447	10.1725373214675	-21.0931749123079	6.28091913846594e-46	3.15640344089215e-43	94.0517637887506
ZNF395	2.61268605613198	10.566421765751	21.0402007998984	8.26422598007154e-46	4.04926412458555e-43	93.7791512333293
TMEM52B	-5.40659759656843	9.60530318533856	-20.9973882575046	1.03188803329499e-45	4.93267647915818e-43	93.5585680047983
MIR210HG	2.77409956498573	7.91127253345049	20.9536604699659	1.29487628896496e-45	5.92403542613691e-43	93.333025881527
NOL3	2.42281881999983	9.61902834762897	20.9504200264791	1.31685779726917e-45	5.92403542613691e-43	93.3163023194014
AQP2	-4.82418155716126	9.13084161857875	-20.9485152536266	1.32995335858985e-45	5.92403542613691e-43	93.3064713721786
RALYL	-6.25509433180634	7.0264346514213	-20.8758559882588	1.9405205801511e-45	8.45161396675143e-43	92.9311127621362
UMOD	-8.11492538003571	11.0728444492251	-20.8241054008278	2.5407389654969e-45	1.08252049966899e-42	92.6633546666266
PAG1	1.97599751025563	8.75739675364554	20.8034290853972	2.8298523309112e-45	1.18004842198997e-42	92.5562789001142
RP11-999E24.3	-3.77569710959936	8.60169572395892	-20.7027385745014	4.78659039765845e-45	1.95442469174392e-42	92.0340504469746
GGT6	-4.32037952195934	8.20960443477305	-20.6364565889092	6.77001220312831e-45	2.70786671773698e-42	91.6895692444644
CDCA2	3.86018709079485	7.50104840465557	20.6100522384658	7.77383966265315e-45	3.04718967096678e-42	91.5521830270994
XPNPEP2	-6.03429104582556	8.90891804019969	-20.5118854807204	1.3008053202786e-44	4.90278528310391e-42	91.0406189921672
LOXL2	2.87073799538229	7.73983002733461	20.4447461495037	1.85109254630687e-44	6.84520053114498e-42	90.690030939783
SLC13A3	-5.23792531492183	8.35731076746051	-20.437560575167	1.92238640843533e-44	6.97719467017114e-42	90.6524749997499
RNF149	1.3838142159879	11.8193462068859	20.4006056294333	2.33503918981246e-44	8.3208060147517e-42	90.4592224126712
LDHB	-1.04937489882913	14.8081029493962	-20.3964904885916	2.38617989863857e-44	8.35120354168166e-42	90.4376917929089
ACAA1	-1.94152078929281	11.6473991890466	-20.3800396415047	2.60211381580245e-44	8.94716292559864e-42	90.351598415045
ENTPD1	2.0229679686002	8.56951629897074	20.3173034211308	3.62193314091191e-44	1.21239578696339e-41	90.0229574232672
SLC47A2	-4.60362400584336	8.92011370938009	-20.3156842053422	3.65300238505525e-44	1.21239578696339e-41	90.0144685383902
DMRT2	-4.33184836973146	7.32381835861836	-20.3126673581861	3.7116050419819e-44	1.21239578696339e-41	89.9986515467867
ANGPT2	3.30925442094115	8.39459468883667	20.2513946692166	5.12920072844496e-44	1.64798696847201e-41	89.6771527679038
VEGFA	2.04235408370664	12.5687436701679	20.2346954372208	5.60239773172605e-44	1.7709902120016e-41	89.5894480373471
ERP27	-2.76608451956978	9.78426177383482	-20.2237665214809	5.93558812694721e-44	1.84653320158791e-41	89.53202975207
TMEM213	-6.04851370370703	8.69427250271552	-20.2095294811114	6.39967559203817e-44	1.95980065513057e-41	89.4572082613556
RHBG	-4.02500428825013	6.87969345633144	-20.1104344439575	1.08150767478608e-43	3.26099521817422e-41	88.9357025521007
HADH	-2.08973993223407	11.3687186416118	-20.1039766581192	1.11917536641924e-43	3.32344212218949e-41	88.9016735512993
HK2	4.73490466884172	8.06763034103636	20.0308883819501	1.64944337712487e-43	4.82499115645825e-41	88.5161655246542
DANCR	-2.02072604272655	10.3569047878023	-20.0272001405811	1.68207398253643e-43	4.84808352701932e-41	88.4966935461645
PFKFB2	-2.11376738251601	8.03252951763123	-20.0161051668073	1.78419537775898e-43	5.06789060995627e-41	88.4381073969642
PECAM1	1.87080341093968	10.8365635490265	19.9900870753941	2.04878054322752e-43	5.73629283810232e-41	88.3006590068294
TFAP2B	-4.10497508000251	6.85073654582836	-19.9412581052082	2.65643350333139e-43	7.33287890588619e-41	88.0424711665553
ERBB4	-3.38359796002162	7.17884748607611	-19.8785487090224	3.7098827169567e-43	1.00986099124492e-40	87.710441372843
NINL	-1.47835314805448	10.1003345742145	-19.8314390405261	4.76954816972446e-43	1.28052567915657e-40	87.4606769493945
MCUR1	-1.09139545599248	10.6139104350825	-19.8083873791745	5.39404474308083e-43	1.42862003945461e-40	87.3383589874273
SLC26A7	-3.94854905792194	7.53657716024925	-19.7867236965038	6.05565036481613e-43	1.58246255333375e-40	87.2233440500578
UPP2	-4.59059621520078	8.43971234787306	-19.7810842029016	6.2408696864728e-43	1.60940532875237e-40	87.1933934978966
SLC7A8	-3.2204980416139	9.36988802119468	-19.755354352462	7.16083408712063e-43	1.82266476978542e-40	87.0566943150732
HSD17B10	-1.00952305269096	11.4055654457307	-19.7477705315328	7.45714216105053e-43	1.87375037454397e-40	87.016386363955
SERPINA5	-5.94441180766213	8.56182296494385	-19.7271125404639	8.3282544371553e-43	2.06395289764948e-40	86.9065520207011
CLCNKB	-5.32244411959343	8.86677703032821	-19.7249596117142	8.42472737445574e-43	2.06395289764948e-40	86.8951021983662
TEX264	-1.15742524000032	9.34329100144946	-19.7071840979929	9.26537820738512e-43	2.24187836403137e-40	86.8005448716731
LAMA4	2.52713820163586	7.90952898622555	19.6930761172136	9.99217444714706e-43	2.38825154865409e-40	86.7254683590088
SUOX	-1.58117976304189	9.78877399941003	-19.6029886410393	1.61935803898992e-42	3.82383110917631e-40	86.2454630088667
SLC12A3	-4.45359423807051	7.48727621142765	-19.5627631245999	2.00961437305332e-42	4.63369789382024e-40	86.0307984911438
FUT11	1.69199468986309	9.38342834120105	19.5513612687389	2.1365235777189e-42	4.86903786043171e-40	85.9699146686272
PRDX4	1.48927995018124	12.1051808019111	19.540676324578	2.26275160290664e-42	5.04801617007727e-40	85.9128439853117
SLC15A4	1.87579027813618	10.0505736641139	19.5403623573589	2.26657188104903e-42	5.04801617007727e-40	85.9111667959509
SEC61G	1.27351633583362	11.9079450420495	19.5035761153705	2.76213065846532e-42	6.08258413205189e-40	85.7145705136198
PPP1R3B	1.83055789195961	9.00842653470848	19.5001061559241	2.81415740376735e-42	6.12829677293737e-40	85.6960171540633
NPHS2	-6.91700533032014	8.68914104749276	-19.4296839587799	4.11114422142447e-42	8.85432039513168e-40	85.319148896835
GPC3	-2.60279027256169	7.82946655291898	-19.3765237867424	5.47526680126944e-42	1.16641036997913e-39	85.0342414804568
ZC3HAV1L	1.57581348380858	9.90399419944057	19.3597859126739	5.99264811014769e-42	1.26290226140629e-39	84.9444619207581
SMIM5	-3.20575845787324	8.2764712204745	-19.3486179616638	6.36489912114298e-42	1.32708146675831e-39	84.8845388353701
PCCB	-1.91421268779051	9.41865800557606	-19.3288191460972	7.08284724986635e-42	1.4550964127372e-39	84.7782667983723
SLC1A4	1.39973056216787	7.58527613028166	19.3276586986925	7.12736647904338e-42	1.4550964127372e-39	84.7720364417641
PFKFB4	2.58186329165742	7.25803981284132	19.3214821703817	7.36909397986634e-42	1.48893683413815e-39	84.7388722398468
STAMBPL1	2.32589681184598	8.5295519672003	19.3117235705804	7.76790471692248e-42	1.55350167905065e-39	84.6864646221012
GJC1	2.46009734028726	7.61014992353089	19.2943512730315	8.53228189124604e-42	1.68913326047001e-39	84.5931384677318
IKBIP	1.87574047915428	8.75681663950646	19.2887342815411	8.79524761509953e-42	1.72378058008336e-39	84.5629550948699
ATP6V0D2	-3.92279066537436	8.73925925002233	-19.2775623033716	9.34272126274524e-42	1.81295043592618e-39	84.5029096402203
TMCC1	2.06444349828358	9.4540705341364	19.2584019532328	1.03625479508109e-41	1.99113311066611e-39	84.3998926405467
KDM3A	1.06428801687633	10.0373830683678	19.2514952172886	1.07569744098288e-41	2.04685380056539e-39	84.362746664308
RHCG	-4.88526615769944	7.20959369452707	-19.1848418425518	1.54308069214228e-41	2.90796523897082e-39	84.003959207217
ATP6V1G3	-4.661191537585	7.80118231955436	-19.138872524975	1.97970452240771e-41	3.66039895610081e-39	83.7561839080862
ACPP	-3.66702570794606	7.07868920056446	-19.1212535313005	2.17824044713011e-41	3.98984434797225e-39	83.6611464131125
ENPP6	-5.44661184078851	7.74512539400712	-19.1099543682566	2.31596688667484e-41	4.20283657517966e-39	83.6001776605662
PLK2	2.58733283251029	10.2425432279657	19.0808871791202	2.71182123510253e-41	4.87605361346555e-39	83.4432609099597
NPTX2	6.35702236294773	8.22375150953981	19.057703366287	3.07575619223288e-41	5.48015869196111e-39	83.3180285624833
ALDOA	1.21228966617244	13.5353095161584	19.0489049266309	3.22637708039837e-41	5.69673553141691e-39	83.2704841368483
ATP6V1C2	-3.67532827219546	6.89051058001504	-19.0292241419071	3.59066148078077e-41	6.28333699659127e-39	83.1640990486842
PRLR	-2.74847770884877	7.56694163063398	-18.9930392356277	4.37168417851996e-41	7.58235736414271e-39	82.9683729332068
AHNAK2	3.64551800833885	7.96020907250327	18.9910428903466	4.41943258033613e-41	7.59793501245683e-39	82.9575697886621
SOST	-5.06003319414112	7.03659306035106	-18.989205198666	4.46384913741078e-41	7.60756341253164e-39	82.947624747876
TFCP2L1	-4.01392919208064	8.82254930735031	-18.9828306960395	4.62142287956862e-41	7.80821267385047e-39	82.9131245370498
COL23A1	4.04248883683679	8.96719407304762	18.975646524766	4.80571709382887e-41	8.05019224973948e-39	82.8742360842575
FGF9	-4.64592567968357	7.68053339920849	-18.9448590469437	5.68286746345361e-41	9.43885757764638e-39	82.7075075517084
ITGA5	2.03660741789378	9.56236955734775	18.9420994862351	5.76894118817851e-41	9.45240223687026e-39	82.6925574166397
ALDH6A1	-3.22656402680374	11.8957062508948	-18.9415105271357	5.78748032259009e-41	9.45240223687026e-39	82.6893665607179
SFRP1	-4.33764430892727	8.90242160841659	-18.9337332705357	6.03797709264386e-41	9.78002587096918e-39	82.6472269332327
ASAP1	1.1825722144832	9.90944997176988	18.911939964683	6.79946029712816e-41	1.0923165767493e-38	82.5291033855441
KCNJ10	-4.52797011555622	6.97872744224129	-18.9009010436538	7.22125094271528e-41	1.15064469289656e-38	82.4692476975051
COQ10A	-1.14210626221354	9.4188299879749	-18.7669899258169	1.50041030628445e-40	2.3345823363755e-38	81.741930304168
SFXN2	-2.21403065443938	9.52048411324842	-18.7669327589195	1.5008795060121e-40	2.3345823363755e-38	81.7416193307048
DDIT4	2.46273650529521	12.3698815678211	18.7648304344923	1.51823714471321e-40	2.34298659836489e-38	81.7301829331417
TLR3	2.15384330656826	9.91624244178638	18.7497384363154	1.64890472581923e-40	2.524756540729e-38	81.6480679857718
PSMB8	1.91635426842979	10.4314788374298	18.7333116140305	1.80400076281018e-40	2.74082255428812e-38	81.5586578974496
ALB	-5.38592477096625	8.58196808478355	-18.717579917971	1.96625280895238e-40	2.96435298481982e-38	81.4729996732798
PYGL	1.77544526852123	9.73499180342527	18.6860892500665	2.33641159372609e-40	3.49552143705631e-38	81.3014417035032
MPC1	-2.03480709276216	11.2776266979455	-18.6523083958169	2.81168274373694e-40	4.17470985564396e-38	81.1172692380317
KISS1R	5.39988689304506	8.74280008827017	18.6503569391515	2.84193224560715e-40	4.18789699862065e-38	81.1066255850601
ADM	2.61056968348526	12.6911024009278	18.6477070770967	2.88353154186177e-40	4.19855840322638e-38	81.0921719218125
TMPRSS2	-3.34415270528357	6.90954386406557	-18.647171602154	2.89201175792419e-40	4.19855840322638e-38	81.0892510691507
NRK	-3.6719380864652	6.80260908310179	-18.5824679470374	4.12494847493064e-40	5.94447537942394e-38	80.7360490327127
OVOL2	-1.81883455659745	6.5964741655932	-18.5530366940919	4.84887207085424e-40	6.91393581528808e-38	80.5752180980557
P2RX7	2.70208842618072	7.57473222889091	18.552311955447	4.86822359564139e-40	6.91393581528808e-38	80.5712563083172
VASH1	1.71873089396354	7.14320152369498	18.5138013726193	6.01626652934499e-40	8.48293580637643e-38	80.3606439012184
LSM3	-1.02851464513331	10.4985566743265	-18.5045911611749	6.32894271096193e-40	8.8600677280102e-38	80.3102464004065
HS6ST2	-5.0357119494755	7.33946412454973	-18.4961593185133	6.62948245984077e-40	9.21498061917866e-38	80.2640988254317
FABP1	-6.63215269200476	8.33002321819674	-18.476756840439	7.37662238753916e-40	1.01812973361535e-37	80.1578752916885
ATP6V0A4	-5.65958118597143	8.0345374757217	-18.4732491862887	7.5204542050351e-40	1.03072295080058e-37	80.1386668060836
SELENBP1	-1.94594069957078	10.5075643157312	-18.4572622152618	8.21251030324017e-40	1.11775687106392e-37	80.0511002075532
MUC15	-5.76552336257231	6.20678935394781	-18.4377143910921	9.1462238491374e-40	1.2362540773741e-37	79.9439864025822
MCAM	2.40208110750311	10.4354163033432	18.435640439024	9.25134140942088e-40	1.24189753618657e-37	79.9326192425329
AXL	1.88774413760077	9.54190927146705	18.406898495461	1.08394323878755e-39	1.44518391408145e-37	79.7750321405687
ERO1L	1.48001754018287	9.92733641787327	18.4002002891035	1.12472634285908e-39	1.48942645903346e-37	79.7382923315503
POLH	1.10603344357029	7.50385671483829	18.372210651129	1.31250202302847e-39	1.72642464089497e-37	79.5847084638442
ACKR3	2.46749451546359	9.68381958934529	18.3689412194253	1.33639572373013e-39	1.74613465262579e-37	79.5667622181093
RNASET2	2.8879091687953	10.9704884561607	18.3304719318752	1.65260156659987e-39	2.1407423840774e-37	79.3555011130369
EPB41L5	-1.53413226770551	9.09786199584925	-18.3225374449428	1.72663866733651e-39	2.21179027719793e-37	79.311904688605
TMEM91	2.51628997249357	8.77862374521474	18.3043074577402	1.90960839171341e-39	2.4302866798176e-37	79.2117096980862
HPD	-7.54129797670499	9.32553803204889	-18.2987967615727	1.96865988886232e-39	2.48927517172984e-37	79.1814139394501
SLC7A13	-6.38426469880735	7.71992860649122	-18.2858151386767	2.11511802603217e-39	2.65732039693618e-37	79.1100309997722
FXYD4	-5.81380197065085	7.90711915387551	-18.2822566071455	2.15714251021185e-39	2.69285579984981e-37	79.0904598299511
DAO	-3.50944225497902	9.11641305930483	-18.2672138538202	2.34425428931818e-39	2.90791391242702e-37	79.0077106291316
CXCR4	2.7420983484694	11.0512399243823	18.2315906689672	2.85498070098126e-39	3.50513273051966e-37	78.811638677632
COMMD8	-1.05176606302373	12.134324211934	-18.2311799253139	2.86147883505865e-39	3.50513273051966e-37	78.8093770113547
BDH1	-1.99724204403417	7.79397311554722	-18.2132586302139	3.15994189073772e-39	3.82738766390722e-37	78.7106772828435
VWF	3.83737425042664	9.9845731844982	18.2130488588949	3.16361447804974e-39	3.82738766390722e-37	78.7095217545933
SORD	-2.6462168954296	10.4556219849058	-18.1645333057597	4.13919690417163e-39	4.97693988496072e-37	78.4421279475615
ACADSB	-2.14961438872109	10.3287040838271	-18.1488065042913	4.51629933637838e-39	5.39725309107804e-37	78.3553875685245
HACL1	-1.28782170163411	9.88019084487741	-18.1410085790512	4.71588507223919e-39	5.60161403217066e-37	78.3123672589994
MYOF	1.67200505373362	10.7483456556538	18.1110854082609	5.56749390867061e-39	6.57333211542381e-37	78.1472152146393
UQCRC1	-1.52343812862872	11.8928007437255	-18.1058541507636	5.73150552172569e-39	6.72645369582646e-37	78.1183315846671
SCARB1	2.7165130975226	8.27727057252772	18.1018412479489	5.86059943602895e-39	6.83701716349591e-37	78.0961726534959
RP11-410L14.2	-1.35298458777248	8.4856965363115	-18.0661277482702	7.14609281932445e-39	8.28735344177158e-37	77.8988787787076
DDB2	2.56367643475332	9.00744408281734	18.0433585417117	8.10986761058176e-39	9.34972325292894e-37	77.7730123535408
DIRAS2	3.07566351417668	7.28180694215321	18.0276427588999	8.85021621675885e-39	1.0143589920015e-36	77.6860998005159
DTL	2.03985207236258	6.87313034527222	18.0122910430961	9.63890228977358e-39	1.09833049986786e-36	77.6011715524274
CLDN8	-6.38492923804108	8.0355891423418	-18.0039585581591	1.00961388775044e-38	1.14378165237115e-36	77.5550628307346
PEPD	-2.65106991004095	12.0644307962654	-17.9970243203599	1.04932073153413e-38	1.18193316191594e-36	77.5166850144025
PPFIA4	4.01551125917886	6.46279173437329	17.9806679653806	1.14930353252833e-38	1.27261016576399e-36	77.4261369184158
MPP7	-1.76932024789004	7.489872217103	-17.9623749467547	1.27250032786043e-38	1.40110864751329e-36	77.3248289644584
OGDHL	-2.99873441725163	10.854534619673	-17.9608708215301	1.28320158112981e-38	1.40499820047839e-36	77.3164972079717
TGFA	1.76292549272332	9.41734233612138	17.9585191798722	1.30011391176764e-38	1.415607364263e-36	77.3034702774532
GIT2	1.37983897210905	9.04797890830347	17.9537250800826	1.33528798899141e-38	1.44587344178136e-36	77.276911255707
COL4A6	-2.58502210718785	6.18855420526756	-17.9503557513909	1.36057875053756e-38	1.46516389735086e-36	77.2582437076421
ECHS1	-1.82335344411423	13.5048661774965	-17.9219589292659	1.59376799558194e-38	1.70689939592407e-36	77.1008581549912
ACSS2	-1.33785438137745	9.94969712278169	-17.9067676909721	1.7345828808709e-38	1.83762648011832e-36	77.0166225764525
CA10	-4.27207131186232	5.84900526571994	-17.8772010042311	2.04547810069814e-38	2.15534006965499e-36	76.8525947522988
RP11-320H14.1	-4.67577470373946	4.94958239259525	-17.8752191912937	2.06821504335255e-38	2.16764420506239e-36	76.8415964129063
CYP17A1	-4.20478588852937	7.39230650697778	-17.870859697218	2.11912757513056e-38	2.2091904970736e-36	76.8174011361078
PDHA1	-1.07988754321161	11.3516314271387	-17.8607321936241	2.24231199467949e-38	2.32524194622875e-36	76.7611844136214
SLC22A7	-3.71393659536362	8.32191000604504	-17.8037449057595	3.08230469791834e-38	3.1733426565078e-36	76.44462264893
PLOD2	2.1905167410737	11.6109922949331	17.803151041426	3.09254782077142e-38	3.1733426565078e-36	76.4413216947466
PCP4	-4.9488248189598	8.11254296256847	-17.7998210973778	3.1506197909474e-38	3.21609360847803e-36	76.4228116407796
CLIC5	-3.42859455478772	9.06944336475251	-17.7833225515983	3.4549004520863e-38	3.50842455753572e-36	76.3310819700579
DPEP1	-5.53780691462332	9.54664728588078	-17.7758953794852	3.60134555621075e-38	3.63828719361724e-36	76.2897771912387
SCNN1G	-4.31250337149915	8.01795842032386	-17.7460580035378	4.25522945410024e-38	4.27683292671337e-36	76.1237754419316
FH	-1.10174117909614	11.1724189190813	-17.7358826296914	4.50447071384958e-38	4.5042408939152e-36	76.0671397347091
NTNG1	-2.59545369566438	6.55817385182604	-17.7248183083499	4.79214882829923e-38	4.76757994344348e-36	76.0055420536818
KCTD6	-1.37871656021243	9.59525763548467	-17.7238500598595	4.81818489903503e-38	4.76927302202968e-36	76.000150886256
CD40	1.26129290180887	8.70977006763778	17.7071504657013	5.29025528088081e-38	5.21023684673282e-36	75.9071505156334
C10orf10	2.27181881382181	10.4739555575312	17.6815438764688	6.10588695894105e-38	5.98346392541429e-36	75.7644818889839
GLDC	-2.99345876653428	10.5390426978206	-17.6743514921017	6.35690689240392e-38	6.19845861613057e-36	75.7243949469063
NAPEPLD	-1.07336868120607	9.4632589095568	-17.648820565273	7.33461092499367e-38	7.11638809499757e-36	75.5820476097972
C5	-1.66021990259752	8.1455350888599	-17.6472711329348	7.39858740701257e-38	7.14309924088864e-36	75.5734062586702
MT1G	-3.49236760526184	11.9124444019826	-17.6378652486971	7.79916068568663e-38	7.49292893523394e-36	75.5209424634998
ATP6V1B1	-3.46688795082894	7.04275483882393	-17.6334724938146	7.99362538143517e-38	7.60734181905718e-36	75.4964370913627
PML	1.03293938664331	7.21085959123748	17.6334222079364	7.99587945673646e-38	7.60734181905718e-36	75.496156553778
CYP4F2	-5.94307333406791	8.01348335102843	-17.6091738908745	9.16065228611988e-38	8.63171269979151e-36	75.3608435130138
SLFN11	2.13365626160767	8.43765705618708	17.5807505447116	1.07446892338837e-37	1.00758451815735e-35	75.2021431420398
AGPAT9	-3.38031900688534	10.8149446664458	-17.5589035436049	1.21468306771931e-37	1.13364635448718e-35	75.0800959916651
TSPAN33	-1.61607395956036	10.4787554262702	-17.5544252559692	1.24561927201378e-37	1.15700910484351e-35	75.0550712457704
LOX	3.67939446030608	9.38218425118584	17.5333702174478	1.40201081883017e-37	1.29613254897417e-35	74.9373833482332
MAP6	-1.56532064207957	7.0118039914075	-17.5125458869841	1.57607497278832e-37	1.45021095735579e-35	74.8209331510813
FHIT	-1.52701197083499	8.76072982158931	-17.5016674548112	1.67546918286787e-37	1.53446357546857e-35	74.7600801923817
ACOX2	-2.4706605830595	10.0271146555821	-17.4919626573077	1.76943941997866e-37	1.61298805544938e-35	74.7057805846454
GLOD5	-2.8041885527901	6.95445631049677	-17.4825188207061	1.86595985293361e-37	1.69309940544657e-35	74.6529303618636
C4orf47	2.06422705511245	8.21744665793413	17.4775053893929	1.91932916877985e-37	1.73349918796849e-35	74.6248695693599
ASS1	-3.14823075538591	13.2523814574383	-17.4598337927035	2.11996708303006e-37	1.9059282046012e-35	74.5259357169327
CTSH	-1.66794030594082	13.5932036569994	-17.4540982203065	2.18951093508728e-37	1.95581205254317e-35	74.4938173546091
FGF1	-3.57198856485897	8.50114977897389	-17.45362004109	2.19541125342874e-37	1.95581205254317e-35	74.4911394454438
SPHK2	-1.45624097175893	8.27673176761089	-17.4480612297903	2.26518464073645e-37	2.00883953727573e-35	74.4600068895782
RNF145	1.34795294522124	10.4885455594462	17.4439354608179	2.31840593215819e-37	2.04677648037695e-35	74.4368978353464
MLKL	1.33381264151031	9.32135942436043	17.4326026399789	2.47114480086191e-37	2.17183708305348e-35	74.3734106379014
CCND1	2.25976583440568	11.1310230729885	17.4251341010441	2.57728425878131e-37	2.24545792210867e-35	74.3315630993912
TMEM178A	-2.6560500285013	9.59086993582977	-17.4214325412959	2.63157313814357e-37	2.2821328289591e-35	74.3108201659212
NPHS1	-4.21199137677679	6.64115258164887	-17.4181114576686	2.68125801499888e-37	2.31497690907327e-35	74.2922079808379
OAT	-1.54968081886387	12.8416734741397	-17.4170505492527	2.69732726026236e-37	2.31863670938079e-35	74.2862621096537
HOGA1	-2.60863403581525	11.0907320156985	-17.390512289029	3.13231995659121e-37	2.68080082223717e-35	74.137484960633
NDUFS1	-1.15835062570527	9.60847710961954	-17.3586335712408	3.74897530124953e-37	3.19461595344303e-35	73.9586587153885
PLA2R1	-2.33830124077407	7.22099341473053	-17.3558011424036	3.809338001054e-37	3.2320006702449e-35	73.9427641898295
GATA3	-2.53439385264617	9.28991904804039	-17.3243691027286	4.54838558696495e-37	3.84240556547095e-35	73.7663160989044
SLFN13	2.61317333912071	7.04598194956048	17.318157425525	4.71065880044923e-37	3.96241209570835e-35	73.7314322599032
ARL2	-1.12613885396342	10.5487398302299	-17.3010574968689	5.18802915025991e-37	4.34530697931385e-35	73.6353782663985
CHN2	-1.40056648688505	8.05444890456516	-17.2990587596101	5.24690629708845e-37	4.37591985177177e-35	73.6241486895085
BSND	-2.13225986867392	6.79449284839522	-17.2841707660019	5.70709346504028e-37	4.73954766192053e-35	73.5404882156353
MDH1	-1.12298065140366	13.3356744413943	-17.2643003153371	6.38503322291825e-37	5.28018000573733e-35	73.4287892690579
ALAD	-1.92442123803211	10.0978367894425	-17.2527876168473	6.81422325754687e-37	5.61142695901937e-35	73.3640511250798
MACROD1	-1.76954983677391	8.69393133065137	-17.2456074337314	7.0964402237191e-37	5.81937790563475e-35	73.3236677166041
DHRS11	-1.7727580412115	8.51380866895181	-17.2433017986849	7.18952864311906e-37	5.8711488281871e-35	73.3106988868756
PHKA2	1.78053027103043	9.43864979049021	17.2291284860642	7.78930864875954e-37	6.33455021605968e-35	73.230962630059
TREM2	4.41659573223036	7.12275406939809	17.2260824279712	7.92462919813535e-37	6.41796725844028e-35	73.2138230490061
ABCG1	1.58389902638235	8.92748844122851	17.2243691832345	8.00177390252765e-37	6.45377640805101e-35	73.2041824760107
MAN1C1	-2.57916822148904	9.52142831263311	-17.2016603454195	9.09845702237859e-37	7.30822373695074e-35	73.0763656046085
CRYAA	-5.25111773300335	7.56186476380374	-17.1813127080074	1.020871739038e-36	8.16655722996157e-35	72.9617877631072
EPM2A	-1.18191363152306	7.99430596629545	-17.1487042054823	1.2278586371729e-36	9.70614321599589e-35	72.7780684550761
PVALB	-5.09185165300051	7.34552191296548	-17.1482260990632	1.2311878591741e-36	9.70614321599589e-35	72.7753738412563
LIPA	1.71701732980688	12.6672503063141	17.147946461171	1.23313927281136e-36	9.70614321599589e-35	72.7737977862722
SLC15A2	-1.61441250567713	8.08756362529117	-17.1424890085115	1.27185093122521e-36	9.97080256043317e-35	72.7430374585947
CASR	-2.30773841486273	6.4327206514947	-17.1399420670411	1.29033243343888e-36	1.00753885908241e-34	72.728680722987
MTCH2	-1.12861478456465	11.565453034002	-17.1231168859717	1.41938169428453e-36	1.10390721532867e-34	72.6338207578683
HLA-F	1.78710625545521	12.5257489101532	17.1136921506427	1.49725060880372e-36	1.15986619296222e-34	72.5806700017079
INSIG2	1.31815006687425	10.7330648163417	17.0910344757959	1.70245486760009e-36	1.30494570238735e-34	72.4528500947574
AFM	-5.2321349968998	8.1936903256165	-17.0908631620059	1.70410936695392e-36	1.30494570238735e-34	72.4518834274374
SUCLG2	-1.24124699127619	11.9112906066492	-17.0902100470757	1.71043177925326e-36	1.30494570238735e-34	72.4481980837926
ALS2CL	-1.61487073953496	8.37448500539333	-17.0901345572216	1.71116406711337e-36	1.30494570238735e-34	72.4477721126253
AFAP1L1	1.37810016383601	8.04537072034572	17.0815101293929	1.79693057937889e-36	1.36504040407933e-34	72.3991021992077
SLC35G2	1.44731604476827	7.82502087639831	17.0685000079383	1.93454452036218e-36	1.46390494419221e-34	72.3256664188939
PTPRE	1.50040425636048	7.97922652171988	17.0606157477707	2.02303723044032e-36	1.52498102613076e-34	72.2811541207419
SUSD2	-2.87452347768232	9.08825532416975	-17.0490656057218	2.16006365869055e-36	1.62203400945119e-34	72.2159323569931
TYRP1	-4.94966407555719	7.05424233432341	-17.0452596264687	2.20722681193699e-36	1.6511235987463e-34	72.1944372483222
CTH	-2.10199148433737	8.69854976084999	-17.0228818656121	2.50619506670304e-36	1.86763943392825e-34	72.0680201853388
PRDM1	1.62087953327114	8.54705945518003	17.0076257705299	2.73300200182573e-36	2.01368820427754e-34	71.9818020305354
FMO5	-2.48550119617826	7.83269960787916	-17.0042892342609	2.78528832707051e-36	2.0445268135676e-34	71.9629423981466
REEP6	-3.6216122065233	7.79764884933874	-16.9927468089133	2.9740346209322e-36	2.17492927371829e-34	71.8976894652614
ACOX1	-1.41288861248581	9.3904990987125	-16.9852926118143	3.10269776921747e-36	2.25753533257352e-34	71.855540442254
TNNT2	-2.60274533346237	6.22319725686356	-16.9839407562613	3.12662294969678e-36	2.26120602181207e-34	71.8478958259197
VIM	1.76948662684492	13.2721151599837	16.980969076201	3.1798686712559e-36	2.29125904735089e-34	71.8310905177742
BDH2	-1.69863039957404	12.6280617387119	-16.9734017012775	3.31960438253123e-36	2.367909830544e-34	71.7882912794845
IFI16	1.87686768266878	10.9038287151184	16.973248716848	3.3224919812215e-36	2.367909830544e-34	71.7874259689978
FN1	2.43139950093033	11.8735016785553	16.9628299918498	3.52519581500481e-36	2.50327220211157e-34	71.7284892751798
OGG1	-1.27417960130219	8.79669084988932	-16.9496127428997	3.80030620513792e-36	2.6888881340974e-34	71.6537040071104
SLC34A1	-3.59546003031455	8.10935236140705	-16.9452958089094	3.89475016795594e-36	2.74579886840894e-34	71.6292737905467
EFHD1	-2.76502994303751	11.3723976242117	-16.932930924457	4.17850334111038e-36	2.93528627177141e-34	71.5592871598033
SETD7	1.03470612226084	9.72311833301018	16.9227621272687	4.42734356138878e-36	3.09898237355924e-34	71.5017175501792
GALM	-1.64302598613945	10.8370466375992	-16.9173153329398	4.56669351413346e-36	3.18514683927052e-34	71.4708762276776
CTXN3	-5.39100592324863	8.0621809918087	-16.9101261734902	4.75738171292759e-36	3.30638029048467e-34	71.43016395258
CASP1	1.80656816936242	9.85645510480068	16.9051186673788	4.89490474054187e-36	3.38993773886502e-34	71.4018029203878
FAM49A	2.01932560129134	7.30742368250456	16.896960266131	5.12755923322005e-36	3.53855751450281e-34	71.355590034443
HEPACAM2	-5.33269004073666	6.65258500190351	-16.8921174463541	5.27087858835702e-36	3.62469998081436e-34	71.3281545225418
SLC6A3	4.0873873184001	8.15016968535358	16.8850333629588	5.48779930231792e-36	3.72428173847076e-34	71.288017011833
NR3C1	1.13051377333129	11.2361633288355	16.8850194346111	5.48823450635139e-36	3.72428173847076e-34	71.2879380899739
PPP1R3C	2.0564437801954	9.64263364326066	16.8849087043024	5.49169560905173e-36	3.72428173847076e-34	71.2873106607222
ATP6V0E2	-1.77157258788336	10.0271033514215	-16.8828421028581	5.55669488510325e-36	3.75536769148754e-34	71.2756004565352
CENPU	1.36836651810765	7.33244875274142	16.87919371151	5.67333531317646e-36	3.8210205774208e-34	71.2549260022634
MRPL34	-1.03053714756313	10.6930870850892	-16.8756752541497	5.7881485145408e-36	3.88499735398922e-34	71.2349864159648
RASL11B	-2.45798785038289	7.81035344988828	-16.8657238112629	6.12566242081504e-36	4.09750367868785e-34	71.178582593326
NKIRAS1	-1.00626203886765	9.28660301241788	-16.8639765860757	6.18692794360529e-36	4.12440818934422e-34	71.1686783281382
DUSP9	-3.30300576481468	7.61825728880031	-16.8572645276108	6.42805573889996e-36	4.27062591276951e-34	71.1306273443933
GPR110	-3.47105452125257	6.51147388855792	-16.8408600294679	7.05782769851322e-36	4.65745336912998e-34	71.0376079448779
ALDOB	-5.2597790612875	11.3511819670395	-16.8180216962957	8.03904183176929e-36	5.28715372016263e-34	70.9080556229285
TRIM9	2.42958288715652	7.09990404892939	16.8033461762588	8.74067555336298e-36	5.72938127660071e-34	70.8247763916937
PDP2	-1.30699502428809	8.64763678220748	-16.8007884435406	8.86910381791091e-36	5.77553788723016e-34	70.8102595255489
GLYCTK	-1.66176241664759	8.16817382511892	-16.8007701611164	8.87002859358272e-36	5.77553788723016e-34	70.8101557577449
APOC1	4.23323588478183	9.30127376164558	16.7926082956773	9.29269441491323e-36	6.03071251118823e-34	70.7638266850861
CMTM4	-1.63174616202081	10.3802502595213	-16.7896779811628	9.44932369789665e-36	6.11212195231276e-34	70.7471915510562
ALDOC	2.10279376310949	9.56750060778524	16.7838627952147	9.76804230522186e-36	6.29749543223827e-34	70.7141763906071
C6orf136	-1.16705091848187	9.57123320362886	-16.7721502095787	1.04431090641618e-35	6.71063916552482e-34	70.647667735533
SPAG4	3.38443142410321	8.78279068983197	16.7713435541083	1.04912889289782e-35	6.71956770323673e-34	70.6430866603697
CYB5D2	-1.0386672447265	9.93410693855176	-16.7644547550721	1.09119354787037e-35	6.966222262121e-34	70.6039615127574
ALDH2	-1.52572890524288	13.335249347826	-16.7596088474224	1.12179393117793e-35	7.13832443414163e-34	70.576435828859
MAGI2-AS3	-1.86766968845851	8.66969180037221	-16.7518321412959	1.17271149253391e-35	7.42261291010914e-34	70.5322571251209
FBP1	-2.96741943468248	11.4532275856175	-16.7509908400822	1.17835704848428e-35	7.42592276310076e-34	70.5274773677784
PLCL1	-2.34809707890634	9.04664593874968	-16.7496978335186	1.1870869882436e-35	7.45696085980329e-34	70.5201311426013
SLC38A1	1.82208820793787	10.7449049570315	16.7465727942541	1.20845510969839e-35	7.56693664376316e-34	70.5023754355818
MCOLN3	-2.45073429958055	7.4257713718502	-16.7272690849363	1.34927700537856e-35	8.42180892624662e-34	70.3926721681373
DDN	-3.86050258813738	6.31976007755393	-16.702168378965	1.55730779873594e-35	9.68942080870657e-34	70.2499619519349
EPB41L4B	-1.88863326335918	6.73771800002498	-16.7011766502864	1.56615774679095e-35	9.71364736688475e-34	70.2443220226921
OLFML2B	2.22274640388358	8.63848667398637	16.6891502084842	1.67758195077169e-35	1.03719017833358e-33	70.1759192711015
RGS1	3.76102991200685	10.6919556123491	16.6741007693462	1.82828774332625e-35	1.12681168180664e-33	70.0902998421144
FAM3B	-4.25017655389317	7.71871258710296	-16.6695876516123	1.87607701044344e-35	1.15264054318749e-33	70.0646188323581
MET	1.31118733314449	10.997342295242	16.6447567767152	2.16233758983857e-35	1.32436420072644e-33	69.9232829642315
RAB25	-4.47782793161401	7.11077364275673	-16.6303773853523	2.34774743959369e-35	1.43344243204351e-33	69.8414049046941
PCK2	-2.66479751904173	11.2201732799843	-16.6222703226671	2.45922936014487e-35	1.496845845636e-33	69.7952321287807
PCYT2	-1.3821077607585	7.88139761781576	-16.6023832149967	2.75572448325688e-35	1.67211901384989e-33	69.681936622549
CLDN19	-2.32074542035543	8.07356903618861	-16.5779036850561	3.17040484543784e-35	1.91780137548569e-33	69.5424181423598
HLA-B	1.27493965256717	14.1490492948825	16.5716837316351	3.28539725611815e-35	1.97823870819392e-33	69.5069576013607
LDHA	1.23272631837454	14.6479700341819	16.5714126138638	3.29050369340895e-35	1.97823870819392e-33	69.5054118359907
PAPPA	-2.74458681336233	7.69662022291477	-16.555325120097	3.6082072200122e-35	2.16260713471006e-33	69.4136751846351
PHYHD1	-2.78189738992697	8.65910190886293	-16.533233590375	4.09524587737047e-35	2.44703426678609e-33	69.2876547836254
ARHGAP24	-1.60523851025731	9.97029277336331	-16.5230765959538	4.34080001128542e-35	2.58587657815146e-33	69.2296964805188
MORN2	-1.1030061808623	10.0752150836227	-16.4902977689827	5.23864395632223e-35	3.11127826969574e-33	69.0425749924663
SCN7A	-2.73533660680595	5.70066773438349	-16.4860233664338	5.36870810690795e-35	3.17889154644378e-33	69.018165398728
SCNN1A	-3.74487035250842	8.92662830804591	-16.4826089799917	5.47492715643199e-35	3.23202100418406e-33	68.9986656105717
IYD	-4.5724087825362	7.04967563719373	-16.4578070815108	6.31248750515504e-35	3.71526854695296e-33	68.8569819528342
NR0B2	-2.99562221352252	6.0313235191338	-16.4554866452376	6.39714258238986e-35	3.75382028360057e-33	68.8437227506788
SLC43A3	1.69311602161883	8.46621125157541	16.454609578434	6.42943589644156e-35	3.76150788460771e-33	68.8387109508486
HIGD1A	-1.3924833635216	12.1346505781572	-16.447037000812	6.71514687797616e-35	3.91696915659091e-33	68.7954356693473
CCDC88A	1.13177805103073	6.98579666032658	16.4412232750207	6.94311253027436e-35	4.03792470269577e-33	68.7622075068632
PDHB	-1.12022298726	11.791723747912	-16.4379397159975	7.07528087055649e-35	4.10261626574073e-33	68.7434387988296
SIGIRR	-1.64343515949404	9.82158326006207	-16.4300369537635	7.40382157271275e-35	4.26786761775286e-33	68.6982620598083
PRKCDBP	1.984566939917	9.65753542211537	16.4128526249309	8.17202793732555e-35	4.69687904820069e-33	68.6000030217375
RP11-274H2.5	2.56391792828057	8.05038743944091	16.4048394774968	8.55710638771964e-35	4.90382245885723e-33	68.5541732859195
ELTD1	1.91423622193629	10.2112556249259	16.3910427646391	9.26326703951206e-35	5.27175805682745e-33	68.4752491249944
JAZF1	1.17894479383258	8.57856990761892	16.3907317266933	9.2798435104111e-35	5.27175805682745e-33	68.4734695923133
MBOAT2	-1.34150291392562	9.15506136068957	-16.3895113700418	9.34516920775047e-35	5.293525182159e-33	68.4664874984244
SC5D	-1.1558751496246	9.89207198195022	-16.3808656486869	9.82137922855146e-35	5.54723952450663e-33	68.4170176204631
GAS6-AS1	2.20481647584175	6.51919967225768	16.3801299050539	9.86301138508827e-35	5.55474598092945e-33	68.4128074004305
PROM2	-2.37066220095243	7.84146309001307	-16.3772856077133	1.00256284337457e-34	5.63015162386771e-33	68.3965306378695
SH3GL2	-5.05331383567808	7.47301203053743	-16.3700247202717	1.04530590558495e-34	5.85341441244553e-33	68.3549755352477
TUBAL3	-4.35805418901657	6.8783699455487	-16.3687617685514	1.052925112654e-34	5.87928184698167e-33	68.3477468969341
SLIT2	-2.54971290049537	9.27272015364701	-16.358886099295	1.11445730220415e-34	6.20518428008498e-33	68.2912164907106
RP11-38P22.2	2.45548795413693	6.9837221830743	16.3563647887932	1.13073676568573e-34	6.27799146478034e-33	68.2767822855919
ITGA4	2.1402295359984	7.92493801991763	16.3550104992732	1.13957934375848e-34	6.30921343455439e-33	68.2690288535742
ANXA9	-2.76193354595003	7.87306195594363	-16.3498129246413	1.17416480891589e-34	6.48238199716693e-33	68.2392704168513
FPR3	2.33578816156442	7.98215465260325	16.3411492172681	1.2341711578489e-34	6.79452823670803e-33	68.1896603220431
ARHGDIB	1.59993757983417	11.3641635388382	16.3333773644586	1.29061410196701e-34	7.08536296483232e-33	68.1451502538844
NOS1	-1.52045175021033	5.92651156789793	-16.3322746627993	1.2988295654724e-34	7.1105476686295e-33	68.1388344578993
DNAH11	2.58328955525962	6.11981166989804	16.3314138769306	1.30527912933441e-34	7.12595143616298e-33	68.1339041591314
TAP1	2.01960571618803	10.4914820531446	16.3278487134454	1.33233556121417e-34	7.25345685117683e-33	68.1134832211049
VWA8	-1.28916860256769	9.8587101853757	-16.3233616426556	1.36718965392109e-34	7.42259003523529e-33	68.0877797291649
GMFG	1.71826809280119	9.45948436074782	16.3131701126227	1.44979074503376e-34	7.82767184901285e-33	68.0293910499103
ESRRG	-3.14707896779388	9.73104057630057	-16.3113362056449	1.46517735197651e-34	7.8890139893922e-33	68.018883154727
PROC	-3.54498600601492	7.20205514408585	-16.3072973745128	1.49964361151769e-34	8.05246990195486e-33	67.9957402365774
SLC4A9	-3.29458834555603	6.8137035738567	-16.3064384614382	1.50707758237414e-34	8.07027692266414e-33	67.9908183495228
PPAPDC1A	-3.47007088212001	7.3026968265674	-16.2948563905648	1.61100808314367e-34	8.6033099241234e-33	67.9244410726898
MSR1	2.16976366512803	7.4793992149084	16.2933670015674	1.62488465167221e-34	8.65383540438144e-33	67.9159042811119
ACOT11	-1.45620173858574	7.43170877363208	-16.2779920418383	1.77533306646183e-34	9.42947229528061e-33	67.8277650532416
IRX2	-2.89638780633419	7.00122668721755	-16.2685689272411	1.87436970386484e-34	9.92858698001273e-33	67.7737331012018
DOCK4	1.15541670395086	9.70952357286359	16.261888235849	1.94792386174444e-34	1.02903934680133e-32	67.7354203752902
TM6SF1	1.84503963398639	8.28604004493088	16.2595977611447	1.97380289330797e-34	1.03990760499847e-32	67.7222837570623
SACS	1.47254816580912	8.73273467750026	16.256725887673	2.00673881531753e-34	1.05442557751765e-32	67.705811832771
MAP4K4	1.07248953808394	9.0683533892403	16.2450115381127	2.14689503055939e-34	1.12505336106774e-32	67.638613826765
DEFB1	-3.24304142649081	12.9457878234743	-16.2358314523607	2.26356086060816e-34	1.18302744818825e-32	67.5859430626298
CRHBP	-3.7408941079005	7.7034163752988	-16.2211391559682	2.46366060711068e-34	1.28418309145644e-32	67.5016272251342
PAQR5	-1.89430419359826	10.7329273974927	-16.2146278851326	2.55792573808208e-34	1.32978213635731e-32	67.4642531098603
NR1I3	-2.74427110306327	5.83253174963749	-16.2132663977005	2.57808917585834e-34	1.33671877665734e-32	67.4564377212028
CCBE1	-1.98981097699478	6.31460133124923	-16.2110513333557	2.61123527810272e-34	1.3503324595128e-32	67.4437220958773
PCCA	-1.68186065293991	9.88130857197859	-16.1952292589721	2.86076453064605e-34	1.47547694831926e-32	67.3528799207023
ALDH4A1	-2.56948054611394	9.66004587945202	-16.1915843314702	2.92155931065317e-34	1.50287771468482e-32	67.3319488515701
BCKDHB	-1.39425307682016	8.56351856852246	-16.1834773492013	3.06146608487733e-34	1.57072444496101e-32	67.2853892749148
CYP2B6	-2.80719808578771	6.66897965361392	-16.1811865788125	3.10220353838036e-34	1.58746963834769e-32	67.2722317813024
SLC5A2	-3.51704384359302	8.80969068621473	-16.1799378664269	3.12463831572237e-34	1.59478610286049e-32	67.2650593193839
CHST15	2.22124813287764	9.62575308165179	16.1782958946598	3.15438643612667e-34	1.60578752627653e-32	67.2556277680783
DNMT3L	-4.60407428319784	5.81168769249862	-16.1755718929359	3.20436601995789e-34	1.62700439443406e-32	67.2399803616905
BPHL	-1.99069399462765	10.5608388476662	-16.1647679490064	3.41054370445279e-34	1.72721566055737e-32	67.177911810153
GCDH	-1.32601562043357	9.0294690186414	-16.1444928739203	3.83407147775343e-34	1.93670017764148e-32	67.0613982869621
PSMB9	2.14549734634022	10.6217373963693	16.1422121708039	3.88490041481251e-34	1.95733067429075e-32	67.0482891864536
NUSAP1	1.68498382367743	8.51738693137927	16.1368188187923	4.00780527868635e-34	2.01407629889677e-32	67.0172869103176
RNF212B	-4.54084169667043	8.09122891530552	-16.1277322403632	4.22375861149277e-34	2.11717250707537e-32	66.9650481295583
PC	-2.53755691665932	9.17171163983843	-16.1234708591284	4.32901908164018e-34	2.16439910665984e-32	66.9405464241542
MCCC2	-1.24010068969634	10.0461513461321	-16.1229312830631	4.34253351479579e-34	2.1656314085619e-32	66.9374438815748
CADPS2	-1.23671625374638	10.2534353383129	-16.1058679743822	4.79245627647582e-34	2.38394290768146e-32	66.8393146349798
PIPOX	-3.54240144674053	10.7995313202575	-16.103970309982	4.84529885349911e-34	2.40412689189187e-32	66.8283994748151
HLA-G	1.72872649409828	13.0175908249302	16.0900309436832	5.25179857400759e-34	2.59470140951799e-32	66.748210125285
FECH	-1.26231791288849	9.41175072230399	-16.0858678925631	5.37971092665649e-34	2.6491697098377e-32	66.7242572695052
IRX1	-3.14777450903718	7.89727244930956	-16.0813771533488	5.52119806990004e-34	2.71202909704188e-32	66.6984169591144
AMT	-1.36708618300447	9.97728971518626	-16.0764723910194	5.67999826899306e-34	2.78305715184987e-32	66.6701918835876
CCNA2	1.45395265928787	6.94850351073635	16.0748077657081	5.73492830049023e-34	2.80296408382314e-32	66.6606120122915
PLXND1	1.33862234101633	9.53632022738998	16.0678234850074	5.97126763886375e-34	2.90399192193773e-32	66.6204145050648
PLCG2	-1.24342957767654	8.91942967177776	-16.0651351342859	6.06482071690599e-34	2.94218864432279e-32	66.60494053855
FMNL3	1.26635605463999	7.30986441076791	16.0561427985737	6.38856602300991e-34	3.09159272802398e-32	66.5531757505917
FDX1	-1.38130951859358	10.4138508166877	-16.0544187457378	6.4525887878795e-34	3.11488393235592e-32	66.5432501942717
LCP2	1.90406893989665	7.91652375849493	16.052767882386	6.51449679152432e-34	3.13704232474411e-32	66.5337457058454
SSPN	1.70405803551033	8.73080416794317	16.0449336637431	6.81650440109362e-34	3.26771111682401e-32	66.4886379978778
FAM169A	-2.64235812537684	7.67738435739169	-16.0448654679502	6.81919407511108e-34	3.26771111682401e-32	66.4882453133011
NDUFA4	-1.29086835583036	13.5283850998685	-16.042582283695	6.90986106103075e-34	3.30308212036931e-32	66.4750980155732
GATA3-AS1	-2.8853745077751	4.79779046151746	-16.0414495270273	6.95529150414753e-34	3.31670944500699e-32	66.4685750417198
CCDC51	-1.11642895740532	9.7341027504257	-16.0405328026356	6.99227700775047e-34	3.32625332706072e-32	66.4632959904537
DNAJC12	-2.67969735813812	8.76228343392292	-16.03981629039	7.02132220565891e-34	3.33198290335857e-32	66.4591698201451
SYNE4	-2.83782696073055	7.14857208039108	-16.0333284268469	7.28989190695212e-34	3.45107708899407e-32	66.4218057967077
CYP4F3	-4.46112801086747	9.3760651288499	-16.0095610715615	8.3648479089103e-34	3.95042540160803e-32	66.284890532074
HINT2	-1.1908864542641	11.6626195841056	-15.9797682606961	9.93974816624143e-34	4.67168163813347e-32	66.1131816713186
PPM1H	-1.50130312569005	7.93118441447615	-15.9765540613918	1.01265200876688e-33	4.73674623384773e-32	66.0946513382659
PNPO	-1.17460421666966	10.3777535543882	-15.9675804063081	1.06668109626742e-33	4.97759114422502e-32	66.0429112210859
IFNGR2	1.00353504083759	11.5204429758165	15.9664265889832	1.07383470318869e-33	4.99907039140027e-32	66.0362579590414
PCDH17	2.03499792387872	9.45795145893703	15.9606543618659	1.11035132356179e-33	5.1568188603051e-32	66.0029714689433
SLC2A12	-2.33654342923882	6.71030796306173	-15.9581537651193	1.12655501217687e-33	5.21970488975285e-32	65.9885502983993
COL5A3	2.05649683202797	7.04254543849985	15.9576826766636	1.12963407965171e-33	5.22162696393725e-32	65.9858334156544
TUBB2A	-1.56629133711912	11.4531164246796	-15.9509306406384	1.17470486944012e-33	5.40446965637487e-32	65.9468902434159
CTSS	2.37978131528516	10.1138856450038	15.948290364168	1.19281578711713e-33	5.47494065847978e-32	65.9316608518134
KCNE4	2.1621693310125	7.1156871612493	15.9428855562705	1.23076822292146e-33	5.63594074790601e-32	65.9004831056324
MARCKS	1.62112005526119	11.08816156865	15.9397980050535	1.25299014001326e-33	5.72432488441025e-32	65.8826711479929
JAG2	1.36185490678236	8.76528756633343	15.9346614649049	1.29085449105867e-33	5.8835946907579e-32	65.8530364753312
PTGER1	-2.08295153087027	6.77996039833603	-15.9296605938104	1.32882122085399e-33	6.04259097622214e-32	65.8241819135508
FMN2	-2.03833634231557	5.51559511093257	-15.9284488260308	1.33818835060233e-33	6.07110034339237e-32	65.8171897377154
SOX11	3.34977437279907	5.62492764323139	15.9080122119465	1.50652859428178e-33	6.8090498126808e-32	65.6992430312046
VDR	-1.85766272638715	8.73769750637718	-15.9078673044376	1.50779510112938e-33	6.8090498126808e-32	65.6984065667833
TRAF3IP2	1.17502104524432	8.47251532154713	15.9025049506125	1.55542131823427e-33	7.00797756691343e-32	65.6674513855054
BICD1	1.25161427972099	8.51663415644648	15.8921096367927	1.65208928076726e-33	7.409450300631e-32	65.6074340938483
CCDC64	-1.67362160797889	9.15746453527567	-15.8857470750121	1.71420586130298e-33	7.67048417252903e-32	65.5706944027912
PRODH2	-3.16337478678009	10.5398687345958	-15.8851170073589	1.72048317079876e-33	7.68103637004213e-32	65.567055942449
LAD1	-2.24949298764053	8.19397588464386	-15.8844628750567	1.72702463044754e-33	7.69271721185028e-32	65.5632784725752
ASB9	-1.63792614199216	9.16837768778792	-15.8806872574092	1.76527213228377e-33	7.84525363279584e-32	65.5414742554481
CLIC1	1.05398792547804	12.8095142327869	15.8708496677531	1.86896709999804e-33	8.28730456852071e-32	65.4846552486571
S100A10	1.26127779845788	12.5929965473139	15.8655247609272	1.92762173424179e-33	8.5217152389071e-32	65.4538960296645
MYCN	-1.83860828100111	6.26397666486724	-15.8652651734132	1.93052786676603e-33	8.5217152389071e-32	65.4523964533672
ACSM3	-1.98037527865498	9.74308976559043	-15.8570417485639	2.02490111401126e-33	8.8982145590822e-32	65.4048880868748
BAZ1A	1.31291033443957	9.56732166312186	15.8490272680461	2.1213278057567e-33	9.30109701678422e-32	65.3585801852841
PROZ	-3.57711091453308	7.41894872804474	-15.846184216254	2.15662983643269e-33	9.41376128379607e-32	65.3421513737056
TTC36	-3.76964396615965	6.19571085352682	-15.8387898530965	2.25122938500882e-33	9.80485438150842e-32	65.2994185695499
SLC30A2	-2.71130296254532	7.67711976409615	-15.8333599708624	2.32333687924475e-33	1.00964699548376e-31	65.2680351587499
F11	-2.27247718301016	5.89750750715647	-15.8193119853453	2.52082546234743e-33	1.09253259082838e-31	65.1868272588507
PACRG	-1.62579590489314	7.38429400538398	-15.8190123085091	2.52521691742056e-33	1.09253259082838e-31	65.1850946831349
CD300A	2.52554179393872	7.36430164970354	15.8158727950314	2.57168709137441e-33	1.11018712123011e-31	65.1669430991777
ATAD2	1.2601464144	6.96552101864978	15.8104417388752	2.65411055798802e-33	1.14325083134082e-31	65.1355402413013
C16orf89	-3.31757178631781	7.62985477554153	-15.8025088121407	2.77928879691013e-33	1.19193175340573e-31	65.0896659598437
NELL1	-3.3233762051684	6.35435206476406	-15.788040123369	3.02304843703342e-33	1.29364031260738e-31	65.0059804447478
MPP5	-1.207193289316	10.5386221525583	-15.7733289215313	3.2928953503689e-33	1.40604479241569e-31	64.9208705302306
ATP1A1	-1.67185979667703	13.0750398749864	-15.7716840524753	3.32453082005676e-33	1.41646694657157e-31	64.9113529754962
WDR54	1.42512101351432	10.3720211765512	15.7668271616258	3.41973273213839e-33	1.45363418670199e-31	64.883248399585
TMEM174	-2.83774215979041	9.22732774520477	-15.7484644502253	3.80504983491043e-33	1.61069485344297e-31	64.7769703962719
IFI44	1.48783270134193	9.0323292883005	15.7358264765972	4.09525919639717e-33	1.72980571099543e-31	64.7038057736314
AP1M2	-2.3848779987612	9.00511699927441	-15.7235479943493	4.39846459562303e-33	1.85388188407776e-31	64.6327069694763
GM2A	1.44263681913118	8.73692916868427	15.7146848491234	4.63123221189531e-33	1.9478008609643e-31	64.5813753433854
CLEC7A	2.10373928383589	7.83006291298385	15.7037446010272	4.93565913061303e-33	2.07139150537227e-31	64.5180031536407
PIK3R5	1.67198855271976	6.75294750168175	15.7012613067247	5.00750919700793e-33	2.09705497333672e-31	64.5036168210258
GPR4	1.81673938389711	7.88067393057696	15.696190372654	5.15750332372449e-33	2.15526455525962e-31	64.4742377416026
GPHN	-1.55864892798536	8.99784601980058	-15.6837023909166	5.54638537726707e-33	2.30793220826024e-31	64.401876132227
UQCRFS1	-1.1499383655492	13.1885641808487	-15.6789139299681	5.70318435126368e-33	2.3681506377207e-31	64.3741252675721
RECQL	1.01414851260559	10.2432855468917	15.6704411773366	5.99159902855624e-33	2.48265009219184e-31	64.3250169992185
MFSD4	-2.94386878204095	8.86112485773913	-15.6694538328892	6.02614634410859e-33	2.4916970927887e-31	64.319293863003
IDNK	-1.79251579328745	9.30909244877928	-15.6522028261275	6.66305170967627e-33	2.73771803895063e-31	64.2192828555822
LZTS3	-2.1053877311806	9.60783854026002	-15.6443111981158	6.97650645866947e-33	2.86051360007245e-31	64.1735220652885
RAB31	1.46517834979847	10.70089581662	15.6411323711996	7.10690952303077e-33	2.90789811569687e-31	64.1550874142308
KCNJ2	2.35805468641595	8.76665806869165	15.6297782523636	7.59296711031453e-33	3.09010303718053e-31	64.0892344386646
HOXB-AS3	-2.15598071064022	6.5605354472378	-15.6296302412061	7.59951866891687e-33	3.09010303718053e-31	64.0883759015608
ESM1	2.50768976288337	9.53395358787205	15.627983070464	7.67281269904391e-33	3.11344629582943e-31	64.0788213593176
INPP5D	1.58399733150086	7.75881228123065	15.6220482096314	7.94282457772875e-33	3.21635163014268e-31	64.0443935106631
C3	3.91061058187105	12.1457343951811	15.6143284248391	8.30835453619287e-33	3.3574317640174e-31	63.9996061916138
MAGI2	-1.13358692531081	8.03210112261812	-15.6048333718783	8.78116361268894e-33	3.54119394331462e-31	63.9445113568586
KIF9	-1.1819937966416	9.32618189072201	-15.5988395101185	9.09342983932098e-33	3.65209285698467e-31	63.9097275281494
SAT2	-1.84902525563236	12.0734276416531	-15.5854556958134	9.831488594901e-33	3.94043650248394e-31	63.8320452467758
GLRX5	-1.23585454230093	11.0594243096639	-15.5831418847564	9.9650451711736e-33	3.98581470020064e-31	63.8186136471909
C1QC	2.56092490853411	10.7906822585524	15.5788276701175	1.02189464915389e-32	4.07904546410735e-31	63.7935683632286
FLT1	1.88578765306096	9.90112400658625	15.5750793707007	1.04448040691406e-32	4.16072591363998e-31	63.7718068991109
TBC1D13	-1.23812392064976	9.46073047903596	-15.5741172354991	1.05035815910343e-32	4.17565305482111e-31	63.7662208179756
SALL3	-2.27965448028728	6.04313776181017	-15.5564995296375	1.16404703834862e-32	4.60892078880698e-31	63.6639177543651
PPARA	-1.24691559712079	9.11777557589884	-15.5559309468134	1.16791493316655e-32	4.61013675376915e-31	63.6606155826596
SLC22A13	-3.64109842131555	6.03055439168555	-15.5557170827565	1.16937311836972e-32	4.61013675376915e-31	63.6593735112064
TST	-1.94254153594392	11.8233915135363	-15.5554186689908	1.17141083901068e-32	4.61013675376915e-31	63.6576403877213
PPM1K	-1.28838530140455	9.18521661910406	-15.548335520269	1.22083761395834e-32	4.78548863549622e-31	63.6165004131383
PLXDC1	1.75493426465539	8.40019041063038	15.5483337527204	1.22085020549422e-32	4.78548863549622e-31	63.6164901463427
PRELID2	1.28467061715493	8.20863757618264	15.5446233290084	1.24757144565726e-32	4.88046961346042e-31	63.5949374981901
HAGH	-1.55305385180596	10.7360797231692	-15.5300252917587	1.3585192340509e-32	5.30390806138717e-31	63.5101291821536
HAPLN1	2.54622211007262	6.48601317692498	15.5285818593106	1.37001342765694e-32	5.33814973531776e-31	63.5017423310622
GIMAP4	1.41095376860074	9.87308076265365	15.5278510480176	1.37587008804044e-32	5.35033290783819e-31	63.497495982514
P4HA1	1.45039782817106	10.09418475474	15.5039184727839	1.58219110724552e-32	6.14046802196137e-31	63.358408021045
GJA1	2.20330789668221	12.1359915894892	15.503279461894	1.58810603172567e-32	6.15124310588761e-31	63.3546935445153
CHSY1	1.48842449136935	11.4792784578716	15.5011742752577	1.60774974991764e-32	6.2150468143266e-31	63.3424561230897
FAM57A	1.99525859647368	8.19818377259345	15.4793795437769	1.82600915633012e-32	7.0448727273453e-31	63.2157383905361
ANLN	2.1565014699943	6.47395300697624	15.4786145589025	1.83418768816568e-32	7.06252347747726e-31	63.2112898218377
GJB1	-1.81557579653665	8.63719479157495	-15.467264327132	1.95994117035049e-32	7.53193862699984e-31	63.1452788827781
NR5A2	1.64077289461219	5.90916674146301	15.4595340034932	2.05050341344128e-32	7.84918289063198e-31	63.1003135673935
STK10	1.35557159473939	8.27019685572301	15.4585242967533	2.06263813453579e-32	7.88024265083178e-31	63.0944399359319
PLCXD3	-3.15622739841667	7.36581214147527	-15.4548067665845	2.10793965016824e-32	8.03764770498977e-31	63.0728135997797
TNFRSF10B	1.19533184599836	10.0218006359056	15.4544294011443	2.11259361427933e-32	8.03975189247777e-31	63.070618242032
LRRC2	-2.54618774168564	7.63038146515956	-15.4507067802487	2.15905970252995e-32	8.20066106780707e-31	63.0489608215172
EHF	-3.47526228624992	7.05575766496495	-15.4494243406212	2.17530346168269e-32	8.24637766837892e-31	63.0414995501236
DAK	-1.55763433470691	8.72085200400081	-15.4478660975767	2.19520564569227e-32	8.30575973936733e-31	63.0324334332975
APAF1	1.12201464118415	7.26273103495629	15.4333945328981	2.38898760296311e-32	9.02153526598728e-31	62.9482243113469
SLC5A11	-4.02257369934603	6.30726868506869	-15.4192974586646	2.59424071531215e-32	9.77779303450056e-31	62.8661749906162
CADM4	-1.83234114406795	5.79282996988119	-15.4179997173268	2.61400257961385e-32	9.8333659420061e-31	62.8586207780971
CCDC181	-2.63776267727783	6.60858007616499	-15.411227498075	2.71960518426726e-32	1.02110233728839e-30	62.8191967593443
LIN52	-1.31511914899787	9.34312258734595	-15.4096667815911	2.74454265359539e-32	1.02849505674601e-30	62.8101105310472
FREM1	-2.62521124200599	7.01631096410069	-15.4089512522562	2.75605207477951e-32	1.03083711094663e-30	62.8059447619745
RP11-297L17.2	-2.6896054370054	6.41316855467792	-15.3953313253283	2.98459837712133e-32	1.11419321129906e-30	62.726641030894
ARHGEF10	1.08154228844832	8.86214090913387	15.3910741365013	3.05986273971644e-32	1.13924066648773e-30	62.7018493826483
GGH	-2.22345481985695	11.1176771457481	-15.384713929521	3.17586793209599e-32	1.17886052274904e-30	62.6648076339488
TM7SF2	-1.54355728740899	8.72331396943424	-15.3823493795504	3.22011132584499e-32	1.19302385397421e-30	62.651035548148
EGFR	1.83317781951795	9.61741302833975	15.3811204193321	3.24335012292515e-32	1.19936639734358e-30	62.6438773814986
ARHGEF3	-1.08162088263238	11.0634470117759	-15.3799021081198	3.2665535506418e-32	1.20567199696853e-30	62.6367810988331
TOP2A	2.68981120674164	6.16939354539899	15.3793243221513	3.27761593253e-32	1.2074811026627e-30	62.6334156264654
SCD	2.34880715315455	9.11355725169083	15.3785908599582	3.291713047569e-32	1.21039932494005e-30	62.6291433295953
ACAD8	-1.31249069916691	10.3260179222369	-15.3688626964133	3.48454210124678e-32	1.27651477836141e-30	62.5724735343035
RASSF2	2.2732844603569	8.92735015265855	15.3636462469258	3.59256577969817e-32	1.3111861585904e-30	62.5420822733557
RALGPS1	-1.08832262056164	7.2396461356286	-15.3575698909394	3.72263830111852e-32	1.35361758930653e-30	62.5066779034758
ATP2C2	-1.3314922216381	6.76305079082769	-15.3559920155626	3.75718044799448e-32	1.36205898048407e-30	62.497483714771
MT1HL1	-2.60256808441909	13.4725845524264	-15.3558751037942	3.75975258146783e-32	1.36205898048407e-30	62.496802467256
ABCC3	1.87669244246004	9.29804386003099	15.3429018238716	4.0564242923111e-32	1.4614312445773e-30	62.4211988290159
ECI2	-1.51995547569799	12.0176347071632	-15.3422267220887	4.07248962942126e-32	1.46452705040417e-30	62.4172641410789
PROCR	1.50157858685064	9.30913553155388	15.3397361619681	4.13231110443654e-32	1.48331804644417e-30	62.4027480654655
ADH6	-3.28210825485707	8.74678670893976	-15.3384294214249	4.16404971825757e-32	1.49197825279945e-30	62.3951315744796
CSPG4	2.73311213957417	6.84745159987759	15.3197878249092	4.64437254728774e-32	1.65801562029677e-30	62.2864592804344
FXYD5	2.04382810750097	9.52336589565818	15.3068640486675	5.00961590550567e-32	1.78515385694556e-30	62.2111001366429
SIPA1L2	1.49058855654986	8.95657041973852	15.3006030433939	5.19678249821051e-32	1.84848893253045e-30	62.1745862743498
RAB11FIP4	-1.17107693045046	7.37090752644187	-15.2968838563753	5.31126739317474e-32	1.88578858041362e-30	62.1528944230841
KCNK10	-1.91668211689753	6.47523516472804	-15.2944989241107	5.38600835260372e-32	1.90886758956022e-30	62.1389838194305
DUSP4	2.57042745403615	6.73491739885988	15.2905742363045	5.51130629234945e-32	1.94974895349742e-30	62.116091116382
RP11-456H18.2	-2.7357574169806	5.82328559048631	-15.2835008371799	5.74455620454196e-32	2.02374709190527e-30	62.0748283356145
CLEC2B	2.01841782986406	9.46814696934707	15.2832961209559	5.7514522689486e-32	2.02374709190527e-30	62.073634050654
SCN2A	-3.0627105528124	6.33553589543977	-15.2797953032301	5.87067381363377e-32	2.06199527013276e-30	62.0532101772545
APOO	-1.40698865764674	10.0304261389314	-15.2756714222467	6.01429697185545e-32	2.10866200986395e-30	62.0291498636737
LAPTM5	2.19076762076795	11.4073987876454	15.2715072218474	6.16289995317163e-32	2.15690493182519e-30	62.0048526977267
FLJ22763	-4.88010193255233	7.44177952784931	-15.2628869197527	6.48232660375551e-32	2.26062489514243e-30	61.9545500413904
MT1H	-3.05399025331978	13.2026854456627	-15.2583109702882	6.6585812955398e-32	2.31796687053791e-30	61.9278448639385
PRC1	1.81523336607766	7.64499062560926	15.2560933412173	6.74571990153348e-32	2.34413766578289e-30	61.9149021093237
TNNC1	-3.36496409265747	4.58968040404959	-15.2502600076985	6.98043159831152e-32	2.42140670611164e-30	61.8808548216508
KRBA1	1.78397695445204	8.82375834680054	15.2473204795478	7.10179281104987e-32	2.45915260254004e-30	61.8636965429724
PKM	1.59177143168125	11.2591321151949	15.2377217103978	7.51301743584325e-32	2.57616172350941e-30	61.8076621062335
EHBP1L1	1.66512639981302	7.55762170036214	15.2376957960175	7.51415935784984e-32	2.57616172350941e-30	61.8075108150726
RAB29	-1.44487203358399	10.9045994539091	-15.2375957428015	7.51856985482618e-32	2.57616172350941e-30	61.806926692196
TMEM207	-3.21576868114697	7.06268437523195	-15.2297312928872	7.87349295846013e-32	2.68837262182683e-30	61.7610101676118
CAT	-1.11191340433527	12.5503773037964	-15.226716550834	8.01396072069568e-32	2.73157593330286e-30	61.7434071004132
ODF3B	1.23239475590916	7.32066824273084	15.2245971368735	8.1142135374119e-32	2.76094567916208e-30	61.7310313462204
SLC51B	-4.03630804148396	6.74976888125655	-15.2223140850213	8.22361418872943e-32	2.7884881398773e-30	61.7176996064958
RRM2	2.05382749501977	7.92917470131434	15.2190169235215	8.38422519330982e-32	2.83478737307858e-30	61.6984451844994
BTN3A2	2.1002238460002	9.4856739757566	15.218918156764	8.38908452668796e-32	2.83478737307858e-30	61.6978684011012
PRR15	-2.77048489807691	7.34900049626785	-15.2154141863189	8.56331974912194e-32	2.88868336941551e-30	61.6774051428712
KCTD1	-1.54348797842791	8.62630420850923	-15.2024903506423	9.23792483205485e-32	3.10555898427861e-30	61.6019198685669
LDHD	-3.60798264785443	7.25574684449	-15.2006500581627	9.33822571841177e-32	3.13390215505398e-30	61.5911698716165
LAIR1	2.02704377924819	8.21915236272656	15.1886451924812	1.00198640059875e-31	3.35691136159572e-30	61.52103625463
NRP2	1.29553171062627	6.94147044375368	15.1863503438813	1.01557380763621e-31	3.39662646004471e-30	61.5076280102464
CXorf36	1.79653950387673	6.33533066081768	15.1834619454709	1.032938438485e-31	3.4488177948667e-30	61.4907511094663
SH2B3	1.38665829513178	10.2078185285049	15.1655189979129	1.14768074835098e-31	3.82540731070252e-30	61.3858933673462
FOLR3	-2.81275450216026	6.63961967737847	-15.1591106903466	1.19168806680286e-31	3.96534710038528e-30	61.3484363633153
SGK2	-1.58862561547512	9.12552354229201	-15.1586721006645	1.19476110323636e-31	3.96883438344567e-30	61.3458726385854
GABRA2	-2.81851479520542	5.89106764878812	-15.1534834017351	1.23172511918599e-31	4.08470061098582e-30	61.3155413695179
FAM151A	-5.19205989760682	9.06197957719328	-15.1466581710129	1.28209969267497e-31	4.23741515627937e-30	61.2756397751825
ABHD17C	-1.54982902551096	8.64098497816113	-15.1415506338383	1.32114342169521e-31	4.34447817479941e-30	61.2457773601094
COL4A1	1.63992284537395	12.21564510664	15.1361911251935	1.36339586984659e-31	4.47024858357212e-30	61.2144391756308
PSAT1	-3.83067218935319	10.3340488734678	-15.1327136021139	1.39153354853961e-31	4.55303272417827e-30	61.1941039595205
RNF150	-1.73248342705759	7.93932119905195	-15.1213035977768	1.48800969720674e-31	4.8605836759258e-30	61.1273749148336
PNP	-1.5125535736011	11.4328770059438	-15.1089199519011	1.60032383936815e-31	5.21439022120616e-30	61.0549383402519
CD84	1.72090820571966	7.47304219064817	15.1024697852976	1.6621514975862e-31	5.40240583767692e-30	61.0172033946791
CARD16	1.73333687805661	8.50694436807546	15.0955436927158	1.7312104591222e-31	5.61754864045296e-30	60.9766799787282
LAMC1	1.00380489055536	11.0360416055326	15.0793276441607	1.90436277425267e-31	6.16919107645918e-30	60.8817856154929
GPC5	-4.61491811481813	6.73843448982247	-15.0743694704529	1.96069499252442e-31	6.33075142643921e-30	60.8527662440703
SEL1L3	1.526110662319	9.89531697653064	15.066957090072	2.04804192981284e-31	6.58506104379294e-30	60.8093786777187
SLC25A10	-1.91886135534357	8.28275834808759	-15.0668330079725	2.04953683183514e-31	6.58506104379294e-30	60.8086523345054
KLK1	-2.39377210245799	8.18362584577788	-15.0661448973898	2.05784684918174e-31	6.60093950852912e-30	60.8046242952301
ITGB2	2.30090799712338	9.16387954938112	15.0527317391712	2.22675166323961e-31	7.11942999148992e-30	60.7260982901203
AIF1L	-2.27762169603229	10.6790916807221	-15.0437147819205	2.34804316873826e-31	7.49499968470703e-30	60.6733003353923
TMSB10	1.44982343725853	14.5759215962776	15.0326753640351	2.50559671876944e-31	7.98490895791256e-30	60.6086501405402
MT1F	-2.85623270551448	12.5615610437467	-15.0317391373377	2.5194363844244e-31	8.01597949648276e-30	60.6031668106031
TYROBP	2.21906334433283	10.8559564234749	15.0229915109376	2.65250849087574e-31	8.42569107174613e-30	60.551929581681
CTSV	-2.24172731699286	8.87976126288716	-15.0217499184648	2.67195873679322e-31	8.47374098420878e-30	60.5446566834283
HYAL1	-2.05067306568376	10.2693158720732	-15.0190779379851	2.71430318972521e-31	8.59412410588439e-30	60.5290045099626
ZFAS1	1.2554323472985	11.7244656248283	15.0149205182881	2.78153007980521e-31	8.79277548937135e-30	60.5046495291521
HAO2	-3.62777660406699	10.2691373023471	-15.0002293784396	3.03274775278913e-31	9.5714691154451e-30	60.4185736318509
CDCA7L	2.0056394553101	8.58402767373688	14.9993283461402	3.04887571790375e-31	9.60689954906681e-30	60.4132938283764
TRPV2	1.74887401286006	6.99111716429014	14.9940388335766	3.1453042230681e-31	9.87897715831917e-30	60.3822972753353
GNB5	-1.04417447432394	8.87596843025728	-14.9905492898502	3.21058716593967e-31	1.00678876584402e-29	60.3618471849773
COL4A4	-1.7339946088666	8.77428271350528	-14.9836080188415	3.34451225769254e-31	1.04711015556735e-29	60.3211654175208
CENPK	2.36933882002475	6.6582801805259	14.9745863732431	3.52698216643353e-31	1.10247724848374e-29	60.2682845127199
INPP5J	-2.63191827610995	6.63962868043005	-14.9708107163175	3.60627995815115e-31	1.12368014149133e-29	60.2461511444658
HSD11B2	-3.45673706487958	10.4738564932807	-14.9626088887093	3.78475136828013e-31	1.17369212131206e-29	60.1980666838597
MTURN	-1.91438899388568	8.3221147522881	-14.9477586873745	4.13072681370422e-31	1.27895915990188e-29	60.110990054441
ARL4D	-1.55757950987349	7.51194775136738	-14.9464917706507	4.16167186916801e-31	1.28650799627482e-29	60.1035603799348
PAPPA2	-1.51756447738221	7.4225136024383	-14.9380335900788	4.37430802923198e-31	1.35011122936878e-29	60.0539548306445
IFNGR1	1.09238909650579	11.0992902863052	14.9344381649321	4.46796360416645e-31	1.37684935028393e-29	60.0328664768824
TBXAS1	1.50144929840159	7.42592070801357	14.9304288168565	4.57477409947139e-31	1.40755098234756e-29	60.0093489939294
CHDH	-1.77935656396256	8.94063520630498	-14.9293337219903	4.60439036952237e-31	1.41444274063117e-29	60.0029252924018
NKG7	4.23580371638272	6.84370297059626	14.9281049178944	4.63785165270948e-31	1.42059344767411e-29	59.9957171429118
IQGAP2	-1.32861562530684	10.3647461727924	-14.9280662278779	4.63890916124001e-31	1.42059344767411e-29	59.9954901856136
PSMB8-AS1	1.22572116168623	8.71103414026762	14.9247483131175	4.73050234968353e-31	1.4463824579009e-29	59.9760266683772
FAR2	1.41589337658735	6.90682992022359	14.9141211240642	5.03625588496575e-31	1.53507899050457e-29	59.9136790906843
PIK3C2G	-3.25801762843788	6.43545880151342	-14.9047693203708	5.32166450807472e-31	1.61704345261638e-29	59.8588057968108
PHYH	-1.59371188488585	12.8464586449746	-14.8978071788353	5.54462338142619e-31	1.68218380267139e-29	59.8179493088049
IGSF11	-4.64985714486122	5.80604157514549	-14.8936289925668	5.68289953832517e-31	1.72147060358014e-29	59.7934281042008
RAP2B	1.28136653002223	9.22211515205441	14.8930968487937	5.70075713764373e-31	1.72421511019567e-29	59.7903049162551
BMP7	-1.40850145822973	6.50018975731365	-14.8924811961619	5.72148731700238e-31	1.7278186429265e-29	59.7866915784804
SLC22A12	-4.13204819518939	8.98314329024287	-14.8897163850849	5.81551943045618e-31	1.75351331257709e-29	59.7704641713035
UHRF1	2.20546256351133	7.11869205568804	14.8894389312838	5.82504084437162e-31	1.7536862597364e-29	59.7688356849814
KIAA0101	1.45828841985676	8.44356939897978	14.8681444095216	6.60443410163416e-31	1.98528073555104e-29	59.6438298082886
CDCA7	1.66273484139546	6.79708088897462	14.8662640612057	6.67808782808179e-31	2.00128200829625e-29	59.6327896590331
WNK4	-3.02891631155526	7.74424235914227	-14.8659176928056	6.69174470904858e-31	2.00231304660524e-29	59.6307559818787
RGN	-1.98941924292164	10.0973803892569	-14.8655105866858	6.70783220161376e-31	2.00406712377177e-29	59.6283656743375
MTCP1	1.75387141729855	7.53344152057306	14.8652090780823	6.71977181419347e-31	2.00457850511991e-29	59.6265953692354
TRIM59	1.54100767061755	7.60886913495621	14.8643755490368	6.75289018909462e-31	2.01139657775175e-29	59.6217012700006
HIBCH	-1.58520860971509	11.7901722768336	-14.8614043662076	6.87228022791672e-31	2.04385159615994e-29	59.6042553633476
CYP8B1	-2.8468172462294	9.35719388929479	-14.859110903257	6.96588289936978e-31	2.06855059007194e-29	59.5907883069243
SLC1A3	2.21260170732724	7.71175481584777	14.8492047618926	7.38508726831647e-31	2.18835337313308e-29	59.532614924277
GK	-2.0220349845097	9.39199309239029	-14.8435933089447	7.63367680758796e-31	2.25319927337224e-29	59.4996581677487
EMP3	1.4486397058004	9.71469087972406	14.8397172099708	7.81027140941992e-31	2.29820900619634e-29	59.4768917805441
OSBPL6	-1.9268403494748	6.78997670126216	-14.8394770898643	7.82134500297444e-31	2.29820900619634e-29	59.4754813852645
MTCL1	1.7809925852482	9.57979159727375	14.830503816065	8.24664612449331e-31	2.41955115859198e-29	59.4227714554689
SPARC	1.47453243903406	12.882363960999	14.8225100668843	8.64501143311019e-31	2.52920129302499e-29	59.3758095472646
MAL	-3.68736685889122	11.4081165892955	-14.8224871605674	8.64618024555714e-31	2.52920129302499e-29	59.3756749687223
C1orf116	-2.50538663414378	6.51580976423812	-14.8190519341162	8.82327077212596e-31	2.5694990172793e-29	59.3554919163308
TACO1	-1.10900562718828	8.82842740313658	-14.8171549849015	8.92261468877397e-31	2.5945745591288e-29	59.3443463019915
SUCNR1	-3.01728263127409	10.2009524427967	-14.8035465575667	9.6689461155614e-31	2.80743222102056e-29	59.264380349208
MTFP1	1.35290335829155	10.0554582522417	14.7916846479865	1.03703719080797e-30	2.99335668669298e-29	59.1946644411437
CLEC2D	1.53653352196707	6.61024323552099	14.7869471877774	1.06645648756025e-30	3.07189148166333e-29	59.1668176644832
TMEM45A	3.59241898612385	9.39641690567075	14.7868005987836	1.06738001888501e-30	3.07189148166333e-29	59.1659559844641
FRK	-1.12964604194898	9.50873923282859	-14.7810345129841	1.10435029866376e-30	3.17363071898988e-29	59.1320603109188
GAS1	-2.26191504304449	8.67792451785865	-14.7765329282332	1.13410309523275e-30	3.24960329875244e-29	59.105595992465
VTCN1	-3.60500325696641	6.65171486051213	-14.7737009108347	1.15323148151028e-30	3.29958887680584e-29	59.088945997223
HECW1	-1.3480371728858	6.9878867032698	-14.768987407356	1.18578785682539e-30	3.38779244984267e-29	59.0612328670653
GNB4	1.3853576924347	9.3353546158146	14.7618585622194	1.23678613573593e-30	3.52835101518027e-29	59.0193151278692
ETNK2	-2.42204262016334	8.49714292362771	-14.7608428145504	1.2442293906415e-30	3.54070544388323e-29	59.0133421642286
MSRA	-2.27434974441297	11.0122398006979	-14.760541391082	1.24644680679127e-30	3.54070544388323e-29	59.0115696684932
LHFPL2	1.82990480727451	8.89348962804347	14.7605292190027	1.24653643363408e-30	3.54070544388323e-29	59.0114980914283
GGACT	-2.90363145331717	8.95550548160218	-14.759154222271	1.25670266299709e-30	3.56441613488856e-29	59.0034124385258
CTHRC1	3.86861391375803	9.4541495772068	14.742706171043	1.38495435797816e-30	3.91684277951138e-29	58.906677523183
STRA6	-1.67738997054998	6.89219399450453	-14.7421360615133	1.38962764208785e-30	3.92439656444955e-29	58.9033241653282
DOCK10	1.92456300071215	7.76715515498001	14.7409029435994	1.39978986079773e-30	3.94740740744959e-29	58.8960709295686
DUSP1	1.24616022078052	12.9093754882768	14.740145362089	1.40607005592849e-30	3.95942054973312e-29	58.8916147496309
OAS2	1.42980152248937	7.30133553799764	14.7386435329029	1.41860353048218e-30	3.98898286856819e-29	58.8827806785803
ETS1	1.41429194486896	10.5542301001317	14.722250800387	1.56291134446526e-30	4.38846696850639e-29	58.7863429394305
CWH43	-3.62898460553317	6.62342091053331	-14.718013212514	1.60255175039622e-30	4.48691596514507e-29	58.7614097381092
CYP27B1	-3.71984676795694	8.66592235675674	-14.7154189334138	1.62731563680884e-30	4.54975166416781e-29	58.7461447291262
CDKN2A	1.37472225989095	6.98101512182083	14.705027178915	1.73041700380864e-30	4.82424507221132e-29	58.6849929379251
GSAP	1.00753473468124	10.9262470859677	14.7030913206547	1.75033500955414e-30	4.87284316083118e-29	58.673600105105
PMEPA1	1.67664942114975	9.9473827874726	14.7021613070082	1.75998546406983e-30	4.89275959011411e-29	58.6681267165145
GSTM3	-2.27402511815584	10.3336887804716	-14.6973467972217	1.81080344066014e-30	5.02690320587791e-29	58.6397908401592
HLA-E	1.36114801549911	13.0570987760422	14.6961676281904	1.82347240335823e-30	5.05491310232221e-29	58.6328505279701
EGF	-4.30698512621072	9.39929036379782	-14.6895021895109	1.8967746455461e-30	5.23589947578283e-29	58.5936171509099
ADORA3	2.16015081072263	7.20968206822987	14.6794280483863	2.01320836182155e-30	5.52617236461351e-29	58.5343128556638
CAPN3	-2.10094957502076	10.0761160143769	-14.6775883049475	2.03523263313217e-30	5.57881459814789e-29	58.5234817762959
C6orf223	1.4240308013166	7.70046775489525	14.6744674239288	2.0731476667468e-30	5.65900015606833e-29	58.505107645391
S100A2	-3.55464472725627	9.74233117398564	-14.674021066018	2.0786279586049e-30	5.66606806129311e-29	58.5024796554557
CHL1	-3.48810398178966	7.17122779287416	-14.66734963477	2.16229052030512e-30	5.88593498714722e-29	58.4631987815936
DLEU2	1.11107077981891	8.23167769730598	14.6561962317631	2.30976609874673e-30	6.26995924783062e-29	58.3975202113596
PLG	-4.90457074071128	8.91734258754865	-14.6515691167671	2.37386892496119e-30	6.43505630156491e-29	58.3702697128273
PELI2	-1.05768969803944	8.20929977661462	-14.6444442765947	2.47607920484052e-30	6.70285584746814e-29	58.3283059078223
DOC2A	3.66487255523511	6.66900249247031	14.6399446204648	2.54289054518293e-30	6.87422231655727e-29	58.301801738399
BTD	-1.10112364988063	8.1269229407596	-14.6348833748115	2.62020234765267e-30	7.06566253732801e-29	58.2719876764078
TUBB2B	-3.05136412655906	8.01727468603745	-14.6348372441713	2.62091773286263e-30	7.06566253732801e-29	58.2717159269922
MCTP1	1.46195161385599	7.4928282443814	14.6282780836853	2.72465488247279e-30	7.32517298238465e-29	58.233075021403
TRIB3	2.48535825182149	8.27570599069603	14.6264481595735	2.75432369340255e-30	7.39479315986253e-29	58.2222940628643
ISG20	2.69370261254267	7.36879574088656	14.6238824502575	2.79646800986414e-30	7.49767120729512e-29	58.2071777814347
AZGP1	-3.81784716883778	10.5081750458605	-14.623230585215	2.80727812441169e-30	7.51637212573015e-29	58.2033371300925
ARHGAP25	1.40743377045056	7.7424876479244	14.6227621195485	2.81507271848913e-30	7.52695910090975e-29	58.2005770077912
HPGD	-2.87873164389953	9.76889876369354	-14.6150898261709	2.94586014864466e-30	7.86592820889466e-29	58.1553705780481
AKR7A3	-1.99268745618581	10.8855789503005	-14.6130420000753	2.98178723691187e-30	7.95102694642662e-29	58.1433036354501
TBC1D24	-1.44297214766675	8.66224070210093	-14.6044802597084	3.1368134095727e-30	8.3530442954097e-29	58.0928493555876
EMR2	1.56326655334713	7.0554225089329	14.6012557769783	3.19727087567324e-30	8.49096367104606e-29	58.073845956938
GLS	-1.16412957804396	11.1570253406564	-14.5972138949553	3.27470652447758e-30	8.68484075415915e-29	58.0500240475597
ADI1	-1.29079707945961	12.5978789266379	-14.5966357192394	3.28593603162211e-30	8.70284598429212e-29	58.0466163065791
TNFAIP8	1.47950841891167	9.86620104019899	14.5920583759973	3.37621186604282e-30	8.91784048013115e-29	58.0196367012925
PTP4A3	1.43816421580538	8.23035526898873	14.5898987614642	3.41966351369804e-30	9.02045561305086e-29	58.0069069933697
SLC26A4	-2.87633672454542	7.54307554673486	-14.5857759693059	3.50417704447897e-30	9.21857260332126e-29	57.9826044150143
TCL6	-2.35393352532952	5.95525554171748	-14.5785109813829	3.65823008144862e-30	9.61094522336616e-29	57.9397762283737
MEF2C	1.39850191322223	9.86473527882735	14.5761919317288	3.70882056526091e-30	9.7216293050181e-29	57.9261041885293
PCBD1	-1.03859499310157	10.9302926210646	-14.576125481227	3.71028048377649e-30	9.7216293050181e-29	57.9257124208404
GPD1	-2.72864812905899	8.09845553609678	-14.5618265031828	4.03821311675552e-30	1.05386070406513e-28	57.8414026449733
MAPRE2	1.063697844398	9.39047767764945	14.548094044337	4.380474909881e-30	1.13878339322092e-28	57.7604177304996
RP11-728F11.4	-2.91821255881998	6.53764770165819	-14.5463486840031	4.426008802452e-30	1.14894498701002e-28	57.7501236735601
CCNE2	1.67571003088896	5.88225894480018	14.5445200040743	4.47422539001411e-30	1.1599251774985e-28	57.7393379400494
EBF2	2.04839634176659	6.30732806627234	14.5396156421854	4.60615352271011e-30	1.1925495758467e-28	57.7104102133674
TCF4	1.59673083792019	10.4511150476	14.5383515459436	4.64078538303608e-30	1.19993077469821e-28	57.70295379837
MCTP2	1.22729079680413	7.58876984459041	14.5260182110836	4.99267748342202e-30	1.28414023618882e-28	57.6301975390356
CLDN10	-2.21572961610411	11.6000440487816	-14.5245420382115	5.03654897624096e-30	1.29203302860401e-28	57.6214885542331
TYMS	1.47732377752815	9.71285303312938	14.5215938748363	5.12532750630387e-30	1.31137459263772e-28	57.604094740833
S1PR5	2.20302348436362	4.13907398906299	14.5196317586869	5.18528066641292e-30	1.32498456037845e-28	57.592518106033
TLR8	2.25226382640886	7.41228226899224	14.5164041693209	5.28543380767699e-30	1.34881793224819e-28	57.5734744177789
PNMA2	2.40944052685009	9.14592578090486	14.5151194100559	5.32583773358285e-30	1.35736142705449e-28	57.5658937454476
LGALS1	2.08556048897454	12.4141210539633	14.5114614057285	5.44258053168222e-30	1.38531345247324e-28	57.5443091155118
BRCA2	2.02796998409129	5.59224898492777	14.5048402416087	5.66045249616845e-30	1.43890023959021e-28	57.5052371991204
DNER	-3.28294006038229	8.22278452428733	-14.502016913561	5.7559937441064e-30	1.46129172785934e-28	57.4885755032392
LYPLAL1	-1.01055148231255	11.5505600729156	-14.4971079245332	5.92597809641218e-30	1.5005587172039e-28	57.4596039081193
FANCL	1.07632255449391	10.2402591008704	14.4918938780115	6.11203947739293e-30	1.54539992772488e-28	57.4288298585229
UBE2L6	1.13949310663667	10.8038767672694	14.4917064877356	6.11883434825503e-30	1.54539992772488e-28	57.4277238143521
PRKCA	-1.23602778674163	8.5972398823607	-14.4897595343354	6.18988145848969e-30	1.56133187522445e-28	57.4162320379753
PSMB10	1.74293262244045	9.5798300026373	14.4760419299035	6.71445089608243e-30	1.69147201943855e-28	57.3352562394894
PAK6	-1.98025808720928	6.59608638196583	-14.4722951447383	6.86532435192719e-30	1.72725920376664e-28	57.3131361831685
RAD51AP1	1.90616621001106	7.0346448111908	14.469823597937	6.96670247932975e-30	1.75051797297928e-28	57.2985442036133
EPN3	-2.61875488959595	6.25443957856263	-14.4641356077536	7.20574969111548e-30	1.80364608168802e-28	57.2649605669531
TMEM206	-1.12503342371926	8.95722026468126	-14.4520909946657	7.73943059191426e-30	1.93229426969335e-28	57.193837130128
KDELC1	1.32665839165146	8.56281083251903	14.4427067521742	8.182547460324e-30	2.03514908216866e-28	57.1384153375281
KCNMA1	1.8603882800903	7.90395333935725	14.4413896186571	8.24674397570343e-30	2.04644263204013e-28	57.1306360150026
P2RY8	1.87654448475024	8.89931020425693	14.4411555531188	8.25820493804641e-30	2.04644263204013e-28	57.1292535508215
HLA-DMA	1.64777339366484	11.2696608020771	14.4411336311979	8.25927915681282e-30	2.04644263204013e-28	57.1291240728907
QDPR	-1.59575168256674	11.1477885718922	-14.4238367344446	9.15204796929765e-30	2.26192923266412e-28	57.0269513981243
SGOL2	1.00137871652373	7.28406307681859	14.4227553679906	9.21097142169469e-30	2.27362504904023e-28	57.0205630022882
SPIRE1	1.13111293782915	9.63609586217089	14.4213009689162	9.29082137281081e-30	2.29045041617257e-28	57.0119706964992
AKR1A1	-1.40264441484825	13.1230562046962	-14.4199358611918	9.3664000927741e-30	2.30618185198844e-28	57.0039057577579
MS4A6A	2.09552900200337	9.72614062351778	14.4103889150372	9.91247107257432e-30	2.43451780139579e-28	56.947499199693
ANO10	-1.11760303353031	9.36180062097242	-14.4077796614598	1.00671922214482e-29	2.46942303314347e-28	56.9320816315019
IL4I1	2.89252831512986	6.51020055074941	14.4047751081291	1.0248354103977e-29	2.51071865104807e-28	56.9143276648586
FOLR1	-2.12009820567027	11.9355393253538	-14.401352866593	1.04586844486271e-29	2.55904814617532e-28	56.8941047237123
AGMAT	-2.83025990538722	11.0420031407334	-14.3925595914911	1.10191719666773e-29	2.68947386519189e-28	56.8421387799435
AIFM1	-1.58224742114854	11.3246911763076	-14.3881120529473	1.13140252398042e-29	2.75800473476272e-28	56.8158527370911
SLC25A5-AS1	-1.30024798766485	6.82829278974105	-14.3868103175588	1.14018114213186e-29	2.77595157821644e-28	56.8081588751431
EPHA3	1.95339626824025	6.44506675297929	14.3860120216317	1.14559840946239e-29	2.78568030112325e-28	56.8034405105078
ERICH4	-3.2403859015243	8.00222950386039	-14.3743837244815	1.22749707488809e-29	2.97375960083211e-28	56.7347054016885
AUH	-1.17724777516455	11.7468208824323	-14.3696794528988	1.2622737183842e-29	3.04671214367143e-28	56.7068954200417
ELF4	1.31977702995318	8.35332888601463	14.3677871740216	1.27653945094611e-29	3.07735506753909e-28	56.6957084641054
CD70	3.18402138761522	7.68525208347207	14.3595062267841	1.34089404615141e-29	3.2245622589597e-28	56.6467491589602
TGFBR3	-1.41976326432065	11.0356239299297	-14.3566581588851	1.36377089440044e-29	3.27555707835224e-28	56.6299093701797
PLEKHA6	-1.22866865984977	8.30609931965486	-14.3560730513477	1.36851893483048e-29	3.28293789519493e-28	56.6264497249337
CYSTM1	-1.23584407354212	13.2659861546102	-14.3521821183215	1.40051731715153e-29	3.35559155242699e-28	56.6034426130431
COQ9	-1.03162393079723	10.5182134901954	-14.3489356702828	1.42778865073808e-29	3.41675577116185e-28	56.5842454665125
FABP5	2.49810961711741	9.73912335626486	14.3435787922286	1.47395691476384e-29	3.52293677712883e-28	56.5525670175025
MIR34A	1.48523682119855	8.25317058301811	14.3312673962598	1.58581337635725e-29	3.78567068979607e-28	56.4797540916849
RPS6KA6	-2.04429171501171	6.47867744782871	-14.3268532430093	1.62795805221324e-29	3.87683473454766e-28	56.4536448113543
SDSL	-1.41266175176715	8.76969852135593	-14.3235679331674	1.6600519411231e-29	3.94846577597957e-28	56.4342115762573
MKI67	1.23772991688622	6.69865180072047	14.3167457890515	1.728736749968e-29	4.10684988637853e-28	56.3938546995903
SCRN2	-1.27748384283343	9.26750277091041	-14.2984656704898	1.92714930892755e-29	4.55487960513844e-28	56.2857001667611
TLR7	2.19850086543765	7.52349348091747	14.2983085132031	1.92895049352768e-29	4.55487960513844e-28	56.2847702355397
GLYAT	-2.92647306168086	10.9716896596047	-14.2968874879872	1.94531369442704e-29	4.58799074573713e-28	56.2763616603353
NCAPG	1.65122509681435	6.24301589104074	14.2940341277127	1.97859162780659e-29	4.66086746555065e-28	56.2594771318239
TMEM30B	-2.66288020353286	7.45793587122509	-14.2921172569043	2.0012673233497e-29	4.70862404205652e-28	56.2481338631574
LHPP	-1.59111846165138	8.86357846475431	-14.2892609993877	2.03553959218214e-29	4.78351804162803e-28	56.2312311749528
CCND2	1.45562733861894	8.36648831043351	14.2884001996295	2.04598322546237e-29	4.80230242345354e-28	56.2261370369127
IER5	1.1730894078969	10.5377552721149	14.2870226061498	2.06280869375018e-29	4.83306242194089e-28	56.2179844439028
CD93	1.42596351457017	10.8483964784978	14.2869238461141	2.06402022917727e-29	4.83306242194089e-28	56.2173999769621
SYPL2	-1.47077573656802	8.43416661960384	-14.2794820377144	2.15739397524085e-29	5.04567595712953e-28	56.1733568891989
GNLY	2.59127082872265	6.33765563002421	14.2781344918396	2.17474908474686e-29	5.08020349367744e-28	56.1653812265278
ACO1	-1.6265445167532	10.5607459948225	-14.2771905185793	2.18698982955135e-29	5.10271591302107e-28	56.1597940917628
TJP3	-1.58663156076351	6.64637220164448	-14.2707435958063	2.27245516540472e-29	5.29582030758229e-28	56.1216346495551
GRAMD4	1.43168737108945	8.65174090351757	14.2652665128004	2.34768826756219e-29	5.45816635301915e-28	56.0892132880267
TCF21	-2.96900041002938	7.96882996260258	-14.2636624836419	2.37019008831059e-29	5.50395207829376e-28	56.0797178854076
PEBP1	-1.15643684033181	13.8158335758615	-14.2612828187379	2.40397155673972e-29	5.56920077311368e-28	56.0656305867721
DPP6	-1.7260352276739	6.55437414621267	-14.2575883658495	2.45737617174319e-29	5.68620018772076e-28	56.0437590908727
ELMO1	1.36328472745076	7.89023514269568	14.2543892600092	2.50457994114504e-29	5.78177411855142e-28	56.0248192815774
RDH11	-1.34520286539479	10.791768345355	-14.2511623684855	2.55311430940671e-29	5.87996326087686e-28	56.0057142079895
OSMR	1.63043260345123	10.0267000456493	14.2470384579496	2.61651480331691e-29	6.01890535565824e-28	55.9812971455098
RCN1	1.54484573978087	11.271425650885	14.2432504615644	2.67614031177493e-29	6.14884806218956e-28	55.9588678798793
PDLIM1	1.45324539703179	12.2496539492901	14.240001179777	2.72836990448537e-29	6.2615130864179e-28	55.9396275809879
ACAT1	-1.70390478426245	11.8678299348231	-14.2345418424053	2.81843462372623e-29	6.45683908183847e-28	55.9072989154849
HCLS1	1.91548519207703	10.4042049933097	14.2344443655716	2.82006952092134e-29	6.45683908183847e-28	55.9067216651693
AHNAK	1.24410946872761	9.9724901014597	14.2216831404438	3.04251994742974e-29	6.94992406173373e-28	55.8311446744349
KNTC1	1.10826798096464	8.02415032967682	14.2128976379626	3.20580616547571e-29	7.3143882464678e-28	55.7791065737251
VCAN	3.13629483832675	10.4642105710566	14.2067574108622	3.32511395699399e-29	7.57778005152618e-28	55.7427335797876
CLIC2	1.33447947138878	8.87289639440492	14.2062063281926	3.33603695728387e-29	7.59384301112736e-28	55.7394689858097
PP7080	-2.34015639555919	10.0759935660136	-14.1941583719987	3.58403489434274e-29	8.14889789956187e-28	55.6680918266548
CPN2	-3.99068021642977	7.09752061626883	-14.1939183554632	3.58915874759412e-29	8.15109180696374e-28	55.66666976107
C1QA	2.54834569274428	10.7577470174233	14.1921141917228	3.6279095859556e-29	8.22956018230832e-28	55.6559802011478
ALDH7A1	-1.14955933451383	11.0217816682833	-14.1905643586835	3.66153236418941e-29	8.2962280700287e-28	55.6467973474004
NCKAP1L	2.02223414063204	7.74971904251212	14.1864714804014	3.75183394819836e-29	8.47145086990089e-28	55.6225459647797
RASSF8	-1.13335706299726	8.26562658434112	-14.1821722223487	3.84909329518101e-29	8.68105632822239e-28	55.5970704272976
KCNE1	-2.69782315347414	5.55992898098982	-14.1797925537343	3.90400912062839e-29	8.79479020174665e-28	55.5829689716412
GBP2	1.76674482251931	9.61025815202737	14.179257053093	3.91647473807441e-29	8.81274263966939e-28	55.5797956423268
FAM167A	-1.58597827728604	7.11311381190054	-14.1780993508762	3.94356072750867e-29	8.8635145296379e-28	55.5729351311706
AHCY	-1.26500673397904	11.4736003488789	-14.1737305365823	4.0474766332614e-29	9.0866545859439e-28	55.5470447915641
JMY	-1.17490415964867	9.71793449158273	-14.1723053106892	4.08196694301874e-29	9.15360069979684e-28	55.5385983630299
APOH	-3.55863018844227	7.9296742013963	-14.1684749305042	4.17612816387545e-29	9.35404981529086e-28	55.5158973570197
FUT6	-1.95680732464268	9.10207354588938	-14.1645878847375	4.27390780843876e-29	9.56213688785289e-28	55.4928594437412
L1CAM	-2.4607644070099	6.84581535949523	-14.1521890004116	4.60140049232137e-29	1.0259709698408e-27	55.4193659728217
CDH13	3.22156747035155	7.50898457131301	14.1406346634458	4.92918569612686e-29	1.0978080733908e-27	55.3508686286295
APBB1IP	2.00655993584251	9.28702340807665	14.1381940790547	5.0013616036484e-29	1.11261845709313e-27	55.3363989471297
G6PC	-4.08310474031705	8.34667338869474	-14.1361953241933	5.06125929354882e-29	1.12466690356308e-27	55.3245484597263
CRYL1	-1.55461917642331	12.0247821432393	-14.1323956783151	5.17711444601753e-29	1.14780843922509e-27	55.3020198257872
FUT3	-2.24369907293473	7.73008391482492	-14.1320392095348	5.18811896647184e-29	1.14894851552409e-27	55.2999062198542
FANCI	1.19018962926814	6.92456213503903	14.1311591503618	5.21538767507107e-29	1.15238312337901e-27	55.2946880573505
MICB	1.56109281749709	7.9532019912674	14.12684937105	5.35101458600815e-29	1.18101953683754e-27	55.2691331560774
FLJ32255	1.70244880227947	6.89366598798424	14.118398437805	5.62730758779435e-29	1.23920900464249e-27	55.2190194104124
FNDC3B	1.3197566936631	6.91598524927674	14.117611561291	5.65374997812073e-29	1.24363463323444e-27	55.2143530031269
PRR15L	-2.62829709658464	8.16247408507662	-14.1173751989416	5.66171704550622e-29	1.24399094590669e-27	55.2129512969182
P4HB	1.13958229922436	12.4790412433068	14.1141159928899	5.77272911832939e-29	1.26696212754914e-27	55.1936227354311
OR7E14P	-1.72815366613108	8.39841394167023	-14.1128868019515	5.81516081381173e-29	1.27484716767222e-27	55.1863328846982
SIM2	-2.7095423794873	6.5658072858519	-14.1077666764169	5.99529609910318e-29	1.31286936588071e-27	55.1559662793926
MAGI3	-1.17645665189412	7.63302361869324	-14.0928278551974	6.55346796317465e-29	1.42871433381824e-27	55.0673561255216
SAMHD1	2.0007807913227	9.97645471852629	14.0825447947092	6.96766034229551e-29	1.51564012262652e-27	55.0063527160814
BIRC3	2.53124833304903	9.8461427047351	14.0659603672205	7.69165029012315e-29	1.66942031047756e-27	54.9079514620285
FOXI1	-2.94880836436051	7.22715893219895	-14.0657435153685	7.70159995816391e-29	1.66973072544308e-27	54.9066646771765
PCDHB14	1.53272060540166	8.04022317621954	14.064416167191	7.76278346282272e-29	1.681135835225e-27	54.8987882080663
HLA-DRA	1.66352216329238	13.6191432749996	14.056418026173	8.14190191308167e-29	1.76129288735638e-27	54.8513247505822
LILRB1	2.48150381144213	6.95700480273019	14.0546485658579	8.22825097010557e-29	1.77800982098235e-27	54.8408236256656
DGCR5	2.05039062097202	7.51492386613934	14.05214577556	8.3519554206718e-29	1.80275302081219e-27	54.825970076396
MIS18BP1	1.04299137841944	7.22516496714011	14.0480935412395	8.55620706862405e-29	1.84480860657825e-27	54.8019199782413
TIMP1	2.17501334669852	12.6130965290048	14.0465568765463	8.63496450024865e-29	1.85974361802608e-27	54.7927995445405
TGFB1	1.61230507599988	8.72321602640002	14.0431955229877	8.80978277169282e-29	1.89531210255113e-27	54.7728486260144
SOBP	-1.31764190973796	7.27987759223637	-14.0420936870752	8.86785566471914e-29	1.90571385057928e-27	54.7663086396502
TMEM61	-3.08855673896373	7.02840536186548	-14.0360577025436	9.19285927763774e-29	1.97339374570013e-27	54.7304803597508
COBLL1	-1.55413345265579	9.74044991716989	-14.0331031155761	9.35627128656749e-29	2.00627528386692e-27	54.7129416693143
CDKN2B	2.15267894386847	6.03413644744884	14.0324611335527	9.39216110803261e-29	2.00957385978527e-27	54.7091307280066
SEC24D	1.27026547110409	7.75306550460503	14.0126195434349	1.05720989028047e-28	2.25710856640598e-27	54.5913329697629
SLC6A19	-3.74224599871574	9.19541971667071	-14.0102168945744	1.07247111790793e-28	2.28719928616729e-27	54.5770668372062
GUCY1B3	1.16899827923486	10.3595714144222	14.0086896513003	1.08228646299709e-28	2.30513124584957e-27	54.5679983690905
HIBADH	-1.16624145713342	10.8020940901944	-14.0085433026122	1.08323173500049e-28	2.30513124584957e-27	54.5671293712506
ESRRB	-2.11903082020735	6.29515836530563	-13.9989195258221	1.14724267869705e-28	2.43869948587674e-27	54.5099815575586
FILIP1	1.40137390586296	7.37843176979021	13.995672200943	1.16968603727773e-28	2.48102561088813e-27	54.4906969116967
POU5F1P4	1.71087706094154	7.58290611895192	13.9929942766061	1.18852467687914e-28	2.51825893428695e-27	54.4747931864569
HEY1	1.97247387969058	9.39541774179702	13.9920230207838	1.19543212773632e-28	2.53015920858576e-27	54.4690249480493
DEGS1	1.28431374381192	11.940535830739	13.98846806267	1.22105936560097e-28	2.57605409111017e-27	54.4479116920483
ADHFE1	-1.08443854723948	9.30302485200992	-13.9876951281243	1.22670380073101e-28	2.58517933231474e-27	54.4433210428509
GRHPR	-1.17397968738256	11.6768958502673	-13.9862985168937	1.23696907651125e-28	2.60401255967175e-27	54.4350261217429
FMO4	-1.69823257056128	9.97652467358707	-13.980796407594	1.27825467755484e-28	2.68515685159672e-27	54.4023460567458
KLHL3	-1.62950946593763	8.05419660017339	-13.9790158400813	1.29190883958941e-28	2.71093376307417e-27	54.391769847453
AGXT	-2.7797903759291	6.99050900112466	-13.9774784932994	1.30381537885589e-28	2.73204054048153e-27	54.382638148674
RP11-44F14.8	-2.80180684416633	5.33659947319953	-13.9773577301653	1.30475531705225e-28	2.73204054048153e-27	54.381920820023
LAT2	1.61846338541318	7.58691774418908	13.9763377139157	1.3127215641565e-28	2.74578761322339e-27	54.3758619213469
DTX3L	1.19923595169944	10.8280213385446	13.968348186109	1.3768286555961e-28	2.87680861631429e-27	54.3284016976277
IGSF6	2.39350676946377	6.96997453220571	13.9577130497124	1.46705703988023e-28	3.05556332886425e-27	54.265219134398
GRIK3	2.51837532437578	5.53514861651092	13.953000677546	1.50890849600332e-28	3.13939465107953e-27	54.2372208675885
DDX26B	1.0239191413844	8.56923552375883	13.9468427064147	1.56540683818759e-28	3.25004328619053e-27	54.2006314392901
ERV3-2	1.99612971373469	9.73347312777863	13.9460457213044	1.57287229927596e-28	3.25863892108981e-27	54.1958957297811
PIK3CG	1.78938294684706	7.10883564190647	13.938805192618	1.64235060151414e-28	3.3989893811062e-27	54.1528703623374
COLEC11	-2.07801426687879	9.56351963988085	-13.9370883210469	1.65927131979113e-28	3.43038592790995e-27	54.1426676937121
PTTG1	1.50443097144934	8.63717283739115	13.935847822494	1.67160570705603e-28	3.45224449447746e-27	54.1352957947092
RCSD1	1.35494068164556	8.47224198408576	13.9278186061257	1.75369298676763e-28	3.61796093133249e-27	54.0875781902798
KIAA1522	-1.22419801450149	9.435208091032	-13.9269174374782	1.76315465791095e-28	3.63365595587768e-27	54.0822222829409
ETNPPL	-3.42684004137456	6.90326048834958	-13.9212968791438	1.82333201635929e-28	3.753727330738e-27	54.0488164642821
DOCK8	1.07614197483305	9.33785714077595	13.9199747363674	1.83778414276383e-28	3.77951011689698e-27	54.0409579998897
PTPRD	-2.64378651096936	8.94085440787995	-13.9159561015731	1.88241955786891e-28	3.86724747533258e-27	54.0170716009555
MUT	-1.00488279372025	11.4068869019663	-13.91427624972	1.90139826364703e-28	3.9021470753108e-27	54.0070864007443
CLCN5	-1.82528976885702	9.92952147464333	-13.9064189682685	1.9927458055144e-28	4.07767339631812e-27	53.9603795146149
TNFAIP3	1.62305257498858	10.197768465482	13.906383447969	1.99316858700585e-28	4.07767339631812e-27	53.9601683582984
DGKD	1.22595050873121	8.9364466455938	13.90183826606	2.04801595236644e-28	4.18551247658288e-27	53.9331480903649
CLEC4A	1.9067934813059	7.84318526766825	13.8878464909102	2.22653216830644e-28	4.53615425848627e-27	53.8499611219793
PTPRC	2.16666161810461	9.3407474954551	13.8861620716703	2.24904867833738e-28	4.57726947525797e-27	53.8399456858558
HRH1	1.55532860528411	7.03722357677891	13.8816836646532	2.31002969920922e-28	4.69650125257278e-27	53.8133165044659
SLC2A1	1.40124261076761	9.07005018974065	13.8805918349977	2.32514625796469e-28	4.72233590775647e-27	53.806824148735
MAD2L1	1.14651085177626	7.42258789225312	13.8749249482807	2.40521198970786e-28	4.87989128222405e-27	53.7731258554754
MFSD3	-1.98619597229213	7.5629778647056	-13.8694538023517	2.4851319626736e-28	5.03162203888841e-27	53.7405895738106
NUDT6	-1.14462126262647	9.35809472859594	-13.8543874108455	2.71923629661134e-28	5.48295392770428e-27	53.6509815099253
FAM26F	2.95665474826717	8.30206983197447	13.8477570813306	2.82914229768177e-28	5.69376380783504e-27	53.6115427077504
IL3RA	2.39703781865212	5.38340970532559	13.8477302264072	2.8295963818722e-28	5.69376380783504e-27	53.6113829624649
CD86	1.93246905377681	7.77036093511219	13.8411531109111	2.94303524853552e-28	5.90989219631636e-27	53.5722579061054
MECOM	-1.70995311636348	9.4385967325142	-13.8328616644055	3.09255721351988e-28	6.20379005402007e-27	53.5229309451964
ATM	1.01361969921817	9.31029833967887	13.8316060516397	3.11585423324558e-28	6.24413365208386e-27	53.5154607506562
MYO3A	2.04951890909161	5.74082834998427	13.8305327043702	3.1359087848561e-28	6.27790360310466e-27	53.5090748547248
CNP	-1.01627308382701	9.61420297351771	-13.8200927786659	3.33784367540042e-28	6.67534675450743e-27	53.446958552399
LYN	1.18172053573577	9.63851321183046	13.8182616739738	3.3745817102717e-28	6.74193954532263e-27	53.4360629896387
SLC25A48	-1.52408812720102	7.70519360563208	-13.8150084096031	3.44085505571772e-28	6.86734401598896e-27	53.4167046747349
BIN2	2.84884186642192	6.90990618779118	13.8140881168267	3.45983814756174e-28	6.89820629237665e-27	53.4112284179485
PRRG2	-2.32340850028682	6.53398206965815	-13.8089372443103	3.5680398805865e-28	7.10670870118036e-27	53.3805768612413
FAM129A	1.55596242571131	9.65939208104253	13.8083915377015	3.57970003781644e-28	7.12269452194563e-27	53.377329399681
RDH10	-1.28542293071311	9.61107069247432	-13.799647587339	3.7718254277757e-28	7.49736374837485e-27	53.325292218671
LILRB2	2.19938746732467	7.64403461438293	13.7959474637072	3.8562052202784e-28	7.64957146884983e-27	53.3032705230014
ACOT12	-3.04308490515659	5.7654373113303	-13.7932231648403	3.91953813897464e-28	7.75166780885609e-27	53.2870560094611
INHBB	3.62521804572674	8.42140900710831	13.7906856873539	3.97946489973828e-28	7.86225126713413e-27	53.2719530047681
PLA2G7	3.06102103629292	7.27868514604251	13.7850059728289	4.1169485800116e-28	8.11751259755003e-27	53.2381460263746
FAM124A	-1.22747861311144	7.00120913105073	-13.7786243245251	4.27710844464747e-28	8.42482898559255e-27	53.2001585809424
MCM5	1.07314447708176	8.56116193665633	13.7680653434189	4.55593144968e-28	8.96503016890344e-27	53.1372995675963
RASSF8-AS1	-1.55510766468653	9.05457436429919	-13.7650555318124	4.63869393980146e-28	9.11873244996679e-27	53.1193804975314
TYRO3	-1.57534602379807	7.20941802018928	-13.7647330338282	4.64765070617597e-28	9.12718498901231e-27	53.1174604558305
CD300LF	3.10064029780606	6.98889172241332	13.7533582573061	4.9748947277509e-28	9.75029617691899e-27	53.0497348642503
DARS	1.09917103338473	11.9337216874824	13.749277253821	5.09784650459175e-28	9.97132671092752e-27	53.02543456954
PRADC1	-1.0361451919959	8.77955101786406	-13.7482259775119	5.13000927794233e-28	1.00142481910749e-26	53.0191745897978
PLCD1	-1.01077157636257	8.84603108678104	-13.7465372845377	5.18209925582051e-28	1.01058669965001e-26	53.0091188768618
C1QB	2.48942691311388	10.6526733729443	13.7314901089271	5.67028454737789e-28	1.10249907583392e-26	52.9195092961937
TREH	-3.88144518771864	6.00196630655128	-13.7312534611409	5.67831938760873e-28	1.10296711276257e-26	52.9180998910053
HIGD1B	3.46764192671931	6.33222396782198	13.7295177508719	5.73760115778026e-28	1.11337866427065e-26	52.9077624028559
ADCY3	1.14762753655455	8.51269746069876	13.7253087213998	5.88394459372173e-28	1.13727248611787e-26	52.8826936387321
HSPA6	1.94735686742862	8.23711103857813	13.7131492583498	6.32806128592318e-28	1.22070544431898e-26	52.810266470152
PLIN5	-1.2617195924103	6.9147145986728	-13.70906045849	6.48482478965743e-28	1.24971564456732e-26	52.7859097536925
RP11-369C8.1	-3.4816366733259	6.07785672826266	-13.7041664576433	6.67758273332558e-28	1.28559866395332e-26	52.7567551834317
MIR4435-1HG	1.88981305698721	7.1434037086863	13.7025013717449	6.74446492158967e-28	1.29720086357444e-26	52.7468355957499
ARHGEF6	1.20680901666012	9.82603903890645	13.6912895183516	7.21262763645023e-28	1.38588518673322e-26	52.6800377385094
IFNAR2	1.10759650233247	9.13388503616398	13.6882889861845	7.34334914565391e-28	1.40911474149234e-26	52.6621599253335
TRIM63	-2.89255813889364	6.63171314709711	-13.6867007598403	7.41349985213139e-28	1.42030482504324e-26	52.6526967152038
IDO1	3.12303637220507	8.33338239038858	13.684587478567	7.50788379675579e-28	1.43698256379509e-26	52.6401048102925
SLC25A33	-1.37066819547197	9.67259133476952	-13.6813279268009	7.65582838160284e-28	1.46386907757106e-26	52.6206823753658
BSPRY	-1.75091566223966	7.94657491556674	-13.6796771955771	7.73186216493692e-28	1.47696653577582e-26	52.6108460518387
NHSL1	-1.29352170818311	8.18346767619452	-13.6768199939046	7.86525885598668e-28	1.50098547535037e-26	52.5938202687364
GAS2L3	2.12653668921128	9.69130928588309	13.6763174181773	7.88896035480065e-28	1.50404410499745e-26	52.5908254193876
XAF1	1.30703416735365	9.78227189652849	13.6740313701359	7.99767660259688e-28	1.52328924911853e-26	52.5772026673129
KLHL13	-1.61880439320815	9.70106770460298	-13.6733772880368	8.02905762956648e-28	1.52778155807644e-26	52.5733048801881
FLI1	1.44747262337225	8.34179470721825	13.6664364515156	8.36975508899688e-28	1.59106527632638e-26	52.5319416873059
EAF2	-1.7094076899294	8.29053126806608	-13.6602820590576	8.68394385202345e-28	1.64600208467899e-26	52.4952628449304
ANGPTL3	-3.37711392364977	7.85552079025442	-13.6597622923993	8.71101346950169e-28	1.64953771003636e-26	52.4921650462591
ENOX1	-1.46289417862957	7.7112312259252	-13.655653268106	8.92800969163996e-28	1.68899673693486e-26	52.4676747855312
CD1D	2.4211227534912	7.35107180286504	13.6489828650912	9.29186112325509e-28	1.75275443844732e-26	52.4279162981823
MELK	2.20455048246808	7.23375587659188	13.6458072779166	9.47026280469565e-28	1.78468923758875e-26	52.408987508215
ZAK	1.09397900177854	9.23202652829618	13.6446605300797	9.53552588203964e-28	1.79526197658112e-26	52.4021519189247
MRO	-2.40228612213889	8.24933382843974	-13.6436105985404	9.59567399145812e-28	1.8048523470114e-26	52.3958933693923
RIMBP2	-2.03731534629393	5.33945111966857	-13.6409317987759	9.75086356396471e-28	1.83194677536638e-26	52.3799249877675
TLR4	1.06239009914284	7.84717332417136	13.6408024826708	9.75841845748507e-28	1.83194677536638e-26	52.3791541211444
SLC12A6	-1.31374059917888	9.84659260473847	-13.6351105204024	1.00968278168489e-27	1.89366247255906e-26	52.345222781253
RASSF10	-2.28589648630841	7.26370126023107	-13.6334298635513	1.01989793450614e-27	1.90916710777324e-26	52.3352035662622
SLC15A3	1.63435992539359	8.63080266819014	13.6327495533799	1.02406228317671e-27	1.91513327175384e-26	52.3311478588682
CENPF	1.39652635906401	6.29674932268689	13.6211691598086	1.09761933002726e-27	2.04762426314669e-26	52.2621065679979
FDXR	1.13292262744828	7.98644031079883	13.6211048433048	1.09804229836582e-27	2.04762426314669e-26	52.2617230969391
KIF13B	-1.10635376692548	9.67272806291917	-13.620480736946	1.10215513316178e-27	2.05334015730397e-26	52.2580020065274
GABRD	2.66705517714935	4.86216815455986	13.6147317926047	1.14077367971787e-27	2.12125458717177e-26	52.2237241914326
SFMBT2	1.30163802440811	7.32034284809988	13.6141141388901	1.14500257806977e-27	2.12710005000848e-26	52.220041346191
SLC23A1	-2.6055513966706	9.1325307031037	-13.6105308583131	1.16984792637783e-27	2.17119787017794e-26	52.1986751090264
FABP6	3.73055291407357	5.78998003741831	13.6103402488899	1.17118457691619e-27	2.17162218760458e-26	52.1975385303293
CEACAM1	-1.48377509099132	8.58342083554188	-13.6067510446058	1.19664147404249e-27	2.21294099964888e-26	52.1761361912443
CBR1	-1.14197336937601	10.5831634286873	-13.6067211681238	1.19685568632472e-27	2.21294099964888e-26	52.1759580353903
SLC39A4	-1.88182551656289	9.43663590910683	-13.6049906010802	1.20932950301434e-27	2.23389716584147e-26	52.1656384380638
TPM1	1.08303921684944	12.2864538540722	13.6020419604786	1.2308838134921e-27	2.27157173828924e-26	52.1480549130214
NEK6	1.18899084887007	8.79462753785479	13.5961000319318	1.27549492743905e-27	2.35168627308354e-26	52.1126201054171
OLFML2A	2.3248769420017	9.32702533438548	13.5925558120966	1.30287181596502e-27	2.3999045790506e-26	52.0914831194286
FERMT1	-1.76490010144922	7.57389832373556	-13.587581199877	1.34229330994859e-27	2.47019780109693e-26	52.0618143633832
POMGNT2	-1.01716932882824	8.85434512026455	-13.5840716819879	1.37082127845141e-27	2.52033079140424e-26	52.0408826318309
ENPP3	2.84838875012889	10.7148329511516	13.5817079831425	1.39037665328954e-27	2.55149738088218e-26	52.0267844861352
DHRS4-AS1	-1.38610847581929	9.09832061904369	-13.5799556935807	1.40505384725798e-27	2.57601967749384e-26	52.016332851167
CAMK1D	1.54780413519138	7.40236220293965	13.5736562530764	1.45911160161954e-27	2.67262881122816e-26	51.9787580273714
ERVMER34-1	-2.65122471147175	6.26215017844413	-13.5698476952871	1.49279964960254e-27	2.72668968616592e-26	51.9560397006672
ZNF532	1.11762591432053	9.41133282703293	13.5668841931638	1.51955092400002e-27	2.77296820851735e-26	51.9383616265641
ACADM	-1.49349267765011	13.2715062912036	-13.5662969678024	1.52490848544258e-27	2.78015640987806e-26	51.9348586131622
CD97	1.92799889836688	9.11006614224664	13.5599022064999	1.58449046440931e-27	2.88341955542786e-26	51.8967102736036
RGS5	2.40452687570893	11.9737320120947	13.5520463629053	1.66088724204755e-27	3.01964091436827e-26	51.8498426150434
HK1	1.22106232370047	10.3350236569813	13.5508477478944	1.67286366560938e-27	3.03859638389974e-26	51.8426914203816
NLRC5	1.71123120234463	9.20081066621746	13.5398597498085	1.7867660426699e-27	3.23649054254043e-26	51.7771309254903
DIAPH2	1.3558910446157	8.97118390041229	13.5327401917848	1.86468292979979e-27	3.37450791700334e-26	51.7346481041163
BIK	-2.74696099640086	6.19236984261098	-13.5272883643094	1.92664125455955e-27	3.48341715388493e-26	51.7021148296084
LLGL2	-1.01730553467436	8.98042745835768	-13.5265908799563	1.93471531076936e-27	3.49479127887269e-26	51.6979525378625
PHYHIP	-2.47701981391214	5.22890635447708	-13.5264273980403	1.93661266951879e-27	3.4949973950183e-26	51.696976943015
EOGT	1.10953756986417	8.97788820063753	13.5248972634004	1.95446189828892e-27	3.5239649259029e-26	51.6878456384339
TMEM140	1.33609567979948	10.8274266205887	13.5236630286394	1.96897940244171e-27	3.54687750996829e-26	51.6804800659492
SORT1	-1.0168296485437	9.90197284449577	-13.5188417410144	2.02673157896182e-27	3.64755851387261e-26	51.6517071470956
STC2	2.4684055771471	8.42338152217303	13.5174137451332	2.04416040930459e-27	3.67555044605144e-26	51.6431847777335
ST3GAL6	-1.09312334312514	7.97813994906487	-13.5165556844178	2.0547052447947e-27	3.69112448146025e-26	51.6380637634087
ACOT13	-1.37210483030645	10.8093398626095	-13.5072285563804	2.17290306229421e-27	3.89275384989984e-26	51.58239568293
SEMA3F	1.32779686833761	9.68467082334461	13.5065347469026	2.18196278477067e-27	3.90541448572788e-26	51.578254556343
CD36	2.51132045726542	8.63433556321602	13.5041726015212	2.21309216196154e-27	3.95751763524491e-26	51.5641554697341
PRF1	1.46370092515574	8.68622732032145	13.5001104356651	2.26766893435597e-27	4.05141690468939e-26	51.5399086510027
ENTPD5	-1.89397345233916	10.0757301120467	-13.4988284563411	2.28517111107199e-27	4.07896799689434e-26	51.5322564083224
CSF2RA	1.6051407586085	7.03366683651231	13.4971966109913	2.30764568061486e-27	4.11533645990634e-26	51.5225156563703
ALAS1	-1.01036977440668	10.1978968942049	-13.4951506494736	2.33613670667987e-27	4.15522878670704e-26	51.5103027725402
MS4A7	2.20643705562672	10.1371820834219	13.495133615358	2.33637538800508e-27	4.15522878670704e-26	51.510201090457
PCSK6	2.19807034744028	6.65078861905542	13.4837514261754	2.5014494637286e-27	4.43673375924135e-26	51.4422536441366
SLC16A1-AS1	1.28849753109778	6.55725851930344	13.4816313952926	2.53346252018999e-27	4.48945135019925e-26	51.4295970717804
SLC34A3	-1.67652514773309	8.63105967936877	-13.479536370377	2.5655010684215e-27	4.54211882926766e-26	51.4170895466063
IPO13	-1.23726961594735	9.21983482373232	-13.4785374060795	2.58092047686052e-27	4.5652942622734e-26	51.411125538453
KAL1	1.54017306602639	7.13950031230319	13.4759842290776	2.62075286678308e-27	4.63145466955592e-26	51.3958823385571
BTN3A3	1.50286907473126	9.42789627235785	13.4758382078526	2.62304948375278e-27	4.63145466955592e-26	51.3950105393022
CPNE2	1.056178783537	9.69007596496287	13.4686958866728	2.73787910482755e-27	4.8211763320319e-26	51.3523669131506
GRB14	-2.10475922970717	9.92785747269764	-13.4669676419123	2.76641303721184e-27	4.86704929230833e-26	51.3420479203367
SLC25A35	-1.20009509153447	7.59297647222876	-13.4629645507852	2.83365465711521e-27	4.98087871074448e-26	51.3181456752228
YBX3	1.11538157358864	11.9690384109127	13.4524792692163	3.0176421474502e-27	5.29005084506945e-26	51.2555345598255
ANK2	-2.60931303271798	10.204004271606	-13.4461312569317	3.1347984061012e-27	5.49051956757618e-26	51.2176256186831
SLC22A6	-4.70630642978624	8.79175272294906	-13.4445679908161	3.1643417417799e-27	5.53731551760217e-26	51.2082898075432
C21orf33	-1.13603681256417	11.5617545548743	-13.4432260657497	3.18992439654844e-27	5.57710332274335e-26	51.2002757400046
SLFN5	1.05657694554956	8.61913613463046	13.4378020865054	3.29545607239965e-27	5.75134849180417e-26	51.1678823984807
RUNX3	1.70100918565014	7.31305387073025	13.4332003272448	3.38772749159786e-27	5.90712376404149e-26	51.1403983411348
LDLRAD3	1.34284294796178	8.57404945947019	13.4307515979628	3.43787802605425e-27	5.98924190512331e-26	51.125772824676
LGALS3	1.11048458473764	12.2852382446962	13.4238519370733	3.58321982961778e-27	6.21482526023707e-26	51.0845615529247
BTG1	1.09041859529129	12.6786205594757	13.4210058889864	3.64495021578917e-27	6.31072255117067e-26	51.0675615477257
GCH1	-1.57882262122564	10.8248403317947	-13.4198837862827	3.66958020115914e-27	6.34775837268473e-26	51.0608588911658
RIMKLA	1.63250511718892	6.865116734629	13.4174264464453	3.72410221467172e-27	6.43639147313501e-26	51.0461802325319
MYC	1.91959708921635	10.9289922411391	13.4156338401341	3.76438662181698e-27	6.49456103881963e-26	51.0354720904365
LINGO2	-1.6483805836455	6.44248692204127	-13.4138360503443	3.80522583963952e-27	6.55924549086148e-26	51.0247328167243
HLX	2.00832350332172	8.16602178524295	13.4090385523652	3.91639263207749e-27	6.73310343825322e-26	50.9960736691483
QRFPR	3.8672258687437	4.82451165061296	13.4077061473047	3.94783999245038e-27	6.78121963295662e-26	50.9881139762642
HDHD3	-1.35462299457502	9.62415345312411	-13.4053006211144	4.00525692396423e-27	6.87382053001532e-26	50.9737433011529
TGFBI	3.01103125283675	12.0699868245465	13.403860951453	4.04001932339138e-27	6.92741371121151e-26	50.9651425343472
GGTA1P	1.83697614384186	10.0446253200611	13.4035522343041	4.04751289194259e-27	6.93419625604744e-26	50.9632982054821
TSPAN8	-4.11269020227532	9.09668171909467	-13.4026857454083	4.06861984167308e-27	6.96426901982103e-26	50.9581216267973
LDLRAD4	1.14952689922062	8.11028011698956	13.3985235952827	4.17155305745431e-27	7.13422935192382e-26	50.9332555652781
MIOX	-3.88860419563233	11.9219807702433	-13.3981936960305	4.17982241881872e-27	7.14213945827621e-26	50.9312845997788
GP2	-2.71159658910016	6.39756033401123	-13.3969845939077	4.21027075822453e-27	7.18790039986434e-26	50.9240608356104
CD53	1.6272997969691	9.32020420225238	13.3948439336328	4.26472396259548e-27	7.27452784533585e-26	50.9112713051903
CHML	1.00827885354006	7.72719665356504	13.3920936973048	4.33571976826757e-27	7.38919754245879e-26	50.8948394721539
KCNH6	-2.1018120231981	6.37821669489696	-13.3840758934952	4.54952252732634e-27	7.74011215391223e-26	50.8469332947249
CLDN16	-2.6924398360874	6.90568822752502	-13.3781687531886	4.71376910223369e-27	8.01258982087407e-26	50.8116361738539
EMX1	-2.0869806359463	7.09050743253019	-13.3763845272608	4.76453714154764e-27	8.09186858207904e-26	50.8009744825104
C1orf226	-1.85211438441745	7.37455076669093	-13.3668237934833	5.04605292886654e-27	8.54776070465474e-26	50.743841295091
CNTN3	-3.81274536105868	8.11775317468665	-13.3613711608125	5.21400348420009e-27	8.81701935175474e-26	50.7112552894522
SLC25A5	-1.07236018677375	13.7816009192052	-13.3605764624839	5.23894462927896e-27	8.84393417650631e-26	50.7065058904122
RP11-532F12.5	-1.24729138609091	9.13011175205044	-13.3573645949114	5.34097044293528e-27	9.00066033629308e-26	50.6873103061291
CD33	2.3888269686857	6.28989609526074	13.3551277416924	5.41319781671573e-27	9.11454158159893e-26	50.6739415448565
TRIM22	1.54146773342777	11.5019136577474	13.3490191678501	5.61546423035711e-27	9.43889223419974e-26	50.6374318036759
APOBEC3G	1.75047096551723	8.52577967811691	13.3430084209585	5.82187819478448e-27	9.76909167290933e-26	50.6015049287207
WNK3	-1.42818973639812	6.68535614052343	-13.3418582355615	5.86223418289723e-27	9.82839416172822e-26	50.5946299420461
LXN	1.2339173270658	10.3838612587371	13.3403355559804	5.91609093912269e-27	9.91021079622784e-26	50.585528349639
HDAC6	-1.02239965610401	9.47656480415513	-13.337224162821	6.02768569268028e-27	1.00885236456738e-25	50.566930096868
DEPTOR	-1.16439643481496	10.326382336281	-13.3366924755566	6.04696525416501e-27	1.01121563153908e-25	50.563751905061
GK3P	-1.71925093289812	8.36549148100748	-13.3356422082776	6.08523075954973e-27	1.01674712409561e-25	50.5574738294588
PLIN2	2.01468796342618	12.6629024987544	13.3233354611645	6.55210028711723e-27	1.09196099938104e-25	50.4839049631379
CTDSPL	-1.0277802976441	9.10457916575268	-13.3212948762867	6.63290764882711e-27	1.10448901452305e-25	50.4717057663529
ABHD14B	-1.17731255678169	10.7234903368191	-13.316227503796	6.83791906273244e-27	1.13766023523339e-25	50.4414106847085
KLHL6	1.68519970004147	6.93185822511087	13.3104966416805	7.07743017122529e-27	1.17451781478276e-25	50.4071474360719
AGPAT3	-1.12069164813013	9.80273227499943	-13.307625148277	7.20058037005648e-27	1.19192715095217e-25	50.3899789611651
SIRPA	1.09213921428898	9.28699148783818	13.3055932061369	7.28901894195484e-27	1.2055483733618e-25	50.3778298657197
SLC16A10	-2.36070626155052	8.0859828084193	-13.3050181203586	7.31424598566244e-27	1.20870073417368e-25	50.3743913591287
HPCAL1	1.54647388705914	11.643647159921	13.2996334909826	7.55473447043737e-27	1.24529218575359e-25	50.3421952338554
NQO2	-1.5828634824948	11.1719070309196	-13.2972685942931	7.66284295012287e-27	1.26205091579377e-25	50.3280544438775
SLC27A4	-1.54712566148893	8.41008077374178	-13.2967545982659	7.68654386416526e-27	1.26489146258417e-25	50.3249809925196
ARL4A	1.31728584254941	9.30892387393051	13.2944454165032	7.79393174354108e-27	1.28148714967837e-25	50.3111730274366
SCNN1B	-3.40354425327538	6.58772456814647	-13.2878824099816	8.10741657913607e-27	1.32968416346852e-25	50.2719275140265
NACAP1	1.74226643910021	13.6278402656446	13.2856335557282	8.21771351323067e-27	1.34552186420892e-25	50.2584793200513
ABCB1	-1.90395704152643	9.86721716109481	-13.2710986054235	8.96774817339678e-27	1.46465747042003e-25	50.1715541521422
TAGLN2	1.21512902720031	11.3233998650855	13.2686989831021	9.09800624252632e-27	1.48469462404058e-25	50.1572024188207
TNFRSF1B	1.32412918229842	9.01021874184952	13.2666786972648	9.20914084084856e-27	1.50158029400824e-25	50.1451192193638
SIGLEC10	2.20735271355898	7.30556804811323	13.262273812737	9.4561866342649e-27	1.54058023146266e-25	50.1187732143076
FCAMR	-3.12259783045374	9.45475733892302	-13.2611954581577	9.51767008193734e-27	1.54930910245756e-25	50.1123233392432
DNAJC6	-1.72260230020475	8.67386355072921	-13.2535311445471	9.96634641134485e-27	1.62099936361782e-25	50.0664798100768
LY86	1.64315901586987	9.41035466375605	13.2531759587846	9.98764533692794e-27	1.62311659169528e-25	50.0643552250638
KIAA1161	-1.39907793957106	7.23871399977876	-13.247427144317	1.03387847695794e-26	1.67878908615565e-25	50.0299671931503
APOBEC3C	1.80017469626599	8.5995828551522	13.2366388136186	1.10314513027934e-26	1.78934488707463e-25	49.9654297844288
CNDP1	-2.66714568452776	7.28027415250825	-13.2365415988344	1.10378997319926e-26	1.78934488707463e-25	49.9648482062344
HGD	-1.5276056301394	10.2484658056201	-13.2359895426213	1.10745902436769e-26	1.79380904285804e-25	49.9615455741012
RAP1GAP	-1.67961512236538	9.07873567349546	-13.2329152782466	1.128115567112e-26	1.8227483099611e-25	49.943153772926
ALDH5A1	-1.16097607515593	9.80193721669954	-13.2283825242416	1.15927784332814e-26	1.87155572087217e-25	49.9160357464268
IL10RA	1.94610289603495	9.67929000873203	13.2229477879496	1.19777960153065e-26	1.92825007574465e-25	49.8835201867368
ASPM	2.2219902826299	5.58285876114204	13.2228436119456	1.19852999816172e-26	1.92825007574465e-25	49.882896897277
SOWAHA	-3.42067050285703	7.22212321582256	-13.2227347459598	1.1993146805106e-26	1.92825007574465e-25	49.8822455469185
ALOX5	2.2527576136736	8.8903127321299	13.2070831307184	1.31765278932068e-26	2.11158438412887e-25	49.7885954929368
ADCY7	1.6381885882495	7.82826291207677	13.2010668694736	1.36619084658726e-26	2.18757960802808e-25	49.7525947300682
MCCC1	-1.05523554362714	11.0534802372424	-13.1952645809175	1.41469793147543e-26	2.26340120481526e-25	49.7178727937932
THEMIS2	1.64259428676368	8.78998509179904	13.1925263816789	1.43818452978462e-26	2.29722726970243e-25	49.7014863855117
ACLY	1.02826052026623	11.899423160662	13.1915660477771	1.44651383607983e-26	2.30865021769777e-25	49.6957393075903
LEPROTL1	1.02462723843455	10.8732395478915	13.1881746101774	1.47631734205924e-26	2.35429972229609e-25	49.675443056829
GSTZ1	-1.17319984559259	8.35857169338126	-13.1834765862531	1.51862149586245e-26	2.41979371523644e-25	49.6473266056652
OLFM4	-3.87325876689961	5.61508670389139	-13.1793695583645	1.55659715759011e-26	2.47627822172148e-25	49.6227462956136
CSF2RB	1.59314988435038	8.76983612744668	13.1730472762036	1.61692313829328e-26	2.56807751923906e-25	49.5849063410722
CDC6	1.45049322571597	5.68427310502634	13.1713683507223	1.63333283126332e-26	2.59203968906314e-25	49.5748573796657
MME	-2.44631742999885	11.3272076112721	-13.1693066086843	1.65371244530099e-26	2.62225810804645e-25	49.5625169534536
ACOT6	-3.2060073452121	5.15336831489691	-13.1675962157583	1.67081218569249e-26	2.64723104505959e-25	49.5522793608271
SHC3	-1.21064150460437	6.03912867218439	-13.1607918498101	1.74061049141417e-26	2.75114717913115e-25	49.5115503940198
ZNRF3	-1.14001541382643	10.7115691734433	-13.1586916457675	1.76273819784631e-26	2.77939709892115e-25	49.4989787639242
PAQR7	-1.02510474327424	8.36442081674366	-13.1483580473528	1.87578415620464e-26	2.94875167526872e-25	49.4371199394037
ELF5	-3.39267558908436	6.23833766778139	-13.1479582151877	1.88030114653917e-26	2.95288639190874e-25	49.4347263756137
NEDD4L	-1.18328799470899	9.81932259733807	-13.1435231441249	1.93114149057057e-26	3.02787536589541e-25	49.408175699927
EVI2A	1.9819181716842	9.33402975971456	13.1426853940464	1.94089826871275e-26	3.0407406209833e-25	49.4031603888302
CHGB	-2.81521758001227	7.4998083611512	-13.1408544908879	1.96239386751985e-26	3.07196145443463e-25	49.3921993170784
ZMYND12	-1.28516097263546	8.57023232657754	-13.1378121745536	1.99864039940582e-26	3.12620536216718e-25	49.3739855507611
FCGR2C	1.97812418890943	7.76102998597586	13.1316515792773	2.07410461682933e-26	3.24165680903014e-25	49.3371020057674
TPTEP1	-1.48542289341535	6.12468844174817	-13.1309215979352	2.08323352212061e-26	3.25333018327026e-25	49.3327314905942
PLXNB1	-2.00124849515896	7.99411335756302	-13.128575907635	2.11284117954953e-26	3.29694062722861e-25	49.3186873102849
CDON	1.42635393298097	6.63580778586001	13.1253978512015	2.15362834332931e-26	3.35791264128171e-25	49.2996591837529
TMEM116	-1.11537860638982	8.42968374277377	-13.1225497032842	2.19085088700394e-26	3.41323422371941e-25	49.2826059619874
SEMA5A	-1.23952453352907	9.34204447962464	-13.1220269266546	2.19775271472173e-26	3.42126731182139e-25	49.2794758105123
C1orf115	-1.23125777991476	10.2647350338403	-13.1210588116488	2.21059155005661e-26	3.43852252298092e-25	49.2736791418148
ADAP2	1.34576017020763	9.34470549488028	13.1165069099248	2.2719713663049e-26	3.52839673599127e-25	49.2464237112814
CD200	1.31131305790823	9.39122407760998	13.1107515112792	2.35202852122268e-26	3.64983428245791e-25	49.2119608230099
TACSTD2	-3.17120989288479	9.53614195772937	-13.1105724197411	2.35456447704796e-26	3.65087889127081e-25	49.2108884137149
IFI44L	1.97743737004716	9.98151881788806	13.1052775936027	2.43078957200173e-26	3.76014560549818e-25	49.1791821032607
C14orf37	-3.06994388853181	7.04749988106877	-13.1028533718787	2.46650885105094e-26	3.81239013972772e-25	49.1646650554928
OAS3	1.39763808894792	7.83655435861724	13.0994657310184	2.51730550223274e-26	3.88477720773696e-25	49.144378313191
RASGRP3	1.07502978651818	8.29480155296116	13.0944366415892	2.5946533219929e-26	4.00099216819345e-25	49.1142609266949
SLC7A9	-2.52493932805162	11.3254771744976	-13.0923497165883	2.62744488883311e-26	4.04837204215725e-25	49.1017627774716
SRGN	1.4122852659659	12.1533542431679	13.0910290883649	2.64840977941015e-26	4.07746922754591e-25	49.0938537211926
RP1-142L7.8	1.87275003587511	6.93050471885607	13.0876285228432	2.70316769233861e-26	4.15524577271722e-25	49.0734878745459
STAP1	-2.65251740706965	6.98504158010118	-13.0874384608146	2.70626141653469e-26	4.15674118359432e-25	49.0723495865007
TLR2	2.05925581836051	9.32418138560584	13.0857147203678	2.73448187926347e-26	4.19351411202541e-25	49.0620259760165
TMC4	-2.2287093770789	9.55717868602747	-13.077025190884	2.88129390644388e-26	4.41520557250927e-25	49.0099818328152
GUCY1A3	1.2688225659863	10.7990250440592	13.0735192854351	2.9427382468089e-26	4.50232060103105e-25	48.9889830406574
BST2	1.58998657853997	10.6528822022857	13.0705526008112	2.99575590001772e-26	4.57986114543271e-25	48.9712135375278
TAGLN3	-1.82031750416655	7.46845712155794	-13.070092965044	3.0040551888497e-26	4.5889694190386e-25	48.9684604317854
LHX1	-2.42541858106282	6.01516587726063	-13.0685139121125	3.03274271182861e-26	4.62918414401316e-25	48.9590022242904
PTPRO	-1.18011639482594	13.3268978221488	-13.0665160196143	3.06943292591435e-26	4.68154209455217e-25	48.9470351041159
HLA-DMB	1.573401775046	11.3542148670094	13.0600348225244	3.19154378799745e-26	4.85644927802501e-25	48.908212425121
NNMT	3.34295796958929	6.49047025773518	13.0590940342747	3.20966873420183e-26	4.88024030423753e-25	48.9025769144223
SEMA6D	-2.01752706355876	7.87655852024712	-13.0547643804735	3.2944201770987e-26	5.00522023650832e-25	48.8766409477672
GABARAPL1	-1.25522246903316	10.5355055970665	-13.0542742269661	3.30415485457642e-26	5.01612168821404e-25	48.8737047279085
GRHL2	-2.77794555784668	6.84697191586626	-13.0466036804415	3.4603021534946e-26	5.24504732454297e-25	48.8277537351509
CCDC102B	1.63311007246124	8.04705379938021	13.0457624462717	3.47787033241476e-26	5.26760283191629e-25	48.8227141113271
GIMAP2	1.72650717762508	9.65575792728924	13.0408810793213	3.58158883100128e-26	5.41214799528096e-25	48.7934704914474
EMILIN2	1.44120527652261	7.38778675181382	13.0402067301524	3.59615869947485e-26	5.42997799314388e-25	48.789430479048
RAPGEF3	-1.63072342088196	8.17408944958474	-13.0373814410081	3.65784931645401e-26	5.51462990409094e-25	48.772504027411
IRF6	-1.70164167919136	8.22445553599163	-13.0365230745074	3.67680090252405e-26	5.53894088305679e-25	48.767361445698
DOCK2	2.07378558793079	7.02492316003882	13.0340893283571	3.73107097801877e-26	5.61206907890942e-25	48.752780403999
CCL28	1.92646876039847	8.00882690181932	13.0231285950712	3.98559686451921e-26	5.99031541010062e-25	48.6871095785428
GRK5	1.16877388888035	8.12905419516927	13.0221481235237	4.00919509088746e-26	6.02116586868225e-25	48.6812348844292
SHC1	1.03741100666151	11.0876079373002	13.0213796599848	4.02778840084968e-26	6.0398335782902e-25	48.6766304523698
TNFSF13B	2.1113418305036	9.41200217387192	13.0156212462834	4.16989079611618e-26	6.24814141537317e-25	48.642126795754
EPHX2	-1.94368491545435	10.854246577169	-13.0127750507016	4.24197007634462e-26	6.35128888665227e-25	48.6250722782461
PCDH9	-2.3870328297567	7.15818252601931	-13.0102139244936	4.30789568460192e-26	6.44507232996283e-25	48.6097256324676
RP11-96D1.11	-1.24839091401179	8.11850325081569	-13.0089224743811	4.34152676996257e-26	6.49043349843603e-25	48.6019869742793
FCER1G	1.85794495155011	9.96513445355254	13.0009303473253	4.55557897501045e-26	6.8052433179291e-25	48.5540948920774
IL4R	1.04900279698071	9.53424660048953	12.9985727617836	4.62071715220686e-26	6.88680117612944e-25	48.5399667976251
TMEM45B	-2.35480677294371	8.06141649069889	-12.9968281304207	4.6695194925699e-26	6.95424867286304e-25	48.5295117588346
GJA3	-1.34613184559209	5.9785710402458	-12.9873925020508	4.94254397079436e-26	7.34969038570551e-25	48.472964876565
ANGPTL2	1.52297043513962	8.55849919254376	12.9850909279136	5.01153099945302e-26	7.44098454986968e-25	48.4591712203346
SERPINH1	1.68195284157924	9.66505712537539	12.980855401031	5.14101530282558e-26	7.6216912950135e-25	48.4337865766536
CDKL1	-1.64012100784629	7.8537859519439	-12.9780937157406	5.22724136687764e-26	7.7436661790956e-25	48.4172346849051
TM4SF18	1.31134423111983	10.657731005434	12.9769908836671	5.26207746102696e-26	7.78938490624376e-25	48.4106248859422
GPR98	-1.98778508947151	6.35977386080785	-12.9749856593713	5.32601477303455e-26	7.87213902991735e-25	48.3986064994593
AKNA	2.25797359194695	6.9946564094341	12.9712083658509	5.44857520368632e-26	8.04116155248857e-25	48.3759667294817
TMEM132E	-1.83441612967357	7.74436710689183	-12.9702012887127	5.48172555231177e-26	8.07792023306454e-25	48.3699305704079
SPRYD4	-1.04398004173749	8.79851004689084	-12.9583122004112	5.88868649697157e-26	8.66459209115209e-25	48.2986675268877
PTRF	1.08678331537489	9.9072060313343	12.950290572068	6.18022007494766e-26	9.08673167658658e-25	48.2505829519983
PARVG	1.85562594597439	7.13672178452128	12.9484627789971	6.24864447749956e-26	9.18044850933387e-25	48.2396261514778
DIRAS3	-1.67317889418029	7.77894867948752	-12.9464672368494	6.32421495936205e-26	9.27756654105814e-25	48.2276636267259
KCNK3	2.015006920181	8.06930266061853	12.9387275113899	6.62607305169234e-26	9.71311935229007e-25	48.1812654689936
SLC30A8	-1.61449970268065	6.40723931151352	-12.9346566631418	6.79058636134687e-26	9.94683872167692e-25	48.1568606221044
APOM	-2.55050189944957	11.0784839185868	-12.9322026915187	6.89172660461278e-26	1.00874495686188e-24	48.1421486968857
MAP3K7CL	1.98312631387804	8.40259952402407	12.9318591746483	6.90600444227151e-26	1.01008045570208e-24	48.1400892442546
FAM222A	-1.78770935042691	6.95951926174251	-12.9296733516768	6.99755164192164e-26	1.0227070442209e-24	48.1269846939857
FAM13A-AS1	1.1180546852741	8.57170267543297	12.9249928106983	7.19768999081066e-26	1.05039111042366e-24	48.098923096334
ADH1C	-3.71951482094276	6.45624625917257	-12.9180529839876	7.50503050442146e-26	1.09442777422735e-24	48.0573147473501
CDH16	-2.1780988129575	11.8388759069408	-12.9171504428005	7.54595456691057e-26	1.09957742421472e-24	48.0519033513186
ZGPAT	-1.54882518332478	9.67626214874419	-12.9094555999853	7.90405993026377e-26	1.14749385609807e-24	48.0057659186953
MNDA	1.81679044402479	9.63426997851944	12.9015781137613	8.28829586330992e-26	1.202385718912e-24	47.9585311452648
CEP85L	1.0017635915886	8.09310949931911	12.8992686832788	8.40444650672722e-26	1.21833392814606e-24	47.9446829740835
ZNF503	-1.52555640429037	9.39281393691533	-12.8955157662001	8.59668160097605e-26	1.24436013809106e-24	47.9221787312215
DCLK1	1.86072540688477	7.36587204828333	12.8943385216442	8.65788566491141e-26	1.25137095240855e-24	47.9151193189662
NFATC2	1.46961662292934	7.41790410369438	12.894126305472	8.6689649386638e-26	1.25204895971166e-24	47.9138467476319
CR2	-3.51302897985593	5.71397218029096	-12.8910228919036	8.83261724971509e-26	1.27474569570815e-24	47.8952366943677
SCD5	-1.57187062287864	8.96710259833702	-12.8908263644191	8.84308425157255e-26	1.27531720564069e-24	47.8940581782291
QPRT	-2.28607839637708	10.2695394330881	-12.8904308059106	8.86418925545195e-26	1.27742092071767e-24	47.8916861287926
CHST11	1.46843946234798	8.0382128305518	12.8895818246824	8.90965700867271e-26	1.2820878686709e-24	47.886595016179
FREM2	-2.04173986178244	10.3340329655557	-12.8864881685999	9.07732420644319e-26	1.30387171016017e-24	47.8680429731417
GOT1	-1.37336417392244	11.3177368843823	-12.8841559912184	9.20580636760534e-26	1.32082429720862e-24	47.8540571417537
GDPD3	-1.43943753260528	8.69764043758333	-12.880595259286	9.40549125741232e-26	1.34848736762271e-24	47.8327034205942
HSPG2	1.69324632958447	10.3883294072231	12.8695737254561	1.00514777555289e-25	1.43794826664679e-24	47.7666044067168
COL21A1	2.33629409960401	8.23089864675671	12.8632133374142	1.04442891544307e-25	1.49196518321929e-24	47.7284575601873
IKZF1	1.44580361705989	6.99593241052641	12.8524428946247	1.11448218157234e-25	1.58740815963926e-24	47.6638579109922
ARHGAP9	1.75220902995573	8.15209998738506	12.8464767386187	1.15529207237404e-25	1.64076589322166e-24	47.6280719961723
EZH2	1.77570080086208	7.55239023705845	12.8452134079896	1.16412364643653e-25	1.65211146607599e-24	47.6204941894133
PAX8	-1.11872039487512	9.99989081568415	-12.8381344116658	1.21487595617076e-25	1.72164525415696e-24	47.5780314016459
CLEC14A	2.24448734126891	8.65787482066061	12.837653493078	1.21840314601861e-25	1.72539618922101e-24	47.5751465884218
CRYM	-2.11048265070666	10.8438218001734	-12.8335281990655	1.24908340629122e-25	1.76629045309535e-24	47.5504004920134
COL6A2	1.71163809114422	9.29327099851178	12.8282207804282	1.28969549170585e-25	1.82109091800741e-24	47.5185624255231
CEP55	2.88233823702817	5.61342292047264	12.8278844569692	1.29231310932444e-25	1.82347333546794e-24	47.5165448612127
SLC3A2	-1.33326098629992	10.5156455908614	-12.8049991970199	1.48351011658236e-25	2.08275893802992e-24	47.3792500469757
TPMT	-1.05855052993576	9.11436194022928	-12.7944298195991	1.58113193189135e-25	2.21347176665275e-24	47.3158356824124
DOCK9	1.00124860858238	8.62124209821532	12.7942341891602	1.58299817870832e-25	2.21450259132793e-24	47.3146619006038
SLC4A11	-1.87754788960362	7.77032053887842	-12.7910395251949	1.61378805981299e-25	2.25435724763184e-24	47.2954937545251
COL8A1	2.25687019089285	8.5211799801841	12.778358578747	1.74203341050929e-25	2.43004361655314e-24	47.2194041832907
GCAT	-1.61763113081122	8.44892900590046	-12.776695656142	1.75959074448497e-25	2.45278940264303e-24	47.2094257547278
COL4A2	1.33847966700507	11.9665086826136	12.7737236832766	1.79141150700194e-25	2.49359901461158e-24	47.1915921021739
FKBP10	3.38015061688133	5.65100655808427	12.7734046538701	1.79486139051448e-25	2.49662799096475e-24	47.1896777141613
MYO1G	1.49795492793773	7.89779310427291	12.7649677667144	1.88854853098048e-25	2.62136421095512e-24	47.1390496259115
CP	3.8568857001424	9.08472515827908	12.7570071334055	1.98143115588751e-25	2.74834177100066e-24	47.0912773875003
BNIP3	1.13326606575941	12.8667952464998	12.7375776135816	2.22778638012791e-25	3.07265202421724e-24	46.9746714038549
FCGR2A	1.75682701680955	8.97407709762524	12.7337384549499	2.27997801303625e-25	3.14242539222907e-24	46.9516293766928
MYLK3	-1.16818549496778	5.69637275726476	-12.7324031305662	2.29841656730166e-25	3.16561253004535e-24	46.94361486433
OVOL1	-1.35716848066291	7.73066564883544	-12.7319566844777	2.30461445930708e-25	3.17191985870502e-24	46.9409353177979
ALDH1B1	-1.65460972242987	8.13704050084308	-12.7288165848684	2.34868281603554e-25	3.22803888579807e-24	46.9220884302873
PCSK1N	-3.23209520946557	8.98358716591781	-12.7271923137289	2.37180790903318e-25	3.25745154719871e-24	46.9123394328813
ITGAX	1.89968751024263	6.63971343381026	12.7270805673321	2.37340721944985e-25	3.25745154719871e-24	46.9116687196846
KIF20A	2.6901477539643	5.86278914957011	12.714642671107	2.55833484532036e-25	3.50381628873023e-24	46.8370128628921
ENO1	1.02085297438516	12.7912300851283	12.7145308177872	2.56006169981208e-25	3.50381628873023e-24	46.8363414658889
FCGR1B	2.15727928323965	8.73144421517355	12.7120185833583	2.59915584454738e-25	3.55483987419987e-24	46.8212617380873
FAM198B	1.58113626119558	10.35137537467	12.7082704391092	2.65859617718272e-25	3.62601436858762e-24	46.7987630939946
SYN2	-1.26016016539007	6.13254688473011	-12.7007150574553	2.78258159824312e-25	3.78720949610881e-24	46.7534098344703
KIF11	1.15471862917608	7.02451031986034	12.6990143205961	2.81127963557055e-25	3.82361343355637e-24	46.7432004622669
TCIRG1	1.65936056359276	8.79600764213788	12.6976137378741	2.8351352019582e-25	3.8533852165866e-24	46.7347928252773
RGS18	1.62452330987593	7.88881966242809	12.6923622579535	2.9263997269339e-25	3.97191885375191e-24	46.7032679122446
POU5F1B	1.73724917648619	8.37743466162431	12.6801033777849	3.15105306737853e-25	4.26592123367005e-24	46.6296741046022
CLNK	-2.10471307423316	6.16720593277808	-12.6766773761956	3.21686823207771e-25	4.3510973416488e-24	46.6091059999811
HMCN1	1.76606487796715	8.17174531874713	12.6720011706362	3.30892664995906e-25	4.46944544538577e-24	46.5810317201432
KLK6	-1.77567515374405	7.52187818934632	-12.6695515728848	3.35819848827986e-25	4.53287411651494e-24	46.5663249573129
FER1L4	1.43108776727196	7.38988575766288	12.6600636195224	3.55607163905379e-25	4.79006515833782e-24	46.5093601054795
RELL1	1.11794275977084	10.4354203870387	12.6594381757276	3.56951805018948e-25	4.8048752929714e-24	46.5056049067129
GRAMD1C	-1.38647007519344	10.3051429112481	-12.6578205459074	3.60453194102531e-25	4.84867683679856e-24	46.4958925183672
RGCC	1.75363868712256	10.6448499008804	12.6554771561968	3.65586561259413e-25	4.91098767246281e-24	46.4818224766574
SLC27A3	1.04045775107353	9.03492516928367	12.6482204023312	3.81951773672641e-25	5.12029604118338e-24	46.4382509438705
C1orf162	1.72480033107222	9.24033865390956	12.645908749161	3.87317389693726e-25	5.1886763640515e-24	46.4243708431225
VSIG1	2.5037907898942	5.66202028524724	12.6416917204326	3.97300690637787e-25	5.31878158183742e-24	46.3990497211639
DDC	-3.07025650956673	11.8445826473462	-12.6372668549822	4.08053031330407e-25	5.45527377970304e-24	46.3724801257603
DACH1	-2.18599277805863	8.43497625721337	-12.6362646823007	4.10528463867882e-25	5.48462669621446e-24	46.3664623952016
SLAMF8	2.09670733683062	7.47520981888969	12.6331890874269	4.18219618009098e-25	5.57977283414588e-24	46.347994250047
PRDM16	-2.45892603542222	6.75297766423159	-12.6323745907553	4.20280475910671e-25	5.60345377372329e-24	46.3431033673567
FAM184A	-1.18549290355433	7.5805011277789	-12.6305953405405	4.24817795147396e-25	5.66009787022013e-24	46.3324192789213
TAPBP	1.19192423433124	10.0385260133812	12.6301448243459	4.25974427415612e-25	5.67165271937404e-24	46.3297139939904
DLL4	1.56410174844977	7.78703615804594	12.6297453406245	4.27002677638579e-25	5.68148369249051e-24	46.3273151471781
HIST1H2BK	1.68381130293758	10.9784528303565	12.6214872113903	4.48824034369895e-25	5.95968987101326e-24	46.2777252232055
EDDM3A	-1.64695953848045	5.11057373429104	-12.6173455892497	4.6018462180214e-25	6.0981463169034e-24	46.2528541734757
BEND7	-1.06963207316568	8.92111881524403	-12.6168641677589	4.61523707774183e-25	6.11175888423392e-24	46.2499631373593
MTTP	-4.03713384707241	6.94987405150953	-12.6166048373977	4.62246657107087e-25	6.11719934682092e-24	46.2484058021152
BTK	2.31106044317214	6.96469848935823	12.6098830261944	4.81386025399625e-25	6.3618912419469e-24	46.2080392489978
SLA	1.74825975097339	9.303227968227	12.6033850415869	5.00641685969681e-25	6.60565444551044e-24	46.1690157261458
CLSTN2	-3.20783246201611	7.22620092310551	-12.6033593265694	5.00719399380418e-25	6.60565444551044e-24	46.1688612929285
BIRC5	1.58064707249396	5.93154784766474	12.5932330636944	5.32279829235794e-25	7.00614665761741e-24	46.1080460407847
RALGDS	1.0131405330117	9.418854944971	12.5928936020372	5.33371635042717e-25	7.01580582228336e-24	46.1060072920519
RNF166	1.30050321934848	8.45410380135365	12.5806260965891	5.74368260755428e-25	7.53988181014443e-24	46.0323287962176
PMP22	1.5744550190327	9.43334479752908	12.5740174048561	5.97745826051641e-25	7.84094350383043e-24	45.9926355089159
SELPLG	1.59810911712625	7.73852540276522	12.5692037916338	6.15370701410107e-25	8.04886671687187e-24	45.9637231862159
SOSTDC1	-4.3271369806761	7.95693527849029	-12.5593760972722	6.5298587142064e-25	8.52622924315332e-24	45.9046926954852
LTB4R	1.07369927258437	6.92670127764369	12.556090080057	6.66069520903367e-25	8.69127599213388e-24	45.8849545615514
TCEAL2	-3.89842545231591	7.57148275948303	-12.554358777345	6.7306809293689e-25	8.77675419392555e-24	45.8745550333817
IL17RB	-2.78430798944796	10.5907347236579	-12.5536719632816	6.75864796449805e-25	8.80736312873652e-24	45.8704294829037
TMPRSS4	-3.47646371889292	5.41437917673763	-12.5522917268942	6.81520329986013e-25	8.86926756135183e-24	45.8621386532909
TTC38	-1.47511831911361	8.42642886809866	-12.5503982845912	6.89355858444318e-25	8.96528564674863e-24	45.8507650146874
C1orf216	1.01583886167382	8.29996237730282	12.541103629977	7.29146682496459e-25	9.45141919989954e-24	45.7949321104379
AK055981	-1.28707917768735	9.31925090409802	-12.5408417280588	7.30300586506791e-25	9.46011975872214e-24	45.7933588384649
KLRD1	1.29229728423109	6.26020367520122	12.5370678375828	7.47132161699848e-25	9.6589994968043e-24	45.7706885084285
CALML3	-1.55469158216312	6.77855270335567	-12.5254326404981	8.01508113048774e-25	1.03347088866072e-23	45.7007920356409
TUBB6	1.32813858543329	10.2464529800935	12.5231695202926	8.12535953296304e-25	1.04696306449816e-23	45.6871963622198
PTPN3	-1.0880995986938	9.70611624443678	-12.5138163845717	8.59746214441503e-25	1.10492892175994e-23	45.6310062497326
AQP6	-2.54618946632315	7.03199166921932	-12.5108625698373	8.7521865503484e-25	1.12407669856015e-23	45.6132604339065
ELK3	1.00992587926773	10.3961263117532	12.5102713582289	8.78348801255267e-25	1.12735809795691e-23	45.6097085517753
PDZD3	-2.50655683006914	7.54949906581279	-12.5084252084904	8.88195458921218e-25	1.13925018320661e-23	45.5986171998227
TMEM44	1.52473813243253	7.35785413769446	12.4996596380693	9.36476332807171e-25	1.20039239023465e-23	45.5459541174543
MT1E	-2.29872223189503	12.8333772939703	-12.497133791649	9.50870015475853e-25	1.21804584531446e-23	45.5307786513086
GBP5	2.17539312679326	7.32510885662771	12.4963911102156	9.55144194574813e-25	1.22272182034433e-23	45.5263165414693
H2BFXP	1.74936680050819	5.51079546639447	12.4906172959317	9.89035302160298e-25	1.26528086730024e-23	45.4916264346101
B3GNT5	1.09870252757308	8.51836600075055	12.4853441526122	1.02103789700502e-24	1.30451901847466e-23	45.459943817198
SYTL3	1.36937624815358	6.91652348004194	12.4818784366195	1.04263352574234e-24	1.3312426365488e-23	45.4391204367152
LRRC25	2.60999306095474	6.36667105606523	12.4770778105853	1.07330437742276e-24	1.3695112300201e-23	45.4102759703031
GDPD5	1.12882122738842	7.5333489780357	12.4744135304637	1.09071416562203e-24	1.39082022980001e-23	45.3942674853171
ST6GALNAC2	-1.82885989104388	8.12885284570855	-12.460756660039	1.18449239650711e-24	1.50843836771559e-23	45.3122070384179
LYPD6B	-2.70159540551065	5.95016228581318	-12.4600434503162	1.18960572536986e-24	1.51298394623776e-23	45.3079214476404
IFI27	1.76077552082718	11.0795145996764	12.4550676941591	1.22589912362355e-24	1.55712228929994e-23	45.2780224422838
ICAM1	1.28125121639791	8.94695928757289	12.4507590356716	1.2582206052411e-24	1.59714155713214e-23	45.252131577889
KCNMB2	-1.63288489560981	6.70923011851736	-12.448931213709	1.27218835786644e-24	1.61382651299834e-23	45.2411480248985
CCDC109B	1.41910965404003	8.62525095393482	12.4466666992609	1.28970858559605e-24	1.63499343913952e-23	45.2275402528153
BAG1	-1.01858771954289	10.2884213105652	-12.4462988738049	1.2925771054401e-24	1.63757069744799e-23	45.2253299304429
CLYBL	-1.28778925267178	9.24998333169255	-12.4444177889363	1.30734702857914e-24	1.65521281738517e-23	45.2140261463995
HLA-DPB1	1.86404608503561	11.962901718068	12.4438089090657	1.31216392448497e-24	1.66023891258754e-23	45.2103672604386
APOLD1	2.61152996462617	11.0832600540094	12.4296066423535	1.4296983863382e-24	1.80661887000918e-23	45.1250208051598
NRARP	1.4532280362048	9.07809382688768	12.4287441982466	1.4371659268979e-24	1.81488498719536e-23	45.1198379458102
RNASE6	1.85938942401116	10.008303863977	12.4180573460268	1.53300218561927e-24	1.93217426597762e-23	45.05561410261
RNF152	-1.65032547783489	6.84698939958044	-12.4115267895874	1.59468740027691e-24	2.00733965048344e-23	45.0163669195279
PHGDH	-1.41165851455525	9.16113273980236	-12.4114062996234	1.59584853692262e-24	2.00751190469489e-23	45.0156427942783
PREX2	1.82105578300646	7.17258678606411	12.4068276362424	1.64060470549072e-24	2.06248952039209e-23	44.988125565378
RDH12	-3.14639784790666	7.39308905942896	-12.4030959108244	1.67800948506466e-24	2.10546145312307e-23	44.9656980468039
LAYN	1.30117357506807	6.85481391968215	12.3968192511904	1.74285793710093e-24	2.18124346802306e-23	44.9279750005014
PPP1R18	1.48610103055071	9.35724983401245	12.395422839234	1.75762286838555e-24	2.19831848101394e-23	44.9195823955223
KLK7	-2.11406635183978	7.21366005083899	-12.384960753979	1.87229893472714e-24	2.33876270374233e-23	44.8567028813238
CSDC2	-2.44200194130488	7.74307473179885	-12.3847222265283	1.87499895134193e-24	2.34064359537264e-23	44.8552692543045
SHISA3	-2.71355067129911	9.38109224345119	-12.384327004862	1.87948124970774e-24	2.3447455768951e-23	44.8528938422245
CPNE4	-2.01265056385405	5.48534761449342	-12.3833623265945	1.89046695840047e-24	2.35545212445587e-23	44.8470957972747
ECSCR	1.07733143774661	8.97466717794809	12.3826311049351	1.8988368623414e-24	2.36437761531315e-23	44.8427008951222
EIF4EBP1	1.25848872928024	9.5039965769278	12.3814462495888	1.91247805860426e-24	2.37985126797364e-23	44.835579473256
CASP4	1.01262234328424	9.02188490419955	12.3743048743177	1.99679817871141e-24	2.48320098379219e-23	44.7926566288619
RAPGEF5	1.17037426946203	8.38315879369864	12.3619304585466	2.15180808751516e-24	2.67088579526343e-23	44.7182788030748
CGN	-1.94604848352891	8.23654114143615	-12.3585427044735	2.19630643935858e-24	2.72094879298286e-23	44.6979158722183
KSR1	1.40432624504986	8.89854072991996	12.3490150701777	2.32645036302371e-24	2.87310023093268e-23	44.6406466567548
GMPR	-1.91210002878891	7.88376688599274	-12.3472000717636	2.35210389189684e-24	2.90112549888522e-23	44.6297367979935
HCK	1.67191869359278	8.47132406632824	12.3380093624827	2.48641792954612e-24	3.05717095364958e-23	44.574491117641
HLA-DPA1	1.57410854822589	13.1325898110596	12.3336505370393	2.55277481763045e-24	3.13286372265118e-23	44.5482895919346
ABCC1	1.12903451510996	9.32675455408118	12.3201661664416	2.76948504679895e-24	3.39456769432224e-23	44.4672312270847
OXCT1	-1.54381970190624	10.631224210429	-12.3194662692844	2.78122278306155e-24	3.40682408282645e-23	44.4630238711048
COL4A3	-1.75448436317656	8.70934906084431	-12.3148522929095	2.85985770561862e-24	3.49877348142442e-23	44.4352872663646
COL5A2	1.54800099186302	9.27800080545365	12.3111510141755	2.92454268851745e-24	3.57567761398961e-23	44.4130370504833
TYMP	1.91065726655899	8.01197648971134	12.3086116208646	2.96976678652477e-24	3.62870693572936e-23	44.3977713844049
NR3C2	-1.65387819295328	9.60097248842946	-12.3049894806803	3.03548697922262e-24	3.70439036773251e-23	44.375996577093
RPA4	2.0828027894176	6.01230134865648	12.3016627029394	3.09712930303205e-24	3.7749152493859e-23	44.3559971976436
DPYS	-2.31760266250345	11.8254908711447	-12.2996938295718	3.13419914758033e-24	3.81772337435841e-23	44.3441609705155
KIF14	1.7100449874429	5.89372998220774	12.2955651591482	3.21338129244787e-24	3.90931470829831e-23	44.3193405641588
CCR5	2.51201614315503	8.23741873200066	12.292300157248	3.27741421661179e-24	3.98215907762923e-23	44.2997121182553
VAV3	-1.01306229429033	11.168971304993	-12.2885733001167	3.35206672071262e-24	4.0654180482207e-23	44.2773069203816
THRB	-1.38957180252625	8.08892529226843	-12.2836338828005	3.45363599085838e-24	4.17825998671811e-23	44.2476117291766
ESRP1	-3.02673569492613	6.92953379859776	-12.2795552670788	3.53982149169069e-24	4.27988657715274e-23	44.2230913215906
GATM	-1.84835514363217	11.8879859441105	-12.2790270630976	3.55113925704136e-24	4.29092344628568e-23	44.2199157724403
C4orf6	3.15673994675608	4.86170194567919	12.2765015526151	3.60575546512458e-24	4.35334969919653e-23	44.2047324141449
HECW2	1.15035744882097	7.72529443596382	12.2703566684218	3.74217938701589e-24	4.50509667113786e-23	44.1677890382748
PPM1E	-2.05431661595487	6.16711463371746	-12.2621460740238	3.93255841117277e-24	4.72847928224387e-23	44.1184257215987
GPR85	1.4649895217477	5.55853957606691	12.256905796024	4.05909989985022e-24	4.87465067016939e-23	44.0869199325512
PDGFD	1.67174311848979	9.42954527629022	12.2547925406181	4.11127585582445e-24	4.93428631342948e-23	44.0742144427372
PYCARD	2.0718776522307	8.77322131755454	12.2472120174278	4.30401968825655e-24	5.15929552722569e-23	44.0286377293098
AEN	1.562348033688	7.76888294940851	12.2461254461623	4.33237811612114e-24	5.19011483483241e-23	44.0221048305252
FGF11	1.78856516884523	7.49961705634059	12.2457222301956	4.34294914055778e-24	5.19960050127013e-23	44.0196805320009
SUSD4	-2.38644078003357	6.76235935837683	-12.2451129054485	4.3589726551614e-24	5.21559860003103e-23	44.0160170198028
FLNA	1.23187905342676	10.7732104940858	12.24013769272	4.49203932606173e-24	5.36498956438049e-23	43.9861038152569
GCHFR	-1.35844302685911	9.71868005007028	-12.2387565645077	4.52969431077137e-24	5.40666740540853e-23	43.9777998014571
VSNL1	-1.8123402662625	6.34277856595608	-12.2358439216037	4.61014279671174e-24	5.49934197643052e-23	43.96028750233
NXPH2	-1.5799712405801	5.63280394508579	-12.2318240300947	4.723527020328e-24	5.63116825251876e-23	43.9361176926772
METTL7A	-1.04784693107406	11.9390774583273	-12.2305061688162	4.76130224729674e-24	5.67275153463641e-23	43.9281939408643
ISG15	1.23103423023344	9.8726342389429	12.2293592473898	4.79442352757526e-24	5.70874281390933e-23	43.9212979627821
CD163	2.09377834755084	10.1103195549341	12.2280680502677	4.83198715897902e-24	5.74997670484698e-23	43.913534494554
GRAMD1B	-1.30092475455755	9.02598948680671	-12.2270456102559	4.86194084969815e-24	5.78211035881274e-23	43.9073869450394
CDH3	-3.07880386966866	5.68788480527176	-12.2245874077541	4.93471944955703e-24	5.8651040928968e-23	43.8926066431864
GPR65	1.97036000646293	8.13897039821476	12.2162527690366	5.18968782270028e-24	6.14207075103278e-23	43.8424928983872
SLC2A3	1.99111580889526	9.50958828964117	12.2148281598187	5.23456908990765e-24	6.19144958316838e-23	43.8339270619534
MARVELD2	-1.86068112712435	9.16392081513114	-12.2143790802001	5.24879734907603e-24	6.20453433320513e-23	43.8312268483481
ARL4C	2.11522199920922	9.2574638669796	12.2101140567282	5.38587027434235e-24	6.36272884308835e-23	43.8055821218076
BMPR1B	-2.44352109113401	7.43212005031563	-12.1971413183569	5.82520520478632e-24	6.8693259210955e-23	43.727578458289
TOX2	1.7638310258943	7.20145117795103	12.1913890987635	6.03131452344629e-24	7.0995635642657e-23	43.692990425489
PLVAP	1.95299311288775	10.905818803957	12.1887307577975	6.1290156466382e-24	7.21023875500973e-23	43.6770057370617
CYSLTR1	1.20458529491045	6.72885846032364	12.1865055736479	6.21201333991434e-24	7.30349426808526e-23	43.6636255798501
PLCD4	-2.33530524621622	7.23337593140366	-12.1823693256675	6.3692913294973e-24	7.48391731215932e-23	43.6387539583047
ADAMDEC1	3.21622366727642	6.93669614513416	12.1809184620138	6.42539801053608e-24	7.5453190897841e-23	43.6300297483246
CMPK2	1.14802511289989	9.37570402442945	12.180718027922	6.43318781495892e-24	7.54994299313652e-23	43.6288245134755
MPZL2	1.06840688859705	9.0633463515432	12.1659022407908	7.03594599501893e-24	8.237604871946e-23	43.5397343066006
RAPGEFL1	1.89413853380956	4.53123779631899	12.1620409715942	7.20211062984352e-24	8.41947895623628e-23	43.5165154113445
RP11-548H18.2	-1.40405966493903	8.07875641898108	-12.1542156243095	7.55100105433403e-24	8.8090517657079e-23	43.469458995755
NFE2L3	1.50726264687377	7.94838430466098	12.1481843211776	7.83139980546116e-24	9.11988144903347e-23	43.4331904028925
HOXD8	-1.21891462689241	10.6890267057635	-12.1448238817767	7.99212252578206e-24	9.3015207471973e-23	43.4129826290814
ENPP1	-1.56152053139374	7.29232977663589	-12.1432480578298	8.06862319106449e-24	9.38498195380848e-23	43.4035064867837
LILRA2	1.36807022468638	6.65703422922031	12.1409189413114	8.18303702250706e-24	9.50677786627835e-23	43.3895004183107
CYFIP2	-1.49689762034169	11.8889388239678	-12.1384687362617	8.30515123174134e-24	9.64293003500583e-23	43.3747661404542
COPG2IT1	-1.50507792286259	7.18246680111034	-12.133342684347	8.56655337767109e-24	9.91706318068374e-23	43.3439405360961
SLC44A4	-2.54659661411618	8.40624389409724	-12.1296998934536	8.75730439215709e-24	1.01319013448575e-22	43.3220344237257
SUSD3	-1.6420749038407	7.19053847415146	-12.1278726579712	8.85457994655467e-24	1.02384019098835e-22	43.3110462099296
CALCRL	1.21737711084551	8.49374600267867	12.1257860589231	8.966985680995e-24	1.03622613420885e-22	43.2984982635857
MARVELD3	-1.85776163697971	7.478133259676	-12.1159196199935	9.51813346214379e-24	1.09862130579833e-22	43.2391651336522
MATN1-AS1	1.04465964664376	6.94169183597179	12.1133639819154	9.66633731966124e-24	1.11507089539753e-22	43.2237963537178
DOK3	1.27178654810647	7.30701081995029	12.1119165561483	9.75129650652055e-24	1.12420976606645e-22	43.215091983586
CDK18	1.5048261363256	9.36534758873625	12.1088687280209	9.93264437735897e-24	1.14444383981104e-22	43.1967632423364
CXCL11	2.8460978415704	6.69151679029216	12.106860245915	1.0053990651822e-23	1.15774478722126e-22	43.1846847876375
NRG3	2.39210130116532	6.44335349021824	12.1048325242506	1.01780036601587e-23	1.17064961112354e-22	43.1724906041597
SP140L	1.10625432329946	7.67954915166619	12.1036442986678	1.02513839160029e-23	1.17770734683318e-22	43.1653449161225
NCOR2	1.00614645888379	9.29222855620989	12.0945752172426	1.08291700757502e-23	1.24262824540181e-22	43.1108054544946
PBK	2.1060215064928	6.48074338467816	12.070972710776	1.24902140365967e-23	1.42988145387417e-22	42.9688628588149
CHSY3	2.14467240951109	6.44321905429878	12.0644775354292	1.29904769396977e-23	1.48541632171024e-22	42.929801132909
TLN2	-1.24475510553373	9.04807291655421	-12.0635161609019	1.30662064092278e-23	1.4932045446907e-22	42.9240194467539
GZMB	2.09667358341434	7.76652055028767	12.0614080468065	1.32338163245264e-23	1.51147765818411e-22	42.9113412771441
SUGCT	-2.24081430470484	9.38460351139545	-12.0597361315094	1.33682731476115e-23	1.52594516843353e-22	42.901286385927
SMPD1	-1.06177657694721	8.59687467461483	-12.0595839414013	1.33805800469146e-23	1.5264609332915e-22	42.9003711146255
C5orf46	4.32213365573215	6.1300925343761	12.056169013328	1.36597289710323e-23	1.55739981444597e-22	42.879833708719
SLC16A6	1.07068283981527	7.50814620232224	12.0536764997621	1.38671468553492e-23	1.57921098906443e-22	42.8648436773191
CELF2	1.3782357580915	8.70592169977658	12.0500793142616	1.41720579232073e-23	1.61299746362915e-22	42.8432100754207
LST1	1.24859424123217	8.35075906784946	12.0496511085641	1.42087980507223e-23	1.61624047008767e-22	42.8406348272909
PTPN22	1.52080696985626	5.95725003155869	12.0405345740539	1.50140048484585e-23	1.70387655486356e-22	42.7858073992812
LCN12	-1.27417235901836	7.73193278648245	-12.0344354771546	1.55780250044183e-23	1.76278124746879e-22	42.7491268504622
ACTN1	1.13818503009198	10.51097626875	12.029760855741	1.60246200567325e-23	1.81122565450923e-22	42.7210131388611
USP2	-1.94789498811983	7.53435584414754	-12.0296430499877	1.60360386642098e-23	1.8114715952729e-22	42.7203046404824
LRRC19	-2.76203331459163	9.9279011383724	-12.0228851185628	1.67048754867626e-23	1.88593810290933e-22	42.6796615253095
L2HGDH	-1.28677801466108	7.97187945453264	-12.022037649799	1.67906954073186e-23	1.89453563205549e-22	42.6745647226902
TPX2	2.22165627721455	6.69298387929078	12.0094263438124	1.81211619228301e-23	2.038786753878e-22	42.5987182045855
CCL18	3.42186639692516	7.35676610970021	12.001722603241	1.89852504321267e-23	2.1347786759567e-22	42.5523863978096
CYP4A11	-3.08331802474507	9.91454380644709	-11.9998985937838	1.91958021926766e-23	2.15721632554053e-22	42.5414164261535
CDK1	1.09552474689727	7.25699499861387	11.9953042287662	1.97365539791267e-23	2.2167147360281e-22	42.5137849280956
SDS	1.9174938379234	6.76984870097695	11.9923614433847	2.0090894606288e-23	2.25392926954e-22	42.4960863615324
FTCD	-2.58074735282082	9.21117276633447	-11.9763286980304	2.21361810720914e-23	2.47488313081528e-22	42.3996615932353
CAND2	-1.17455931992133	7.22367484857858	-11.9760010872119	2.21800765278308e-23	2.47837696618561e-22	42.397691259365
CENPM	2.46274639121493	4.53094039755165	11.9735812417449	2.25070110913846e-23	2.5120439087702e-22	42.3831376959647
SPAG5	-1.65121485296606	9.54931764720733	-11.9703383945745	2.29527076142027e-23	2.56033077137597e-22	42.3636343814577
HHEX	1.11957109746258	8.18325833326452	11.9682319098577	2.32469410386147e-23	2.59167689087491e-22	42.350965436364
TTC39B	-1.10540359861007	8.59408522064307	-11.959094609787	2.45675360655765e-23	2.73579056448429e-22	42.2960113029477
CAPS	-1.25499849181985	7.18368887635107	-11.9587827820999	2.46139042598556e-23	2.73939755587115e-22	42.2941358879899
DLGAP5	2.9033693517969	5.36205401454062	11.9585871017141	2.46430462524724e-23	2.74108435585815e-22	42.2929590138835
ANKRD13A	1.02365563790242	11.0457350766495	11.9552561582147	2.51444387281431e-23	2.79526860256878e-22	42.2729258272192
DPY19L2P2	1.3979057805757	8.40007733342412	11.9538763395952	2.53551136253721e-23	2.81709111079177e-22	42.2646272270429
EVA1C	1.51006961256137	8.97991216294735	11.9528275092597	2.55164323858124e-23	2.8334082624903e-22	42.2583192789942
RP1-93H18.6	2.47671835258793	7.21151823239228	11.944508354958	2.68328879543795e-23	2.9745349039473e-22	42.2082856384651
EVI2B	1.65786550937711	9.38518384575799	11.9405507007397	2.74827956404666e-23	3.04313735456217e-22	42.1844832377775
GRIK2	-1.3071969626871	4.91401382384027	-11.9388596752602	2.77652663925411e-23	3.07267902895208e-22	42.1743129551683
TTK	2.1519292374889	5.90182048419486	11.9370748915335	2.80665487207789e-23	3.10426799310691e-22	42.1635787862237
NDRG1	1.09204201669502	14.2762278987782	11.9301556259501	2.92657938708892e-23	3.23325983131656e-22	42.1219644779151
CLUL1	-2.03401933421226	6.24471603183802	-11.9247141919724	3.0244791232237e-23	3.33765576216561e-22	42.0892382656828
RHBDF2	1.22683551474185	8.62192911848763	11.9230523047065	3.05502693623401e-23	3.36757440513219e-22	42.0792432446148
ADA	1.96797398322606	7.54288893545351	11.92118352998	3.08974635945021e-23	3.40393136025097e-22	42.0680039520087
FYB	1.70814834548564	8.26695530256195	11.9200545560129	3.11091215911931e-23	3.42340075275572e-22	42.0612140135555
DEPDC1	1.45480680853831	5.23094395735631	11.9144295618077	3.21854933307616e-23	3.53589396743047e-22	42.0273838810892
TAGAP	1.40701824036626	7.343808435273	11.8992917408954	3.52708118603312e-23	3.86834158730068e-22	41.9363414487027
SLC52A3	-1.2956765899817	6.66185298611721	-11.8984948390669	3.54411906850629e-23	3.88485400579725e-22	41.9315487043101
DPEP2	2.52755749299976	6.44447923952609	11.8958867133986	3.60045880712044e-23	3.944404257169e-22	41.9158628671628
KCNE3	1.44319630947761	10.291594681681	11.8928131849781	3.66800274228214e-23	4.01615562826746e-22	41.8973780152566
CYP2J2	3.23150962039663	9.51323501674845	11.8892079889851	3.7488472893622e-23	4.10238179923003e-22	41.8756956295854
LYZ	2.44678495481919	11.5019611212888	11.8826427747144	3.90067331460867e-23	4.26138775323385e-22	41.8362111723635
MYBL1	1.61756269238234	7.01098612157642	11.8671942077902	4.28263752290747e-23	4.67086326162847e-22	41.7433010171763
CAPN5	-1.02674948353506	7.90924102028035	-11.8634147000561	4.3816456142825e-23	4.77618867599125e-22	41.7205705702725
DDX25	-2.10588134950777	6.41814849215969	-11.8624943474263	4.40609975575282e-23	4.80017504797106e-22	41.7150354585144
DUSP5P1	2.97101534138749	5.19273370379902	11.8591019313535	4.49742221763316e-23	4.89150821550457e-22	41.6946330856584
IFITM3	1.01641961287291	13.4090774168618	11.8535904666066	4.64984154562212e-23	5.05447833902651e-22	41.6614866081736
PREX1	1.28634168299968	8.74873675188764	11.8525097286105	4.6803296583833e-23	5.08198232546561e-22	41.6549869602619
KL	-2.20812172705564	11.9365805739458	-11.8510809829995	4.72094226694593e-23	5.12324183221889e-22	41.6463943729712
CSTA	1.98855294832471	8.58061550173989	11.847713674133	4.81805874137754e-23	5.22285029160721e-22	41.6261431488354
ARPC1B	1.34696542898756	11.3765974000339	11.8412852523209	5.00904280900182e-23	5.41789348861074e-22	41.5874823191272
CD14	1.59802247523876	11.137850768779	11.835062226124	5.20113311790642e-23	5.61636407591449e-22	41.5500569268688
FAM83B	-2.21447209727348	5.83497045504929	-11.8297537596883	5.37080424969775e-23	5.79001058799924e-22	41.5181318604641
MSC	1.77685987986275	6.83820813614321	11.8255654458135	5.50856998903179e-23	5.93526460775339e-22	41.4929434808622
ASAP3	-1.16148599684724	7.8235357398056	-11.8240766608711	5.55838707984232e-23	5.98564991086976e-22	41.4839899999281
MPEG1	1.56995353416678	9.80009885508943	11.8238058722298	5.56749639836255e-23	5.99216704621129e-22	41.482361491339
ZDHHC2	-1.20192524675695	9.57735318617336	-11.8209996731124	5.66278027682631e-23	6.08469466258327e-22	41.4654851811052
CDCA3	1.14202208993394	6.84908790833353	11.8182114102664	5.7590701364503e-23	6.18138092027872e-22	41.4487167808559
GPT2	-1.82607854064277	8.15901313097006	-11.8177590132756	5.77484685828676e-23	6.19492192531813e-22	41.4459961038766
MPPED2	-2.04454626142937	7.97158502321841	-11.8160459330538	5.83498084463429e-23	6.25258554259089e-22	41.4356937956691
SIM1	-2.54595496372296	8.39897691290503	-11.8130480281502	5.94172644804486e-23	6.36349162050444e-22	41.4176647090209
EOMES	2.20285806690094	7.95714942746634	11.8107720184331	6.0240698346414e-23	6.44815645489551e-22	41.4039770591678
FRAS1	-1.50824775808668	8.81046652263397	-11.8028193265312	6.32085216721249e-23	6.75844962494259e-22	41.3561507650399
CYBB	1.51902158405763	7.73939809728959	11.7963891281495	6.57147414463529e-23	7.01494127236967e-22	41.3174808052259
ANKRD9	-1.00418843370321	8.72811758194209	-11.7944834619797	6.64764028125153e-23	7.08852567313649e-22	41.3060205515067
APOC3	-2.84600207742962	5.73971300924443	-11.7792562859307	7.28882209914219e-23	7.75535419767035e-22	41.2144485780618
UNC5B	1.02821080435184	9.09249090696446	11.7736589510392	7.53975238619008e-23	8.00930119333004e-22	41.1807881887498
CSNK1E	1.0214819115824	7.89891999801827	11.7705602342311	7.68236472049752e-23	8.15637411468207e-22	41.1621537043563
PIEZO2	1.33324904537386	6.73088514042692	11.763576196019	8.01375984076021e-23	8.50361013097236e-22	41.1201546714785
PLLP	-1.34503983350141	10.0168272915773	-11.7631701225305	8.03346205047328e-23	8.51990382723083e-22	41.1177127301871
ANXA2	1.11325983414947	12.9777749539804	11.7606194487485	8.1583301486356e-23	8.64297905854644e-22	41.1023741682631
NDC80	1.7422551613066	6.96412776496955	11.7598507343345	8.19634172633781e-23	8.67855761720663e-22	41.0977514887799
ANXA1	1.54251371432215	10.7965896740666	11.748141029207	8.79775164949514e-23	9.29526331959328e-22	41.0273355494451
FGR	1.2854284242844	8.42055099474701	11.741002758811	9.18581857892859e-23	9.68960486159426e-22	40.9844103654262
LRP1	1.49970860328237	6.75782303255689	11.7364460152568	9.44244579984837e-23	9.95272602549533e-22	40.9570091401726
AASS	-1.12381830992974	8.41087694400898	-11.7363940072944	9.4454157903063e-23	9.95272602549533e-22	40.9566963999676
LPAR5	1.89681083140997	6.90664730387515	11.7344774112841	9.55551971155162e-23	1.00633331986405e-21	40.9451713238457
KCNJ15	-2.04278425445846	10.7896103565947	-11.7290425374665	9.87476934973432e-23	1.03883845671199e-21	40.9124899569297
WDFY3-AS2	-1.2626580545826	9.41736759031959	-11.7177407986534	1.05732013470593e-22	1.10993129727378e-21	40.8445304515552
PBX1	-1.39550681300976	10.1076655123585	-11.7153829084174	1.07250303345288e-22	1.12526696748625e-21	40.830352168306
AZGP1P1	-2.57563622431689	5.78564895940337	-11.7145021229443	1.07823033362944e-22	1.13067074953469e-21	40.8250559116217
FAM13A	1.01641530971452	11.3579511685944	11.7072768535248	1.12638182219048e-22	1.17990151432984e-21	40.7816098991299
CTD-2540F13.2	1.43261571124752	6.65717945035403	11.7036191082795	1.15157197766273e-22	1.20564418751132e-21	40.7596158481704
AQP11	-1.72421414858126	8.23532813560245	-11.7027670119711	1.15752062540345e-22	1.21122513279671e-21	40.7544922067638
WDR72	-2.39676993093418	10.6528859901561	-11.6980148486868	1.19126431983342e-22	1.24586923182578e-21	40.7259176685928
FGD2	1.04215928541955	8.10823746218346	11.6954919670163	1.20957641443456e-22	1.26434603448016e-21	40.7107477975879
FBXO2	-1.10216369803441	7.18914518833517	-11.6924378262253	1.23212158611404e-22	1.28722553124995e-21	40.6923836050818
HMHA1	1.61540944283567	8.03253091466764	11.6901750320487	1.24909568297087e-22	1.30426352107331e-21	40.6787777546208
NUF2	2.36512248135864	5.65689325841447	11.6897839619533	1.2520528567314e-22	1.30665516182528e-21	40.6764263131635
FZD1	1.09690339027725	9.96723098296877	11.6861697951042	1.27971570398633e-22	1.33481362865504e-21	40.654694992431
PIGR	-3.50490272060519	11.1869487221427	-11.6791477500981	1.33522157351455e-22	1.39196849038892e-21	40.6124731565653
CXCL16	1.27531108070953	9.6290917278601	11.6785502652243	1.34005407800452e-22	1.39626368287137e-21	40.6088806530079
CNTN1	-1.90469546779268	6.48286700143594	-11.6666484484916	1.44004488106855e-22	1.4964708178188e-21	40.5373193653217
CDKN3	1.16142914473683	7.0152452897635	11.6653665285973	1.45125012676177e-22	1.5057200229965e-21	40.5296117509786
PGPEP1	-1.02697041398947	8.81366347613691	-11.6647296885637	1.45684910475293e-22	1.51072939703982e-21	40.5257827225858
NOX4	-2.43237377714625	10.976131765675	-11.6564200422304	1.53191629262775e-22	1.58773280905401e-21	40.4758210790341
DEF6	1.84827933353811	6.86403710344808	11.6555008028773	1.54045447688375e-22	1.59573822898756e-21	40.4702942178963
KLHDC9	-1.04757318387067	9.70326999094015	-11.6435747519077	1.65563744794116e-22	1.71233975420574e-21	40.3985906830791
ERBB2	-1.00735234672737	8.97261902952829	-11.6416714197585	1.67480061528464e-22	1.73124563602129e-21	40.3871473675513
NPDC1	1.06234481550509	9.13256622478645	11.640014703468	1.69166122212326e-22	1.74683183837691e-21	40.3771868088574
ZYG11A	-2.89699550883926	5.6226007697524	-11.6366343699727	1.72659149301069e-22	1.78196243662541e-21	40.3568635834874
CYP39A1	-1.42810802559064	7.62630146925012	-11.6347913588261	1.74593882794525e-22	1.80098184678416e-21	40.3457831063224
DHTKD1	-1.26737469662477	10.7895526471752	-11.6292026993974	1.80594195064094e-22	1.85993989966431e-21	40.3121834816533
CCL5	2.60124555366732	9.2550882439968	11.6280244566426	1.81885305053759e-22	1.87225320049822e-21	40.3050998146058
CXCL9	2.77161968715179	9.23004953165026	11.6274327323653	1.82537189085763e-22	1.87797709653116e-21	40.3015423396746
MYOZ2	-1.78528860246448	4.49967451844275	-11.6267151271936	1.83330886903396e-22	1.88515322792217e-21	40.297228069371
GZMA	2.21755332797794	8.76489834992622	11.626423499812	1.83654422677064e-22	1.88748979027151e-21	40.295474796254
KLF15	-1.71539838996672	9.27675453115632	-11.6260120220718	1.84111893362901e-22	1.89119968449659e-21	40.293000981012
LILRB3	1.33019665438252	8.12709853679078	11.6187178852941	1.92413072757104e-22	1.97233463021259e-21	40.2491488366763
FLJ31715	-1.1775240726174	7.28481043740937	-11.6175954290138	1.93723304127048e-22	1.98472714980973e-21	40.2424007294552
CORO2B	-2.22420935621145	6.63452572267246	-11.615433835439	1.96271690157961e-22	2.00978519091216e-21	40.2294054731898
GPR155	-1.3309220259319	9.48462930241021	-11.6081018651854	2.05167891877736e-22	2.09868763721907e-21	40.185327010833
KIF18B	1.39674098990234	6.91782814311595	11.6020648229383	2.12794707753499e-22	2.17556780243131e-21	40.1490340243008
RP11-61L19.2	-2.80568587835002	6.41187087808625	-11.5987624350178	2.17085997767949e-22	2.21743375141834e-21	40.1291812397987
TMEM72	-2.57244056643498	9.79120673104586	-11.5987396204352	2.17115943107903e-22	2.21743375141834e-21	40.1290440872073
RNF125	1.14712491086886	8.20500293537107	11.5965678384183	2.19985509945559e-22	2.24557083824115e-21	40.115988196855
GLIPR1	1.55616141325173	9.05019152268644	11.5943505411712	2.22954334514458e-22	2.27232553413878e-21	40.1026587627783
PFKM	-1.01799904564302	11.1917121012068	-11.5831973339393	2.38506360620279e-22	2.42830449963473e-21	40.035611673231
C6orf123	-1.67207519508839	6.51931064314743	-11.5823375320975	2.39749356346024e-22	2.43969243770806e-21	40.0304430892847
IRX3	2.53040580914651	11.8442337578696	11.5807754783966	2.42024174734496e-22	2.46156294790938e-21	40.0210530427896
MYO7B	-1.29886106017857	6.5625916105083	-11.5759575142733	2.49177384672181e-22	2.53037697522801e-21	39.9920908409522
FLRT1	-1.447193103827	6.83493479057366	-11.5707818397533	2.57097324210267e-22	2.60675140051579e-21	39.9609787640553
AX746823	2.12153261891013	8.34867045584736	11.5701080352477	2.58146740696857e-22	2.61603824763066e-21	39.956928415216
BRINP3	-3.10487829399059	4.17491149602601	-11.5676823254553	2.61960242559015e-22	2.6519415257821e-21	39.9423471410604
LRRK1	1.48593490965244	6.69501349155034	11.5673102145997	2.62550206260172e-22	2.65654181336764e-21	39.9401103404728
SULT1C2	-1.63696150562272	10.6883276798632	-11.5608108250516	2.73071541044931e-22	2.75730506591428e-21	39.901042152396
SAMSN1	1.64692077473594	8.19710359926253	11.5541461553528	2.84298272273764e-22	2.86918735236534e-21	39.8609812123286
WIF1	-2.83161510340396	5.38721020162426	-11.5478624225292	2.95305571204942e-22	2.97874106538634e-21	39.8232107751033
SKIDA1	-1.5831640980068	6.38342742988047	-11.5462912256712	2.98123802923424e-22	3.00562161188076e-21	39.8137666906636
PTAFR	1.05352636807284	8.38088419214831	11.5402688627734	3.09177300622292e-22	3.10746969994682e-21	39.7775681345449
PEG3	-1.57452269175583	7.96062077861386	-11.5390105338845	3.11538092900945e-22	3.12959255908028e-21	39.7700047927586
PRTG	-1.21730557555822	6.46073298110642	-11.5362971808458	3.16690205109733e-22	3.17971891902954e-21	39.7536959464298
KIAA2022	-1.59213880106335	6.11408227432956	-11.5351233387829	3.18945406917472e-22	3.20072249368947e-21	39.7466405076838
MS4A4A	1.73459331266685	9.67349699282802	11.5346488307839	3.19861588244041e-22	3.20827393449077e-21	39.7437884598933
MST1L	-2.77646162222881	8.25440797014817	-11.5323871912128	3.2426465022288e-22	3.24911190169644e-21	39.7301948492299
PHLDA3	1.00555357427395	8.48549684713933	11.5195811771985	3.50363491271992e-22	3.49988484477052e-21	39.6532259620957
FHOD3	-1.00165144917304	9.29606548623527	-11.5156756589615	3.58733290250933e-22	3.58021441887728e-21	39.6297529721264
PXDN	1.37071181691568	9.58822362887238	11.5138799333943	3.62648444451401e-22	3.61707219481069e-21	39.6189603808914
KLHL14	-1.86240313213216	6.91159770640026	-11.5137027212884	3.63037121430329e-22	3.61910709202087e-21	39.6178953118405
MYO5B	-1.03717299633855	9.59589210081453	-11.5064606082182	3.7928250382118e-22	3.77529598394683e-21	39.5743697450122
GABRB2	-1.63754934215238	6.46704313222427	-11.5036646104138	3.85747114654397e-22	3.837694264016e-21	39.5575658945945
OTOGL	-3.09114921666983	7.12228165776825	-11.5035395710139	3.86038776591992e-22	3.83864737819708e-21	39.5568144157428
GAB3	1.19195201396241	6.58844880211652	11.50275595497	3.87871634351191e-22	3.85491691767191e-21	39.5521049401904
OR51E1	1.60132466723739	7.046922888871	11.4956803351044	4.04820239207479e-22	4.02059242759564e-21	39.5095815363367
NOTCH2NL	1.35944757362838	11.6715710866715	11.4956265961962	4.04951755297403e-22	4.02059242759564e-21	39.5092585775053
KCTD11	1.43679750354291	7.22035796185943	11.4874610663908	4.25439863438833e-22	4.21760034574491e-21	39.4601862536081
SAMD3	1.23847390465192	6.60729375636878	11.4855452404445	4.30395028713517e-22	4.26241140361608e-21	39.4486729275476
ITPR3	1.23902910277828	8.45134253028369	11.4826005424169	4.38124019918675e-22	4.33457479373353e-21	39.4309766522861
FOXM1	2.22641395489927	5.63547352209252	11.4806770061347	4.4324750948563e-22	4.38305143209327e-21	39.4194171854495
DTX1	-2.2010028025485	6.53577353409998	-11.4773762492388	4.52179279262983e-22	4.4668657733242e-21	39.3995815102722
SLC2A9	-1.35851307016753	8.92811690523266	-11.4772842530381	4.52430779042058e-22	4.46709865916639e-21	39.3990286686269
TNFRSF4	1.60978586158783	6.31523328454538	11.473963764673	4.6160256108192e-22	4.55306924743058e-21	39.3790746578289
HVCN1	1.02829579033568	8.5533006644767	11.4671771803076	4.80930486396235e-22	4.74132625899387e-21	39.3382923613186
FBLN5	-2.03319797922	10.3799487488137	-11.46384344595	4.90719031018158e-22	4.83296597433411e-21	39.3182594756085
RAC2	2.14715294518986	8.95634608378903	11.454917542512	5.17918901953414e-22	5.0957291964784e-21	39.2646236465627
DENND1C	1.1625327372307	8.20189410725449	11.4533845785701	5.22739659304832e-22	5.14057931897411e-21	39.2554122307545
FOXC1	-1.55241941858663	9.92665666311806	-11.4521818574139	5.26553269026131e-22	5.17548521546797e-21	39.248185245127
TNFSF8	1.21502906680244	6.61873248268615	11.4473673168277	5.42099804179e-22	5.31690107393434e-21	39.2192556595382
DLX5	2.34679754260096	4.80513429692297	11.4382179755293	5.72919278142897e-22	5.60871375240891e-21	39.1642805959248
RAB38	1.28918185523687	8.43967490873038	11.4377869011012	5.74413788909173e-22	5.62053711873733e-21	39.1616904738201
HOXA4	1.48527506037377	8.69467592917107	11.4342343298811	5.86879670695794e-22	5.73964803690962e-21	39.1403449193228
RP11-672L10.6	-1.14082161631424	7.82554603717296	-11.4333398111067	5.90060899628895e-22	5.76500676561651e-21	39.1349702669692
LCP1	1.4356003278949	9.75154510977373	11.4327504612763	5.92166251255708e-22	5.78269375105163e-21	39.1314292106659
ARHGAP22	1.47693420913878	5.63860339621085	11.4312687655302	5.97492582870686e-22	5.82889852249008e-21	39.1225266086972
IGF2BP2	-1.34449237828743	8.18785384279771	-11.4248299779566	6.21200199560114e-22	6.04267237551771e-21	39.0838404774479
UPK1B	-2.41411536057136	7.577718991123	-11.424815271	6.21255412861278e-22	6.04267237551771e-21	39.0837521148429
APELA	-3.38150315637086	4.94535352579447	-11.4167883612871	6.52134116684357e-22	6.33960418757559e-21	39.0355254587263
MT1X	-1.96187373414983	13.1392365007536	-11.416589305513	6.52919048370596e-22	6.34120933053286e-21	39.0343295268909
SLC16A7	-1.7157424328567	8.5755864338979	-11.4145124499999	6.61165196859131e-22	6.41493895705055e-21	39.0218517864998
AMPH	-1.69497623470795	6.80247046007846	-11.4135504060425	6.65020186252277e-22	6.44914924807441e-21	39.0160718652455
HSPA2	-2.06273561675637	10.2405971966877	-11.4121671013026	6.70602609859801e-22	6.49043977809493e-21	39.007761065566
GNG2	1.08206682592477	7.83068698821701	11.4090175488528	6.8348819048083e-22	6.60862607066294e-21	38.9888389449794
NAPSA	-2.18027480200312	10.0435057515877	-11.4077554471206	6.88720939946664e-22	6.65265731986923e-21	38.9812564623057
ANK1	1.14596033394037	6.04917034699945	11.4063560014191	6.94569951624247e-22	6.70254873554092e-21	38.9728488871875
HCP5	1.63389660856323	8.70409385925638	11.4061988175041	6.95229998485001e-22	6.70561650605686e-21	38.9719045623284
TNFSF15	-1.47522435512743	8.5696051984566	-11.4054506460641	6.98380324577423e-22	6.73268862832903e-21	38.9674097284951
TRAF2	1.95768212046246	5.52732527138822	11.4043570565286	7.03010789417603e-22	6.77066754879391e-21	38.960839730752
PABPC4L	1.93815183589353	7.95700466709432	11.4036249847909	7.06127652802221e-22	6.7971072474539e-21	38.9564416531692
GSTO2	-1.80152006585766	8.27715376415592	-11.3954542261217	7.4186694273303e-22	7.12737755422777e-21	38.9073549763229
PCK1	-3.61058590768584	13.0742368358648	-11.3875534281925	7.78143684465977e-22	7.46492318739534e-21	38.85989171165
PERP	1.04883943018914	10.1330190816013	11.3843801128636	7.9320831339203e-22	7.60199987000997e-21	38.8408287796003
PALM	-1.14391403951179	8.88981456939252	-11.3839531289609	7.95257452702626e-22	7.61791339956929e-21	38.8382637957331
LIPH	-1.60692786984159	6.38330837731953	-11.3837917291837	7.96033403868373e-22	7.62162124202064e-21	38.8372942338806
FBXO21	-1.07216376661832	11.1761609285715	-11.38213078404	8.04062714960275e-22	7.69098347999337e-21	38.8273166317043
RAB42	2.34929845728065	8.43012010143745	11.3796186140369	8.16361062019054e-22	7.80124418589648e-21	38.8122257008409
ACSBG2	-1.95095950680037	6.30883179825972	-11.367912404284	8.76194638228549e-22	8.34023249861162e-21	38.7419071494115
VAV1	2.8947222251181	6.94783517614818	11.3610591125422	9.13237527840513e-22	8.6759778517432e-21	38.7007414854367
APOL1	2.35899850754753	8.79174986835277	11.3608983172516	9.14125184536231e-22	8.68020324211511e-21	38.6997756515044
E2F8	2.92319965939924	5.24682323248222	11.3606567538756	9.15460335570468e-22	8.688671727286e-21	38.6983246768224
OGFRL1	1.00595930243849	9.85604530154548	11.3579395629706	9.30613516779847e-22	8.82821602873583e-21	38.6820037047318
ANO5	-2.76752879797722	7.05278901063545	-11.3481765127329	9.87158096441658e-22	9.35556650491299e-21	38.6233630006539
FA2H	-1.17662677511932	7.2920756342481	-11.3437082539518	1.01416988077343e-21	9.60227801607651e-21	38.5965257579341
SPARCL1	1.52784131405663	12.9476895081421	11.3408263093246	1.03198258074169e-21	9.75679044860412e-21	38.5792165233373
SYNM	1.05383595340998	9.74005812192047	11.339037045221	1.04319862032945e-21	9.85332518546352e-21	38.5684701484213
ANO1	1.70830299107266	7.49164177615204	11.3319090317638	1.08910320186489e-21	1.02720566185515e-20	38.5256599709628
RASSF3	1.02403789514993	9.90018118610659	11.3256760535026	1.1308950692555e-21	1.06508469304846e-20	38.4882264661511
RPL22L1	1.37688520497445	10.3084544162735	11.32095363299	1.16362252245869e-21	1.09538125925398e-20	38.4598656820228
FMNL1	1.42780281778069	6.93296242365715	11.3156270311583	1.20167434675084e-21	1.12939831434381e-20	38.4278772209308
CYS1	-1.88612523549602	11.5340696803587	-11.3033916547643	1.29385598730614e-21	1.21273474391263e-20	38.3544018266604
PRSS23	1.14467284139111	10.2769311609344	11.3030578876631	1.29646723602706e-21	1.21460140338883e-20	38.3523975635806
SPATA17	-1.35450304718296	7.49233131888115	-11.300605369843	1.31581688455467e-21	1.23155182045783e-20	38.33767035704
RP11-82L18.2	-1.64575580079794	7.16149234027329	-11.3002358614981	1.31875710853878e-21	1.23312598140513e-20	38.3354514995021
TFAP2A	-2.09729423437361	7.23243670686333	-11.2984963069091	1.33268741543824e-21	1.24496380625234e-20	38.3250057175879
CLEC1A	1.10974570957598	7.80395678868372	11.2974848827825	1.34085437798005e-21	1.25199642467989e-20	38.31893229881
ZNF684	-1.1244227495839	7.82133909085259	-11.2964753236563	1.34905615722472e-21	1.25905483930701e-20	38.312870109581
NAT8L	-1.61961541466783	6.73808036844187	-11.286384060598	1.43384500399198e-21	1.33564297686496e-20	38.2522758963209
MOGAT1	-2.11251595159741	7.11120895856476	-11.2857100043796	1.43969469376531e-21	1.33981843794427e-20	38.2482285541086
FAP	2.61763556005878	6.26356780716259	11.2843337476117	1.4517124797271e-21	1.34972072534021e-20	38.2399649213413
IL27RA	1.2864390055299	7.12345194724386	11.2833671903206	1.4602125528329e-21	1.35697988729123e-20	38.2341613336683
STRADB	-1.05398402272279	11.2010390785925	-11.2791927559881	1.49749820240537e-21	1.39031109753401e-20	38.2090967282776
CDKN1C	-1.53909811841052	10.5379053491504	-11.2790008155749	1.49923529058695e-21	1.39126479451769e-20	38.2079442710944
GBP1	1.63757498766522	10.4732328580466	11.2754780965355	1.53147641503311e-21	1.42051141780567e-20	38.1867932068277
CXCL10	2.58536012021632	9.43187807961657	11.2742324644162	1.54304191314069e-21	1.43056189477977e-20	38.1793142906204
PFN2	-1.01539058394034	12.0770566018204	-11.2711132552488	1.57238765046652e-21	1.45707922276564e-20	38.1605864178321
TRIM50	-1.8163574241195	5.10932249433665	-11.2692669828057	1.59001958111532e-21	1.47272182279202e-20	38.1495014579111
CDH4	1.68376190939359	6.06231718891019	11.2684101326412	1.59826950335519e-21	1.47826729571771e-20	38.1443569935939
RFTN1	1.10687114409569	9.988073323915	11.2675213824307	1.60687176114686e-21	1.48552262484516e-20	38.1390210281508
AGBL3	1.09139564196294	6.89838090060574	11.2627766976543	1.65358471518594e-21	1.52798712083589e-20	38.1105348468319
ITGAL	1.52408229664998	7.89008729076667	11.2609182019221	1.67224991602247e-21	1.54377890269074e-20	38.0993769875322
SLC7A11	1.64257433862931	5.91139961544068	11.2533086701917	1.75089521240033e-21	1.61410137666199e-20	38.053692755685
C1orf168	-2.50827896143233	7.32400835234654	-11.2452036533974	1.83873010288432e-21	1.69348079353524e-20	38.0050359017892
ARL11	2.04671942057192	5.14162461429814	11.2404596491723	1.89217018759123e-21	1.74106307542726e-20	37.9765572085218
VEGFC	1.02156802345905	8.474047538973	11.2375915191822	1.92522891584894e-21	1.7704213184333e-20	37.9593399185372
CORO1A	2.64855090030537	8.33489371243993	11.2256105537448	2.06968146664413e-21	1.89727254746297e-20	37.8874215227737
CCRL2	1.83535926379744	6.67165608042326	11.2227447207706	2.10580983550201e-21	1.92768645333974e-20	37.8702194371397
ANGPTL1	-2.11320617096771	6.8205750136768	-11.2219169000861	2.11636265005871e-21	1.93463580123604e-20	37.8652505171524
DIRC3	2.27670626381735	5.28308339498632	11.2090612163015	2.28719238977694e-21	2.08593223114184e-20	37.7880884061091
SLC19A2	-1.26638905836449	9.75765328450642	-11.2069154766978	2.31701827994524e-21	2.11215075668125e-20	37.7752098444758
RP11-247L20.4	-1.32969887288136	10.2843562535893	-11.2032896601032	2.36830313120985e-21	2.15689465932072e-20	37.753448337681
CTD-3080P12.3	-2.80837685066904	5.37285260486669	-11.2013626345731	2.39601967780053e-21	2.18112353298712e-20	37.7418828584403
PRSS22	-1.06232388907921	7.77416639252941	-11.1955094464112	2.48220962416033e-21	2.2564390734656e-20	37.7067544207145
PLEKHB1	-1.22145375224382	6.508940215344	-11.1932873456859	2.51573604957256e-21	2.28585585700383e-20	37.6934185967414
RORB	-1.99319728066399	5.86714593339854	-11.1902066413208	2.56296660901623e-21	2.3266133659152e-20	37.6749301946252
ITK	2.12049259344943	7.58113148194577	11.1893115912025	2.57685406771089e-21	2.33813717004934e-20	37.6695587435295
SLC9A9	1.45590558107775	7.67753283411308	11.18793506438	2.59835892018661e-21	2.35437986485148e-20	37.6612978687605
CDH9	-2.74284628186688	5.77950826382317	-11.1856410240347	2.63459683977865e-21	2.38611198996404e-20	37.6475309199773
SHISA2	-2.74914907217307	7.44210929741046	-11.1845156410695	2.65255819418166e-21	2.40126965578598e-20	37.6407773628235
MYO3B	-2.0818587866574	5.84395972690629	-11.1813022577126	2.70452076238871e-21	2.44604995025641e-20	37.6214937155729
SLAMF7	2.23008273029896	6.56312747310939	11.1776477678362	2.76485348309519e-21	2.4971596043863e-20	37.5995634194073
IL21R	1.68850398330895	6.17095592956249	11.1770360330787	2.77508332464351e-21	2.50524449929471e-20	37.5958924958646
ZNF320	1.39975451951202	9.84282150007806	11.1759367276327	2.79356178886619e-21	2.52076507826834e-20	37.5892957716273
RP1-78O14.1	-2.96185068095149	7.09081354880594	-11.1754481854477	2.80181320989634e-21	2.52588487124004e-20	37.5863641362965
PALM3	-1.97260197532742	8.87059196782078	-11.1606094820104	3.06438188229058e-21	2.75799626658945e-20	37.4973244422247
SLC16A9	-3.02302992174833	12.0968294246594	-11.1605809694851	3.0649093671268e-21	2.75799626658945e-20	37.4971533604773
MICALL2	1.13062059131592	7.25010340137541	11.1591122301837	3.09220425931308e-21	2.78128092144456e-20	37.4883406254888
HS3ST2	1.73474120694127	6.93562909329023	11.1589894919518	3.09449617940163e-21	2.78206562477488e-20	37.4876041747034
AC012065.7	-1.30589423639095	8.68902465868012	-11.1576449040628	3.11971540355541e-21	2.80345264531327e-20	37.479536449494
SPNS2	-1.10616915533095	9.67169197385727	-11.1551697323925	3.16667813429313e-21	2.84174563891992e-20	37.4646852304001
PDE1A	-1.95647305117575	8.64219036371646	-11.1480009727103	3.306718084675e-21	2.9633455757451e-20	37.4216734122473
CDS1	-1.03976456965643	9.21563763529329	-11.1460708537434	3.34546852290869e-21	2.99533291824977e-20	37.4100932264799
CD2	2.15595906391082	8.74728125780904	11.1437358328925	3.3929550019013e-21	3.03646233252346e-20	37.3960839276266
SPTBN2	-2.24851898388322	6.60570444660846	-11.1405954370373	3.45788372544028e-21	3.08892721672307e-20	37.3772429884597
GZMH	2.73488680447395	6.7326543027722	11.1331677337455	3.61643726501003e-21	3.22468398348188e-20	37.3326816562158
PBLD	-1.82918420201565	12.6065639013869	-11.1329519172714	3.62115114792452e-21	3.22741888804787e-20	37.3313869308702
CLDN14	-1.28108251753256	7.38268487968019	-11.130919209528	3.66585203825264e-21	3.26577427716879e-20	37.319192406174
SPI1	1.96185233877863	5.48475574254586	11.1228601137995	3.84857033232009e-21	3.42543732711814e-20	37.2708462246704
CENPE	2.28411690048246	5.44971190706506	11.1210411052111	3.89105421527054e-21	3.46167823718054e-20	37.2599344154358
MCM10	1.28909886704838	5.35330970223261	11.1112375515396	4.12821988025896e-21	3.66934156159616e-20	37.2011274041296
SASH3	1.33048957062334	8.13041249058491	11.109929070618	4.16094810680368e-21	3.69675530123506e-20	37.1932787143186
PGBD5	1.76245903242982	7.97675996758382	11.1061211372777	4.25767594302429e-21	3.77584573788837e-20	37.1704378895461
RP4-680D5.8	-2.09697839755534	8.48980210019547	-11.0990156925235	4.44421293108383e-21	3.93592992482205e-20	37.1278194051701
ARHGAP30	1.39044454066399	7.896519981208	11.0969650738354	4.49954985218663e-21	3.98313810085843e-20	37.1155201619831
KCNK5	-1.50281017281208	9.71128507346157	-11.0927355887587	4.61586814788841e-21	4.08241876491268e-20	37.0901530030957
SLC16A5	-1.51388628382329	8.47099498478839	-11.0896534676297	4.70251969593559e-21	4.15530583952397e-20	37.0716678375694
C1QTNF6	1.24447232585303	5.62285375245556	11.0885052231275	4.73521560884148e-21	4.18231143387491e-20	37.0647812859461
RARRES2	1.75303325171338	11.8955827178499	11.0830121538835	4.8947987070175e-21	4.31742393604123e-20	37.0318375598221
WLS	-1.31020166300441	10.651175001646	-11.0802944861946	4.97572713995418e-21	4.38485954208462e-20	37.0155392771133
PLEK	1.75265366098777	8.28575517590108	11.0785204888882	5.02927405397365e-21	4.43005582848672e-20	37.0049004983645
ABCA8	-2.11225114055461	7.76810952269014	-11.0769645115013	5.07671388130642e-21	4.46983447258421e-20	36.9955693060379
STMN3	1.18987231371865	8.7427551972299	11.0750452693562	5.13584543458515e-21	4.51986684653949e-20	36.9840597534302
CEL	-2.57752820921803	7.00966473558452	-11.0563148966541	5.75030291904366e-21	5.04703031394253e-20	36.8717431495475
C11orf54	-1.36488961811606	13.4073595254185	-11.0514256088542	5.92244589164165e-21	5.19114566325065e-20	36.8424269845744
BCL11A	1.56897287125464	6.83857868633728	11.0458373965235	6.12551004122713e-21	5.36433741277973e-20	36.8089213155553
IL7	1.357176784445	8.27917993806882	11.0299733068655	6.74067700542025e-21	5.88465606366288e-20	36.7138111142528
TMC8	1.51632304314349	7.19031449719297	11.0256240887452	6.91985540399577e-21	6.03570298455332e-20	36.6877380976819
MAP2	1.19149297230451	8.05759287341159	11.025043268817	6.94414131961975e-21	6.05419153573076e-20	36.6842562179525
UCHL1	-1.92999684384496	8.83571172878447	-11.0216558259012	7.08748694535814e-21	6.17641870351597e-20	36.6639495852084
EFNA3	1.80119903603323	6.28206679642511	11.0118407835192	7.51973615620754e-21	6.53856738799963e-20	36.6051144252749
PCED1B	1.84474710480716	7.64259137935114	11.0100670517755	7.60061420106606e-21	6.60303358717614e-20	36.5944824489024
SIGLEC1	1.50701025112619	7.91955867046075	11.0091343736102	7.64349015244187e-21	6.63440050919877e-20	36.5888919124161
SLFN12	1.0375324712521	7.65078367092844	11.0018269481905	7.98788841607346e-21	6.93026228714581e-20	36.545092059176
DUXAP10	2.52506542369976	5.73281979853964	10.9933252765776	8.40812570662392e-21	7.27874804435169e-20	36.4941370734031
ABTB2	-1.1171218221264	7.6354502359473	-10.9926779649031	8.44101273229612e-21	7.30399154703186e-20	36.4902575291584
CLMN	-1.0381055250649	9.51121383752634	-10.9844582366771	8.86996743221362e-21	7.65825954642972e-20	36.4409957601371
EDN1	1.71543310165874	9.68133318130077	10.9660175683499	9.91319876835282e-21	8.54392184085078e-20	36.3304901170644
BCAM	-1.08000485171386	8.45965895258092	-10.9649038991284	9.97998892018021e-21	8.5977056196313e-20	36.3238169677483
NCF2	1.48657239563817	8.4304728613562	10.9594558027081	1.0313262626515e-20	8.87701511713075e-20	36.2911726067985
ANK3	-1.6760055621232	10.8694643224623	-10.9586567401433	1.03630693267075e-20	8.91596996199038e-20	36.28638483502
SH2D1A	1.9156255673358	5.50819989626931	10.9452629707532	1.12346084578617e-20	9.644638246414e-20	36.2061374458734
AHCYL2	-1.11171293459351	9.11287700845737	-10.9410697532603	1.15222306444096e-20	9.8872240980641e-20	36.1810159882093
KIAA0226L	1.48408038998599	7.47005227165214	10.9234518250132	1.28132707832023e-20	1.09806425045904e-19	36.0754767950208
TMEM173	1.08687265437021	9.1937016216948	10.9211760282561	1.29902520209388e-20	1.11225840698287e-19	36.0618448771079
SLC17A4	2.69690043531084	7.03101103632216	10.9159319645527	1.34074162882314e-20	1.14697490979069e-19	36.0304341547748
CDCA8	1.9491480045029	4.94359777346674	10.9157243295864	1.34242062032792e-20	1.1479101979846e-19	36.0291904977569
CLU	1.41309852939452	12.3603902683358	10.9144681000845	1.35262370847936e-20	1.15613048680711e-19	36.0216661913089
PPP1R16B	-1.27616619996169	9.20017341154248	-10.9063360661702	1.42057170002263e-20	1.21014944709751e-19	35.9729605085789
ANKRD2	-2.69383106244552	6.00246884547527	-10.9022211784513	1.45624241999393e-20	1.23875413148702e-19	35.948316229687
NPFF	1.02469941543377	6.58959019710914	10.8973997538801	1.49917767214276e-20	1.27417099723877e-19	35.9194415544385
CSRNP3	-1.08738669471246	7.14487837699606	-10.8969919037685	1.50286710039052e-20	1.27675302559835e-19	35.9169990650184
LRRK2	1.15134509757139	10.9921697935485	10.8882265876208	1.58438738758593e-20	1.34309724953706e-19	35.86450832208
AMFR	-1.0844091280752	8.85409202518004	-10.8879971780943	1.58657925892599e-20	1.34437383898359e-19	35.8631345651822
JAK3	1.07794549878591	7.19181304643369	10.8797219467518	1.66770213241746e-20	1.41104293943797e-19	35.813582393149
RASSF6	1.1007780120728	9.47216721197639	10.8796784358242	1.66813944113361e-20	1.41104293943797e-19	35.8133218586086
CA4	-2.31487550563911	8.98107556856619	-10.8782090003292	1.68297551180737e-20	1.42297830267095e-19	35.8045232368596
BRIP1	1.21544073310245	6.1092903424597	10.8730591016242	1.73601913494382e-20	1.46656202697258e-19	35.7736877837949
SIGLEC7	1.09401446080687	6.52908236929512	10.8721057386344	1.74602032246303e-20	1.47322083573546e-19	35.7679795940324
BCL2A1	2.16513254643499	7.55646126897472	10.8716177659937	1.75116160859846e-20	1.47680793317217e-19	35.7650579126241
RASSF5	1.30142426313948	8.48758471796285	10.8653154099829	1.81893795132065e-20	1.53330601754553e-19	35.727324384006
C2orf88	-1.25567763755737	7.71808923526963	-10.8639289848139	1.83419581254158e-20	1.54550316981954e-19	35.719023845351
CASC10	-1.12243107427462	7.31431742736036	-10.8636971559748	1.83675957601374e-20	1.54699832102679e-19	35.7176358941022
C15orf59	-1.20679675287126	6.52954357510891	-10.8594229640518	1.88467376451873e-20	1.58530991891856e-19	35.6920469629202
IL1RL1	-1.50702907617846	7.73183355713594	-10.858395729434	1.8963740202997e-20	1.5944673712507e-19	35.6858972108541
RHOH	2.2911076079495	6.82214273657039	10.8581243169042	1.89947752029291e-20	1.59639193482937e-19	35.6842723530594
STK32A	-1.12407591539573	5.95250515334536	-10.8549304406415	1.9363815846633e-20	1.6260129682012e-19	35.6651519570501
CST7	2.13560885012548	7.93472859199239	10.8532912802992	1.95559865593486e-20	1.6393403788566e-19	35.6553392029313
SDC1	-1.58416360419281	11.1225606843283	-10.8499689987719	1.99513439301607e-20	1.67068129632615e-19	35.6354509645209
GPR34	1.47749786616798	9.6988909808214	10.849934998911	1.99554309643325e-20	1.67068129632615e-19	35.6352474335395
NPNT	-1.90516408830461	9.62132211562711	-10.8479662459846	2.01935211074143e-20	1.6891712342476e-19	35.623462131528
RAB15	-1.07252770202562	8.02684316350965	-10.8473772657094	2.02652989183582e-20	1.69445219070351e-19	35.6199364321188
TLR1	1.2871420834996	8.69092316856671	10.8420883456414	2.09213740822e-20	1.74856294514728e-19	35.5882772209796
NDUFAF3	-1.01293879030819	10.8344615313794	-10.8377979924348	2.14691306418795e-20	1.79052549553275e-19	35.5625964881517
AX747261	-1.49233510484545	6.10243887073229	-10.8336514168403	2.20121367653016e-20	1.83425114142494e-19	35.5377773105663
HSPB8	1.35174455700708	11.3918807922354	10.8290985469288	2.2624158092822e-20	1.88204955204252e-19	35.5105273497095
PTHLH	3.15621254588851	6.32077237700577	10.8285063708237	2.27050005478833e-20	1.8879732954517e-19	35.5069831242533
SIRPB2	2.0211740032036	6.65289231457362	10.8261021282057	2.3036196024385e-20	1.91470061866803e-19	35.4925937201697
TINAG	-1.8479258409506	10.2991147570643	-10.8204717092529	2.38308140429057e-20	1.97990726760029e-19	35.4588968749225
PRSS8	-1.80641666029077	9.01885275591494	-10.8202320906796	2.38652319543763e-20	1.98192661471958e-19	35.4574628480213
ANKRD37	1.11517772765912	9.34502484976559	10.8196574151997	2.39479786073485e-20	1.98795608947659e-19	35.4540236446385
RRAD	2.0016683134257	8.74779235220857	10.8087896117635	2.55678896956332e-20	2.11615316784086e-19	35.3889876185312
ROGDI	-1.00574998158407	9.22265773860972	-10.805814534407	2.60301162699289e-20	2.15350041694528e-19	35.3711850543784
ACO2	-1.09077766007167	11.56704539945	-10.8054508235341	2.60871941024132e-20	2.15731188697551e-19	35.3690086789519
GNRH1	1.17789729624482	6.72566571640329	10.8021618224955	2.66090520486064e-20	2.19952698026881e-19	35.3493282699508
NLRC4	1.49964308598218	6.05971443848176	10.8009852687516	2.67982539088806e-20	2.21331217176633e-19	35.3422882677806
STX11	1.18729388259003	6.55295085063211	10.7981427122278	2.72609283476184e-20	2.25057680996197e-19	35.3252799275682
GPR183	2.05589412480987	8.7092401279471	10.7949777627768	2.77854690609156e-20	2.29195037089598e-19	35.3063430958431
CTNNAL1	-1.06358657259188	10.6349727688336	-10.7943450027791	2.78915418989138e-20	2.299732139995e-19	35.3025571728543
CAMSAP3	-1.15382299263286	7.84329484761553	-10.7918710567053	2.83101578677481e-20	2.33326654352395e-19	35.2877553020517
LCK	1.74648591528784	7.96054129613914	10.7887012246501	2.88557068053985e-20	2.37423592644419e-19	35.2687903818394
TRPM6	-1.77344861113272	6.11191436764965	-10.7869756343365	2.9157092436363e-20	2.39601616209761e-19	35.2584665157402
SLC28A2	-2.12814555724186	5.81104247750654	-10.786509443338	2.92390537124061e-20	2.40174439945283e-19	35.2556774161407
HES4	2.14555243916525	7.99748896261381	10.7842744843236	2.96351897261434e-20	2.43326386025422e-19	35.2423064092385
FCRLB	-1.13468608627205	8.2416210245721	-10.7823685651072	2.99772360276554e-20	2.46031762523458e-19	35.2309041619378
ABCA12	2.77732523577238	5.05520415400593	10.7817739220069	3.00847585532441e-20	2.46810876050662e-19	35.2273467254063
PLXNC1	1.1524916535715	8.33205143732042	10.7806396231509	3.02909299947896e-20	2.48398299986561e-19	35.2205608688171
CD247	2.07697993530108	7.56989626670675	10.7642039763053	3.34415919392805e-20	2.73548314030867e-19	35.1222441788009
PNCK	3.24467132401328	6.95088437784757	10.7552912569466	3.52848694775371e-20	2.88025054931383e-19	35.0689355858982
CISH	-1.08722628851831	10.0432031301536	-10.7531867514117	3.57347138316886e-20	2.91454288966818e-19	35.0563488356165
RHOJ	1.04050824745609	7.70599524725133	10.747624293165	3.69514695477295e-20	3.00877379171563e-19	35.0230818151423
ALDH1L1	-1.38272057986889	10.2187668012532	-10.7401329829665	3.86557774559886e-20	3.14102231492504e-19	34.9782819343117
VMP1	1.37288161388789	10.2586409213777	10.7365018564681	3.95098981841091e-20	3.20245862080378e-19	34.9565681051196
RAB7B	1.38558437874216	6.21331181566566	10.7258798256984	4.21181568485476e-20	3.41104857882101e-19	34.8930537968289
TMEFF2	1.30984684553452	7.33229751301261	10.7225966896817	4.29586035340986e-20	3.47624141480099e-19	34.8734236991803
MDH1B	-1.05456333533537	7.83651682020224	-10.7214308261277	4.32610636161087e-20	3.49927191833312e-19	34.8664530772721
GPX8	1.42840874317507	9.09765773596737	10.7174505401764	4.43097816635919e-20	3.57819287525644e-19	34.8426558297593
KCNJ16	-1.09857019661352	12.6752702507777	-10.7164939159402	4.45655917169329e-20	3.59736833632689e-19	34.8369365291098
CD74	1.10908828704905	12.5924209994266	10.7157270597941	4.47717204866916e-20	3.61103271530316e-19	34.8323518215845
MALRD1	-2.68327485773271	4.5728254614287	-10.7110397861683	4.60525019770388e-20	3.71127872634862e-19	34.8043293817962
RP11-134G8.8	1.52586867283729	7.08251077930188	10.709782652193	4.64021882020977e-20	3.7363865512445e-19	34.7968139490736
ARRDC2	1.55392563776334	9.43775756118085	10.7032217891061	4.8270651378698e-20	3.88364735784525e-19	34.7575931930904
ITGAM	1.11441597602447	8.95569071101195	10.7018715095471	4.86644199450501e-20	3.91372165163331e-19	34.7495215680671
SLC7A7	-2.08810154944565	12.1626768555741	-10.695447940397	5.05820312707978e-20	4.06460529264602e-19	34.7111246632388
SIX4	-1.97127691997215	5.07821339919534	-10.6828712749791	5.45577002979707e-20	4.37689876438775e-19	34.6359550443249
HTR7P1	1.0741370967992	6.70681430545617	10.6749179338117	5.72313801511659e-20	4.58388974083653e-19	34.588423750883
NCF4	1.42363979488981	7.64376504938644	10.6739553085807	5.75637368435715e-20	4.60862613724329e-19	34.5826711162394
C3AR1	1.57805835290548	9.57016469443002	10.6706436952326	5.87218940635519e-20	4.69559527438415e-19	34.5628814109323
GJA4	1.34565727438184	8.82564326645836	10.662372468191	6.17171927202674e-20	4.9310854468998e-19	34.5134568463286
TUB	-1.16774987312374	7.88914672119	-10.6523700348236	6.55438949868653e-20	5.22405367160461e-19	34.4536933455811
MILR1	1.9064964199119	6.47900691198726	10.6495803448858	6.6652798856025e-20	5.30811948305256e-19	34.4370263882861
S100A14	-1.34146096973079	7.62836705822391	-10.6491195507185	6.68377589205439e-20	5.3206873967658e-19	34.4342734294809
PDZRN3	-1.61376366367749	8.23236679171278	-10.6468283922537	6.77650526448525e-20	5.3923153340904e-19	34.4205853858165
IL2RB	1.98292853957745	7.897925030893	10.6442813592542	6.88109891803035e-20	5.47110173202746e-19	34.4053690737536
GULP1	-1.37332661369772	9.68781531368495	-10.6426659222175	6.94827040001816e-20	5.52003046493539e-19	34.3957184579496
AMDHD1	-1.80400775363411	8.90110718363641	-10.6365538905822	7.20839244087554e-20	5.71741333260703e-19	34.3592067412166
PYHIN1	1.80189488847552	6.37785672943282	10.6322449452675	7.3975985230099e-20	5.86273891841775e-19	34.3334676722942
COL4A5	-1.59901942762753	8.39220865198706	-10.6307666117725	7.46364806532189e-20	5.91099381556791e-19	34.3246372710003
CHAC2	-1.03480293333655	7.62462458358449	-10.6307472181595	7.46451844151772e-20	5.91099381556791e-19	34.3245214297692
SLC39A5	-2.13729462402004	9.20314455778877	-10.6277905924551	7.59840270862788e-20	6.01215561915211e-19	34.3068613095706
TACC3	1.89644802306893	6.80301266766631	10.6268475777005	7.64160727395347e-20	6.04390076522252e-19	34.3012287416368
C7	-3.15864849125909	10.5799664011667	-10.6261867818923	7.67202793333689e-20	6.06551333059579e-19	34.2972818847726
ITGB2-AS1	1.81833154818695	7.4129621727851	10.6252695302966	7.71445538720756e-20	6.09659722314036e-19	34.2918032950414
ADRB1	-1.48841568411599	5.86145622392433	-10.6218708225375	7.87371467717579e-20	6.21744294754103e-19	34.2715038701506
ASF1B	1.33569074894437	6.94256702622463	10.6213362908535	7.89905916965152e-20	6.23494404615385e-19	34.2683113482924
RANBP3L	-2.9385524728232	4.88572309904864	-10.6208353742216	7.92288374362922e-20	6.25123182332484e-19	34.2653196115283
ESPN	-1.45402526706215	7.57881022892596	-10.6199555067076	7.96490576798041e-20	6.28185867793353e-19	34.26006462177
RAB17	-1.13447942777576	10.1052892505737	-10.6127136127284	8.3193359764076e-20	6.55085037370882e-19	34.2168145251169
EPCAM	-2.16801382240795	12.5330192976995	-10.6086236844214	8.526416472979e-20	6.71121431541829e-19	34.1923901719902
EYA2	-1.83294399463472	7.1975845048901	-10.6079576311527	8.56062385258113e-20	6.73543423872892e-19	34.188412721909
KSR2	-1.20918611904697	6.27966818398244	-10.6005599298629	8.94989402334589e-20	7.0276030834758e-19	34.1442381016614
NLRC3	1.29142303385239	8.01872237626419	10.5963070133036	9.18163287797228e-20	7.2066809281289e-19	34.1188439170797
SH3BGR	-1.14619861093172	7.74948938275077	-10.5927553715976	9.37974307602141e-20	7.35628589623624e-19	34.0976379883531
TCF19	1.31945796548529	7.60643086372808	10.5922128712022	9.41037710839457e-20	7.377359237897e-19	34.0943989351508
PDGFRA	-2.28418163323863	8.05428265906236	-10.591426527578	9.4549579300595e-20	7.40934508081712e-19	34.0897040269999
BTN3A1	1.23701274535831	9.64829007986736	10.5855125014833	9.79707214899282e-20	7.66588968348951e-19	34.05439535905
FAM171A1	-1.27200119977403	10.8701422083239	-10.5832329291947	9.93221615624405e-20	7.76471896474779e-19	34.0407862067912
SLC13A1	-3.38154890383653	10.4817836105499	-10.5803863956419	1.01035881379099e-19	7.89554321829731e-19	34.0237927703196
SNRK-AS1	-1.43424876013752	6.95363541852568	-10.5733878162518	1.05375838477078e-19	8.23141115309786e-19	33.9820145312527
MRAP2	-2.46467397693639	6.59336133366608	-10.5727629303864	1.05772276604456e-19	8.25908704848894e-19	33.9782844200481
YPEL4	1.92351963502097	5.79153007878644	10.5714177205279	1.06630760122236e-19	8.3194915112886e-19	33.9702545936551
SSTR5-AS1	-2.85783979791929	5.54137670844317	-10.5693234783763	1.07981123687037e-19	8.41814655187843e-19	33.9577538936007
HSPB2	1.47241260273908	7.93470716377291	10.5682678193359	1.08668268593481e-19	8.46498170176326e-19	33.9514526952099
HMX2	-1.67523584896888	6.50112825510197	-10.5640385239052	1.11465236205444e-19	8.67596173308378e-19	33.9262089302192
RBM11	-1.98650061053926	5.8849279945079	-10.5636583393624	1.11720157541948e-19	8.69235159850989e-19	33.9239397505971
TRAF3IP3	1.3379402201392	7.22665346220928	10.5622104674249	1.12696324596281e-19	8.76482248318455e-19	33.9152980358369
FBLN2	2.59682799268472	5.37886265017785	10.5492877072322	1.21794888510978e-19	9.44995257294794e-19	33.8381742370741
MTHFD2	1.15436649313729	8.98438095900194	10.5453219442816	1.2473145437241e-19	9.66631781037906e-19	33.8145086881225
GPR82	1.36742990778643	5.9343006022886	10.5312069948992	1.35768559897099e-19	1.05008997846221e-18	33.7302872993932
AOX1	-2.56821053959196	10.7605693016585	-10.5307257622405	1.36161572260442e-19	1.05271426222185e-18	33.7274161207115
FHL1	1.4798533520153	11.3781466598311	10.5272379721805	1.39044120817539e-19	1.07415282771105e-18	33.706607413812
COL1A1	2.04115858287922	10.5495320069826	10.5155164824078	1.49185353976595e-19	1.14932537444469e-18	33.6366815794664
PRAP1	-2.51760400058399	9.02381497291538	-10.5136538943912	1.50863465629095e-19	1.16179688128277e-18	33.6255710225127
MAP1B	1.15657529927823	9.77313417410307	10.5054107778445	1.58519279973814e-19	1.21979559018719e-18	33.5764028962979
PLEKHO1	2.08160321561773	8.07936506522675	10.5047361220784	1.59162775459608e-19	1.22426657622954e-18	33.5723789634318
QSOX1	1.15755702072488	8.30637351698737	10.5028449428484	1.60980539360879e-19	1.23679246998584e-18	33.5610993469784
PPARGC1A	-1.55025843074662	9.20802921212601	-10.5009844089013	1.62789066999128e-19	1.24970737333173e-18	33.5500027652224
ZNF582-AS1	-1.29464562409716	6.9778172448345	-10.4935551166776	1.70215131524904e-19	1.30365234965088e-18	33.5056955798175
CD4	1.33985832484291	7.95421093280732	10.4928515289166	1.70935704489856e-19	1.30865971574089e-18	33.5014996990284
SLCO1C1	1.11727852076248	5.53356948359588	10.4925292836169	1.71266744872031e-19	1.31068212914758e-18	33.4995779852999
PNPLA3	-1.75214804650218	7.78569997403374	-10.4848557648042	1.7934154722731e-19	1.37033722577312e-18	33.4538191381326
ALLC	-2.05922745589723	6.50064940147784	-10.4844882965502	1.79737626597899e-19	1.37229362824005e-18	33.4516279555002
CD37	2.03899106375078	6.94046515367788	10.4817714596916	1.82693214593385e-19	1.3937735744709e-18	33.4354279955662
CDH5	1.07304671367782	9.54860381846183	10.4790679571689	1.85682447209776e-19	1.41547657832143e-18	33.4193080925695
PTGS1	1.90367057046514	8.62903822873626	10.4785293160129	1.86283823493695e-19	1.41950880896304e-18	33.4160964563249
IL18RAP	1.60459896529125	6.59831988061693	10.4777666802554	1.87138609087612e-19	1.42510477243444e-18	33.4115492942505
MYOM3	-1.26692457005058	8.26910178342288	-10.4657839096282	2.01094967491788e-19	1.52702838739696e-18	33.3401086027616
ADAM28	1.02257555446758	7.81221164492862	10.4605405452778	2.07524200884082e-19	1.57341075943022e-18	33.3088513297724
MT2A	-1.52094482372056	13.7729778901405	-10.4596764237097	2.0860327508473e-19	1.58098050594959e-18	33.3037002411421
MEGF6	1.34362971682818	6.87966170352147	10.4582073431552	2.10450662337132e-19	1.5943651067435e-18	33.2949430802432
CRNDE	1.46098283199358	10.5189902977621	10.4577115967304	2.11077747364186e-19	1.5984979793627e-18	33.2919879823855
PARM1	-1.49582047179951	10.0587201935311	-10.4571825246757	2.11749044360794e-19	1.60234344418039e-18	33.2888342542081
IGFBP2	-2.02166015875967	9.20917807648103	-10.4551849143199	2.14302918998431e-19	1.62041778913976e-18	33.2769269566481
SLC25A25	-1.43886253810203	8.36048002618214	-10.4541391297695	2.15652154235784e-19	1.62999096446862e-18	33.2706933958973
UCN	1.8226345574263	5.97806866967629	10.4411147802635	2.33183312120674e-19	1.75640266497044e-18	33.1930667578094
CMKLR1	1.00826514621182	7.07548956930262	10.4400311224746	2.34704507883336e-19	1.76650293779013e-18	33.1866086188118
HSPA12A	-1.01299325981785	9.48787343323496	-10.4331208192214	2.4464060007203e-19	1.83889119878884e-18	33.145428288267
CCDC85A	1.36830515986308	6.56954351000501	10.4330819912884	2.44697599185739e-19	1.83889119878884e-18	33.1451969127596
MSRB1	-1.25057725743769	11.6670072244518	-10.4320372507706	2.46236256642732e-19	1.84903616626088e-18	33.1389713518493
MAFB	1.16290772784517	11.1104326461756	10.4307635971612	2.48125116644627e-19	1.86250638112526e-18	33.1313818229488
TGM2	1.230524443858	8.80343415083921	10.4303549452181	2.48734216538676e-19	1.86636367149368e-18	33.1289467482227
CLDN11	-1.65679412455782	6.79073047622709	-10.4281880105893	2.51989078819167e-19	1.89006274618326e-18	33.1160346377151
STK33	-2.13150897531506	6.72349805716844	-10.4242493172888	2.58014461259619e-19	1.93451623038534e-18	33.0925660879794
FSCN1	1.05409478521688	8.18663714386324	10.4231682378464	2.5969329360523e-19	1.94635902920417e-18	33.0861247302723
MYADM	1.4335451884849	10.8163436481871	10.4211520190223	2.62853505172247e-19	1.96778680208971e-18	33.0741118085747
GPM6B	-1.6050747482185	7.66011118030598	-10.4194928583787	2.65482831279745e-19	1.98595343902737e-18	33.0642265295903
CD48	1.34155194840368	8.20719594821735	10.4165450333799	2.70219259327805e-19	2.02061322532074e-18	33.046663921043
PANK1	-1.41013630581689	10.7114112344508	-10.4062711687482	2.87395724420624e-19	2.14741471708723e-18	32.9854594398615
SHMT2	1.06128854626423	10.8200808805485	10.4030213389448	2.93052619782195e-19	2.18718137666079e-18	32.9661009702153
BCAT1	1.44408805791564	8.07199652174944	10.3962546385547	3.05190319504006e-19	2.27430611101103e-18	32.9257960254167
HLA-DQB1	2.3532611682003	9.98298652525951	10.3940241575368	3.09300160569623e-19	2.30318155281309e-18	32.91251126388
TRIM71	-1.68229801554385	7.38329648084209	-10.3886351706794	3.19459172709307e-19	2.37612156581772e-18	32.8804160609141
LY96	1.86958515222958	9.29429741777755	10.3849597834519	3.26578137348582e-19	2.42539026672788e-18	32.8585278844578
SLC6A1	1.71482275650273	7.10384726024211	10.3813733684209	3.33677351131199e-19	2.47623718471047e-18	32.8371706159444
HOXA7	-1.12353397849657	8.8210678026891	-10.3730398421143	3.50773704897899e-19	2.60114031112142e-18	32.7875480931514
GCM1	-2.56372638592871	5.55735039892015	-10.3723179678154	3.52295153058146e-19	2.61044714736734e-18	32.7832499108451
ANO4	1.68563033920048	6.09457092021132	10.3712957128772	3.54460967029646e-19	2.62550283175133e-18	32.7771632752881
WT1	-3.2243152091465	7.74630889190339	-10.3710668489939	3.54947670028608e-19	2.62811461461681e-18	32.7758006023433
TRNP1	-1.48542257892762	7.40257039427808	-10.3661952330555	3.65467326440919e-19	2.70294118147757e-18	32.7467956430084
SPRY1	1.2190448279669	9.91659262114282	10.3652270336811	3.67594805383629e-19	2.71765016624434e-18	32.7410313421489
C1orf112	1.3014888192348	6.3389118673862	10.3565278764319	3.87272962323075e-19	2.86097353508102e-18	32.689243221282
EMB	1.35785879109284	8.2201095731624	10.3452966291855	4.14241406352972e-19	3.05559552996308e-18	32.622390187384
FBN1	1.38531947677796	8.8531258739008	10.3437949564878	4.17986479901759e-19	3.08090147408596e-18	32.6134524008059
IDH1	-1.02872407654821	11.8915975656809	-10.3429269719607	4.20166565573533e-19	3.09580621002845e-18	32.6082863401537
ARG2	-1.95656934321711	10.3485316066528	-10.3381799113278	4.32291865357111e-19	3.18275291853269e-18	32.5800339459699
SERPINC1	-2.2705602128667	5.26341769179266	-10.3290455758495	4.56614465401883e-19	3.35930439467399e-18	32.5256757349309
EPB41L3	-1.00712909691982	10.4221283585811	-10.3284291235907	4.58304283352932e-19	3.37047116301468e-18	32.5220074941274
SNX20	1.31056540684696	6.96250982441521	10.3199677686841	4.82139150485738e-19	3.54309906650543e-18	32.4716608620946
REEP2	-1.87612845330673	5.51231914598662	-10.3157773393432	4.94397215892023e-19	3.63181822873604e-18	32.4467292677841
SLC27A2	-2.50468768495719	11.8223435616152	-10.3130863366856	5.02432555112795e-19	3.68808076691224e-18	32.4307195243557
BUB1	1.38490551793677	5.02878583241591	10.3103813014843	5.1064113009269e-19	3.74552975624499e-18	32.4146269161947
CD300C	1.69495109512345	6.31754995448068	10.3050486710953	5.27217266120692e-19	3.85989211755676e-18	32.3829042257782
ACSS3	-1.30675357199258	9.88531504101032	-10.3009042419427	5.40469840336789e-19	3.9554400301571e-18	32.3582515706771
S1PR1	1.07007773066893	9.21564384841571	10.2972824453847	5.52323069206558e-19	4.03917157961915e-18	32.3367089399223
ACSL5	1.08208464133795	8.89085695330161	10.2924868108305	5.68418007597201e-19	4.15377499287753e-18	32.3081859956116
DLGAP2	-2.00059706229622	5.21135588783488	-10.2911745626194	5.729031059456e-19	4.18187261580179e-18	32.3003814962252
SNX10	1.00464234922187	11.7291490110358	10.2883765825073	5.82584510251361e-19	4.24937618772476e-18	32.2837412124601
SERPINA4	-1.90992523451429	6.94363169150713	-10.2876002208582	5.85299645178075e-19	4.26759216735309e-18	32.2791241165341
STAC	-1.14020493766808	7.89581319929611	-10.2854365948772	5.92933205813055e-19	4.32003639432344e-18	32.2662571041267
PALD1	1.23642472138041	7.33308595974045	10.2826815612798	6.02797275505671e-19	4.38864182861651e-18	32.249873597393
GPR20	1.99253503439383	6.12219834110331	10.2795970009335	6.14035580554779e-19	4.46548547060969e-18	32.2315312583224
IL12RB1	1.06543495583394	6.83295100993331	10.2783923695906	6.18481091344644e-19	4.49614647969721e-18	32.2243681423963
BARX2	1.93467100452354	5.97023699229278	10.2715100525921	6.44502090621507e-19	4.68357303451647e-18	32.1834461534387
NUDT1	1.97797126260197	6.48595315459107	10.2695612648246	6.52066634244589e-19	4.73678797796876e-18	32.1718594895922
THRSP	-1.2788003673186	6.54243417709205	-10.2653204640994	6.68835540849759e-19	4.84782091905119e-18	32.1466466418728
NAT2	-2.50292918878453	5.34487428955876	-10.2651809983237	6.69394261993435e-19	4.85007694669476e-18	32.1458175023281
ZNF667-AS1	-1.58664545854049	9.34616982110119	-10.264333315496	6.72800239808104e-19	4.87295339985183e-18	32.1407779704525
DOPEY2	1.0135499404196	7.61152097367615	10.2636606772241	6.75515190573926e-19	4.89080983378588e-18	32.1367791353141
RP11-503C24.6	-1.92407058680855	7.71184442689996	-10.2618138252961	6.83025927352318e-19	4.93971407755648e-18	32.125799803782
EPB41L4A-AS1	1.10750216089821	10.5695929390177	10.2615323360708	6.84177976055461e-19	4.9462206391409e-18	32.1241264076998
SLC29A4	1.37739934222936	6.82541575923995	10.2576003133444	7.00474701479334e-19	5.06030360276206e-18	32.1007520648084
CDT1	1.36902344426254	5.78116400675022	10.2561907061186	7.0641081450917e-19	5.10130639409183e-18	32.0923728317853
ASPDH	-2.24932109850527	6.08983594870983	-10.2497903579874	7.34001480084757e-19	5.28885845889013e-18	32.0543289810397
SVOPL	-2.16979023103995	5.08142680383206	-10.2496564098134	7.34590247098601e-19	5.29115555049081e-18	32.0535328281439
CCL20	3.93279076638527	7.39654767597953	10.2401488790572	7.77606842062861e-19	5.59277669636331e-18	31.9970266371837
PPP1R1A	-3.30335573104732	8.8420906616582	-10.2385136587131	7.85254655878874e-19	5.64571019830156e-18	31.9873088317155
PDZK1IP1	-1.31042970649863	13.9434457602221	-10.23349107584	8.09217339979788e-19	5.81372824276535e-18	31.9574620703752
SORCS1	-1.79770208908268	6.5439684813239	-10.2296179022651	8.28193253024737e-19	5.94569947473693e-18	31.9344472369396
KIF21B	2.04031702791345	5.11283290704861	10.2265513266874	8.43531760184816e-19	6.04916903324633e-18	31.9162262589351
DUSP26	-1.38818372602205	7.35330865581326	-10.2223907972405	8.6479612643291e-19	6.19077778939832e-18	31.8915065850614
RTP4	1.77537957124703	8.86912268467782	10.2202087325999	8.76161549081908e-19	6.26711321184537e-18	31.8785425335273
ANXA2R	1.4708482543375	7.22464045252963	10.2137602318785	9.10627317769586e-19	6.50652016076053e-18	31.8402333207369
GRTP1	-1.14357164301104	8.64251936093512	-10.206294237108	9.52224255841866e-19	6.79630123461206e-18	31.7958841228214
ADAMTSL4	1.12367150899465	6.62147521272662	10.2003560032686	9.86658449480985e-19	7.02926897541906e-18	31.760613714491
KCNS3	1.26736396052874	8.69117930057929	10.2001439173244	9.87910991123961e-19	7.03563499819713e-18	31.7593540803809
SAMD9	1.02802147569322	8.36139121547486	10.1995496147414	9.91429292890265e-19	7.05556380223541e-18	31.7558243833503
HLA-J	1.18018352589928	12.5100480748844	10.1971411535123	1.00581594676136e-18	7.14756589578533e-18	31.7415203222113
PXMP2	-1.12532586291868	10.7047459972122	-10.1952513458424	1.0172501553093e-18	7.22350200083806e-18	31.7302969643222
XYLB	-1.0090806408987	6.24582955530438	-10.1877708848765	1.06379719636371e-18	7.54318424440389e-18	31.6858745782706
GAL3ST1	2.15434070185371	10.0590230070644	10.1812952753961	1.10580377276513e-18	7.81277871031861e-18	31.6474236520784
CES4A	2.6598817867534	7.35216174848024	10.1782717613679	1.12597971251732e-18	7.94959523977918e-18	31.6294719440812
MYO1F	1.34883143701322	8.90663933895173	10.1701458099322	1.18204261591812e-18	8.33639914695188e-18	31.581229437748
RMST	-1.89165990692149	6.33816011681939	-10.1633163724601	1.23130835947661e-18	8.67760249456383e-18	31.5406889295107
FCGR2B	1.95566046874993	8.16913163264424	10.1631143278628	1.23279663815063e-18	8.68496812045804e-18	31.5394896311135
HRSP12	-1.39477774371785	11.9989916156711	-10.1586212641705	1.26636059112336e-18	8.90861494092849e-18	31.5128206542379
TNFSF9	1.89395558415171	6.59503286107187	10.1560161374975	1.28623723760077e-18	9.04519684956491e-18	31.4973585696784
TRIM2	-1.18982712017943	8.99826800697201	-10.1542059907089	1.30023128801851e-18	9.13705020217814e-18	31.4866152704776
HNF4A	-1.43083172050403	9.03522075213506	-10.1505564300209	1.32890913338407e-18	9.32520232910651e-18	31.4649559171784
RARS	1.04936386754653	11.0820444642518	10.1437056639682	1.38445640668686e-18	9.70803617697882e-18	31.4243015295935
GAL3ST4	1.3661215018293	8.42186034479606	10.1417429216786	1.40079333176064e-18	9.81556972083549e-18	31.4126548869692
SAMD12	-1.19448688579798	8.42986774453106	-10.1403173731346	1.41277933978099e-18	9.88895081441697e-18	31.4041961093966
KIF4A	1.68956974205034	6.27900412790509	10.1381620266847	1.43109603944894e-18	1.00114937062303e-17	31.3914072999424
SEMA6A	1.21678962104425	9.16822958985104	10.1362490693755	1.44755117755882e-18	1.01214967994917e-17	31.3800570869403
ZNF792	1.01795464949595	6.66604852505249	10.1354812255866	1.45420908232035e-18	1.01644236106978e-17	31.3755013128596
TNFAIP8L2	1.27977703112058	7.67973560702116	10.1347714890347	1.46039030773356e-18	1.02039891769234e-17	31.371290351323
AMN	-1.30261170332873	8.77207618859938	-10.1327837702965	1.47784155245037e-18	1.03222439723717e-17	31.3594972092424
ELOVL2	1.51321516689928	5.72408160156499	10.1315510233002	1.48876884731085e-18	1.03911611960276e-17	31.3521835083363
RAB37	1.46273973110562	6.842499530704	10.1287471644336	1.51392383021921e-18	1.05592146435823e-17	31.3355491850102
CHP2	-2.24044876394873	4.66412572228172	-10.1266482993746	1.53303099162881e-18	1.06810787077615e-17	31.3230978427615
C3orf67	2.12512625081802	5.47825536827585	10.1234090275222	1.56299309124218e-18	1.08820964814407e-17	31.3038819688965
TUBA1A	1.23898731275897	13.195629733597	10.1145153459745	1.64829391776661e-18	1.14637730639843e-17	31.2511284790512
CRIP1	1.87186982648763	9.36597541047681	10.1110664005662	1.6826091929487e-18	1.16941338909935e-17	31.2306728934326
SLC16A2	-1.11316494310105	9.25035196677676	-10.1103206866222	1.69012185906406e-18	1.17421830258052e-17	31.2262502405418
PPP1R13L	1.06906076713665	8.83755504156863	10.1040349418339	1.75479171002836e-18	1.217852787707e-17	31.1889731402765
SLCO2B1	1.1733397192112	9.16420070820778	10.1023806794982	1.77221777128018e-18	1.22951136634762e-17	31.1791633159099
KRT7	-1.14970487376825	7.55272288267348	-10.089106170529	1.91844840138565e-18	1.32626702711666e-17	31.1004548547932
TEX11	2.51293786429739	5.96794568897413	10.0853697289522	1.96173753776945e-18	1.35571558542819e-17	31.0783035414353
MST1	-1.23535303370091	10.9178999155877	-10.0718471276528	2.12670999649564e-18	1.46713795217593e-17	30.9981470813617
CLEC5A	2.13690851642143	6.55197403318495	10.0702657037189	2.14688513416017e-18	1.47949373222241e-17	30.9887742408716
NMB	1.39434330039546	9.4952203295203	10.0692318681567	2.16017744616912e-18	1.48813067723967e-17	30.9826470026628
CD52	1.93296335282459	8.70646337537323	10.0658556179741	2.20416124856653e-18	1.51736411347578e-17	30.9626377129379
LAIR2	1.95835924274005	5.886395251013	10.0637035332008	2.2326623291943e-18	1.5359055454503e-17	30.9498840177907
OIP5	1.49316794076354	6.17575190636291	10.0633965319577	2.23675793989265e-18	1.53764359396549e-17	30.9480647035989
FAM101B	1.06302196132201	10.5293594337169	10.055235222571	2.34842614359495e-18	1.61101869052563e-17	30.8997036158869
CD180	2.02858002013674	6.425756200416	10.0524100742153	2.38836324628558e-18	1.63784224156582e-17	30.8829643389019
TNFRSF11A	1.26780584190728	6.63331879850649	10.0485756423723	2.44365359651007e-18	1.67458625307695e-17	30.8602462571255
BC032415	1.10199608576837	6.60707025416747	10.0467561626555	2.47033425676304e-18	1.6922782627857e-17	30.8494668032386
NOD2	1.92279408929592	6.57749610345865	10.0459515123073	2.48222603266869e-18	1.69949329961528e-17	30.844699783621
FSTL3	1.40005334307716	9.05335248437503	10.0450928919361	2.49497839386305e-18	1.70737016554895e-17	30.8396131002602
MAGI2-IT1	-1.8595538757106	6.65628326361742	-10.0432944389527	2.52190145356867e-18	1.72519185300148e-17	30.828958855698
ILDR2	-1.21463275498576	7.70115404085131	-10.0376303891912	2.60860079597436e-18	1.78325660970706e-17	30.7954065278932
GYPA	-1.4193935166535	5.26588226144313	-10.0370637556358	2.6174361336486e-18	1.78867262145673e-17	30.7920501219229
HRASLS2	-1.31905100656018	6.56192905389538	-10.031023523017	2.71349461986561e-18	1.85302373013052e-17	30.756273364201
PCDHB6	1.60682069306046	6.49631093909892	10.0305066173837	2.72187654049324e-18	1.85810025486336e-17	30.7532118671232
ETV7	1.14793557869456	6.79583548159743	10.0274750970066	2.77155677711981e-18	1.89069757308636e-17	30.735257518067
THSD7A	-1.13564880348335	9.90203047628397	-10.0087710070063	3.09871684229297e-18	2.10727798029493e-17	30.6245025529331
HK3	1.92545593396363	5.16159249594373	10.0066230602997	3.13867109929515e-18	2.13296861564097e-17	30.6117859675897
HMOX1	1.43496458665655	11.105899639294	10.0034990369884	3.19770025105921e-18	2.17082532803981e-17	30.5932915337292
FAIM3	1.87373635306721	6.89876819921631	10.0023278989188	3.22011338268708e-18	2.18528400925499e-17	30.5863585789575
RPL36	1.38773938069284	12.8579357174867	10.0006314754611	3.25285749507849e-18	2.20597764865202e-17	30.5763162717546
KLRG2	-1.80687078267204	5.75546122212376	-9.98753111066853	3.5171586095163e-18	2.3802759526212e-17	30.4987763272649
RNF43	-1.47845991586598	7.10542516480024	-9.98367288520961	3.59900525160581e-18	2.43482581726691e-17	30.4759432761921
BUB1B	1.54801258562954	6.80773725322763	9.98234591228478	3.62759179372628e-18	2.45247228579653e-17	30.4680905903271
CPE	1.82621371111147	10.9839160324961	9.98011758697016	3.67610615354804e-18	2.48355754923778e-17	30.4549043527507
BCL11B	1.35739887377281	7.05011251856935	9.97342781982842	3.82567502357326e-18	2.58104663638596e-17	30.4153204638754
CLEC12A	1.54618748772049	5.5834626921668	9.96025006796956	4.13828221504772e-18	2.78619694719067e-17	30.3373606507861
MAP3K8	1.2771711231298	8.2068787113314	9.95501043932355	4.26954275657339e-18	2.87062670621207e-17	30.306368102954
AFF3	1.27575655611993	6.3650281679456	9.94905583140377	4.42376147448525e-18	2.97125774977507e-17	30.2711500346692
DNASE1L3	-1.4509676075486	8.56325110374174	-9.9477569292145	4.45813293942938e-18	2.99331783075973e-17	30.2634682884544
EDNRA	1.32234239435581	8.64604420259785	9.94391152332383	4.56145889386463e-18	3.05954937922152e-17	30.2407275176212
PLAG1	-1.03572720251207	6.83400657164643	-9.94025517966085	4.6619185519254e-18	3.1247928077697e-17	30.2191063056036
DPYSL2	1.07914998181779	12.744125102006	9.93960619572255	4.67997883633377e-18	3.13582581925831e-17	30.2152687936006
LL22NC03-N14H11.1	2.07448450623786	6.97310310660165	9.93687621174946	4.75671748959148e-18	3.1861553683699e-17	30.1991266073403
TMEM252	-2.25935161367272	8.54583897865482	-9.93035975746704	4.94500224767379e-18	3.30750544348182e-17	30.1605986063788
RUNX2	1.17900704324564	6.98306228173042	9.93031492602675	4.94632300364571e-18	3.30750544348182e-17	30.1603335602821
CA8	-1.27566610580835	5.63580233449183	-9.92883187749543	4.99021317949217e-18	3.33571582895181e-17	30.1515658149655
FRMD7	-2.10674562974672	5.25221256137374	-9.92836969323154	5.00397052927202e-18	3.34377151050809e-17	30.1488334426662
MS4A14	1.58674122250692	7.3558256501301	9.92688881446765	5.04830550500642e-18	3.37224742987801e-17	30.1400788411423
AOAH	1.35092295089806	7.98603908878325	9.92268687722246	5.17624822410316e-18	3.45535725286777e-17	30.1152393051559
TRPM3	-1.64124003606493	7.95990076513778	-9.91668947570009	5.36448046871057e-18	3.5797906947994e-17	30.0797893467069
MAL2	-1.89339688614663	11.0473454254591	-9.91612836910973	5.38243652132089e-18	3.59055048949517e-17	30.0764729127794
ENDOG	-1.22453281485541	9.21182430910547	-9.9141784784164	5.44530251846801e-18	3.6300164646073e-17	30.0649483081712
CA2	-1.06977507728401	12.739693359557	-9.91378109165415	5.45820410931012e-18	3.63516628329816e-17	30.0625996510892
C14orf80	1.76477099773339	4.58406604130703	9.8949202168874	6.10690918215351e-18	4.05726484952633e-17	29.951147274694
SNAP25	1.20902044414156	7.35040211380427	9.8946064973164	6.11832529183084e-18	4.06347195508616e-17	29.9492937839727
B4GALNT3	-1.02737110917529	5.65901173890271	-9.89347807909277	6.15956410604227e-18	4.08947482772095e-17	29.9426270526749
TNNI1	-1.83318086779375	3.64096242389011	-9.89295433544694	6.17879872976867e-18	4.09946771512309e-17	29.9395328068413
THOC6	1.39014388635623	7.29663379132339	9.89130403963198	6.23979880460404e-18	4.13853863862723e-17	29.9297831601953
SIRT4	-1.02451354314239	6.841335315245	-9.88869739054077	6.33737418758778e-18	4.19899245106602e-17	29.914384176257
ERMP1	-1.06710687227508	10.4288329751408	-9.88861083995111	6.3406400238787e-18	4.19973652679955e-17	29.913872884968
BHMT	-2.11674038511124	13.6111352655091	-9.88421948101079	6.50856159699736e-18	4.30368754182022e-17	29.8879323599735
ZNF831	1.68496585636438	5.18480799476117	9.8829412357636	6.55826852294374e-18	4.33509290998901e-17	29.8803819503933
DLG3-AS1	-1.20375723493656	6.76266446721339	-9.87959213957907	6.69030664691879e-18	4.41790161633967e-17	29.8606001994655
ANPEP	-1.69438396313681	11.3568627866062	-9.87807738486204	6.7508931341889e-18	4.45640803425289e-17	29.85165357519
C19orf33	1.60201954045929	9.31658578645019	9.85848337444343	7.58571851385826e-18	4.99739486228934e-17	29.7359486063009
ENAM	-1.76601998319926	6.48647546913827	-9.85472501959043	7.75723902807513e-18	5.10867364621117e-17	29.7137600847379
H2BFS	1.23092094904932	9.35848813654938	9.85359599878334	7.80951555643679e-18	5.14137371147479e-17	29.7070949045203
PCDHGA8	1.44857867359506	8.02138138289724	9.849055064827	8.02334349239621e-18	5.28037303920327e-17	29.6802889575394
COBL	-1.50430777344102	8.74266324002802	-9.84760941985935	8.09263478641387e-18	5.32061553770297e-17	29.6717555544854
GBP4	1.2429201834216	8.26580932629665	9.84069727100465	8.43227685794597e-18	5.54020094330818e-17	29.6309576180802
GMNC	-2.39071145442914	4.72519684541408	-9.83659948169209	8.64030140919932e-18	5.66927577230993e-17	29.6067736333026
PKHD1	-1.38001820820427	9.21323882279015	-9.83552278697097	8.6958035436279e-18	5.70378358940974e-17	29.6004196110353
SMIM24	-2.69874989834787	12.1220222839295	-9.83534638225301	8.70493079203719e-18	5.7078601068296e-17	29.5993785864399
CASC5	-1.19653782608776	6.73751381137075	-9.82748421857078	9.1215694781282e-18	5.97705249755382e-17	29.5529849448494
ENTPD3	-1.50798260386278	5.53266670521793	-9.82702445021185	9.14654014506506e-18	5.99141177483723e-17	29.5502721323726
SYT6	-1.13672271786781	7.86094366129315	-9.80955611216112	1.01474871830551e-17	6.63820431577759e-17	29.4472204706412
IL17RD	-1.43876509365134	9.00498978032832	-9.79538012902485	1.10394892346998e-17	7.20489342360576e-17	29.3636179643214
CDHR2	-1.69767129755303	8.66177891066315	-9.79245809535553	1.12328516042902e-17	7.32865041919055e-17	29.3463883078017
CSMD1	-1.1985668141069	5.70006982682843	-9.79191932245209	1.12688712123432e-17	7.34970405626339e-17	29.3432115655819
NAP1L2	-1.93745937225368	8.20203899535444	-9.78075110604561	1.20420030536185e-17	7.83830016100528e-17	29.2773687234301
UGT2B28	-1.78363548672686	12.3826547991934	-9.77928690461517	1.21472087055084e-17	7.90415482799664e-17	29.2687375493359
GZMK	2.57335222285485	8.43899378878806	9.773340102408	1.25839987709276e-17	8.17751299441012e-17	29.2336849889138
GPR113	-1.25078006346858	5.99695634732398	-9.76989057767332	1.28445035022525e-17	8.34126653878883e-17	29.2133542182074
FCGR3B	1.4690279293621	8.86600397696515	9.76700677701267	1.30664059728719e-17	8.47694441119885e-17	29.1963588077252
CXCR6	1.16303280252217	7.06717287652713	9.76486434393213	1.32337320780453e-17	8.58265767695598e-17	29.1837332287491
TMEM74B	1.00885523120923	7.9380272255306	9.75559260796521	1.39828360150393e-17	9.0594910102068e-17	29.1291003460152
CTB-167B5.2	1.71865849730764	6.77469647807839	9.7463324881375	1.47731812633753e-17	9.55576170233967e-17	29.0745463505616
TNFRSF9	1.76245863887987	5.84917168580158	9.73940127310453	1.53937544868235e-17	9.94535031888444e-17	29.0337194553735
MRGPRF	-1.96448354445673	7.80480332692852	-9.73937908880298	1.53957818600415e-17	9.94535031888444e-17	29.0335887927719
C9orf135	-1.70359929250006	5.55686473821743	-9.73291208582913	1.5998278940703e-17	1.03243420796456e-16	28.9955015806949
APOBR	1.98711267230784	5.42286591680752	9.72894521658814	1.6379421912162e-17	1.05633527494723e-16	28.9721413778276
GPNMB	1.69402580862432	10.9565897472485	9.72751996381234	1.65185612921604e-17	1.0649581669903e-16	28.9637487866507
TRPA1	1.97516318352344	5.46139910516057	9.72538989660991	1.67287067678484e-17	1.07815167360428e-16	28.9512063687891
VEPH1	-1.12937950969334	8.44711647689887	-9.72488146045156	1.67792600838259e-17	1.08105430106149e-16	28.9482126407327
COL15A1	1.64543578362831	10.6691723129216	9.72106439994258	1.71636811878732e-17	1.10545838843617e-16	28.9257383912121
GYLTL1B	-1.14022440572055	7.99838979798342	-9.72067259409278	1.72036338639799e-17	1.10766760873897e-16	28.9234316024897
ZAP70	1.54208368353992	6.83959228070793	9.71996059776462	1.72764739786223e-17	1.11199216258463e-16	28.9192397151291
CRTAM	2.84941321887481	6.16071884173137	9.71943999921352	1.7329927799644e-17	1.11506649686547e-16	28.9161747244318
ALDH3A2	-1.11346127391698	11.75277205286	-9.71122755875582	1.81953062258929e-17	1.1703636584223e-16	28.8678289665423
FSTL1	1.12143971290943	11.0763641259462	9.71086756768819	1.82342099778674e-17	1.17248123804535e-16	28.865709929917
EPHA1-AS1	1.2298510443374	5.38590072777558	9.70967377158811	1.83638162261519e-17	1.1804277934285e-16	28.8586829333885
SMTNL2	-1.92623379046405	9.54698912832169	-9.70817536478635	1.85277932462543e-17	1.19018754452093e-16	28.8498631704071
DCN	-2.48368361891837	10.2615627178965	-9.70225731415621	1.91898195676607e-17	1.23150384317807e-16	28.8150317147019
IRF1	1.00467896203614	9.35144522539472	9.70215199406916	1.92018123268684e-17	1.23187011389294e-16	28.8144118793859
HAO1	-2.46718624756404	4.60207389256579	-9.70162588542007	1.9261832075786e-17	1.23531625279231e-16	28.8113156179261
TSPAN1	-2.43574931599628	11.5502474340996	-9.69753925113409	1.97344571573613e-17	1.26479929963088e-16	28.7872660879804
ST6GALNAC3	-1.19121977919596	8.79078921659157	-9.6971235921474	1.97831715818575e-17	1.26750696251332e-16	28.7848200842434
SMCO3	-1.96267756757243	7.11047599858735	-9.68698432524897	2.1009312538556e-17	1.34474695115336e-16	28.7251608853404
FRMD1	-1.65254496613138	6.53616188215523	-9.68439813263224	2.13340011687531e-17	1.36419278599149e-16	28.7099458696445
C9orf24	-1.58665238646964	6.84198957804087	-9.68363898391497	2.14302560006093e-17	1.36945414853584e-16	28.7054798280507
PKLR	-1.86016708513865	7.59101677468464	-9.67928860868281	2.19902599083043e-17	1.4043242226877e-16	28.6798881536737
TOX3	-2.69825938226883	9.03462403853114	-9.67798527959827	2.21608534609518e-17	1.41416027294637e-16	28.6722216107306
KDF1	-1.73065830214969	6.47023056373326	-9.67638794147736	2.23717298633644e-17	1.42682568692508e-16	28.6628259196702
RAB4B	-1.74889595568975	7.03898501384348	-9.6741303600468	2.26731848739334e-17	1.4455814910352e-16	28.6495471699373
SCN3A	-3.15114966008304	6.04789239656367	-9.67111216326746	2.30825381918311e-17	1.47072388173504e-16	28.6317956111727
SMIM1	-1.79657038039285	6.93240790557147	-9.67030541368117	2.31931984277996e-17	1.47729442959521e-16	28.6270509010993
PHYHIPL	-1.15231951723535	9.29110191659711	-9.66897523171869	2.33768125957064e-17	1.48850601060185e-16	28.6192279267077
SPINK13	2.5532238254293	6.75563476276356	9.66401550473694	2.40743003261137e-17	1.53142555044304e-16	28.5900611168006
GREB1	-1.2907857636971	5.86714174431984	-9.66334060683835	2.41708008900805e-17	1.53706530384389e-16	28.5860924686207
NGEF	-1.22852572825551	7.89057332877376	-9.66084520690606	2.45309665172875e-17	1.55794689816046e-16	28.5714191052127
HTRA4	2.70187924457733	5.45378929509499	9.65500472782137	2.53949795149273e-17	1.60916974947643e-16	28.5370792505341
UBE2C	1.02458366794678	7.519821822117	9.65424068132487	2.55102295886992e-17	1.61595019298292e-16	28.5325872645759
DOK2	1.28106354226007	7.27188616631445	9.65357634595673	2.56108626335074e-17	1.62127679830139e-16	28.5286815618947
VWCE	1.9377202072638	7.20713654279067	9.65188616758702	2.58686768763963e-17	1.63706877010168e-16	28.5187450687668
C9orf66	-2.02266731752854	9.54043980432979	-9.65138525188032	2.59455805938584e-17	1.64140553279222e-16	28.5158002755076
MYH8	-2.9750791358118	7.18031321720821	-9.64967017792234	2.62106191405967e-17	1.65714528879706e-16	28.5057179096995
STAB1	1.20063454748568	9.26293122759747	9.64196524430303	2.74349818939254e-17	1.73283341971977e-16	28.4604277853753
ABCA17P	1.42082711154808	7.20740909012065	9.63516091445196	2.85635337105002e-17	1.80295232590047e-16	28.4204378720061
AK094644	-1.71709996732707	6.86476098345786	-9.63413986689592	2.87368286121744e-17	1.81330683828077e-16	28.4144375649401
HOXB6	-1.17685929921402	8.03633598307913	-9.62602209965492	3.01524005934608e-17	1.899414860036e-16	28.3667373804573
C1orf210	-1.92994128159843	8.12743703011675	-9.62006757522744	3.12347309987627e-17	1.96523111667657e-16	28.3317539388743
PRAM1	2.09115671188914	5.54535073401709	9.6075631089544	3.36352682264675e-17	2.11423227059184e-16	28.2583040831914
ARHGAP4	1.67483090132985	7.02752791426786	9.60517639558521	3.41139291372135e-17	2.14363224482285e-16	28.2442871361568
SLC39A14	1.30256619732712	10.6909961678985	9.60237790950975	3.4683824125589e-17	2.17804636026087e-16	28.227852846176
RSAD2	1.06625477823646	8.03724092165379	9.58635749838609	3.81337243410115e-17	2.39009550162931e-16	28.1337919729886
LGSN	-2.99605676254057	5.84201959035735	-9.58390964681753	3.86901559086323e-17	2.42419554236984e-16	28.1194228805956
DMGDH	-1.41925533391166	10.1640369533703	-9.57398334669456	4.1030695106789e-17	2.56838260427326e-16	28.0611629043663
C9orf84	-1.25802426710518	5.9897415840686	-9.5735358335543	4.11394762370173e-17	2.57436971509994e-16	28.0585366479282
RGS10	1.06955156368621	8.62357049835776	9.56430360587183	4.344887209847e-17	2.7145503482879e-16	28.0043628159172
CPNE6	-2.10150514489275	5.0075570866198	-9.55936248530499	4.47374768674253e-17	2.79416765176759e-16	27.9753735243418
RSPH9	1.63526152479502	6.12476832025349	9.55890558454221	4.48585392340057e-17	2.80083628686613e-16	27.9726930789834
NECAB2	-2.27422292580708	7.06815261573243	-9.55637294230534	4.55355424028777e-17	2.84129606989494e-16	27.9578356417755
FOXJ3	1.34705164306207	10.4649474970262	9.55448071453563	4.6047991485499e-17	2.87075548280432e-16	27.9467356866655
RP11-327J17.2	-1.06505333332423	7.47901131715731	-9.54299388874816	4.92844957581457e-17	3.06935758615792e-16	27.8793635408259
CTC-523E23.1	1.18177878382556	6.51187028105726	9.53971561633781	5.02490667587466e-17	3.1274419161787e-16	27.8601392336429
PAIP2B	-1.36035630058502	9.11540182832178	-9.52939878882143	5.34090465368108e-17	3.31884560264729e-16	27.7996493509525
MISP	-1.7299621146429	7.93812359448207	-9.52881338859887	5.35941725376955e-17	3.32883308832184e-16	27.7962174566243
LGI4	2.1131721694984	6.97100402891679	9.52229488975225	5.56992718352049e-17	3.45677653165985e-16	27.7580061132664
AMICA1	1.66682772619535	8.06069506158733	9.51640110263063	5.76734436875625e-17	3.5758994711564e-16	27.7234618796696
MARCKSL1	1.06613423473824	10.3113166605384	9.50571267737648	6.14331353252553e-17	3.80059349507474e-16	27.6608279704316
TIGIT	2.05395550577039	6.06530879134897	9.5021188739396	6.27513442633687e-17	3.88092015215451e-16	27.6397719471489
LCAT	1.36916875959143	6.50639818992068	9.49840730873019	6.41423330786295e-17	3.96444524127423e-16	27.6180278552569
CDO1	-1.04939250187292	6.90359239108568	-9.49816054223797	6.42358957196386e-17	3.96897641932282e-16	27.6165822496347
SLC4A4	-1.39608993919083	11.2730010008229	-9.49477116877499	6.55348360543387e-17	4.04668321307178e-16	27.5967275110267
OXGR1	-1.91086439996254	5.0205773955395	-9.49030176387122	6.72877727855385e-17	4.15100112944214e-16	27.5705484805587
PRKAR2B	-1.22179782654428	9.07486805698365	-9.48848875172392	6.80120977287716e-17	4.19040900152843e-16	27.5599297689983
CSF1R	1.34088229159096	9.99958877150254	9.48333879678981	7.01122269481141e-17	4.31573346719877e-16	27.5297692945488
HOMER2	-1.14128427055873	6.16238251839393	-9.47858316692468	7.21088750593126e-17	4.43724283292769e-16	27.5019214917145
RP11-250B2.6	-1.27029283479097	6.70673167761478	-9.47752392839731	7.25612525811394e-17	4.4622779709374e-16	27.4957192861002
CENPH	1.36829229353246	6.5471701928474	9.47434832333867	7.39344975945689e-17	4.54245209515973e-16	27.4771259796001
C5AR1	1.25627073937253	9.14912604113871	9.47386671706415	7.41450102826661e-17	4.55309531906255e-16	27.4743062786533
KLRC3	2.26361376296089	4.56557528366671	9.47158399009123	7.51509535524684e-17	4.61253683941029e-16	27.4609418519383
SIPA1	1.22676711434442	8.24581212218074	9.4689356041877	7.63350826088601e-17	4.6826018280158e-16	27.4454375702611
PTGDR	1.02559445316899	5.67148289930847	9.46575669058632	7.77809867569903e-17	4.76682163680504e-16	27.4268287706638
CD3D	1.91931489959312	8.62027452828562	9.46356322123369	7.87945451188684e-17	4.82551646493981e-16	27.4139894272129
TMEM92	1.44438639714777	6.69415513774993	9.4635244393547	7.88125833168648e-17	4.82551646493981e-16	27.4137624259438
ADAMTS16	-1.99753179389144	4.57253511140802	-9.45995684852463	8.04896551763874e-17	4.92358536767171e-16	27.3928812293617
RP11-21L23.2	-2.07904550476185	6.62789266529018	-9.45756715977117	8.1632846849078e-17	4.98884367132859e-16	27.3788953394583
NME8	2.64580147398313	3.54934922694434	9.45735865394087	8.17333568403085e-17	4.99342911693643e-16	27.3776750771938
SARDH	-1.06774633207518	6.22303372122663	-9.45691414328271	8.19480444243543e-17	5.00498511272334e-16	27.3750736379381
CTD-3092A11.2	1.05650446472167	9.85005468466461	9.45488768840096	8.29339116444477e-17	5.06361911002969e-16	27.3632144398357
VNN2	1.93560088255483	7.26132898440481	9.45190113137816	8.44084441243555e-17	5.15204327746261e-16	27.3457376147035
CDC45	2.03960956594662	3.94387067325773	9.44587254321454	8.74649338204767e-17	5.33361928421756e-16	27.3104632407065
CBR3	1.23153365962814	7.53429338877916	9.44376212982476	8.85607616367784e-17	5.39540679925154e-16	27.2981160606389
SLC5A12	-2.79123567872508	10.0346399321794	-9.44207109525668	8.94486890774933e-17	5.44780875459848e-16	27.2882229605309
OSCAR	1.45873443115843	6.31681245093349	9.43199330628909	9.49272804814548e-17	5.76356806120208e-16	27.2292731948747
F2R	1.04052107332891	9.98812788689966	9.41356386609471	1.05824867273658e-16	6.41925587649777e-16	27.1215087976055
NINJ2	1.97915042978105	6.62230996154637	9.4056373403766	1.10887070546836e-16	6.7159323104062e-16	27.0751744519222
SIRPG	1.7745999695555	5.0981697424985	9.40347775355865	1.12307601293271e-16	6.79566742126216e-16	27.0625522295469
GAPT	1.4487194148156	7.07659961931896	9.40304229412794	1.12596225801712e-16	6.81102910335725e-16	27.0600071656987
TMEM255B	1.04426332756951	7.42771053189936	9.40277037882645	1.12776827098448e-16	6.81984891793423e-16	27.0584179576269
DHRS9	1.00004905113545	6.87048588715221	9.39956693111371	1.14926347460323e-16	6.94554882477606e-16	27.0396962376729
CTSW	2.2760996284157	5.68242128631126	9.39929831180472	1.15108435242724e-16	6.9544088234345e-16	27.0381264304334
CDKL2	-1.03977461486115	8.01451211887904	-9.39761689807373	1.16254754473256e-16	7.02150056370217e-16	27.028300515357
SHROOM3	-1.51344946066798	8.35310773592722	-9.39663558271578	1.16929022391173e-16	7.06004901369255e-16	27.0225660568229
LILRA6	1.56856889321451	6.72127957154037	9.38976180987519	1.21762499658224e-16	7.33832481796287e-16	26.9824021577535
FAM64A	1.6603511558405	5.98874602602635	9.3830138407628	1.26701010565394e-16	7.62423428330106e-16	26.9429801453553
PROX1	-1.53868717209834	6.51749499008102	-9.36541395353762	1.40540428722038e-16	8.43888438273048e-16	26.8401925238052
ATP8B3	1.54541712650196	6.2467009330593	9.36288301648718	1.42650719055606e-16	8.56035346837361e-16	26.8254150461858
DCLK2	1.00218973796444	5.90088516938658	9.35810840826757	1.46718076142501e-16	8.79904398505779e-16	26.7975399805369
CXCL13	3.52662389236918	5.3715551942583	9.35395171105809	1.50352974353838e-16	9.01152276562959e-16	26.7732751894921
[truncated: 971 more rows]
