# Supplementary material for: Identification of 9 key genes and small molecule drugs in clear cell renal cell carcinoma
Source: Aging (Albany NY). 2019 Aug 18;11(16):6029–52. doi: 10.18632/aging.102161 (PMC6738436; doi:10.18632/aging.102161)
Supplement: Supplementary Table 4 [file aging-11-102161-s004.xls]

logFC	AveExpr	t	P.Value	adj.P.Val	B
LGALS1	2.86161857666321	-0.258644632579216	19.3989228040467	1.1879151653463e-25	2.3281949325622e-21	48.1237518051009
LAPTM5	3.53446884864601	-0.379028364637499	18.9548904686434	3.46254792265783e-25	2.46486012976925e-21	47.0765698203805
IFI16	2.79589542837812	-0.0719878775860276	18.9195926112964	3.77293759340158e-25	2.46486012976925e-21	46.9924742568973
ENPP6	-4.93388299062049	-0.124334629419726	-18.7417923985964	5.82476232547048e-25	2.8539879204224e-21	46.5669430638515
LAIR1	3.33295254761408	-0.51476561296948	18.546110412054	9.4273686270275e-25	3.45403416544587e-21	46.0948626127833
TACC3	4.74612561341303	-0.977562513454094	18.4996831949589	1.057411347144e-24	3.45403416544587e-21	45.9822756618238
C1QC	4.11966122398035	-0.593177357361522	18.4057651426322	1.33467697802631e-24	3.73690487033395e-21	45.7538357604675
P2RX7	3.72065134985207	-0.527133399901381	18.3234388960092	1.63809561838963e-24	4.01312950310229e-21	45.5528318343968
CD86	3.16568300676887	-0.580507387436282	18.2218212764788	2.11132216789636e-24	4.28591665859282e-21	45.303743822017
BSND	-2.63914299887202	-0.0531451005158549	-18.2077886051735	2.18680374437105e-24	4.28591665859282e-21	45.2692608538523
TMEM213	-5.01342149315695	-0.552789979154126	-17.8350156278877	5.60059233550159e-24	9.97872810759052e-21	44.3455493278317
FCER1G	3.28317981227106	-0.346781320618484	17.5604229276402	1.12992906764175e-23	1.8454566497259e-20	43.655532269266
TYROBP	3.42551344574763	-0.145040334278435	17.4201248867481	1.62222077112993e-23	2.44568499179811e-20	43.2997939882499
DMRT2	-4.32935178456959	-0.5296532160908	-17.3053667849799	2.18397345845661e-23	3.05740684373508e-20	43.0071963454171
ATP6V0A4	-5.07773648171139	-0.584185100402402	-17.2114857322762	2.7883224712855e-23	3.50593050808673e-20	42.7667389354742
DIO1	-5.34290995791067	-0.123035689014511	-17.2014669525172	2.86213011528076e-23	3.50593050808673e-20	42.7410197034566
CLCNKB	-5.2127142356731	-0.155482620090708	-17.036058639743	4.41256172783209e-23	5.08716454728124e-20	42.3147709346615
SLC4A1	-3.14398078849672	-0.2220199027927	-17.0101234995745	4.7237211690855e-23	5.1433450662726e-20	42.2476578529718
SMIM5	-3.20875102577772	-0.0339534817290697	-16.8457968505896	7.28660177250853e-23	7.41437597367166e-20	41.8206528003127
XPNPEP2	-5.94261732715201	0.684117249005001	-16.8315800304761	7.56607579332788e-23	7.41437597367166e-20	41.7835657791004
ABAT	-3.10597640016623	-0.165044053890102	-16.7645956878006	9.0367905026834e-23	8.43390747914724e-20	41.6085147919057
LY86	2.68650275200761	-0.174110866822814	16.5771623350226	1.48939752776663e-22	1.28779436376222e-19	41.115955286099
ITGB2	3.12880973619729	-0.17337802026299	16.5618136249328	1.55186787023442e-22	1.28779436376222e-19	41.0754406103224
SLC4A9	-3.90776135001217	0.0964549114107047	-16.555821753231	1.5769715153984e-22	1.28779436376222e-19	41.0596169777063
PAG1	2.73261054938117	-0.0195081761988012	16.5027903994888	1.8179402465058e-22	1.42519243565069e-19	40.9193877225941
SLC13A3	-4.55129262297613	0.0429887195065782	-16.4806495475819	1.92931461078678e-22	1.4543321944927e-19	40.8607447150591
FAM49A	3.22127898377797	-0.492917475067667	16.396262894335	2.4212670805787e-22	1.75757087082451e-19	40.6367122030045
KNG1	-6.02392780888982	-0.103913803888419	-16.318542925927	2.98672493155216e-22	2.09060078333896e-19	40.4296431030845
AQP2	-4.19535647101296	0.1974433545541	-16.281809406706	3.29898123012842e-22	2.16849958190935e-19	40.3315278198776
TMEM178A	-3.799814295005	-0.372613014338862	-16.2795427846116	3.31930136523704e-22	2.16849958190935e-19	40.3254684808547
PSMB9	2.78547061666832	-0.00101048181319215	16.209626859534	4.01264762773296e-22	2.53689938244962e-19	40.1382661823549
TMPRSS2	-3.33544546345081	-0.295790410591679	-16.1892467853644	4.2412182132056e-22	2.59761361751926e-19	40.0835894655499
MS4A6A	2.74815033447712	-0.350808232450591	16.1755497378197	4.40222308059105e-22	2.61452030777285e-19	40.0468147850325
TMSB10	1.60167439711997	-0.133697286172695	16.1520079390741	4.6935926925856e-22	2.7055800935878e-19	39.9835565452079
TLR8	3.70218446000047	-0.270518561948201	16.1282881448079	5.00699028187279e-22	2.71294982272871e-19	39.9197537635528
TFCP2L1	-4.04566207628109	-0.328148767614597	-16.1238270759515	5.06826510145835e-22	2.71294982272871e-19	39.9077467033831
CRLF3	1.59603849674497	-0.0489995786151615	16.1199851097487	5.12164617791532e-22	2.71294982272871e-19	39.897404082969
C1QA	3.67487119120996	-0.459070180934183	16.0853334255548	5.62966178313288e-22	2.90357213914793e-19	39.8040423214968
PRDX4	1.99206485081004	-0.133818932769185	16.0703867927643	5.86430927249094e-22	2.92904406337202e-19	39.7637277813677
HCLS1	2.7136469282427	-0.149888469908009	16.0555876078999	6.1064294507203e-22	2.92904406337202e-19	39.7237848201774
FXYD5	3.15548835140287	-0.391560399883236	16.0543342950181	6.12739459147165e-22	2.92904406337202e-19	39.7204009375369
SLC7A8	-3.31426328283218	0.321640193842667	-16.0116250473093	6.88725524635905e-22	3.15521178278775e-19	39.6049765062582
IER5	2.03259570799331	0.082247730722495	16.0054965487816	7.00388160691984e-22	3.15521178278775e-19	39.5883960521243
PLG	-5.12559389214685	0.337794935970813	-16.0013724865044	7.08348989451815e-22	3.15521178278775e-19	39.577236018417
SLC22A8	-6.45110287475345	-0.09756936196816	-15.9420075639442	8.33675839260634e-22	3.63093617192648e-19	39.4163653089861
TREM2	5.07601788970911	-0.75143408474138	15.887540509214	9.68420647619699e-22	4.06114539654553e-19	39.2683969629185
RAB31	1.80014638715718	-0.0468835654849958	15.8854933435547	9.73895778548089e-22	4.06114539654553e-19	39.2628285941171
C1QB	3.7882245887881	-0.290148806297458	15.8536203645764	1.06331034096867e-21	4.26561620287733e-19	39.1760681134126
TMEM52B	-4.71961671995739	-0.076900478426488	-15.8525483731028	1.06645846186535e-21	4.26561620287733e-19	39.1731479609032
ERP27	-3.35604415351742	-0.283613113670518	-15.7442845119199	1.43848691469217e-21	5.63858100821037e-19	38.8775213609271
SLC12A3	-5.32445818182352	0.74749870318517	-15.7173701608738	1.5499069376685e-21	5.95620119046371e-19	38.803809705205
APOC1	5.26042263401662	-0.427624449522166	15.692224485067	1.66191609255154e-21	6.26382567267646e-19	38.7348630091151
BIN2	3.85921554868609	-0.414870139549953	15.6769470061597	1.73394684208032e-21	6.41200455810043e-19	38.6929365244383
SLC26A7	-3.0525639700924	-0.204519168183579	-15.663389380648	1.80051995668313e-21	6.53488715389495e-19	38.6557062539006
PSMB8	2.33197392850246	0.0265257569298305	15.6345370005812	1.95096548361026e-21	6.95217682059592e-19	38.5764013787039
SLC15A2	-2.01308645829208	0.0116852703646001	-15.599929900041	2.14836455019935e-21	7.51889228917091e-19	38.4811457818517
RALYL	-5.30932070208699	-0.522127822690438	-15.5774847282469	2.28711765036175e-21	7.76542377092112e-19	38.4192880531679
HK2	5.86497884668216	-0.599141782456326	15.5757756159523	2.29804877143438e-21	7.76542377092112e-19	38.4145753217717
PYGL	2.53547413043287	-0.0860144393887362	15.5553997088788	2.43252770871507e-21	8.08052721408587e-19	38.3583631537545
SLC34A1	-4.05743779627116	0.0965376726143063	-15.5195518572393	2.68881973313195e-21	8.78244329123855e-19	38.2593450882386
CD300A	3.15723284561592	-0.298688089848186	15.508853730925	2.77049425305382e-21	8.78244329123855e-19	38.2297646708121
SLC13A2	-3.98560072855029	-0.100990991388419	-15.5078530491764	2.77826156465529e-21	8.78244329123855e-19	38.2269970634428
ALDH6A1	-3.27011734426631	-0.0677468262440017	-15.4942607902456	2.88598074332634e-21	8.97017018437319e-19	38.1893925683303
PAPPA	-2.42810551182258	-0.0596382271894772	-15.4889533515097	2.92918461043872e-21	8.97017018437319e-19	38.1747028343958
TGFBI	4.33119724206349	0.0802178242697474	15.4764652073142	3.0334492252137e-21	9.1465494407636e-19	38.1401250541688
PACRG	-2.0307139984978	-0.245252811909491	-15.4567326092724	3.20593494336839e-21	9.45165652279297e-19	38.0854496805501
CALB1	-6.44635686267258	-0.165071588035362	-15.4539453976177	3.2310882546412e-21	9.45165652279297e-19	38.0777230012048
SRGN	2.36769932444158	-0.295986290042756	15.4466077467749	3.2982692586234e-21	9.50629105878824e-19	38.0573771034993
SUOX	-1.31380090685756	0.0505305973073401	-15.3852319942663	3.91876806040941e-21	1.10177939918705e-18	37.886936047592
IL10RB	1.58798722957577	-0.0729071953446168	15.3832743154677	3.94040277415218e-21	1.10177939918705e-18	37.8814919655479
DDB2	3.34618963656135	-0.00889364884914767	15.3787075656817	3.99134330028473e-21	1.10177939918705e-18	37.8687905282918
EHD2	3.20495718142208	-0.117237394364655	15.3074111577741	4.87920334641227e-21	1.32815981092131e-18	37.6701630496492
RHCG	-4.85690886218616	0.304850262929512	-15.2897954713924	5.12792338458173e-21	1.37674206047147e-18	37.6209906077266
ACAA1	-2.14547378514863	0.316269083346952	-15.2568620255615	5.62798317725439e-21	1.4905789498785e-18	37.528957722155
HEPACAM2	-4.40119572866236	-0.207528851557097	-15.2439639668793	5.83706672864892e-21	1.50835353570319e-18	37.4928775443205
ETNK2	-2.42130237141721	0.129410177156629	-15.2432410494988	5.8490162106966e-21	1.50835353570319e-18	37.4908546961065
ITGA4	2.90877763881479	-0.262335991231299	15.235260149049	5.98259829647842e-21	1.52123569786547e-18	37.4685184700269
EVI2B	2.69199553625112	-0.2010587932004	15.2293539064942	6.08344533279589e-21	1.52123569786547e-18	37.4519835522322
ATP1A1	-1.5364456854497	0.101897046112274	-15.2265557140778	6.13182407935979e-21	1.52123569786547e-18	37.4441483247208
CSF1R	1.91568943136324	-0.0702262301927506	15.1964509127532	6.67768336160762e-21	1.63594895255185e-18	37.3597906477282
VSIG4	2.67395003184685	-0.227481660921056	15.1844258954921	6.90927600301278e-21	1.67178889361787e-18	37.3260636588394
LIPA	2.04874251106101	0.0212385828202452	15.1771408227896	7.0535292630392e-21	1.68587951251592e-18	37.3056222663828
CAV1	3.64012436753551	0.112211384402857	15.097997292337	8.8323070229262e-21	2.08559500412447e-18	37.0831279172366
INPP5D	2.39662624859115	-0.45843537202381	15.0848448308888	9.16930605795484e-21	2.13939558845068e-18	37.0460774903072
RHBG	-4.17204116995984	0.260245165671668	-15.066933827047	9.64932392440994e-21	2.22490705405306e-18	36.9955877411161
ACSF2	-4.04697739458591	0.223351335594827	-15.0596179746622	9.85265378487769e-21	2.24537397127695e-18	36.9749534534247
HOXB-AS3	-2.41537093491711	-0.126869628225674	-15.0288026256038	1.07579674852058e-20	2.40358752902267e-18	36.887966055535
ENO2	4.75145201567929	0.190049011796163	15.0276907065741	1.0792168098066e-20	2.40358752902267e-18	36.8848250572155
ATP6V1G3	-4.42465988063619	-0.266310182948062	-15.003658919531	1.15589189817296e-20	2.54542981036987e-18	36.8169013989369
CSTA	2.99558467082196	0.0452781754723642	14.994905850959	1.18517315129817e-20	2.5809120658103e-18	36.7921437834696
TNFSF13B	2.82336458255019	-0.0549424989480338	14.9671522736177	1.28308904871406e-20	2.75478925411724e-18	36.713581058088
RECQL	1.77104946413896	-0.0869923161013666	14.9644285712908	1.29313031980604e-20	2.75478925411724e-18	36.7058658332663
NUSAP1	2.24055998452002	0.00363591067919796	14.9576054333643	1.31863618347473e-20	2.7789194150453e-18	36.686534385902
AGPAT9	-3.59061666211726	-0.26642150519219	-14.9349310654118	1.40712204037958e-20	2.93384945419143e-18	36.6222511936024
CTSS	3.08627224948703	-0.37876111749608	14.9208416034947	1.46511760737452e-20	3.02261473546666e-18	36.5822743869092
CXCR4	3.42046539579811	-0.289732897162933	14.9120330610843	1.5026020540178e-20	3.06765600590571e-18	36.5572688244782
CSF2RA	2.8138673983883	-0.380351695477948	14.8687948529789	1.70121106908134e-20	3.43732327246652e-18	36.4343841245328
HRG	-4.53047272774234	0.189235496960305	-14.8539123373696	1.77557086952745e-20	3.55096055835392e-18	36.3920332966801
MARCKS	2.20570216874472	-0.320867158970837	14.8335095395655	1.88290486541044e-20	3.72758105628073e-18	36.3339284326544
CLDN8	-5.74086326961233	-0.481645333706091	-14.8067907967092	2.03349270312973e-20	3.98544234886395e-18	36.2577575373855
PVALB	-4.95471295308457	-0.115109361281747	-14.7583875219507	2.33814164566824e-20	4.53715228846058e-18	36.1195392372873
ATP6V1C2	-3.7651231025194	-0.124172105553162	-14.7516051464211	2.38438298830454e-20	4.58152178311576e-18	36.1001482593037
RHOG	1.24997568471736	0.0364452724531386	14.6991295624421	2.77500018764998e-20	5.28031346385942e-18	35.9499236095251
ACADSB	-2.06113898192168	0.141963994371424	-14.6912899088188	2.83869507997296e-20	5.34957546849904e-18	35.9274508365225
SLFN11	3.10000484801123	-0.0170506888871011	14.6414785391616	3.27955997829358e-20	6.12153295376914e-18	35.7844828651901
EHBP1L1	2.55465164001063	-0.158599354835869	14.6318201363351	3.37277708884478e-20	6.23613756266687e-18	35.7567251843351
PTPRC	2.3576873727302	-0.380426422803343	14.6271521879831	3.41878836744217e-20	6.26213394518683e-18	35.7433055513889
ASAP1	1.62000503229943	-0.137967268192545	14.6025260546835	3.67228064566404e-20	6.6641692939231e-18	35.6724636179767
ATP6V0D2	-4.09801346073346	-0.835617535300827	-14.5884131278914	3.82606654659007e-20	6.87954846299255e-18	35.6318304282029
RPL36	1.7841167941254	0.0869371330735648	14.5781963505083	3.9414599941399e-20	7.02260676592255e-18	35.6023990980616
KCNJ1	-5.95594170253357	-0.802222287469475	-14.5592120946028	4.1653398560021e-20	7.35463926466533e-18	35.5476763205895
LHFPL2	2.47190693171391	0.173408089476886	14.5426828927082	4.3707553655762e-20	7.64843164374356e-18	35.4999931418054
CD14	2.51887064132048	-0.156331863817939	14.5367634108242	4.44679346223901e-20	7.71262876694003e-18	35.4829082937883
ALOX5AP	2.6446468553334	-0.104782254448892	14.4368625620441	5.95307789977045e-20	1.02345941892632e-17	35.1939029106918
PRLR	-2.68123304431412	-0.0370347003997605	-14.4283358742643	6.10351126981409e-20	1.04019754240945e-17	35.1691771151162
FHIT	-1.46761231456947	-0.121555385735238	-14.4225633640086	6.20753718482579e-20	1.04880621797759e-17	35.1524326655533
RFC2	1.63421267162715	-0.00864422998547722	14.3976134041369	6.67825385879161e-20	1.11869313998681e-17	35.0800109616154
GPR34	2.74313458863796	-0.253825251776751	14.3845874842001	6.93823296796571e-20	1.15239345711153e-17	35.0421694012254
DPEP1	-4.91700177664482	-0.23230537426916	-14.3460393187558	7.76936488072699e-20	1.27959480922158e-17	34.9300565060932
GGT6	-4.17884367517631	-0.340233901029526	-14.3425122797955	7.85028343684592e-20	1.28214754232286e-17	34.9197890537097
CWH43	-4.12734422225744	-0.879725912199446	-14.3223044150817	8.33066163152801e-20	1.34936063897783e-17	34.8609319570618
TUBB6	2.34272472212883	0.17025904669716	14.3128498220422	8.56554964741225e-20	1.37603448802978e-17	34.8333767555829
IL10RA	2.50022382193394	-0.0978121365640236	14.302323487515	8.83497809688124e-20	1.4077783391933e-17	34.8026845507253
CTHRC1	4.9212018440934	-0.136256661163356	14.2746938925339	9.58380591443766e-20	1.51478235578277e-17	34.7220560563885
SLC22A12	-4.4080716440077	-0.280190050513055	-14.2633074684691	9.91084767521084e-20	1.55394162869166e-17	34.6887998605446
MS4A7	3.51993472669291	-0.264362727944465	14.2438094769553	1.04973880625315e-19	1.63284371934568e-17	34.6318137682619
DENND5A	1.34590098964203	0.028681729162264	14.2277803777243	1.10058729153068e-19	1.69845750604014e-17	34.5849296242252
TFAP2B	-3.48939470919038	-0.363551112109045	-14.2081458172612	1.16629223896748e-19	1.78579387433778e-17	34.5274548641162
RASSF2	2.94743704198877	-0.248193508780062	14.2053914640234	1.17582237771854e-19	1.78642967293842e-17	34.519388302448
SFXN2	-2.50185559541564	0.327716360888762	-14.2014039556896	1.18975939157458e-19	1.79369956272848e-17	34.5077085264425
CDCA7L	3.00953735677845	-0.0203546466671273	14.195958789233	1.20906221149676e-19	1.80888628115458e-17	34.4917558434934
FAM129A	2.37056799981802	-0.118031080952968	14.1866617922036	1.24275670288115e-19	1.84521125907331e-17	34.4645096780572
GLIPR1	2.48952649499005	-0.211173170067112	14.1634425754441	1.33112920369079e-19	1.95950004947072e-17	34.3964140402336
AFM	-4.90131858377466	0.210086941812194	-14.1612677046351	1.33972655048256e-19	1.95950004947072e-17	34.3900321920747
SLC22A7	-3.68291795895344	0.294238371713756	-14.1521808185196	1.37626088046312e-19	1.99802496268123e-17	34.3633614509091
SAMHD1	2.3298282006845	-0.257896205255749	14.0597290809881	1.81065333229262e-19	2.60933784261788e-17	34.0914048367744
CASP1	2.46365235024857	-0.257420028116915	14.0553197253043	1.8345467977007e-19	2.62207865510305e-17	34.0784067691274
APOBEC3C	2.81834053885617	-0.148211717107012	14.0531808978157	1.84625161694077e-19	2.62207865510305e-17	34.0721009494966
FGF9	-4.73389223074078	-0.57741901855818	-14.0499653547458	1.86399148768723e-19	2.628227997639e-17	34.062619583376
ALDOA	1.51802940184548	0.0311602723091545	14.0457947923859	1.88725788807154e-19	2.64202623916529e-17	34.0503202583909
CD84	2.00131182321952	-0.256691257329743	14.0240827625691	2.01322802085536e-19	2.79838694898894e-17	33.9862535203003
TIMP1	2.67994495246217	-0.187190098006294	14.0208314471457	2.03281251458005e-19	2.80571073755313e-17	33.9766544751411
TCEAL2	-4.33940644739075	-0.0656738200434715	-14.0084026976495	2.1094757399183e-19	2.89116188997613e-17	33.9399477991142
SLC12A1	-3.93976503328936	-0.416874948838555	-13.9987531265786	2.17101341292115e-19	2.95483971387789e-17	33.9114353209272
GMFG	2.34931212474758	0.00137199174356628	13.9797955582643	2.29726498579821e-19	3.10511010045925e-17	33.8553846546448
FABP1	-4.40912030152273	0.0230006361093499	-13.9674868905881	2.38319893908973e-19	3.19208234930022e-17	33.8189675411219
ST8SIA4	3.29098579046221	-0.50805773672508	13.9659460052619	2.39418391421569e-19	3.19208234930022e-17	33.8144072136707
FPR3	3.34802000462678	-0.281347279491342	13.9460091254611	2.54103250535654e-19	3.36497946435695e-17	33.7553753622876
SQRDL	1.45486885592013	0.0520721709142271	13.940906742736	2.58006168724624e-19	3.39373349049255e-17	33.7402592734793
PREX1	1.59419718017118	-0.0708876099363428	13.9053414499128	2.86953832105063e-19	3.74040595486349e-17	33.6348016528932
PPP1R18	1.9790983922848	-0.0491461849508664	13.9039180390673	2.88178631146685e-19	3.74040595486349e-17	33.6305775739879
LST1	1.898504142843	-0.0718900983598399	13.8995475732245	2.91972502829266e-19	3.76471650194131e-17	33.617606249371
RAC2	3.60782782798603	-0.250431309133216	13.8969019217901	2.94293683054417e-19	3.76984437528334e-17	33.6097528870452
LDHA	1.48568543868658	-0.0832100963119412	13.8828374312174	3.06951143389201e-19	3.90645159693828e-17	33.5679885898705
EVI2A	2.94988965886944	0.0616527852262588	13.8669290357951	3.21935003431795e-19	4.07071234339339e-17	33.5207179825714
GPD1L	-1.9552812004742	-0.123929789881593	-13.8135571658466	3.77844192747991e-19	4.73283520612736e-17	33.3618879569004
UPP2	-4.40464360691617	0.354175276998848	-13.8124269496817	3.79129102179701e-19	4.73283520612736e-17	33.3585205398033
SLA	2.56576296441354	-0.0697883035363305	13.7805362429809	4.17270190715535e-19	5.17599903027454e-17	33.2634356234024
MAN1C1	-2.5485601737983	-0.167066009518198	-13.7607607571252	4.42853636849644e-19	5.45879775384666e-17	33.2044069900526
AP5M1	-1.08420364356284	-0.0162171601928028	-13.7555937836119	4.49796424922353e-19	5.50972508253325e-17	33.1889755183725
IL4R	1.53056191387723	-0.132613573538918	13.7437717406944	4.66099594978312e-19	5.66205319305145e-17	33.1536552450648
DCXR	-2.72827497626038	0.508283275897446	-13.7424140261434	4.68009907278093e-19	5.66205319305145e-17	33.1495976900213
HLA-DRA	2.24558208811754	-0.260901144057598	13.7248164328335	4.93500265656625e-19	5.93381086294736e-17	33.0969852848786
ALDOB	-3.12629284603751	-0.41900197091637	-13.7160564640244	5.06709506509476e-19	6.05548757199952e-17	33.0707801632487
DCK	1.83583657402026	-0.378837459869858	13.6944174127973	5.40896988370758e-19	6.42487277277484e-17	33.0060049796732
PTH1R	-4.36949726037584	0.053802580185573	-13.6482769488186	6.2181606815269e-19	7.34155007212324e-17	32.8676828662924
MNDA	2.87172047359291	-0.296691755798288	13.6445875015257	6.28794037371971e-19	7.37948163979237e-17	32.8566104965979
HADH	-1.63406124098658	0.102726835958872	-13.636326597987	6.44707435150248e-19	7.52120298899388e-17	32.8318123388878
RPS19	1.05345729507672	-0.03092446765841	13.6263875560704	6.64395769009601e-19	7.68656889794231e-17	32.8019648467566
GLYCTK	-1.68837396932928	0.207252599773357	-13.6252309159712	6.66726216975454e-19	7.68656889794231e-17	32.7984905566373
SLC6A19	-3.96326519151521	0.0467753030343054	-13.6017393067684	7.15893853986989e-19	8.20514832999474e-17	32.7278892493847
CA10	-4.08775269892849	-0.590675246319776	-13.598477031289	7.2300659259501e-19	8.2384919815521e-17	32.7180791707251
LYN	1.48003523802319	0.00326411359607273	13.5877301319831	7.46948829137257e-19	8.46210988570006e-17	32.6857520585174
ENTPD1	2.84579348666968	-0.372519529213493	13.5827993318374	7.58201270503171e-19	8.54022224171934e-17	32.670914970123
BID	1.47491294355494	-0.0625091817397859	13.5806381679906	7.63187222228355e-19	8.54726078197345e-17	32.6644108924763
CMTM4	-1.55688640676364	-0.15920337752125	-13.5658175037577	7.98287032857476e-19	8.88577588802934e-17	32.6197913117388
TUBAL3	-3.74718867627031	-0.00642224174063115	-13.5640910179056	8.02480908302053e-19	8.88577588802934e-17	32.6145916330321
ERBB4	-2.56208340591033	-0.201754258788754	-13.557425767808	8.18882386733611e-19	9.01644713347867e-17	32.5945141682387
ACOT11	-1.66608718229564	-0.072447195612265	-13.5482917106657	8.41912485450469e-19	9.21823620242668e-17	32.5669905994134
CD97	2.3578540209587	0.130429561042077	13.5459142521306	8.48013848382493e-19	9.23345745247138e-17	32.5598248399612
KCNJ10	-3.76670400796586	-0.470949782876045	-13.5360599440176	8.73785055468488e-19	9.46002311678894e-17	32.5301156763781
PRIM1	1.59516343864469	-0.0344257048200197	13.5342981455804	8.78475538168063e-19	9.46002311678894e-17	32.5248027999341
TAP1	2.26825671682412	0.22421480854518	13.5289009102594	8.93004219518804e-19	9.56392879691204e-17	32.5085243836983
C6orf136	-1.15774072131415	0.0595283311399112	-13.4982848088379	9.80153655059666e-19	1.0440234502997e-16	32.4161122143992
DTL	3.38662018765556	-0.0792505079702616	13.4866488971027	1.01549432170046e-18	1.07582017356796e-16	32.3809580636515
CRYAA	-5.32450426678289	0.567110357891307	-13.4843039500212	1.02277135058403e-18	1.07770406989766e-16	32.3738714209609
ARHGAP9	2.44850787004128	-0.284580633872004	13.4738918271715	1.05572700447588e-18	1.10648093907608e-16	32.3423963612119
RCSD1	1.9414692877707	-0.0839409626549281	13.4234696759304	1.23121559806133e-18	1.28354226097894e-16	32.1897734688217
GGTA1P	2.36723242468002	0.158560942829873	13.4119230816585	1.27540143953401e-18	1.32257104832948e-16	32.1547762605115
PNP	-1.66546875074732	0.09349382351633	-13.4087094682813	1.28798267404318e-18	1.32468428768879e-16	32.1450328388025
FBL	1.37744787321837	0.00696160584248511	13.4079543421461	1.29095718632868e-18	1.32468428768879e-16	32.142743159924
ALDH4A1	-2.72714960153998	0.0807284117546654	-13.3930113114849	1.35127294139562e-18	1.379354082209e-16	32.0974178371861
CHST14	1.53904881899751	-0.0500468492478408	13.3833043666998	1.39197677406372e-18	1.41354159558937e-16	32.0679589890374
HLA-G	2.05488417745182	0.00801868007793489	13.3749852761874	1.42784885289748e-18	1.43510121822888e-16	32.0427022123697
HCK	2.47667862524094	-0.255025566247988	13.3749845275527	1.42785212283602e-18	1.43510121822888e-16	32.0426999391053
C1orf162	3.03095103781101	-0.0852039175981604	13.3666476728335	1.46474123244666e-18	1.46466650075113e-16	32.0173801358909
ERICH4	-3.49540856841075	0.335846282140669	-13.3562099094037	1.51229178450752e-18	1.5045384103839e-16	31.9856668419818
MS4A4A	3.09946088143735	-0.202931674252769	13.3454114070577	1.56313371477396e-18	1.54726553918459e-16	31.9528424838596
FOXI1	-3.62536365687064	-0.514111153852157	-13.3434770464335	1.57242248887868e-18	1.54863861103182e-16	31.9469609671448
RP11-999E24.3	-3.9583583561604	-0.217817967586633	-13.2992913386805	1.80053693756196e-18	1.76443617196385e-16	31.812478627406
FIGNL1	1.69559328365452	-0.147687704599549	13.2872990463929	1.86804897178829e-18	1.82148715413327e-16	31.7759350629193
CNKSR1	-1.87727015161367	0.0588315870735527	-13.2855325168675	1.8782084329754e-18	1.82232708306361e-16	31.7705504040831
FCGR1B	3.44271040317055	-0.231055159143741	13.2472705988936	2.11254230419879e-18	2.03959195172375e-16	31.6538216023215
SAT2	-1.95314136832318	0.33208308414809	-13.2371531611856	2.17931981277677e-18	2.09374946130451e-16	31.6229233759892
TNFAIP6	5.96017385016692	-0.0116916453471742	13.2315759706815	2.21704125829741e-18	2.11959959128638e-16	31.6058851264973
FAM26F	2.97328372349831	0.0515116084184964	13.2255363134159	2.25863742747965e-18	2.14888519131911e-16	31.5874294404829
PTRF	1.60607256977264	-0.0498868393452167	13.222643703413	2.27883858894528e-18	2.15763079733036e-16	31.5785886494926
HS6ST2	-4.52027353911313	0.0196973667318259	-13.2170267019083	2.31859070842693e-18	2.1847143891567e-16	31.5614180614629
LY96	2.90226817549838	-0.103149295950444	13.1949153219401	2.48202600468868e-18	2.32752285482744e-16	31.493785614267
TM6SF1	3.01280268400136	-0.519380481048065	13.1697180818327	2.68256391425537e-18	2.49363480604398e-16	31.4166360911917
PSMB10	2.32108555250438	-0.0682916462603902	13.1694708111588	2.68461117442359e-18	2.49363480604398e-16	31.4158785784336
UBE2L6	1.52614884339824	0.1904109473196	13.1543128982038	2.81318177427066e-18	2.58276170918313e-16	31.3694270247647
PROZ	-3.7084341525315	0.40571728411479	-13.1539188054123	2.8166064799089e-18	2.58276170918313e-16	31.3682189212334
SLC5A11	-3.76015352473114	0.0658385659839626	-13.153517524368	2.82009799359758e-18	2.58276170918313e-16	31.3669887609148
HLA-C	1.25212497407507	-0.0731793321875774	13.151391922919	2.83866596440097e-18	2.58767508075789e-16	31.3604722003661
HAUS3	1.1183463931222	0.0374151523937314	13.1152236114544	3.17430471332274e-18	2.88024065168576e-16	31.2494981834732
LILRB1	3.05919029411037	-0.650786276808179	13.092113499317	3.40955832638782e-18	3.07944394649193e-16	31.1785001170313
VIM	1.93627739409711	-0.148657041891992	13.0764455789104	3.57903189700727e-18	3.21768101602961e-16	31.1303257217383
DNASE1	-1.86516254072111	0.121794611002287	-13.0716394745165	3.63270974691973e-18	3.25102640775707e-16	31.1155418448015
SERPINA5	-4.69283136016227	-0.155939753587758	-13.0611293427057	3.75295458072898e-18	3.34337076489578e-16	31.083201431317
THEMIS2	2.10059467388155	0.0733014988183044	13.0250482906139	4.19731222484056e-18	3.72231322600227e-16	30.9720668621624
HLA-DPA1	2.62342247284889	-0.114403340721162	12.9985139626932	4.55781644820245e-18	4.02381281839278e-16	30.8902281276028
PCP4	-4.99736094750868	-0.791966177062788	-12.9953600114888	4.6027036682235e-18	4.04521924634585e-16	30.8804943599239
ARHGEF6	1.49516475356508	0.1520040550762	12.9877034948461	4.7135444565209e-18	4.12414097336398e-16	30.856859261537
KIF13B	-1.41308437790688	-0.0249741441685677	-12.9804935038408	4.82039326515059e-18	4.19888389349717e-16	30.8345954949216
GNB4	2.33416501915152	-0.399198757946781	12.9722021039334	4.94630642891354e-18	4.28949821682639e-16	30.8089839744647
LPPR1	-2.52339212938504	-0.346104216401921	-12.9701944399917	4.97729278024457e-18	4.29735511894332e-16	30.8027810871335
DUSP4	3.44415454135608	-0.704571987387612	12.9597277744004	5.14205038430898e-18	4.42013357377507e-16	30.770434629907
SORD	-2.1934190490866	0.214017203848502	-12.9519086797493	5.26872948398642e-18	4.5092501815131e-16	30.7462608755352
FUT11	2.3868419448687	0.134974097786562	12.9447657377287	5.3872167463698e-18	4.59061134835225e-16	30.7241704939287
TSPAN4	1.28484006027544	-0.109578381856268	12.9409726580517	5.4512303300021e-18	4.62505035661087e-16	30.7124372192135
LPCAT1	3.30361305281123	0.0721318506900418	12.9369266832806	5.5203617207302e-18	4.66351592088755e-16	30.6999195647275
INSIG2	1.85226824379649	-0.100032929471857	12.9328594355875	5.5907520708519e-18	4.70271029341744e-16	30.6873339204283
IKBIP	2.59316490833685	-0.140119051860266	12.904994827615	6.09809018206189e-18	5.10754143069363e-16	30.6010513596219
FAM57A	2.60845735681458	-0.105596328992548	12.8751514039273	6.69336287147421e-18	5.58226463480949e-16	30.5085278883823
SH2B3	1.85114389237981	-0.0482319001382	12.8706042522041	6.78909757593471e-18	5.6381153979129e-16	30.4944200586293
SCNN1A	-1.96251442406018	-0.348842612905924	-12.867320143192	6.85910225803408e-18	5.67221709515654e-16	30.4842292041073
PLEK	2.72364597759797	-0.284757016161333	12.8626346135788	6.96024799934658e-18	5.73167649324343e-16	30.4696871664783
ISG20	3.50760687574814	0.509109459264848	12.8525190419922	7.18379501535606e-18	5.89101248978927e-16	30.4382825455804
HLA-B	1.50420363057082	-0.132362210408448	12.8459232832618	7.33346129708261e-18	5.98868783173009e-16	30.4177982035634
NMI	1.76674445121169	-0.128096876880054	12.8412609821996	7.44115723218566e-18	6.05142077151896e-16	30.403315108532
TMEM45A	3.92914220135366	0.257088729733141	12.834587700215	7.59810008835407e-18	6.1535191583327e-16	30.3825800604882
AKIP1	1.08602059886561	-0.0227220125153959	12.8173853392807	8.01831231749393e-18	6.44974662471534e-16	30.3291022438644
RCN1	2.03039781219181	-0.170969276710869	12.8169325228512	8.02968608822155e-18	6.44974662471534e-16	30.3276940240882
ASS1	-2.67209628348147	0.130209834919354	-12.809554284124	8.21733164783295e-18	6.57352991697461e-16	30.3047445310951
IGSF11	-4.74384913178414	-0.169651754990572	-12.7975804581915	8.53135827043718e-18	6.79699555863001e-16	30.2674855019214
COLGALT1	1.57597746823289	-0.029444231791846	12.7859090923726	8.84915540111155e-18	7.01103098211592e-16	30.2311494342762
BPHL	-2.00864549683551	0.211066254181387	-12.7851026068682	8.87155305660875e-18	7.01103098211592e-16	30.2286379663986
RAPGEF3	-2.28562644235572	-0.0265130999689413	-12.781191832922	8.98097999428066e-18	7.06900509670308e-16	30.2164582500097
SCN2A	-3.15984110949455	-0.165685944645837	-12.7657613672469	9.42624844626052e-18	7.3898017319304e-16	30.1683819094284
EMP3	2.01550875399235	0.146410912922855	12.7596412594776	9.60898900188848e-18	7.50305081466185e-16	30.1493049307768
DAO	-3.55725207191579	-0.180936891333826	-12.7405573159383	1.02021924845824e-17	7.93463375021151e-16	30.0897866612895
PCGF1	1.22601359270804	0.0361234382337748	12.7184437833895	1.09361582328518e-17	8.47184842710128e-16	30.0207597082679
TLR2	2.76793826516299	-0.144579694873102	12.71451685214	1.10719844769884e-17	8.54330014820849e-16	30.0084951218224
BHLHE41	2.76709860186103	-0.0571305681888994	12.7044598480507	1.14276856477456e-17	8.78318474549674e-16	29.9770758184382
MSR1	3.01938121430919	-0.331071552315206	12.6889617618624	1.19986378829329e-17	9.1859884323282e-16	29.9286317736098
RPS3	1.08855309595258	-0.034495720454451	12.6798279139816	1.23485793247933e-17	9.41711308119158e-16	29.9000662675335
RNF149	1.53489546983291	0.0678080326853353	12.6704721686592	1.27177471947693e-17	9.66105144458461e-16	29.8707953740783
GNB2	1.0650757191629	0.00626009671130973	12.6670424937739	1.28558620431839e-17	9.72826409978226e-16	29.8600622124051
SACS	1.83916956652322	-0.057463637046714	12.6355199203472	1.41986709665164e-17	1.0703067395106e-15	29.7613396452182
NCKAP1L	2.41985610174814	-0.244356197065488	12.6258266693635	1.46395081124074e-17	1.09930927009606e-15	29.7309558964604
LCP1	2.16133504318998	-0.122829861910926	12.6087055840752	1.54523129953765e-17	1.15591558166559e-15	29.6772591004886
TYRP1	-4.80574718489843	-0.134712003229143	-12.6064052068498	1.5564950951678e-17	1.15991434867656e-15	29.670041486651
TNNC1	-4.49110595757607	-0.270382060307481	-12.6010896093386	1.58284210864392e-17	1.16922125207068e-15	29.6533607103144
CLEC7A	2.29492205226131	-0.169547304649144	12.6008584286169	1.58399816332719e-17	1.16922125207068e-15	29.6526351617977
LDHD	-3.48001142275993	-0.145080673164976	-12.5990945419703	1.59284695292041e-17	1.16922125207068e-15	29.6470990641617
HPD	-6.05363758341551	-0.0634974698565323	-12.5964564458075	1.60617487802092e-17	1.17460527740045e-15	29.6388184242398
MLKL	1.89790464272106	-0.0660793674954853	12.58953716521	1.64167099566239e-17	1.19610073769469e-15	29.6170953388634
ADH6	-3.60880909444629	-0.117009708183982	-12.5874493490837	1.65253683155935e-17	1.19757255499393e-15	29.6105393974976
EFHD1	-3.04038763451292	-0.458096092721381	-12.5868036866223	1.65591184449897e-17	1.19757255499393e-15	29.6085118393986
RP11-728F11.4	-2.92678810329833	-0.349689115058594	-12.5787498105562	1.69860259206191e-17	1.2239305956552e-15	29.5832158231244
FAM3B	-3.76882504979395	-0.74223875214996	-12.5773426438194	1.70617510238413e-17	1.22488373009621e-15	29.5787952446447
ADA	2.77440227942197	-0.422089024334373	12.563421482184	1.78295803475363e-17	1.27533556653783e-15	29.5350481825371
IGFBP3	3.82177094918169	0.223908894333498	12.5525061908771	1.84560325765187e-17	1.31534466351705e-15	29.5007291302414
SFRP1	-3.39300185603926	-0.423804616499953	-12.5230171631223	2.02622910282085e-17	1.43364852657711e-15	29.4079332504876
BAZ1A	1.67189309875457	-0.181264516028689	12.4999074698129	2.18022116672536e-17	1.53705592254138e-15	29.3351315739851
PCK2	-2.68557946618788	0.740569224446914	-12.462279345254	2.45675609597621e-17	1.71829186104579e-15	29.2164421113791
PYCARD	2.92779593641658	-0.240590446148454	12.4613118704185	2.46431671360551e-17	1.71829186104579e-15	29.213387964613
SLC43A3	2.40213379138038	-0.0721214005141391	12.4602856223795	2.47236238999395e-17	1.71829186104579e-15	29.2101481461944
TRIB3	3.55688885295527	0.160878334423322	12.448347183678	2.56793680843505e-17	1.77840966461196e-15	29.1724488214144
FBP1	-2.84074495536915	0.000199822138998821	-12.4457121323801	2.58953121392986e-17	1.78705007964125e-15	29.1641252945302
MIOX	-3.92982171139757	0.0138616964285714	-12.4434798645912	2.60796862633323e-17	1.79345884587737e-15	29.1570733518647
CXCL16	1.94681233905702	-0.228421449727746	12.4341304878797	2.68664565660516e-17	1.83654524190677e-15	29.1275306497437
PLCD1	-1.00169587194005	-0.010324049443889	-12.4338124168869	2.68936417382133e-17	1.83654524190677e-15	29.1265253876428
CENPH	2.3698110753576	-0.196215171694625	12.4271789401878	2.74669903497247e-17	1.86918591619533e-15	29.1055572675573
PRKCDBP	2.44843235768371	0.301990245583076	12.4194106575435	2.8154183643231e-17	1.90932126374977e-15	29.0809946933073
DEGS1	1.84176574085606	-0.0546864872535522	12.4115916208502	2.88634559306525e-17	1.9506719751202e-15	29.0562635958894
DTX3L	1.67236275254947	-0.0533700094391145	12.4084628253302	2.91523168762198e-17	1.96342356858087e-15	29.0463651613954
FAM222A	-1.73924356580652	0.119838164630508	-12.4060349150013	2.93784858144194e-17	1.97187994341372e-15	29.0386831965908
CXCL10	3.54882893151843	-0.0128408638643159	12.3937183793006	3.05534891026129e-17	2.04374687004133e-15	28.9997014065258
GPR110	-3.0950595022152	-0.54173885724185	-12.3921363623434	3.07078247366152e-17	2.04708386739089e-15	28.9946928776902
PFKFB2	-1.84985558925049	0.0829136681987884	-12.3844728799678	3.14666957079978e-17	2.09056192942728e-15	28.9704262799071
CORO1C	1.71912220571229	-0.16635475630606	12.3729438411553	3.26442912626485e-17	2.16147116370489e-15	28.9339047054799
PTTG1	2.34793459191183	0.13110997505566	12.3546391802546	3.46063693095876e-17	2.28367081514683e-15	28.8758833501892
SEC61G	1.59031258226816	0.0781275082903208	12.3532991912702	3.4754610687541e-17	2.2857570968628e-15	28.8716341718677
IKZF1	1.27879723747201	-0.131846671995206	12.3514325656323	3.49621857358646e-17	2.29171865631174e-15	28.8657146050291
AIDA	1.20806524562377	-0.121398835345344	12.3453613277736	3.56460508236971e-17	2.32875650031213e-15	28.8464579139918
CORO1A	3.41108924175266	-0.478546725845859	12.3376821574119	3.65304748012062e-17	2.37860722800279e-15	28.8220942327393
ENTPD5	-2.09818435740275	0.290281976254248	-12.3222529872331	3.83752535893056e-17	2.49045230164503e-15	28.7731186294507
VAV1	3.96012943329107	-0.752310955374753	12.3141541153102	3.93810652328047e-17	2.54729207094963e-15	28.7473984469462
FAM151A	-5.17010236589532	0.0285974265197943	-12.3115164706444	3.97143686952621e-17	2.55756475482366e-15	28.7390200171146
ATP6V1B1	-2.70377462791749	-0.144470766838663	-12.3108355939407	3.98008699536312e-17	2.55756475482366e-15	28.736857075741
RNASE6	3.4819894698624	-0.137793863089368	12.3053585533026	4.05036714159282e-17	2.59422044470842e-15	28.7194559334317
TCF21	-3.68783491545313	-0.603227729650158	-12.29965724955	4.12486049976428e-17	2.63332706628274e-15	28.7013380799647
SHMT2	1.71312722992819	-0.0312450627310723	12.2923965508903	4.22174127173329e-17	2.68642555794483e-15	28.6782585060259
SLC28A2	-2.75090269573375	0.0568734386847127	-12.2911139561859	4.23909312145255e-17	2.68873741383005e-15	28.6741808011742
LCP2	1.79409509168449	-0.295674726922383	12.264889984396	4.61014443430018e-17	2.91006254913841e-15	28.5907603529576
ANXA9	-2.95968472228092	-0.301423975503663	-12.2643762616394	4.61773280668425e-17	2.91006254913841e-15	28.5891252561126
BMP7	-1.57333791666359	-0.209219700682392	-12.2621962662464	4.65007522614233e-17	2.91641397260893e-15	28.5821862945022
ZFAS1	1.5966802118848	0.0817256113371137	12.2616931359743	4.65757218953311e-17	2.91641397260893e-15	28.5805847334699
DPYSL2	1.65344604386686	-0.0198288677199999	12.2604699860516	4.67584899122084e-17	2.91853389741839e-15	28.5766910713254
RNF212B	-4.05683456369085	0.666975265975344	-12.2541752251517	4.77106287653269e-17	2.96850988308458e-15	28.5566497926935
CYP4F2	-4.84797806471614	0.392590602486251	-12.2520603015814	4.80349168263358e-17	2.97114118556857e-15	28.5499151201276
SH3BGRL3	1.58982282987712	0.0657735263821381	12.2445415467624	4.92059720158528e-17	3.03266618093931e-15	28.5259679423797
GNL2	1.04601850222684	0.0048473631177029	12.2355327040963	5.06472534259325e-17	3.11171009371427e-15	28.4972650309555
SIGLEC10	2.53095066331105	-0.426383208250083	12.2297581023623	5.15935137728186e-17	3.1599414888546e-15	28.4788610492908
SLC34A3	-2.87513061996836	0.319577793765704	-12.2286885871515	5.17707259228788e-17	3.16091731265577e-15	28.4754519614833
HECW1	-1.88322247386027	0.250053389960067	-12.2236489435114	5.26140950158822e-17	3.20243369011265e-15	28.459386030142
CAV2	2.37595853971883	-0.18542721101548	12.2168231840465	5.37785934214715e-17	3.26317849061121e-15	28.4376207842116
BOD1	1.31783705869318	0.0259811152569386	12.2077864094821	5.53605531446229e-17	3.34880086753538e-15	28.4087958450195
SLC5A2	-4.41197402498943	0.437147623406241	-12.2066887610453	5.55558876423765e-17	3.35027643662442e-15	28.4052939015369
RRM2	3.21644746678268	0.187305162432386	12.1992888839932	5.68910871464618e-17	3.42027121774081e-15	28.3816811505506
CASR	-2.26817563454707	-0.203864591394183	-12.1919971813428	5.82385556528979e-17	3.47993125683276e-15	28.3584065218287
BCAM	-1.67444552107717	-0.109704649539009	-12.1811222902303	6.03084685233878e-17	3.59266162489325e-15	28.3236815785878
CALU	1.62348205954435	-0.0502911272908448	12.1764546251754	6.12196065456589e-17	3.63588808693445e-15	28.3087723371005
CKLF	1.5149282279799	-0.187185565014887	12.172616452516	6.19792604711842e-17	3.66988376427413e-15	28.2965104716228
SLC22A6	-4.94473367246884	-0.225221769935049	-12.1690685455967	6.26899519378088e-17	3.70078424105155e-15	28.2851741961729
RNASEH2A	1.89502318016385	0.128815740856366	12.1639999809319	6.37195900701484e-17	3.7461076095654e-15	28.2689762371199
LHPP	-1.81128302109349	0.0898624211465618	-12.1634127207382	6.38399888563112e-17	3.7461076095654e-15	28.2670992707577
FN1	2.39217970827783	-0.373005599830191	12.1595793363116	6.46315800810805e-17	3.7812368298779e-15	28.254846117673
PLOD2	2.56469660920009	0.309486971886287	12.156033688421	6.53725993230592e-17	3.81320706587094e-15	28.2435109717955
CBFB	1.53548457262823	-0.173311019986957	12.1547789489017	6.56368881280556e-17	3.8172622267708e-15	28.2394992756599
MTTP	-3.91311728495196	-0.248541208002067	-12.1402576052362	6.87754244341751e-17	3.98795722924674e-15	28.1930560528218
CCR5	3.47285400505744	-0.281820262369842	12.1373972160836	6.94113406241735e-17	4.01295830351969e-15	28.1839044733664
CCL5	3.68435277187925	-0.0911217031144398	12.1360556635307	6.97116395564457e-17	4.01846595196112e-15	28.1796119153375
PLK2	2.98997052494113	-0.0268509614217247	12.1344976900115	7.00620343502805e-17	4.02682056079516e-15	28.17462657896
TUBA1B	1.09791604151693	-0.107407757987256	12.1186148672265	7.37375248113089e-17	4.22567762800247e-15	28.1237851331626
FANCI	1.56366712282909	-0.0246680243207647	12.1004465231655	7.81820514719771e-17	4.46731786238857e-15	28.0655869358145
SHFM1	1.52019576670114	0.0427281123537766	12.0982110937249	7.87473278216729e-17	4.48653743597955e-15	28.0584232394196
PNPLA3	-2.78783993850331	0.144432779468641	-12.0861915474192	8.18584425910235e-17	4.6502713517144e-15	28.0198939161217
CLIC2	2.02208864300096	-0.0808989002990866	12.0818353298411	8.30164735627738e-17	4.70242735652256e-15	28.0059251250707
MYC	3.08962451741101	-0.579504006116746	12.0730148137857	8.54123169992425e-17	4.81859163768794e-15	27.9776333209769
HSD11B2	-4.26793723791433	-0.618154445110178	-12.0566205641222	9.00529511096729e-17	5.05715698796126e-15	27.9250215762749
EGF	-4.42434217795426	0.704538883206137	-12.0267983277107	9.91594230379346e-17	5.55264437748709e-15	27.8292266605255
TMEM44	2.09671121787401	-0.0413248374328663	12.0124838439128	1.03856261218356e-16	5.79908508153435e-15	27.7832041779004
PDK1	2.86385189592725	-0.245336702430849	12.0104962828412	1.04525989169402e-16	5.81990017537246e-15	27.7768118428596
NRK	-3.12394207998732	0.00643689076148213	-12.0058018787771	1.06125225103366e-16	5.89127887210781e-15	27.7617117783267
PLEKHO2	1.30492399331171	-0.0114950554480242	12.0049759662837	1.06409139278849e-16	5.89127887210781e-15	27.7590548407974
REEP6	-3.28200545797151	-0.110127179351098	-11.9994642252642	1.08323635501203e-16	5.95883474406433e-15	27.7413214280053
NPHS2	-6.24423190526086	-0.590953454626303	-11.9988433874532	1.08541456382007e-16	5.95883474406433e-15	27.7393237013515
AP1M2	-2.09682163091716	-0.142256485101437	-11.9962879616126	1.09442705853936e-16	5.98051623892913e-15	27.7311003404517
TLR7	3.01735649387471	-0.363713676521128	11.995994529612	1.09546677370047e-16	5.98051623892913e-15	27.7301560212916
ACPP	-3.11036427720475	-0.276297385559358	-11.9867546716971	1.12872284286045e-16	6.14495527700612e-15	27.7004146405792
ALAD	-1.77516456872054	0.211568201251873	-11.9857302190401	1.13247243768817e-16	6.14829011253475e-15	27.6971164276571
CLIC1	1.37353680070063	-0.120481085672474	11.9797094454487	1.15476527877441e-16	6.24841096676933e-15	27.6777298339217
GIMAP2	2.50146758664412	-0.0480109738658777	11.9790349379925	1.15729026018535e-16	6.24841096676933e-15	27.6755576566048
GALM	-1.61824771566728	0.223898699099276	-11.9667906028021	1.20411040455605e-16	6.48334060958628e-15	27.6361157294519
MPPED2	-2.40617169570013	-0.226003784488748	-11.964253708022	1.21404836027914e-16	6.5189407707153e-15	27.6279413233266
CALHM2	1.55331119480946	-0.155827262286325	11.9602340838945	1.22996500930032e-16	6.58636180799919e-15	27.614987522441
SLC26A4	-3.37509212753592	0.636887779744294	-11.9556495110208	1.24837675653507e-16	6.66674006848252e-15	27.6002105054651
C3AR1	2.65180400639425	-0.263980558616063	11.9547394668501	1.25206457125328e-16	6.66826454673722e-15	27.597276918526
FXYD4	-5.60633520672036	0.151208241516096	-11.9516515002456	1.26466047858124e-16	6.71709504599291e-15	27.5873218456673
SUCNR1	-3.2609987212507	-0.321516690330903	-11.9425751496686	1.30243080516897e-16	6.89901117581258e-15	27.5580540065333
CLEC4A	3.27789517018382	-0.527080682847416	11.9359011438709	1.33093083210811e-16	7.03097395646547e-15	27.5365259326994
C19orf10	1.20354816891473	0.127295588249737	11.9338896608379	1.33964366625287e-16	7.05797747712096e-15	27.5300364257745
ECHS1	-1.50931025721341	0.163337731746085	-11.9292769903692	1.35984231576116e-16	7.14518754600617e-15	27.5151528849579
NICN1	-1.28270874145393	-0.159143286858502	-11.9276725520063	1.36694010301093e-16	7.16327782858591e-15	27.5099752458942
BTN3A3	1.67323552217814	-0.0626390869907336	11.9188759351232	1.4065267841352e-16	7.35107158460423e-15	27.481581922061
VCAN	3.97865746269489	-0.181325539397835	11.9089289912701	1.45269044162393e-16	7.55206365129641e-15	27.4494633946213
AZGP1	-3.65420898190751	-0.241538438192417	-11.9046272997194	1.47312677718591e-16	7.63804542488537e-15	27.4355692793026
PWAR6	-1.87298348134956	-0.109822147357594	-11.900765795456	1.49171966372761e-16	7.71404055129221e-15	27.4230948661022
RAB25	-4.21366141511399	-1.03205497216792	-11.8959544449129	1.51521875148199e-16	7.80892858138941e-15	27.407549281666
SLC48A1	-1.23741753110404	-0.0376321638471038	-11.8951331717171	1.51926720562902e-16	7.80892858138941e-15	27.4048954257415
DNMT1	1.36272715874239	0.0765759459736105	11.8938613641357	1.52555817925897e-16	7.80892858138941e-15	27.4007855419167
CYP2B6	-2.5749822335087	0.220604915897045	-11.8937709833055	1.52600624862092e-16	7.80892858138941e-15	27.4004934655185
RMST	-2.23438760550778	-0.367214870165892	-11.8866927630511	1.56151396034429e-16	7.96982086166345e-15	27.3776160286743
MUC15	-5.25597482241183	-0.459630902051341	-11.8819290760501	1.58588058441144e-16	8.07316196724149e-15	27.3622156710324
FCGR2C	2.53954909108786	-0.506687952900465	11.8775702122898	1.6085136029156e-16	8.16716531179866e-15	27.3481214459801
LZTS3	-2.4171346629092	-0.314877763618593	-11.8705945003104	1.64541674869173e-16	8.33295164279306e-15	27.325560556963
GSTM3	-2.46584796263032	-0.0618667757349488	-11.8571999247598	1.71869767771359e-16	8.68163808904863e-15	27.2822218626348
SLC47A2	-4.82663236212639	-0.409308431459699	-11.8470170504286	1.77661097084602e-16	8.95110499167381e-15	27.2492590302388
MCM5	1.78185413782665	-0.000509263927178599	11.8446308350916	1.79046543261031e-16	8.99777743941781e-15	27.2415326833273
RGS1	4.26641626147623	-0.530267722964802	11.8381328551735	1.82874988959329e-16	9.16666728545749e-15	27.2204890384266
ALS2CL	-2.00415556677564	0.0949841058767621	-11.8275075353068	1.89314536552672e-16	9.46524388238727e-15	27.1860671302735
FAM169A	-2.5334058857893	-0.371122764843535	-11.8240720450699	1.9144536402831e-16	9.54742414654157e-15	27.1749343143002
ERO1L	1.85844005148697	0.0791878918383967	11.8227940226268	1.92244224813933e-16	9.56293036073167e-15	27.1707924473887
CXorf38	1.1101271140355	0.0415263962351546	11.8197644211126	1.94151460410627e-16	9.63335309515918e-15	27.1609731378645
FREM1	-2.60606427699088	-0.306178221337033	-11.7909878074057	2.13250265668378e-16	1.05442117917904e-14	27.0676447171545
IYD	-4.17371472525204	-0.317285361314033	-11.7905070722688	2.13584982975702e-16	1.05442117917904e-14	27.0660846750652
SH3GL2	-4.64260839186823	-0.474904557655732	-11.787424495622	2.15743934617404e-16	1.06240336044384e-14	27.0560806327431
S100A2	-3.53426604847609	-0.0749836223525406	-11.7802616164188	2.20846304228855e-16	1.08480368836625e-14	27.0328297785669
SNRPB	1.12403670847264	-0.0444309645079916	11.7780887892679	2.22418099422035e-16	1.08979308264312e-14	27.0257754102963
SLC2A12	-2.55391037230398	-0.0610877488574049	-11.7769839551305	2.2322165933238e-16	1.09100281826816e-14	27.0221881846305
DARS	1.42476031424505	0.0953305082777799	11.7697198280492	2.2857862319627e-16	1.11440607861286e-14	26.9985987125174
PEPD	-2.39125401281267	0.296804893329776	-11.767325791624	2.30372474736504e-16	1.12036479711185e-14	26.9908228250397
DAGLB	1.08323226944653	-0.0658782393001476	11.7658498219166	2.31485511774013e-16	1.12299122407398e-14	26.9860284668377
FUT6	-2.19512723628134	-0.283374512142505	-11.7612503028543	2.34989064101675e-16	1.1371730042787e-14	26.9710861292883
SLC4A11	-2.01175294902726	-0.0639093330066342	-11.7542129440376	2.40453740487865e-16	1.16075193591667e-14	26.9482186937266
ANXA5	1.2326543617547	-0.200059102817588	11.7454762817706	2.47417297584515e-16	1.19143282932651e-14	26.9198204789117
CAPN3	-2.7283570157967	-0.239387449413567	-11.7428016470453	2.4958965588391e-16	1.19747378583461e-14	26.9111246785666
ARPC1B	2.14161750812756	-0.230194967316338	11.7419964562519	2.50247410539927e-16	1.19747378583461e-14	26.9085066508348
BTD	-1.0447835451621	0.0867934875727905	-11.7416820212952	2.50504746258581e-16	1.19747378583461e-14	26.907484262156
ESRRG	-3.46054867487614	-0.645573686785303	-11.7368915277786	2.54458605268316e-16	1.21341464833424e-14	26.8919063231986
BIRC3	2.47579812424754	-0.186930789712424	11.7334610934137	2.57328685260679e-16	1.22412254913205e-14	26.8807492430633
NKG7	4.74049703167559	-0.543885043821029	11.7252784668539	2.64307689931848e-16	1.25427758231823e-14	26.8541300176191
TCL6	-2.2817975759581	0.190621202423173	-11.7219835823375	2.67171728915617e-16	1.2648064529027e-14	26.8434088297411
STK10	2.30506719735393	-0.336683087956381	11.7094997858272	2.78311032338267e-16	1.31436576452956e-14	26.8027750865467
PAK6	-2.502256689942	-0.217952539286301	-11.6886788970411	2.97945577454519e-16	1.40034421403624e-14	26.7349595390836
MPEG1	2.55627344254837	-0.27394778301693	11.6770082530493	3.09558481472301e-16	1.45144418142958e-14	26.6969224479629
CASP3	1.21945808837663	0.0395386325927011	11.6762177742068	3.10361417744071e-16	1.45173590128068e-14	26.6943454684086
CHST11	2.12416649332505	-0.193554247120401	11.6720273650157	3.14653198546568e-16	1.46830667578909e-14	26.68068327563
UQCRC1	-1.08729867045748	-0.0710339912791535	-11.669672932809	3.17090888630587e-16	1.47616729840163e-14	26.6730060025538
HILPDA	4.3625644616121	0.639893855239312	11.6635571799191	3.23512585117108e-16	1.50225117853894e-14	26.6530605338518
CSF2RB	1.97557877195044	-0.338331987936558	11.6628845278514	3.24226873065959e-16	1.50225117853894e-14	26.6508664980738
PML	1.44453822819018	-0.335142609923412	11.6516821387663	3.36360066233904e-16	1.55255583612936e-14	26.6143182230705
NPM1	1.01359830548324	0.053236949945754	11.6509581761093	3.37159809805823e-16	1.55255583612936e-14	26.6119557013443
HLA-F	1.75508195265472	-0.0407264629321	11.6477933798372	3.40678534698812e-16	1.5636905390075e-14	26.6016271571238
LILRB2	3.04898459090589	-0.684414528696464	11.6395732160482	3.4999259817465e-16	1.60268806813667e-14	26.574793955938
RRN3	1.24218580837031	-0.083995590446546	11.6380518694557	3.51744452123846e-16	1.60695559840915e-14	26.569826836862
PARVG	2.57207942244854	-0.348691952712752	11.6369035546585	3.53072628317664e-16	1.60927219590649e-14	26.5660774479751
CLEC2B	3.34181789473409	-0.657314180538704	11.6309614299461	3.60026986114314e-16	1.63092429637603e-14	26.5466729377172
HAO2	-3.82837812909046	-0.372019911438722	-11.630714030741	3.60319516470648e-16	1.63092429637603e-14	26.5458649350241
SLC27A3	1.74405206882327	-0.0244941344005887	11.6167102393604	3.77276133779002e-16	1.70374077095269e-14	26.5001157391148
NQO2	-1.8880104291666	0.272800701797329	-11.6022190816627	3.95673901071747e-16	1.78271558324257e-14	26.4527474916124
MCOLN3	-2.36318212233279	-0.343825089806027	-11.5991010705586	3.99749709330344e-16	1.79694829201042e-14	26.4425518622647
TMEM173	1.42389344548347	-0.0771681111903588	11.5971233773661	4.02356906820584e-16	1.80452929445689e-14	26.436084319515
RALGAPA2	-1.3915393008087	0.107183794294648	-11.594149905866	4.06309260868193e-16	1.81809479537802e-14	26.4263593797206
PPP1R13L	1.47645186523628	-0.031513001070521	11.5920339314557	4.09145728708723e-16	1.82661665990029e-14	26.4194382420169
NINL	-1.83496466438609	-0.059637806915974	-11.5687482323267	4.41715857572753e-16	1.96754297558372e-14	26.3432346368681
UMOD	-5.39021510316873	-0.864506144175002	-11.5605678687902	4.53770494791454e-16	2.01665485882488e-14	26.3164472678712
FMNL3	1.46433933138443	-0.0984762812001033	11.5590452022797	4.5605078712525e-16	2.02220347892936e-14	26.3114601937864
APEH	-1.13156701666358	-0.0381083056112711	-11.5545884065784	4.62791984572118e-16	2.04746277779434e-14	26.2968614585518
RPS21	1.43587333679829	-0.0220556816346355	11.5520593969631	4.666620259775e-16	2.059934470075e-14	26.2885762562254
PHYHD1	-2.82715576985617	-0.500309833026728	-11.5499814483695	4.69866321428539e-16	2.06941798509616e-14	26.2817681380748
PLCL1	-2.26139195809101	-0.25172778029714	-11.5438027215655	4.79526338496196e-16	2.10260679141682e-14	26.2615210619763
NOL3	2.34562146782037	0.350567089889944	11.5437892957369	4.79547546182621e-16	2.10260679141682e-14	26.261477061469
TBC1D13	-1.74188973297813	0.225699171325521	-11.5406460709492	4.84538852281442e-16	2.1197493227375e-14	26.2511751177894
ATAD2	2.34125620978791	-0.419953179446704	11.5354979319041	4.92827692406027e-16	2.15114752791114e-14	26.2342992821409
TRPM3	-1.86247688295412	-0.283604762418404	-11.5348315101928	4.93911111566922e-16	2.15114752791114e-14	26.2321144698161
CDC6	2.61412261487711	-0.341154106882701	11.5308749071072	5.00393273917469e-16	2.17454717860498e-14	26.2191418642189
HYKK	-1.95078804968269	0.10433333779335	-11.5293528612023	5.02909729282854e-16	2.1806477398705e-14	26.2141509563319
SPAG4	3.74064223708049	0.139015546005143	11.5248708389945	5.1039464252405e-16	2.20821735073485e-14	26.1994523085103
CLIC5	-2.74421062925589	-0.390438507399385	-11.5204504511794	5.17887032049729e-16	2.23569778439265e-14	26.1849532365096
KIAA1715	1.32103419532575	-0.0460389675219381	11.5195584252334	5.19412424257939e-16	2.23735474791898e-14	26.1820270437547
PHLDA3	1.45225565724073	0.100529456851909	11.5178869830411	5.22282892248486e-16	2.24478561517063e-14	26.176543784122
CYP27B1	-3.63587453183148	0.414235031894418	-11.5161284910756	5.25320183807129e-16	2.25289940534703e-14	26.1707745617658
CTSH	-1.49238222265848	0.0996721078100585	-11.509676320533	5.36618359850104e-16	2.29632821718388e-14	26.1496029859162
TRIM22	2.07823938035655	-0.133108011844592	11.5057959832268	5.43531154840815e-16	2.3208425062582e-14	26.136867794959
FUT3	-2.43711793869592	-0.389056805254041	-11.4899514234029	5.72706064939172e-16	2.42953813132962e-14	26.0848460087149
EPN3	-2.97177616898859	-0.243342618782126	-11.4848877063051	5.82360199117742e-16	2.46398076015825e-14	26.0682136581103
TAPBP	1.64828780714211	-0.152491029812869	11.4843788059807	5.8333949319528e-16	2.46398076015825e-14	26.0665419338777
FGF1	-4.00482490868906	-0.188344068619682	-11.4778303621677	5.96090554527382e-16	2.51242554369509e-14	26.0450274751588
COPG2IT1	-1.86141543923758	0.237539536738635	-11.4736529676767	6.04371690745408e-16	2.54186282551915e-14	26.0313000340843
CPEB4	-1.04930823061277	0.00159169668877925	-11.4678253282238	6.16119053093613e-16	2.58019600888498e-14	26.0121459076847
P4HB	1.44009492667445	0.0469061368846678	11.4572069104512	6.38120953015099e-16	2.66663807209871e-14	25.9772342818263
ACSS2	-1.3622636671128	0.0520578766319151	-11.4561123429158	6.40433676250959e-16	2.6706084299665e-14	25.9736346928877
TMEM192	-1.14783153782115	0.0935794460827634	-11.4513917804827	6.50505348605794e-16	2.7068480525106e-14	25.9581089010837
TAGAP	1.57608128813063	-0.19187495158472	11.4456166428878	6.63045265114141e-16	2.75318308283306e-14	25.9391107226382
GLRX5	-1.1389782521018	0.126962831452068	-11.4431039244964	6.68577370722437e-16	2.77028496591735e-14	25.9308434133954
PIK3C2G	-3.08922753582175	-0.132920732055481	-11.439879541913	6.7574477206484e-16	2.78819406056817e-14	25.9202334011946
SLC52A3	-2.22216555763691	0.00843818783385213	-11.4321443865838	6.9325763072839e-16	2.85444460181633e-14	25.8947749583765
PIPOX	-3.16807297244956	-0.370035331850308	-11.4266395199562	7.06000010399918e-16	2.90081639493249e-14	25.8766522760538
ARHGDIB	1.53396912679735	-0.0607927425806032	11.416986952734	7.28918056317294e-16	2.98871652421813e-14	25.8448654137896
SASH3	1.61000343477261	0.10293451352313	11.4085911972812	7.49463402900218e-16	3.06654138485206e-14	25.8172075721981
AXL	2.00303697675188	0.0351301748038286	11.398666127869	7.74508299255177e-16	3.16222150228693e-14	25.7845000278213
IFNGR2	1.29592712972257	0.00200699380547337	11.3980562606069	7.76074566355434e-16	3.16222150228693e-14	25.7824898277053
PDLIM1	1.87020746973913	-0.117141885962595	11.3966300682278	7.79749847102079e-16	3.16404083920365e-14	25.7777887287466
DUSP9	-3.19072635832434	0.320137763371521	-11.38539155873	8.09334299785648e-16	3.27730226064027e-14	25.7407345128459
NPHS1	-4.58103114457124	-0.0629626655902858	-11.3816377620022	8.19466788223533e-16	3.31149063554495e-14	25.7283543314891
ITGAM	1.90418929552552	-0.0469102045430531	11.3798703272826	8.24281900530855e-16	3.32409484948647e-14	25.7225246273625
PLEKHO1	2.56279873220673	-0.109598203652035	11.3764737537232	8.33615862061502e-16	3.34795845912774e-14	25.7113202432454
PRRG2	-1.91509390654792	-0.154716206211195	-11.3725701315855	8.44475361913747e-16	3.38463652722853e-14	25.6984414050638
SUSD2	-3.30946882251162	0.10619143980552	-11.362759768318	8.72402913356653e-16	3.48940443246406e-14	25.6660663640921
PFKP	1.82444165523558	-0.0742935737100466	11.3621476816326	8.74176017317135e-16	3.48940443246406e-14	25.6640460144529
LDLRAD3	2.14706749203788	0.0719709399468053	11.3527815453127	9.01767224859419e-16	3.59222273171133e-14	25.6331246512302
C1orf216	1.45692924819099	-0.0305387195987362	11.3476613072156	9.17221409277761e-16	3.6426181810567e-14	25.6162159202236
SLC16A10	-2.20315859765368	0.00583593025764301	-11.3473612568806	9.18135303557329e-16	3.6426181810567e-14	25.615224949406
SCD	3.27457464197661	0.0441932915962243	11.3464832590938	9.20814806469689e-16	3.64586856404029e-14	25.6123251354006
LPAR5	2.60406129862761	-0.313950742092289	11.3406229604856	9.38903210151686e-16	3.70735578309529e-14	25.5929674468655
TLR4	1.91812895193482	-0.123411433693176	11.3402304601315	9.40127467829155e-16	3.70735578309529e-14	25.5916707850748
GLDC	-2.80309462809359	-0.0781964919842444	-11.3305802991741	9.70740786650275e-16	3.80086871062453e-14	25.5597843358745
HLA-DMB	2.16672639290464	0.101406100268588	11.330503448344	9.70988586013905e-16	3.80086871062453e-14	25.559530354184
HLA-E	1.41708169244361	0.0483006724278146	11.3303144850976	9.71598155019588e-16	3.80086871062453e-14	25.5589058527573
NUP85	1.13243776201722	-0.0275083360340863	11.328809212101	9.76467798835563e-16	3.81229113214178e-14	25.553930937527
MCAM	2.39898892560965	-0.00484148899978227	11.3282114895925	9.7840830627446e-16	3.81229113214178e-14	25.5519553885578
ALB	-3.56310975064301	0.247295196265561	-11.3258530456794	9.86103135782885e-16	3.83464987266047e-14	25.544159982826
CPNE2	1.54842269081079	-0.00306812885965532	11.3206143784253	1.00341491877234e-15	3.89424336495427e-14	25.5268419653278
IFNGR1	1.10497057711252	-0.0596536814574315	11.3156509059999	1.02010086896536e-15	3.95117725906168e-14	25.5104304327172
RNF166	1.30977322637524	-0.0693297458775815	11.3078139322215	1.04702020373204e-15	4.04744555679372e-14	25.4845113291689
SLC12A6	-1.57864574233459	0.156061750292976	-11.3041896832243	1.05971107227939e-15	4.08844041448891e-14	25.4725222365977
RP11-369C8.1	-3.88279507929837	0.133227489437646	-11.3028030375254	1.06460767998856e-15	4.09328765540152e-14	25.4679347367962
C5	-1.62142632268906	0.0878198258392249	-11.3026514108948	1.06514449933914e-15	4.09328765540152e-14	25.4674330888869
ECI2	-1.38558895214489	0.175165905138223	-11.2961734651689	1.08833659694664e-15	4.17422875999163e-14	25.4459984227673
RP11-61L19.2	-2.96049990886517	0.142904226293205	-11.2890882774238	1.11428809115888e-15	4.26541646457477e-14	25.4225483017668
TSPO	1.5874281036765	0.0354709604011106	11.284273634224	1.13227942015042e-15	4.32583710634076e-14	25.4066094119713
SYNE4	-2.79806808691709	-0.650609399618144	-11.2811182566389	1.14422951902288e-15	4.36298722632868e-14	25.3961619115084
ABHD14B	-1.32752195619952	0.127110902388877	-11.2782269492707	1.15529150311212e-15	4.39661323679505e-14	25.3865876294038
SERPINH1	2.12667718426236	-0.0793303572410701	11.2762050045513	1.16309156662913e-15	4.41771930510935e-14	25.3798915194175
SLAMF8	2.48266591378984	0.107745115229271	11.2707045050081	1.1845814977834e-15	4.49064076886981e-14	25.3616727636026
NR3C1	1.19127229938598	0.0639302186795576	11.269463538839	1.18948510037919e-15	4.50052480353894e-14	25.3575618985593
PRDM1	1.86862154433174	-0.205333725169062	11.2546771716253	1.24951687383403e-15	4.71855129292355e-14	25.3085649001741
LILRB3	1.44984214595501	-0.235722344521131	11.241075312801	1.30744335822562e-15	4.92308761222716e-14	25.2634682136732
ACSBG2	-2.17877072239859	0.0547004916817958	-11.2407861589324	1.30870383487441e-15	4.92308761222716e-14	25.2625092726048
VOPP1	1.13919104067048	-0.0116956748495279	11.2399456141142	1.31237491291658e-15	4.92743983108279e-14	25.2597216546025
AP1S2	1.2897446354767	0.0150227987830299	11.2355681982809	1.33166230803522e-15	4.99029628588572e-14	25.2452027469636
CD300LF	3.92042106561707	-0.749117008400254	11.2239980223884	1.3840337356609e-15	5.17665595137749e-14	25.2068152536341
STAP1	-2.72695653390146	-0.106935674182922	-11.2126048335619	1.43764003082228e-15	5.36691561220684e-14	25.1689982272396
PPARA	-1.00058318861263	-0.0182134177862941	-11.2077523258583	1.46110479360167e-15	5.44414312733823e-14	25.152886420882
CTSV	-1.74508576111789	0.292320076956297	-11.2057161342985	1.47106600676316e-15	5.47085819099644e-14	25.1461247467732
SLC15A3	2.78702128104	-0.262836066827137	11.1858680558293	1.571836474581e-15	5.83454982297594e-14	25.0801865713956
PROC	-3.71030793436531	-0.742001575490482	-11.1833580992106	1.58506751546728e-15	5.87254030919532e-14	25.0718445495333
KCNK10	-2.35201065243517	-0.308019923676751	-11.175839639972	1.62537841879815e-15	6.01052672264623e-14	25.046851594586
HOGA1	-2.63143720276108	-0.793848402712713	-11.1749139922392	1.6304125232843e-15	6.01778814385102e-14	25.0437740460896
RDH12	-3.3038808443693	0.226442669795482	-11.1735956399595	1.63760957219396e-15	6.02296575346876e-14	25.0393906638543
DAK	-1.48984768168263	0.133339148292946	-11.1735313240721	1.63796150140255e-15	6.02296575346876e-14	25.0391768146396
NAP1L1	1.26813035317421	0.0581496607621196	11.1717584674638	1.64769254098053e-15	6.04740189338528e-14	25.0332818892167
ANK2	-2.44463465614513	-0.405508822280817	-11.170080465073	1.65695678827903e-15	6.07003665298705e-14	25.0277019940857
LRRC25	3.15819401257263	-0.864115146051198	11.1660817510603	1.67924658934409e-15	6.14021528070051e-14	25.0144035417492
TPX2	3.31764407860014	-0.307585047907591	11.1638717697386	1.69169541880466e-15	6.17421573801725e-14	25.0070529708118
C10orf10	2.69147253636588	0.132441022162933	11.1564805020996	1.73401256168579e-15	6.31689817778435e-14	24.9824645103856
PLCXD3	-3.68871411375175	-0.392612967122559	-11.1542448703431	1.74702187775331e-15	6.34951294115884e-14	24.9750258831181
ICAM1	1.84161780878884	-0.200452584304256	11.1538303441441	1.74944486362864e-15	6.34951294115884e-14	24.9736465582668
SOBP	-1.37288626746651	-0.168760350787033	-11.147768215372	1.78526994428771e-15	6.46756111609885e-14	24.9534724844436
RNASET2	1.93523817918193	0.0260500706771861	11.1470892095226	1.78932856254316e-15	6.47030451979398e-14	24.9512125386596
CEBPB	1.89766519044216	-0.101577888205339	11.1448700226386	1.80265849452888e-15	6.50650162693767e-14	24.9438259744764
TLR1	1.88144774740761	-0.355693929147827	11.1394812989922	1.83544633396753e-15	6.61266777563046e-14	24.9258869946134
SERTAD2	1.34701974680347	0.0379185072451895	11.1347263883885	1.86487830166579e-15	6.70637611639408e-14	24.9100548969931
FAM102B	1.34921355390552	-0.0522915955489592	11.1218707412099	1.94686446086191e-15	6.98838764989608e-14	24.8672359235731
OLFML2B	2.39291661233798	-0.177343449959496	11.1204920961906	1.95587035479485e-15	7.00787990559859e-14	24.862642750011
ADAM17	1.18712151841748	-0.0435501013356302	11.1188378867479	1.96673197203271e-15	7.03393794158195e-14	24.8571311708958
SCAP	-1.08524962692622	0.134282754733915	-11.1094700591795	2.02940259994882e-15	7.23499688245896e-14	24.8259123997277
HCST	1.71951414747389	0.0425382663236357	11.1093333021657	2.03033230539947e-15	7.23499688245896e-14	24.8254565672347
PROCR	1.65663011483124	0.0714484642291572	11.0904114038169	2.16321047607471e-15	7.69451218159497e-14	24.7623640052603
GATA3-AS1	-2.46177812840246	0.310852291902603	-11.082782292837	2.21924256188818e-15	7.87951720479104e-14	24.7369128796388
MTURN	-2.29882247543096	-0.0794544396150776	-11.0719156490205	2.3015968121491e-15	8.1424180363376e-14	24.700648413202
ADORA3	2.56794952570759	-0.0295996661209332	11.0702666834179	2.31436100976884e-15	8.17282187936208e-14	24.6951441299097
TNFRSF10B	2.10058498625922	-0.222472495242882	11.0585298642858	2.40730458478041e-15	8.48574866135093e-14	24.6559564080717
RAB11FIP3	-1.90257276826806	0.161941952985583	-11.0574167974834	2.41631256937654e-15	8.50221006233586e-14	24.6522391152003
HAUS6	1.149922354576	-0.0823456931140543	11.0473494772671	2.49935105976173e-15	8.77863466313085e-14	24.6186103015779
PC	-3.1353342707893	0.141817106381199	-11.044170251646	2.52616930311747e-15	8.85695745470471e-14	24.6079877684768
ARPC1A	1.17533676373008	0.0401075716109273	11.0408360891968	2.5546071773639e-15	8.94066894092054e-14	24.5968461802001
CD33	2.90763490779253	-0.108491985102237	11.0395635597278	2.56554604250628e-15	8.96294775170777e-14	24.5925934669362
APOH	-2.31450125888401	-0.0783632537141011	-11.0382272518921	2.5770841432415e-15	8.98723703263169e-14	24.5881273896997
IQGAP1	1.09278192430741	-0.118986340659566	11.03433002549	2.61103454751337e-15	9.08946111842175e-14	24.57510117013
NCK1	1.33452782127164	-0.0888812626481219	11.0248221764239	2.69577146355192e-15	9.36191529795268e-14	24.5433137534586
GABARAPL1	-1.34739164786736	-0.0879216148390256	-11.0244821261751	2.69885307584227e-15	9.36191529795268e-14	24.5421766578908
BTK	2.56401802902226	-0.355374213422795	11.0147344304072	2.78871975714987e-15	9.65655804247003e-14	24.5095750762466
RP3-507I15.1	1.04495757627532	0.0467448554277433	11.0130077344142	2.80495129130055e-15	9.695633220141e-14	24.5037988158614
CAMLG	1.11744516121083	0.0569745910794293	11.0001705214048	2.92865909814212e-15	1.01054207155788e-13	24.4608430891136
TTC36	-4.10662771812589	0.0442699743525705	-10.9935772333151	2.99432611412805e-15	1.0313848420175e-13	24.4387726179023
OSMR	2.06350642845238	-0.230129514172547	10.9882220032146	3.04875678211852e-15	1.04829095039896e-13	24.420842401835
SPNS2	-1.40119650260458	-0.19239223615055	-10.9866612909606	3.06480736392416e-15	1.05196426489579e-13	24.4156161921845
GAS7	1.429854919059	-0.27785146843459	10.9703286392872	3.23798793326007e-15	1.10946373258678e-13	24.3609061540918
GDPD3	-2.28848431252641	0.277636850983552	-10.9687205748501	3.25556505556204e-15	1.11010601367401e-13	24.3555177473824
HDHD3	-1.52896361098437	0.150440169884202	-10.9686029335875	3.25685472658071e-15	1.11010601367401e-13	24.3551235346101
RRM1	1.33485950084915	-0.00116093486913522	10.9674514718445	3.26950520886815e-15	1.11248320466331e-13	24.351264924563
SOST	-5.13381047243354	-0.219675925818306	-10.9649790412674	3.29683657391327e-15	1.11983882170063e-13	24.3429791126198
RPL22L1	2.14939854689094	0.0441056019115459	10.9626034520848	3.32331500110613e-15	1.12687977001175e-13	24.3350171179912
VKORC1	1.32599618638963	0.142238473075453	10.9612622469082	3.33835898885413e-15	1.13002586912871e-13	24.3305216377183
KIAA0101	2.10679671411254	0.0713679294123345	10.9481472189887	3.48914528285973e-15	1.17903031722014e-13	24.2865504687716
EBI3	2.99128270177308	-0.468235084464968	10.9385554271463	3.60376787091509e-15	1.21566689332297e-13	24.2543780594785
MELK	3.87949996587239	-0.72060164489911	10.9341068030779	3.6582142532771e-15	1.23191307817832e-13	24.2394527323927
SGK2	-1.69292045547801	-0.0353315494354737	-10.9284124137672	3.72912292582349e-15	1.25363773967778e-13	24.2203441781923
CMTM3	1.21311076637972	-0.113136193736152	10.919428192747	3.84383469619857e-15	1.28998829128075e-13	24.1901877123494
RRAS	1.26130060573107	0.0775511361988706	10.9141080117208	3.91343860880659e-15	1.31110227852992e-13	24.1723251959679
SIPA1	1.69178354790693	-0.142495466529587	10.9110898771782	3.95348990675316e-15	1.3193114166995e-13	24.1621902245732
NFKBIE	1.20618375567151	-0.0918160359492784	10.9107417507157	3.95813619582279e-15	1.3193114166995e-13	24.1610211336423
SLC25A44	-1.12538546094797	0.120388943895981	-10.9079427910719	3.99569384302264e-15	1.32858442335382e-13	24.1516210129467
CCL18	4.3149224635709	0.019143610448456	10.9076595648342	3.99951431082583e-15	1.32858442335382e-13	24.1506697615991
LLGL2	-1.36760855624703	-0.135601258623393	-10.9029991165216	4.06291257843217e-15	1.34736080583235e-13	24.1350156076868
CENPM	3.21485523768268	0.800595651974382	10.8968955787878	4.14748118487365e-15	1.37076701083202e-13	24.1145100862797
CYP4F3	-4.31871113488541	-0.16880837380835	-10.888956126669	4.2601567253543e-15	1.40563655993635e-13	24.0878296144226
MYADM	1.66886067112908	-0.108240577544784	10.880467720768	4.38404886950318e-15	1.44408359316627e-13	24.0592956501227
MPG	1.11191043726316	-0.0323880594112598	10.8750969067546	4.46431345332339e-15	1.46805502301485e-13	24.0412368785918
CUL4B	1.20525663498638	-0.058460398259439	10.8745745776126	4.47219827779895e-15	1.46818448989249e-13	24.0394804115935
MET	1.92211529265873	-0.0277205852147319	10.8673648633966	4.58248194119851e-15	1.50187397266805e-13	24.0152323919597
CEL	-4.30220888418739	0.00416639569565052	-10.8596699895861	4.70322220294681e-15	1.53887231979223e-13	23.9893454882477
SMC4	1.38958192072884	-0.0206742065253123	10.8584020898071	4.72342321141519e-15	1.54290619200877e-13	23.9850793406426
ITGA5	2.37673690787906	0.00919987930041275	10.8563110532393	4.75693076566123e-15	1.55126599128443e-13	23.9780431162497
TMEM132E	-2.60745356504268	0.326927085895234	-10.8505121922494	4.85111648562217e-15	1.57935269105829e-13	23.9585274046987
SP110	1.11069230838113	-0.0606147127047016	10.8479189522397	4.89384402867639e-15	1.59062104673348e-13	23.9497986544443
IL4I1	3.31968661650449	-0.600063803522199	10.8469381337906	4.91010346684855e-15	1.59326354050935e-13	23.9464970367258
TUBA1C	1.0512592273171	-0.0343419473005216	10.8454739221289	4.93447798293115e-15	1.59610306382238e-13	23.9415680037412
MAGI1	-1.25815641539673	-0.083888628885086	-10.8454341433624	4.93514187803646e-15	1.59610306382238e-13	23.9414340911871
CRTAM	4.42424307382655	-0.680576836528189	10.8445115237743	4.9505654672191e-15	1.59845358471214e-13	23.9383280986633
SUGCT	-2.68448984550151	0.32763738321097	-10.8406738095481	5.01524582510972e-15	1.61250364039401e-13	23.9254073192101
HLA-DMA	1.93272682603321	0.0890872373279765	10.8404666017365	5.01876228705722e-15	1.61250364039401e-13	23.9247096416061
P2RY12	3.30063637593833	-0.424696962454664	10.8361819101418	5.09203774544188e-15	1.63336903065328e-13	23.9102816994826
RND3	1.94031658285091	-0.0327631475362245	10.8347504410906	5.11675852249107e-15	1.63861683467814e-13	23.9054609695908
FYB	2.06408384317339	-0.230661111309897	10.8330531626064	5.146226948639e-15	1.64536544806486e-13	23.8997447471705
SLC25A10	-1.95779194150401	0.302386276706733	-10.8306246748698	5.18868934600936e-15	1.65623978000713e-13	23.8915652779638
CXCL11	3.72771452967972	0.0418956640368179	10.8262924141583	5.26532087127817e-15	1.67796786595416e-13	23.8769718214748
NOS1	-1.55316806405267	-0.140637485904187	-10.825407863244	5.28110741514721e-15	1.68026662710179e-13	23.8739918756773
TAGLN2	1.76157523580586	-0.0652778791561003	10.824333105451	5.30035296954228e-15	1.68365669124893e-13	23.8703710144363
CETN3	1.34723790598291	-0.135808205245609	10.821535862919	5.350775881952e-15	1.69692324450449e-13	23.8609464232148
CISH	-1.52028157119857	-0.0921081852375722	-10.8204519475959	5.37044456532317e-15	1.70040941899465e-13	23.857294186293
PCYT2	-1.83931718750534	-0.0786829469155311	-10.8170352165507	5.43292399102422e-15	1.7174173758078e-13	23.8457806022257
RASSF5	2.5879523683021	-0.487955547410656	10.8107401774325	5.54996756070915e-15	1.7515912113098e-13	23.8245639839481
SPHK2	-1.88507836306589	-0.00188064837806424	-10.8029585604291	5.69818050473371e-15	1.7954765227054e-13	23.798330223853
SLC1A4	1.51322392843945	-0.134028412322905	10.7983705074185	5.78743545349128e-15	1.82067331385194e-13	23.7828592266271
H2AFZ	1.09778356277229	0.0614832750117855	10.7837384014971	6.0816370465363e-15	1.91016032812604e-13	23.7335020071536
STAMBPL1	2.01200111332793	0.0351033892253682	10.7789126864741	6.18194456014158e-15	1.93855890294744e-13	23.7172180017421
SLAMF7	2.92483081836433	-0.221796496812482	10.7625069452671	6.53563227998608e-15	2.04293232943297e-13	23.6618364517157
TMEM207	-3.25547275834742	0.353784880071851	-10.7618365012129	6.55051356941478e-15	2.04432349437835e-13	23.6595724948965
FMO4	-1.74999423286957	-0.296580900997117	-10.7612308859624	6.56398534568899e-15	2.04527104594847e-13	23.6575274041635
ACAD8	-1.2735770952329	-0.00577839136306453	-10.7596960689536	6.59825255523069e-15	2.052684949682e-13	23.6523443057081
KCTD6	-1.19798582867987	0.0358420123839835	-10.756353829409	6.67350021893845e-15	2.07280397450039e-13	23.6410565050361
GPHN	-1.26200515819671	-0.0887271440630991	-10.7552322824028	6.69894476838115e-15	2.07741484992883e-13	23.6372683753687
ALOX5	2.25673483807058	-0.352081057384122	10.7437767665752	6.96451953667209e-15	2.1563604802407e-13	23.5985673701574
TMEM30B	-1.62833536263375	-0.220471308336223	-10.7393526945465	7.06990962926453e-15	2.18553878271223e-13	23.583616851706
PGK1	1.23510742926945	-0.0564161824953892	10.7381728822549	7.09828633491639e-15	2.19085533666183e-13	23.5796294353934
PLA2R1	-2.14623308009298	0.0331935464215272	-10.7295591996813	7.30898004204064e-15	2.25233804786092e-13	23.5505125155128
GPR65	3.22933561059667	-0.548313284768116	10.7259887358022	7.39815754227758e-15	2.27624002623388e-13	23.5384405474973
NNMT	3.8534578680761	-0.818805369829823	10.7247670812393	7.42892197208547e-15	2.28212291114268e-13	23.5343096926866
WIPF1	1.20116957900806	-0.0741005173205534	10.7219229017842	7.50104765213293e-15	2.30067344184904e-13	23.5246917806438
CDC14B	-1.13908574231324	-0.0857556991619492	-10.7110400283321	7.78362367437668e-15	2.38361313115795e-13	23.4878808869578
DNASE2	1.2875142259687	-0.0173885684999891	10.7063452323783	7.90882400448853e-15	2.41817537697302e-13	23.4719964043483
PGM2	1.20783339561162	-0.128130813632045	10.6980553854289	8.13488813340452e-15	2.47955944831408e-13	23.443941695378
PTAFR	1.50712240003052	-0.244892401556777	10.6974914585363	8.15050159493518e-15	2.48046088135302e-13	23.4420329315948
EXOSC5	1.31248232992691	0.165947500124126	10.6968344644819	8.16873000930443e-15	2.48215410003655e-13	23.4398091072197
AMT	-1.7257538960652	-0.123807877739915	-10.6943373926161	8.23838838821012e-15	2.49944541827446e-13	23.431356414977
PPAPDC1A	-2.54237757344151	-0.474988706651255	-10.6873168939594	8.43746604636323e-15	2.55588712585275e-13	23.4075876132051
HIGD1A	-1.10045951625031	-0.122159223732998	-10.6858322421904	8.48018468078191e-15	2.5648632647939e-13	23.4025603549358
KLK1	-2.97518571832281	0.690319699718017	-10.6826348638178	8.5729282183675e-15	2.5865894875384e-13	23.3917326192904
FMN2	-2.30464645548629	-0.212132512635602	-10.6797227758724	8.65828830947774e-15	2.60666348045245e-13	23.3818699066236
COLEC11	-2.10327838421327	0.234750860651768	-10.679068442258	8.67758623718198e-15	2.60846645187929e-13	23.3796536537937
PALM	-1.79686988131855	-0.0880007153158725	-10.6785345730003	8.69336356724226e-15	2.6092072366674e-13	23.3778453792392
DANCR	-1.79470784309841	-0.185811631555544	-10.6678026667959	9.01674339399969e-15	2.69800234777099e-13	23.3414877732786
TNFAIP3	1.7540122220768	-0.0448601151872967	10.6650961285604	9.10020064714229e-15	2.7188236659046e-13	23.3323163103158
ANLN	3.67626043301517	-0.331156599144712	10.6632732948181	9.15684800071265e-15	2.73158392642264e-13	23.3261388889311
SLC25A25	-1.81114141712587	-0.0558940363195832	-10.6561830118635	9.38059916319252e-15	2.78983858876192e-13	23.3021066634414
PRR15	-2.50964783999962	-0.419915326751035	-10.6545812128531	9.43190825023497e-15	2.8008480272175e-13	23.2966765747311
ELMO1	1.55770088408253	-0.000827467465093654	10.6507269930592	9.55653254664086e-15	2.83356250199114e-13	23.2836095009116
RNF150	-1.68868441826336	-0.221583385387316	-10.6475934514848	9.65907959560947e-15	2.8596420089781e-13	23.2729844178703
SLC23A1	-2.76476159600415	-0.292294999537722	-10.6420649757134	9.84272173720251e-15	2.9096154348029e-13	23.2542357493385
MAN2B1	1.28141961178912	0.220050985613612	10.6327875323427	1.01588597577978e-14	2.99854657218493e-13	23.2227648082418
RASSF3	1.71163092666209	-0.186974885057209	10.6310926783868	1.0217712645195e-14	3.01138270876957e-13	23.2170143838795
KCTD9	1.28124048480899	0.114525753709432	10.6288349972823	1.02966449282931e-14	3.03008924849274e-13	23.2093538110521
C3	3.74119883846337	-0.268057367069106	10.627685429581	1.0337072181503e-14	3.03742545255289e-13	23.2054529547982
PIK3CG	2.54839379586513	-0.418981832885433	10.6270882921754	1.03581351823581e-14	3.03905825507541e-13	23.2034266098427
DDX39A	1.09559477352344	0.104200126823476	10.6264925807182	1.0379191099725e-14	3.04068410109879e-13	23.2014050601724
COL4A6	-2.19645509649138	-0.0328103673203132	-10.6139586447561	1.08323826709348e-14	3.16871444727836e-13	23.1588610018026
TBXAS1	1.86944465811976	-0.196748084634434	10.6124299734571	1.08890062614082e-14	3.18053105390967e-13	23.1536709011875
RAB42	2.891140087554	0.34143229592256	10.611288061783	1.09314989453307e-14	3.18819118793952e-13	23.1497937289259
PLCG2	-1.32531234736417	0.0511342811115167	-10.6088647224361	1.10222319182893e-14	3.20987701881949e-13	23.141565151904
HK1	1.45996078113126	-0.0468985242988849	10.6048324124253	1.11748967333019e-14	3.24950743436178e-13	23.1278716363794
NCF4	2.58464886088804	-0.491438136138701	10.6003352475264	1.1347683156232e-14	3.28573542808565e-13	23.1125971505438
VWA8	-1.20519060216832	0.0581686354459048	-10.6002811638238	1.13497774621868e-14	3.28573542808565e-13	23.1124134418101
EFNA3	2.43957352619869	-0.490653635898023	10.5943297747948	1.15826381425764e-14	3.34820243298458e-13	23.0921958845152
POLR3C	1.02881004377433	-0.0598858333540124	10.5922324935605	1.16658441479126e-14	3.3672883572156e-13	23.08507014538
SPARC	1.64209527259866	-0.0208065178344626	10.5913886300518	1.16994931330272e-14	3.3720347928559e-13	23.0822028764167
ACOX2	-2.7701564329594	0.145699571570924	-10.5858529195029	1.19226743056987e-14	3.4281224118351e-13	23.063391549777
TCIRG1	2.09925061241827	0.0549831390982251	10.5856956981085	1.19290753858439e-14	3.4281224118351e-13	23.0628572289014
KISS1R	4.95992866312106	0.916410852294073	10.5686009498292	1.26461963653399e-14	3.62888437136597e-13	23.0047422910508
TBC1D24	-1.42806471387053	-0.0117998257511719	-10.5509843259632	1.34308398111787e-14	3.84278875123052e-13	22.9448159066435
MPP7	-1.60970090992474	-0.14107309662493	-10.5405855696207	1.3916906164068e-14	3.97605603366718e-13	22.9094247681587
IGSF6	3.16934565567178	-0.372819938964614	10.5357635605182	1.41482946737378e-14	4.0304131876539e-13	22.8930090729183
MAGI3	-1.26724031084598	-0.0936924698300036	-10.5250931270171	1.46742399218363e-14	4.1741716723958e-13	22.8566733826866
MYO9B	1.14753842247229	-0.315987199842092	10.5199551772523	1.49344921044165e-14	4.24204508339797e-13	22.8391723518026
FKBP10	3.94973672821569	0.251567837433667	10.5172300699856	1.50744143804174e-14	4.26941398037284e-13	22.8298887132503
CCNA2	2.44967474339332	-0.108340254219092	10.5164871272877	1.51127904792978e-14	4.27410650221873e-13	22.8273575697639
BCL2A1	2.59118063367989	-0.0306120293381832	10.5142219769998	1.52304053058399e-14	4.30116302001666e-13	22.8196399792772
LIN52	-1.37471689108701	0.28465397582519	-10.5132178604663	1.52828381042907e-14	4.30475975335059e-13	22.8162186560732
LAD1	-2.10875923755198	-0.485377485836813	-10.5131369751639	1.5287069688923e-14	4.30475975335059e-13	22.8159430505061
SSPN	1.83482552535338	0.181296704704217	10.5098141076627	1.5461935454472e-14	4.3433464093422e-13	22.8046201496759
LIX1L	1.3285485663215	-0.0113237639417207	10.5096916018201	1.54684208057598e-14	4.3433464093422e-13	22.8042026769521
HACL1	-1.19189594630129	0.091701537711087	-10.5073632110696	1.5592207615719e-14	4.37184087354043e-13	22.7962676920728
GLIPR2	1.4419753921279	-0.137965749757054	10.5045955964451	1.57406479590531e-14	4.40715656213546e-13	22.786835009608
FAS	1.94845433169826	-0.207408228452083	10.5033228754539	1.58093884982556e-14	4.42008851893455e-13	22.7824969651138
DDOST	1.01028022299015	-0.0599902351321221	10.4899199979638	1.65519652645137e-14	4.61462396569165e-13	22.736801608329
CNOT8	1.17686021993231	-0.093811078636908	10.4899145108529	1.6552276380842e-14	4.61462396569165e-13	22.736782896289
DACH1	-2.48469600860144	-0.356697643569038	-10.4883367362075	1.6641980915189e-14	4.63304238574984e-13	22.7314022484279
CKS1B	1.37737838530244	0.121467691842489	10.4867448881015	1.67329833702001e-14	4.65176937691562e-13	22.7259733009517
TNFRSF10A	1.17576951315799	-0.0279175529677628	10.4831704843129	1.69391603512049e-14	4.70241648333237e-13	22.7137817933769
CYP4A11	-3.68043109510948	-0.0841856947259471	-10.4799353401124	1.71279804062345e-14	4.74810874090226e-13	22.7027460939089
GPC5	-4.5507561793148	0.240650919042229	-10.4781297189964	1.72342891062135e-14	4.76410200553848e-13	22.6965862226531
EDDM3A	-1.789241168516	-0.183197939601644	-10.4773706269273	1.72791806083392e-14	4.76978395412451e-13	22.693996464587
KLRG2	-2.69715299654672	-0.152629994416641	-10.4757828218203	1.73734632445473e-14	4.78906478382395e-13	22.6885792007693
TRPC1	1.35932005012061	0.00439609058419801	10.4715355284554	1.7628226827759e-14	4.85246653928719e-13	22.6740868139409
MAD2L1	1.93917130666465	-0.136154136371518	10.4665255762619	1.79335932187519e-14	4.92960018926112e-13	22.6569893229349
LINGO2	-1.83109486655798	-0.135489868207842	-10.464961395971	1.80300235363007e-14	4.94916570431313e-13	22.6516506156597
MAP3K9	-1.44545398439691	-0.18636772628952	-10.4626221444165	1.81752147123575e-14	4.98204242164328e-13	22.6436659599018
GNA13	1.02156071214309	-0.0627235645751151	10.4571911290354	1.85168748673469e-14	5.06860657158006e-13	22.6251255241033
C12orf57	1.1297248952223	-0.0754797413177101	10.4475163360762	1.91416643302909e-14	5.23232188576528e-13	22.592088842039
BMPR1B	-2.58486833148648	-0.269047768518669	-10.445067301683	1.93031711841747e-14	5.26912050193093e-13	22.5837242932416
IDO1	3.68180041501829	-0.643717120758207	10.4321630395434	2.01771896689006e-14	5.4958167152591e-13	22.5396385352215
FLJ22763	-3.98607675500781	-0.787513953346333	-10.4319818177989	2.01897445532249e-14	5.4958167152591e-13	22.5390192716881
ADM	2.84476324006994	-0.243082314515438	10.4292026973144	2.03832710750801e-14	5.53880731555837e-13	22.5295220801599
ACOT13	-1.21845601258148	0.247578437245693	-10.4289037680201	2.04041985909135e-14	5.53880731555837e-13	22.5285004826754
DCLK1	2.35142857900112	0.0318392978655959	10.4273358693203	2.05143204404757e-14	5.55331721426633e-13	22.5231419782003
OGFRL1	1.49632228843806	-0.0116328277625153	10.4256924562778	2.06303906024895e-14	5.57703483335437e-13	22.517525076123
MAPK10	-1.44466936865885	-0.230325121857976	-10.4212345408428	2.09485937600726e-14	5.64747577859234e-13	22.5022870564603
SAP30	1.8262464011576	-0.129615910731896	10.4203377715135	2.10132011671163e-14	5.65711167135045e-13	22.4992214364942
OVOL2	-1.80763451902798	0.035826825471537	-10.418528784655	2.11441421527122e-14	5.67473728050823e-13	22.4930370927027
ALYREF	1.12517454233185	0.00494419413159982	10.418356232831	2.11566750554515e-14	5.67473728050823e-13	22.4924471730258
TMEM87B	1.11740278571722	0.0420411771728539	10.4060854005112	2.20674552962895e-14	5.90041004572958e-13	22.4504865230098
TUBB	1.112771065923	-0.0178453417984978	10.4048109777369	2.21642891033715e-14	5.91822754955012e-13	22.4461275428571
PDIA6	1.39740682831458	-0.266686408458662	10.4004904507439	2.24957791939532e-14	5.99041815791154e-13	22.4313483513994
MAL	-3.4463918749453	-0.880657963013883	-10.3964899219904	2.2807181960601e-14	6.06510121093378e-13	22.4176617804752
CXCL9	3.57401278325174	-0.040884077769853	10.3936328922584	2.30322363571469e-14	6.11665041143254e-13	22.4078861639422
CPNE4	-2.22613515062128	-0.137228351417546	-10.3868179490078	2.35781643801453e-14	6.24470869846577e-13	22.3845641992586
MYO1F	2.00994839281989	-0.19040345766018	10.3838260712421	2.38219474613089e-14	6.29226884493523e-13	22.3743236982453
IFNAR2	1.5719698253616	-0.24078676481638	10.3803912706897	2.4104961873323e-14	6.35845420935744e-13	22.3625658553492
CD40	1.3396044571331	0.0204715497865054	10.3771896117094	2.43718241525404e-14	6.42020674147364e-13	22.351604820991
PRODH2	-2.79694042001268	0.128996903529163	-10.3658864439792	2.53380532780728e-14	6.66577860667045e-13	22.3128980836687
MYOF	2.04798806325403	-0.347407900167151	10.3604856221137	2.58133033637271e-14	6.7817015097277e-13	22.2943980419336
SYPL2	-1.4816345266499	-0.153232332350475	-10.3594242834414	2.5907750144988e-14	6.79740287940588e-13	22.2907621101681
FABP5	3.96235078309572	-0.557443209419094	10.3566632136081	2.61550916641193e-14	6.85312354980047e-13	22.2813026135439
TRPV2	2.27978373574896	-0.321606377536829	10.3561117576892	2.62047771052991e-14	6.85697498647205e-13	22.2794132023788
PLEKHA2	1.55985009598841	-0.0588317158349129	10.3501214360329	2.67506789375775e-14	6.99048741996776e-13	22.2588866862335
AQP6	-2.40875856767698	0.027823400002775	-10.3491119703283	2.68437967606799e-14	7.00548032906211e-13	22.2554272164838
ATF4	1.11022158520412	0.0952335267958742	10.344555797838	2.72681700210121e-14	7.10676681172629e-13	22.2398115639318
HNRNPF	1.10801085071928	-0.115358371876264	10.3382630314435	2.78654611375513e-14	7.25279113990528e-13	22.2182399106236
SLC7A13	-5.72493091393115	1.26627423707969	-10.3374722662472	2.79414470708272e-14	7.26292335730959e-13	22.2155288278789
RFC4	1.08877054415269	0.14122155370204	10.3358365545108	2.80992901746709e-14	7.29427798852152e-13	22.2099206693447
SNRNP27	1.08060356933798	-0.0583713097406066	10.3326772383091	2.8406712556643e-14	7.36432750525988e-13	22.1990878192842
HPGD	-2.81067773723154	-0.540736453393951	-10.3291004883095	2.87588564610649e-14	7.44577051229075e-13	22.1868222149732
CD1D	2.54116801020827	-0.0520778959888936	10.3242037801471	2.92481169310371e-14	7.56245176426643e-13	22.1700276654632
PRELID2	1.8943693070231	0.106716212753593	10.3231349168075	2.93560266754158e-14	7.58035265891271e-13	22.1663613384809
TNFAIP8L2	2.31010349829257	-0.351541161740903	10.3226818473473	2.94018886887982e-14	7.58220547910206e-13	22.1648072159838
ATP6V0E2	-1.61456774682182	0.277697075125062	-10.3205566271764	2.96179821215528e-14	7.62789529041147e-13	22.1575169432982
RP11-320H14.1	-4.07414736590866	-0.664371491684064	-10.3186198779751	2.98163085381318e-14	7.66587127895455e-13	22.1508727269901
IRX3	3.00178955431988	-0.115880329824422	10.3183537569385	2.98436644004404e-14	7.66587127895455e-13	22.1499597367417
BIK	-2.62145200329851	-0.402718558414075	-10.3125248182424	3.04492491065832e-14	7.80097821228658e-13	22.1299600953725
HIBCH	-1.48260830256682	0.0420905736911326	-10.310003442598	3.07150331145483e-14	7.85879809415185e-13	22.1213077673815
GPX8	1.95044914311116	0.0300338596339558	10.3043995614251	3.13141733111694e-14	7.99123024382303e-13	22.1020748437723
TNFRSF1B	1.77069346086226	-0.147516102642786	10.3036938566114	3.13904560700515e-14	8.00028021478465e-13	22.0996525501251
DDX25	-2.26864206968512	-0.464235938072344	-10.2989135000434	3.19121513546503e-14	8.12267862856872e-13	22.0832426807177
BTN3A1	1.28582485690745	0.0502948458771771	10.2877300468952	3.31671075082441e-14	8.42023497479374e-13	22.0448418769282
CGN	-1.98582247558983	-0.524697560634221	-10.2865009623868	3.33080353201821e-14	8.44507353480271e-13	22.0406206469665
VTCN1	-3.68481960537592	-0.186759522503405	-10.2794422732583	3.4129181066155e-14	8.63093960923318e-13	22.0163744697725
FBXO21	-1.25466402412696	-0.161491136916277	-10.278876068152	3.41959276007171e-14	8.63667506503162e-13	22.0144293337839
RAP1B	1.08034373776064	-0.0785939967684559	10.2726526894224	3.49383104796618e-14	8.81281785187761e-13	21.9930470981563
SCNN1G	-2.83197931001875	-0.786998872598165	-10.2704690237655	3.52026386410849e-14	8.86807859545787e-13	21.9855433929978
IDNK	-1.56733883014955	0.0663642958216997	-10.2697016402984	3.52960076165597e-14	8.88018553628952e-13	21.9829063083703
KDM2B	1.05137223496722	0.0692006343809769	10.2665029196914	3.5687903686166e-14	8.96727210698933e-13	21.9719132759045
SELENBP1	-1.98203528714074	-0.0523449010724852	-10.2643438501658	3.59549066583016e-14	9.02279405372668e-13	21.9644925264742
RAP2B	1.87318659102916	-0.376617395701254	10.262454025204	3.61902686059497e-14	9.07024391826097e-13	21.9579967228043
CTXN3	-4.89574018567436	-0.767033539318587	-10.2615467443573	3.6303815072428e-14	9.08708137425946e-13	21.9548780207357
OSBPL6	-2.44806784554018	0.122165796751839	-10.2608034989744	3.63971004940075e-14	9.09881087477109e-13	21.9523231045443
GBP2	2.03416048214031	0.0384092216915645	10.2484096360981	3.79888346490691e-14	9.48462637308415e-13	21.9097094383437
BAX	1.15034061260588	-0.131836008980336	10.246442149588	3.82479064440467e-14	9.53715926713576e-13	21.9029429900236
AHNAK2	2.73152653852003	-0.103749647742851	10.244070849045	3.85625234600088e-14	9.60339132519329e-13	21.8947871660737
NDUFA4L2	7.20007672363693	0.375387085798817	10.2419881222133	3.88410085961901e-14	9.66046862280115e-13	21.8876233135844
LHX1	-2.38058832751393	-0.211851809396584	-10.2391920654344	3.92180707388484e-14	9.71725623780898e-13	21.8780050531912
CD163	2.57816171063219	-0.0281674101283948	10.2347372321793	3.98264793141091e-14	9.85554505148011e-13	21.8626788068037
PPP1R3B	1.53105619863053	-0.0986916360216152	10.2309418759153	4.03523360651412e-14	9.97308240278313e-13	21.8496195613923
PLEKHG2	1.65764108178947	-0.282043148759627	10.2226700403304	4.15228462629471e-14	1.02494491676007e-12	21.8211515689645
INTS2	1.02974358882868	-0.0779880883618046	10.2145123879624	4.27107842129152e-14	1.0502994476649e-12	21.7930686825205
DNMBP	-1.14267880775762	0.00868150450500766	-10.2112951418922	4.31886719614844e-14	1.05939271811406e-12	21.7819911016808
ZNF395	2.94644065063409	0.0668381112730752	10.2071879800754	4.38066027113856e-14	1.07320700817556e-12	21.7678476122479
ADHFE1	-1.42574707060034	-0.0205639642222094	-10.20449774548	4.421618561266e-14	1.08055849056545e-12	21.7585824058952
ANGPTL4	5.11652684766971	-0.0901501837834872	10.2044927795959	4.42169452234038e-14	1.08055849056545e-12	21.7585653025359
RP4-680D5.8	-2.4632610019401	0.161708536845766	-10.1976043037198	4.52834374695469e-14	1.10524295263468e-12	21.734837428527
CD247	2.32475643857211	-0.036216849651417	10.1904222457963	4.64230581100654e-14	1.13164865161588e-12	21.7100923804728
TUBA1A	1.86338287334727	-0.191184778964358	10.1868203799924	4.70054484718575e-14	1.14300221414384e-12	21.6976802499196
NOD2	3.35127176247497	-0.457724849160588	10.1842111180962	4.74319466486514e-14	1.15194389388714e-12	21.6886877139881
FAM89B	1.2254419583092	-0.0378661073890771	10.1782464132893	4.84216459741781e-14	1.17452455377217e-12	21.668128026352
WDR72	-2.25826199184496	-0.19268598231963	-10.1694333514891	4.99222643200244e-14	1.20942701904593e-12	21.6377427680362
TMEM174	-2.29105701951278	-0.257906457693359	-10.1685972562225	5.00670445856589e-14	1.21143704547448e-12	21.6348596481432
NOB1	1.17417757929437	-0.0499900052371507	10.1679554877225	5.01784623124694e-14	1.21263586049579e-12	21.6326465729224
DDN	-4.27614211749788	-0.0114489396661031	-10.1652032380443	5.06591278637227e-14	1.22274414655308e-12	21.6231551680477
C1S	3.19146961007434	-0.115959932684631	10.1635452053296	5.09509356612728e-14	1.2282747700188e-12	21.6174368527234
NFE2L3	2.27505281631029	0.165551348367178	10.161043405743	5.13944593279661e-14	1.23744472772581e-12	21.6088079016252
GMPR	-1.85884688539343	-0.0819274490891156	-10.1479783120856	5.37748028697284e-14	1.29158377627918e-12	21.563733289471
SLC43A2	-1.28059279980836	0.0380763434155321	-10.1450773219789	5.43182652223532e-14	1.30212856746831e-12	21.5537221734916
DHRS11	-1.56304592512856	-0.253385607675578	-10.1415027103966	5.49955551860061e-14	1.31541820101173e-12	21.5413850925572
DEFB1	-3.00996609960316	-0.427220912266101	-10.1412927015359	5.50356102265226e-14	1.31541820101173e-12	21.5406602414376
GM2A	1.62265826905733	-0.105848716773344	10.1250940936116	5.82156304234053e-14	1.38972976938894e-12	21.4847349066315
GZMA	2.85098780172818	0.0418044580046023	10.1205076266463	5.91492759073991e-14	1.408586462344e-12	21.468894708644
CYFIP2	-1.69494576158483	0.0228268896828332	-10.1122967382374	6.08586548333589e-14	1.44753492242597e-12	21.4405308329441
RACGAP1	1.53629371850987	0.166161965799035	10.1034657725613	6.2752848582136e-14	1.48897467235022e-12	21.4100162508541
DPP6	-1.90003005691065	-0.0344326878458799	-10.1006010081474	6.33800250186999e-14	1.50203761830895e-12	21.4001153887804
SEMA5B	3.00501998359546	0.0434125487706738	10.0977380822116	6.40131219528442e-14	1.51520915115192e-12	21.3902199344822
TFAP2A	-1.81514543965414	-0.380581254456271	-10.0882078982726	6.61669623864275e-14	1.56430192498383e-12	21.3572728733417
SLC30A2	-2.81680459821962	0.236986847921043	-10.0754029325229	6.91765931178208e-14	1.63151871060911e-12	21.3129880034911
SLIT2	-2.58271213463886	-0.0201163986921199	-10.0730488405394	6.97447499642461e-14	1.64294153191017e-12	21.3048445266987
INPP5J	-2.73439849404468	-0.127300597754943	-10.0723189762141	6.99218566673957e-14	1.64513621707598e-12	21.3023195880857
TOP2A	3.18609247615324	-0.453454808301803	10.0713497249429	7.01577543449143e-14	1.64870722710549e-12	21.2989664045577
YIPF5	1.01310575050484	-0.0750260674955387	10.064412492129	7.1869769176871e-14	1.68691689352993e-12	21.2749634765159
FLNA	1.62463828883723	0.0568940665504368	10.062192501078	7.24264931346809e-14	1.6979507642902e-12	21.2672811075336
IRF8	1.83527368392332	-0.0704355619155869	10.0612770023122	7.26573457385969e-14	1.70132774089697e-12	21.2641128222348
SFR1	1.62938442970491	-0.105495127239214	10.0592223962787	7.31781441678169e-14	1.71147786103227e-12	21.2570020550278
CACFD1	-1.02518708578753	0.00310497825327615	-10.0423073440109	7.76115342767403e-14	1.81300174051232e-12	21.1984425149411
CNTN3	-3.98804622886728	-1.30953649566779	-10.0404780719508	7.81069477773503e-14	1.82240246367653e-12	21.1921076519695
KIF2A	1.41681621759651	-0.0640052732870762	10.0348766596207	7.96438974750717e-14	1.85605320643749e-12	21.1727072935194
POT1	1.01604595530415	-0.0185167506751549	10.0342829784165	7.98085744921202e-14	1.857682008873e-12	21.170650882538
RGS19	1.13393269568316	0.0220034392983639	10.0324973572226	8.03059499047902e-14	1.86704188871172e-12	21.1644655508631
SLC16A9	-3.42685151537565	-0.29427457077778	-10.0315389343656	8.05742028794949e-14	1.8710590073877e-12	21.1611454561132
CRHBP	-3.38675048194327	-0.400548032661783	-10.0307880493475	8.07849999145543e-14	1.87373398026669e-12	21.1585442246685
TMEM61	-2.91957369203179	-0.265304993792265	-10.0243509827826	8.26150845447756e-14	1.9139161252873e-12	21.136242163339
PFKFB4	2.39998021954007	0.00308852702052221	10.0158499934962	8.50962525750273e-14	1.96674699789854e-12	21.1067821259577
PRF1	2.05140388340292	0.0277869517661825	10.0145830006654	8.54724350723672e-14	1.97154034095273e-12	21.1023906778025
TST	-1.80926920835492	-0.215630333461534	-10.0114523295539	8.64091766852686e-14	1.98538505727383e-12	21.0915388613667
VDR	-1.56974425507411	0.0523771026428987	-10.0082410106338	8.73808185873019e-14	2.00535909074067e-12	21.0804063363724
KIF4A	2.37547468614308	0.00386242781462456	10.0072055928792	8.76964482191468e-14	2.01024875865153e-12	21.0768166530823
S100A4	1.67545998334198	-0.0870691680234829	9.99530453152059	9.14079958775418e-14	2.09043793606061e-12	21.0355481814213
GLUL	1.30652757797091	-0.0536760030040739	9.99243032138476	9.23278932071689e-14	2.10901442770082e-12	21.0255790719626
NLRC5	1.73908283521151	0.0461153000774497	9.98960981768468	9.32396863208637e-14	2.12552890984989e-12	21.0157953295966
GDPD5	1.90037234273708	0.0418357194423037	9.98952341276822	9.3267761746564e-14	2.12552890984989e-12	21.015495594604
KIF20A	3.94184268303278	-0.770213427872875	9.98519331306674	9.46857191216028e-14	2.1553372927576e-12	21.0004735771255
QDPR	-1.24477573916458	0.114443203489938	-9.98136715406686	9.59567537957032e-14	2.17920789993278e-12	20.9871980648195
FOLR3	-1.95639872905201	-0.205794684372785	-9.97802398215194	9.70814342406675e-14	2.20219795102181e-12	20.9755970000602
FEN1	1.2896711589092	0.0312187245160022	9.97574579635094	9.78554555945275e-14	2.21718968115277e-12	20.967690793785
ASB9	-1.62591601355642	0.232853374156559	-9.97411633985703	9.84128872886169e-14	2.22724500920277e-12	20.962035574305
LOX	3.57508464959094	0.420576492359598	9.97241490206458	9.89983647103661e-14	2.23533289165722e-12	20.9561302144223
MSH2	1.34855445068779	-0.264455637857992	9.96891927761079	1.00212290912687e-13	2.26013888331156e-12	20.9439965531194
ZEB2	1.18036501250352	-0.0787869590025359	9.95974826649658	1.03469019225209e-13	2.33090725033893e-12	20.9121564884202
VLDLR	1.44445143332896	-0.0600293540153757	9.95304424882834	1.05917100522754e-13	2.38331716779041e-12	20.8888753584802
RP1-93H18.6	2.46536266953255	0.102332652942882	9.9490812329299	1.07391671456028e-13	2.41372634044345e-12	20.875110555373
MECOM	-1.76497511566958	-0.191208032589739	-9.94868510019117	1.07540200151494e-13	2.41429597109865e-12	20.8737345641329
ZAK	1.1389803576525	-0.0679108012620392	9.94455043568039	1.09102910638095e-13	2.44657659679179e-12	20.859371498457
FECH	-1.11429661095849	0.0796303921585893	-9.9433436418082	1.09563329204181e-13	2.45409335894029e-12	20.8551789547068
NETO2	3.90482072393285	0.442363821694465	9.93392082295884	1.13226444836061e-13	2.53324782230816e-12	20.8224373335838
CCDC181	-2.39109748114332	-0.172477624353478	-9.93227601050727	1.13878423494827e-13	2.54492955766832e-12	20.8167210525831
P2RY13	2.56769909149878	-0.243933715057645	9.9233095840256	1.17499793576961e-13	2.61690733444871e-12	20.7855543310604
GABRA2	-2.72403862904231	-0.172972274855322	-9.92224258000644	1.17938404697697e-13	2.62369443095364e-12	20.7818448922424
SLC25A20	-1.08799264012163	0.0510057776545036	-9.92071506198097	1.18569196199547e-13	2.63473659446137e-12	20.7765342542324
ITGAL	1.78977089908222	-0.14693835088656	9.91845250284758	1.19509787196636e-13	2.64964560650289e-12	20.7686676578073
LILRA6	2.53817543417186	-0.350130698797063	9.91845074289196	1.19510521768894e-13	2.64964560650289e-12	20.7686615384682
MSANTD3	1.33718055880654	-0.135233218778571	9.91447432323036	1.21181895662901e-13	2.68366550632452e-12	20.7548346998227
ALDOC	2.42833850287543	0.478247546068895	9.91344818387233	1.21617020384489e-13	2.69026183128172e-12	20.7512663118163
ASUN	1.15820763696978	0.087726098216995	9.91091584528406	1.22697594406918e-13	2.71110502004643e-12	20.742459627808
KLHL6	2.02881105024783	-0.111052400740285	9.90621900359796	1.24727504626034e-13	2.75285401257392e-12	20.726123574129
DEF6	2.41918573552116	-0.641862617147142	9.9056719373345	1.24966132395898e-13	2.75501825514871e-12	20.724220665917
GLYAT	-3.23498472756697	-0.270692610729179	-9.90273786990815	1.26253843928391e-13	2.7802798732051e-12	20.7140142718632
DUSP26	-1.74158309193744	-0.146470101112829	-9.89147020990484	1.3132474403743e-13	2.88546374258923e-12	20.6748098405599
CA9	4.86734206469545	0.548336821860031	9.89110618058169	1.31491956410259e-13	2.88590241174095e-12	20.6735430087962
ERVMER34-1	-2.63324572074159	-0.17243929612655	-9.89030794882363	1.31859366857579e-13	2.89072900563947e-12	20.6707650891411
RAB4B	-1.94177425570741	0.00989613644835398	-9.88965670045113	1.32159891084376e-13	2.89408011772367e-12	20.668498632409
PTPRO	-1.89859255181517	-0.101203685183673	-9.88375740644293	1.3491386037758e-13	2.95109012225467e-12	20.6479659135632
RNASE2	1.75549722180197	0.162960393469378	9.87978720005353	1.36799808872876e-13	2.98900719520569e-12	20.6341452716478
PARM1	-2.17089726783366	-0.0746962321252466	-9.8785108236281	1.37411754309843e-13	2.99903449077796e-12	20.6297017182392
C17orf62	1.00064709100472	0.0763089438765849	9.86604212967005	1.43537007847108e-13	3.129234501441e-12	20.5862838889129
PPIH	1.13546223412723	-0.00187541027389771	9.8620320475967	1.45564956060076e-13	3.16991952646826e-12	20.5723165147449
C11orf63	-1.59957232483595	-0.287651854983958	-9.85524688722073	1.49062374374477e-13	3.24247888497821e-12	20.5486792930807
GATA3	-2.71963664714826	-0.534179574454659	-9.84827644279363	1.52743641329205e-13	3.31519670698903e-12	20.5243912803361
CDT1	2.17227471869559	-0.198897013505068	9.84782946210129	1.52982809684683e-13	3.31671469802002e-12	20.5228336243008
TMSB4X	1.04471239620022	-0.0907630753601367	9.83909958654707	1.57730471731468e-13	3.41209659543603e-12	20.492406967645
MCM7	1.06461261749202	0.0894310191691322	9.83740017889013	1.586718279474e-13	3.42867602639591e-12	20.4864829583952
LRRC2	-2.54468457928289	-0.393189699621959	-9.83062000929585	1.62484358048856e-13	3.50333436017549e-12	20.4628446079098
KL	-2.29954659662791	-0.24103613946853	-9.82282708251861	1.66980714496204e-13	3.59632420155066e-12	20.4356691074613
PKN1	1.20672947004651	-0.0824260498889465	9.81992874662692	1.68684847251856e-13	3.62505956281702e-12	20.4255603169777
ELF1	1.02995931058925	-0.151229955672666	9.8193811731827	1.69008769340037e-13	3.62804257425562e-12	20.4236503909902
BNIP3L	1.12598415769594	0.134549286614827	9.81811865754019	1.69758016068675e-13	3.6361610458251e-12	20.4192466338285
HIP1R	-1.28530050737057	-0.0435419312465046	-9.81348240236728	1.72538297189896e-13	3.69167913386984e-12	20.4030734906945
FANCL	1.07102291791254	-0.0687058555759453	9.81124648921489	1.73895513667059e-13	3.71349431015857e-12	20.3952728694635
CLDN19	-2.26907626362153	0.120608260087936	-9.80957436675567	1.74917541380973e-13	3.72631401470184e-12	20.3894388329411
HLA-DPB1	1.92154527189957	-0.00285056919976391	9.80897129115145	1.75287636159106e-13	3.73014373624572e-12	20.3873346261225
MCM2	1.82101244735233	0.206291955777929	9.80529524593811	1.77560697760247e-13	3.77441661106625e-12	20.3745075747388
EHF	-2.64421156731992	-0.0978794290290167	-9.79531929951543	1.83880297814465e-13	3.904517829757e-12	20.3396903965689
TRBC1	2.56592473861475	-0.00126220416402508	9.79349218599132	1.85062103778684e-13	3.92535949346149e-12	20.3333123789378
DNMT3L	-4.60357520670343	0.930370523017109	-9.78708850305941	1.89264944363696e-13	4.01016610225306e-12	20.3109557548968
FTCD	-2.66709487223288	-0.26393344561442	-9.78261753622304	1.92256286495293e-13	4.06914790391063e-12	20.2953439878563
CYP17A1	-2.37207315719803	-0.143919504423194	-9.77017168802264	2.00836971377776e-13	4.24617454372496e-12	20.251873915043
LYZ	3.42884029551121	0.176552229857534	9.75763473814291	2.0987132692745e-13	4.43240100910679e-12	20.2080685198275
ATG12	1.05195017767756	-0.0921758154519092	9.75178058178861	2.14229309370697e-13	4.50986061692406e-12	20.1876076174858
GRHL2	-2.46501556518268	-0.241617040231403	-9.74825957149296	2.16894296095925e-13	4.55639722654437e-12	20.1752995107454
CHSY1	1.76147654013485	0.0545384669095389	9.74824568387527	2.16904873328532e-13	4.55639722654437e-12	20.1752509622656
EIF4EBP1	1.89679034444814	0.424034094235964	9.74568100021203	2.18867164233772e-13	4.59269545162493e-12	20.1662849540524
DIAPH2	1.74817678589039	-0.0788076533002254	9.74269261271681	2.21176246701642e-13	4.63618530385613e-12	20.1558367946798
ELF4	1.86662676133244	-0.27804990573919	9.73801135527325	2.24842896735227e-13	4.70616882658229e-12	20.1394679801086
ASPDH	-2.85858018331028	-0.0714679396564974	-9.73752678527968	2.25225927552804e-13	4.70616882658229e-12	20.137773462423
RAB38	1.59147961927495	0.181048068096434	9.73751495708014	2.25235285439777e-13	4.70616882658229e-12	20.1377320994657
NOX4	-2.22410043985928	-0.0390475614876576	-9.73468658044089	2.2748425708567e-13	4.74809792824499e-12	20.1278408911294
ME2	1.22980843940556	-0.0103287916185762	9.73282960074831	2.28973133961744e-13	4.76952508994892e-12	20.1213463140972
PLK4	1.96454514801705	-0.504185456275829	9.73279924176835	2.28997556489715e-13	4.76952508994892e-12	20.121240133877
CELF6	-1.19373356658566	-0.166297146922255	-9.73153721810371	2.30015130522456e-13	4.78090273675492e-12	20.1168261305189
ABCB1	-2.14611361682408	-0.468606040693979	-9.73151671529149	2.30031699615281e-13	4.78090273675492e-12	20.1167544192774
SPTBN2	-2.39823546556541	-0.199789181797102	-9.73086420185283	2.30559649712974e-13	4.78679933763197e-12	20.1144721451616
CLNK	-2.19847972332955	-0.062202388528939	-9.73014958359391	2.31139251661913e-13	4.79375470192787e-12	20.1119725960876
CCDC109B	2.22428369421844	0.0447356933991489	9.72745354933164	2.33339177247541e-13	4.83426483601962e-12	20.1025420693958
CENPU	1.58592825511294	-0.0693695363864234	9.72226442879928	2.3763306658944e-13	4.9128380507241e-12	20.0843886935394
CDCA2	4.16252188264593	-0.301131729866688	9.7203361111059	2.39248949781385e-13	4.94103284169165e-12	20.0776420133911
RP11-44F14.8	-2.70900238787921	0.142499978720532	-9.71756034051223	2.41594462450276e-13	4.98422091532942e-12	20.0679296094356
GP2	-2.11036183962261	0.146722195062601	-9.71451368589294	2.44195586885056e-13	5.03258602246079e-12	20.057268423465
STK17B	1.5903326081624	-0.0725035009881945	9.71357249921015	2.45004836782866e-13	5.0439598698607e-12	20.0539747172819
TM7SF2	-1.77976143291537	-0.332353686161595	-9.70543669425891	2.52113909311196e-13	5.1740110037593e-12	20.0254992718912
GPR183	2.67700133651317	-0.0342910231823157	9.69956800062148	2.57370858760951e-13	5.2708583708003e-12	20.0049543112594
ADAM15	1.52474728321358	-0.188501562676106	9.68466650250095	2.71221442574513e-13	5.53139339544004e-12	19.9527708671908
XYLB	-1.23227475917861	0.0702152323553747	-9.6823761760926	2.73415939856325e-13	5.57035239630366e-12	19.9447482701958
SHC1	1.47615503641411	0.218553699260039	9.67506745531253	2.8053937221044e-13	5.70954429486231e-12	19.9191433785332
PHYH	-1.31654636568806	0.0255947066289439	-9.67407666956235	2.81519344806444e-13	5.72354526852852e-12	19.9156718831456
NDC80	3.80882713318199	-0.652375880887275	9.667217878728	2.88398648434284e-13	5.85126823050056e-12	19.89163729895
DONSON	1.17539872429202	0.0815321851456605	9.66291401565187	2.92801728341037e-13	5.93445819416338e-12	19.8765531198269
MAP6	-1.31192238150738	-0.179084642963874	-9.66172269926213	2.94032448350073e-13	5.95324582150111e-12	19.8723774434317
NUDT1	2.1387825496005	-0.0213956030614684	9.65734784822196	2.98596941311202e-13	6.03942358385784e-12	19.8570418737077
RNF152	-1.76949383042171	0.0324387922654269	-9.6539537721681	3.02187331480347e-13	6.09945366599723e-12	19.845142894154
PSMD8	1.05270074461863	-0.0539839385427607	9.65056902620348	3.0581122584708e-13	6.16624919277462e-12	19.8332753971953
ADCY3	1.10921082067751	-0.130904595709805	9.64866140940184	3.07872908576561e-13	6.20144001561359e-12	19.8265864276211
TMEM72	-2.99960767246909	-0.43194687540958	-9.63916835448712	3.18343066912932e-13	6.40575540906218e-12	19.793293694155
APOC3	-2.13663336943505	0.330300759691697	-9.62737078094666	3.31857030752222e-13	6.6640019935582e-12	19.7519054819902
TJP3	-2.16414140434619	0.230640659771585	-9.6264457380539	3.3294081137083e-13	6.67209300823813e-12	19.7486596229085
TRNAU1AP	1.224128680749	-0.102260854137182	9.62112589207739	3.39243216925953e-13	6.77911717638861e-12	19.729991186989
IL2RG	1.83218425483704	0.221043864278083	9.62106249504351	3.39319044340896e-13	6.77911717638861e-12	19.7297686955979
KCNS3	2.09603654127923	0.0800455749859115	9.61989808565206	3.40714806404826e-13	6.80007076448899e-12	19.7256821340801
C16orf89	-3.39710141209618	0.000508553749268886	-9.61875770540278	3.42087378245646e-13	6.82051935527611e-12	19.7216797646478
WWC3	1.18656950553853	0.0422328940150395	9.61448124802712	3.47284423351185e-13	6.91710102973564e-12	19.7066695394185
KLK7	-2.52277145796644	-0.043548459285773	-9.61120638776975	3.51318045635243e-13	6.99033743797474e-12	19.6951735754836
NCAPG2	2.02813337257427	-0.254975993016732	9.59919435256957	3.66522044522125e-13	7.27808059836791e-12	19.6529971870301
PDZD3	-2.67226024654832	0.0353321371043487	-9.59541340223656	3.71443728831128e-13	7.36834579085149e-12	19.6397184401874
OGDHL	-2.91070258850124	-0.343363848747406	-9.59354879898666	3.73895382386052e-13	7.4094798780427e-12	19.6331693730878
CADM4	-1.57527973762985	-0.0719198979220771	-9.58753425064658	3.81915340986343e-13	7.55313700100034e-12	19.6120419050793
ANGPTL2	1.73389313266728	-0.0373316990081233	9.58291490673935	3.88192523631784e-13	7.66954160348723e-12	19.5958128188001
CAPS	-1.48815313031694	-0.117001106337111	-9.58041926926714	3.91627013476239e-13	7.7296050726292e-12	19.5870439895105
AKR7A3	-1.84272332128865	-0.105363494240853	-9.57869317213879	3.94020377778783e-13	7.76901950109292e-12	19.5809786819677
CHGB	-2.70847986066551	-0.0309209251338939	-9.57344363941679	4.01390298435228e-13	7.87571923590885e-12	19.5625304982983
AGXT	-2.38950895411325	-0.0646012483302262	-9.57340781393536	4.01441069272562e-13	7.87571923590885e-12	19.5624045885494
SOAT1	1.25534507359361	0.0318893384193264	9.57263262118513	4.02541237798649e-13	7.88940571961573e-12	19.5596801168929
TSPAN33	-1.52199267945196	0.0636014606520616	-9.55606184840368	4.26800042147376e-13	8.33152791438886e-12	19.5014258292999
TYMP	2.22959668479388	-0.136630112411114	9.55545736634198	4.27712329270339e-13	8.34102879738245e-12	19.4993002377679
AGMAT	-1.843867880661	-0.203310029978035	-9.55109327725043	4.3435725012751e-13	8.45379120680145e-12	19.4839532858578
C5orf46	4.53066550680242	1.58676740354079	9.54908960903324	4.37442889081443e-13	8.50539998324126e-12	19.4769064283831
IL2RB	2.67534083886948	-0.515118885409719	9.54788176591353	4.39313631826777e-13	8.53330809729733e-12	19.4726582675457
ZXDA	1.12394255486306	0.0344219335988941	9.54639158174012	4.41632794890314e-13	8.5698625218369e-12	19.4674168617175
KLHL13	-1.69876545247487	-0.214911367844228	-9.54541185096754	4.43164266618221e-13	8.59013233286263e-12	19.4639707406444
UHRF1	3.76786221708693	-0.471093457502136	9.54496582982275	4.43863240205067e-13	8.59013233286263e-12	19.4624018653268
C15orf59	-1.69119287868197	0.0939451380693189	-9.54488358676276	4.43992247216176e-13	8.59013233286263e-12	19.4621125738413
GPI	1.01081280308634	0.117749260321676	9.54394380156593	4.45469088175288e-13	8.61020577825194e-12	19.4588068118342
AK094644	-2.22261467982923	0.301053828342875	-9.53822052755908	4.54570596754264e-13	8.76020563007555e-12	19.4386727923822
BCL6	1.31729797965122	-0.124733955018005	9.5290344086336	4.69572712969849e-13	9.04042789930851e-12	19.4063496175341
HAUS1	1.06242947341028	0.0049252307139257	9.52738321203204	4.72321808009937e-13	9.08443092756305e-12	19.4005386236635
PKM	1.2516914462904	-0.0522049545307996	9.5245153228699	4.77135223092923e-13	9.16801297784137e-12	19.3904450950488
MAP4K4	1.24475363509764	-0.0992071626284219	9.52311609121561	4.79501594767553e-13	9.20445813501397e-12	19.385520192179
ARHGAP24	-1.59919844462777	-0.263283026613221	-9.52006822218118	4.84697183131845e-13	9.29508815283858e-12	19.3747918434959
PRR5	-1.18449195514986	0.229033959854402	-9.51774891561673	4.88688826941993e-13	9.36247538537256e-12	19.3666273518542
MR1	1.12471619180602	0.00521271510325227	9.50006679624014	5.20230895103877e-13	9.91829310616817e-12	19.3043638836562
CNDP1	-3.05456002683347	-0.345696681705714	-9.49693707673559	5.26024036510842e-13	9.99955876971484e-12	19.2933399315501
CD99	1.22638625278301	0.0423393672259898	9.49147054935679	5.36299131842913e-13	1.01850064777028e-11	19.2740825069588
PHF19	1.79961610420829	-0.405277714925299	9.48007471440819	5.58374711235709e-13	1.05837388447859e-11	19.233927464029
PCDH9	-2.71268127603248	-0.361617645567163	-9.47315545157599	5.72223266139186e-13	1.08357524570646e-11	19.2095398094365
BCR	-1.01705755680217	-0.0559912617243867	-9.46922813939586	5.80237137604115e-13	1.09768992856207e-11	19.195695402625
DEK	1.03017441442505	-0.116614304847796	9.46759994314884	5.83592648553105e-13	1.10297322266078e-11	19.1899552844088
ARHGAP25	1.67609993573734	-0.264268687138182	9.46329241457927	5.92564599795529e-13	1.1177905013796e-11	19.1747680118345
ZNF300P1	-2.46524603312553	-0.470254992339391	-9.46328828889949	5.92573259315986e-13	1.1177905013796e-11	19.1747534648028
RGS10	1.49821596113001	0.0701553212521371	9.46159113877598	5.96146306366603e-13	1.12236997679914e-11	19.1687692127586
IAH1	1.17806400683143	-0.173577769327566	9.46077525401695	5.97871730630737e-13	1.12453820044451e-11	19.1658922495529
CLCN5	-1.79653154281082	-0.0845614406960561	-9.4590336256894	6.01571773862434e-13	1.13021004087744e-11	19.1597507119913
TYMS	1.88968116551317	0.0925194392713323	9.45881373970886	6.02040554454841e-13	1.13021004087744e-11	19.1589753017142
IPO13	-1.20101561472048	0.101037443634757	-9.45756112027819	6.04718080871752e-13	1.13415020736894e-11	19.154557945244
ADCY7	1.74729461496015	0.158399300676518	9.45602806637229	6.08011394290396e-13	1.13923664595578e-11	19.1491514191847
PCNA	1.24776856983428	0.0519715173241555	9.45426539266778	6.11820336020378e-13	1.14418576008238e-11	19.1429348097813
PRC1	2.84089461380366	-0.364839665822292	9.44812056500697	6.25287765733574e-13	1.1682569037762e-11	19.1212607044131
PLP2	2.05006593117435	0.14267287376147	9.44633627703221	6.2925405045164e-13	1.17343007942928e-11	19.1149664204505
LYPD6B	-2.62684208232904	0.149784855663321	-9.44506691399606	6.32091145186841e-13	1.17760022381339e-11	19.1104883962466
GYPC	1.25670898751612	0.0379368188035769	9.444428620788	6.33522634764305e-13	1.1791462600898e-11	19.1082365807348
MSRA	-1.73828215361243	0.0860476068560282	-9.44364520852452	6.35284049342917e-13	1.18130285418139e-11	19.1054727471774
CD70	3.56289336601432	0.332754824443719	9.4394999295932	6.44686770077814e-13	1.19651666730635e-11	19.0908473979565
G6PC	-4.12133348002958	-0.38308412528177	-9.43922974367173	6.45304480827498e-13	1.19653003971032e-11	19.089894068682
LPGAT1	1.31131584739246	-0.109561886784423	9.43493885872594	6.55194871558624e-13	1.2125745314143e-11	19.0747530287771
CPEB3	-1.14460801587302	-0.0412270429316944	-9.42943470841033	6.68105944684148e-13	1.2329763097801e-11	19.0553280511319
EMR2	1.93434505041033	-0.452296119600885	9.42133325048549	6.87577719860284e-13	1.26533668840767e-11	19.0267311757744
C1orf226	-2.11749245509298	-0.313669844997417	-9.41478927118911	7.03723180509869e-13	1.2926214259431e-11	19.0036270883922
TRIM9	2.48310307508576	-0.181328089406023	9.41377845147594	7.06250960640907e-13	1.29604986681659e-11	19.0000579142558
EOGT	1.40350934733166	-0.0244394080137072	9.41252090721981	7.0940851370039e-13	1.30062651637174e-11	18.9956174185672
KIAA0226L	1.97180171376495	-0.133044826918849	9.40983466939312	7.16201114638106e-13	1.31185286409273e-11	18.9861315476835
MEF2C	1.92717776907264	0.000203503002791086	9.40748869214332	7.22186933284286e-13	1.32158185858438e-11	18.977846636015
AK055981	-1.63637053304068	-0.00753256270705791	-9.40368377230864	7.32002720170354e-13	1.33829489856518e-11	18.9644082265234
LMNB1	1.58175863840486	-0.0293227583781069	9.40249149452701	7.35106107038925e-13	1.34271617817856e-11	18.960196977884
PPP2R2B	-1.02812925489749	-0.0925919944540687	-9.40159077801134	7.3745938051784e-13	1.34576037232487e-11	18.9570154585522
FLJ32255	2.00651538137076	-0.165574188218299	9.39438695620059	7.56555961894673e-13	1.37804277854774e-11	18.9315671027587
CTH	-1.77521658229047	-0.0903479781236905	-9.38983766144812	7.68871737113453e-13	1.39917522522624e-11	18.9154934812598
CEP55	3.82967141701647	-0.364790425990276	9.38235520889829	7.89569346007197e-13	1.43550738519435e-11	18.8890518573295
HEY1	2.60430267076406	-0.122249857999906	9.37437380318444	8.12266798134248e-13	1.47267679447349e-11	18.8608408169962
EPB41L5	-1.49230057677632	-0.152989378120544	-9.37437346407711	8.12267776328303e-13	1.47267679447349e-11	18.860839618253
KDELC1	1.85428775252115	0.0713861217581317	9.37057202301701	8.23308440854813e-13	1.49131442997352e-11	18.8474008129525
NRP2	1.33558026170277	-0.172229188732608	9.36323317874211	8.4505276101755e-13	1.52928800214062e-11	18.8214525273386
BNIP2	1.11126021995273	-0.0340995383547357	9.36287464032304	8.46129789180044e-13	1.52982451458853e-11	18.8201846885322
GEMIN5	1.09440812791775	0.0540359271544428	9.35908899453948	8.57586437350652e-13	1.54768292685409e-11	18.806797364376
CD3D	2.71005819102505	-0.0535808556033977	9.35608171539114	8.66798848859938e-13	1.56286942399319e-11	18.7961615865834
ATP2C2	-1.57771347772687	-0.30869139005359	-9.35169362129447	8.80420514854584e-13	1.58451438665151e-11	18.780640690065
CD52	2.51467576764314	0.231312104552766	9.34950230377891	8.87303460536813e-13	1.59543674523495e-11	18.7728891767191
GRAMD1B	-1.82719873247746	0.223973889431882	-9.34790514730887	8.92354296027437e-13	1.60172563228279e-11	18.7672391324427
ARL6IP6	1.03830318807528	-0.122194294328802	9.34787953510381	8.9243552755386e-13	1.60172563228279e-11	18.7671485255391
SAMD9	1.44277298231816	-0.057786035300837	9.3474206348085	8.93892237134632e-13	1.60287227407151e-11	18.7655250878621
EXOSC9	1.13223632983336	-0.0832610516026441	9.34714483824387	8.94768864558082e-13	1.60297760296836e-11	18.7645494006078
PEBP1	-1.04356100699278	-0.0389709873799052	-9.34555346867413	8.99844033458296e-13	1.6105975535844e-11	18.7589194543174
TMEM154	2.25316794979829	-0.342008532817907	9.34498378996989	9.01667888353461e-13	1.61238950217513e-11	18.7569039840059
SUSD4	-2.87307065440559	-0.332850699109199	-9.34379349465765	9.05490715208133e-13	1.61774954670594e-11	18.7526927254653
SLC25A43	1.54805735140835	-0.15514821241346	9.33864776788329	9.22205951180977e-13	1.64611242597413e-11	18.7344855482258
SLC1A3	2.33406270407744	-0.24634136122558	9.33188319449198	9.44654029292548e-13	1.68464734486848e-11	18.7105463833692
CLDN16	-3.46607137411066	-0.392630515308009	-9.33103226084742	9.47516565300137e-13	1.68821610575613e-11	18.7075346903996
E2F8	3.87017778543705	-0.290570444756232	9.32905728320766	9.54194123987453e-13	1.69856954005723e-11	18.7005444133072
GK	-1.92755819705668	0.0162174381721377	-9.32741754762807	9.59774232793437e-13	1.70529153101956e-11	18.6947404049243
TNFAIP8	1.82791641242438	-0.200981507288785	9.32718139878016	9.60580565460276e-13	1.70529153101956e-11	18.6939045104469
ARRDC2	1.93684345461029	-0.218117856452442	9.32438463036787	9.70182254913707e-13	1.72077846281029e-11	18.684004387759
ACADM	-1.23623675942678	-0.106329200372431	-9.31605419418791	9.99358933498174e-13	1.76772885718689e-11	18.6545113563903
ZC3HAV1L	2.39032420118343	-0.472502348284728	9.31477684376258	1.00391031218001e-12	1.77278917177235e-11	18.6499884247336
DNAJC12	-2.06994341255166	-0.166912137647342	-9.31474367722205	1.0040287671143e-12	1.77278917177235e-11	18.6498709841806
RP11-134G8.8	2.20106402472527	-0.163263292305164	9.31192688831238	1.01414056444093e-12	1.78742274482714e-11	18.6398965220693
SLC7A9	-2.77994492652113	-0.147824406281486	-9.30915876530637	1.02417767005343e-12	1.80349129877602e-11	18.6300936261499
RIMBP2	-1.71348309270036	0.126035968709134	-9.30650024780525	1.03391161009215e-12	1.8157377819172e-11	18.6206781699084
TMPRSS4	-3.5974154178407	-0.0520018161512633	-9.30205421339069	1.05039924251333e-12	1.84139309069935e-11	18.6049304523563
HYAL1	-2.37619354695323	-0.428366987665472	-9.30173552800959	1.0515911821986e-12	1.84183517246741e-11	18.6038016036945
NPTX2	5.66186358022032	0.208540353803618	9.30113134071083	1.05385469340865e-12	1.84362656560276e-11	18.6016614215117
C14orf37	-2.62757666433521	-0.412200444840642	-9.30096057873935	1.05449532121062e-12	1.84362656560276e-11	18.6010565334799
CCND2	1.82572638713152	-0.209013357256238	9.29672646097017	1.07050612100817e-12	1.86828579391266e-11	18.5860571521803
CHPF2	1.41032628333472	-0.20414568513351	9.29366671019245	1.08222851417344e-12	1.88706375883321e-11	18.5752168735177
NINJ2	2.8628291147109	-0.309197298884753	9.2802227547676	1.13528718913207e-12	1.9743117675066e-11	18.5275758845703
CRYM	-2.21494761920115	-0.319273525104806	-9.27876250771838	1.14120592217427e-12	1.98284528977779e-11	18.5224001789974
KIAA1522	-1.19018517044572	-0.131167170454976	-9.26819710492603	1.18496695279532e-12	2.05458156537195e-11	18.4849459091801
RBM3	1.17592942125716	-0.111069138739199	9.26779724924434	1.1866559412455e-12	2.05458156537195e-11	18.4835282097664
MFSD4	-2.30254365618233	0.114963914195395	-9.26701639550205	1.18996126282683e-12	2.05843343249277e-11	18.4807596261722
DYRK2	1.27276805260711	-0.0679794011450622	9.26387981752804	1.20333203546024e-12	2.07972703377294e-11	18.4696380219369
CASP2	1.09135056512398	-0.0979300395357847	9.26288683000122	1.20759647449447e-12	2.08342282602263e-11	18.4661169102619
ELF5	-3.38419438704725	0.219916568459585	-9.26098282744902	1.21581596919954e-12	2.09575876696057e-11	18.4593650908189
LSP1	2.42326829651385	-0.0613447951367543	9.26016237716851	1.21937517884895e-12	2.10004693587527e-11	18.4564555676939
MSC	2.32608607367053	-0.0823765204750255	9.25720077434592	1.23231055954369e-12	2.12046133946416e-11	18.4459524336409
ANGPT2	3.44702100100651	0.312112529399533	9.25615793021244	1.23689823583236e-12	2.12648846702442e-11	18.4422538507437
TCF4	1.78815560507068	0.100132518858012	9.24812312825041	1.27282706299309e-12	2.18633984290986e-11	18.4137538311959
AGPAT3	-1.03577370034715	-0.00744853968886144	-9.24375406286122	1.2928036238937e-12	2.21870912650549e-11	18.3982538116969
NUP155	1.1194322535544	-0.000525749323459659	9.23122521966961	1.35185886229825e-12	2.31600365753351e-11	18.35379530748
GYLTL1B	-1.18848872205385	-0.107006851238372	-9.22689613181945	1.372890147679e-12	2.34792966879238e-11	18.3384300449282
NEDD4L	-1.2054630561358	-0.0860924903401373	-9.22415608225463	1.38637177088642e-12	2.36346111942001e-11	18.3287038328669
MAFB	1.31444172241928	0.0701431330959987	9.22407042001592	1.3867953912613e-12	2.36346111942001e-11	18.3283997503837
ZNF217	1.11370665552129	-0.0158101263520134	9.2226236642939	1.39396968541223e-12	2.37362396736702e-11	18.3232639725701
SLFN5	1.68111721368108	-0.154776596855335	9.21893826556776	1.41241461481211e-12	2.40294392671029e-11	18.3101804182436
RPS6KA6	-1.81257269552563	-0.337131111164477	-9.21855320957891	1.41435590546966e-12	2.40415970436252e-11	18.308813353399
FMO5	-2.093621698118	-0.202318512114427	-9.21754291434129	1.41946218304584e-12	2.41074864172578e-11	18.3052264328934
RP1-78O14.1	-3.16968963835176	0.0140465267138043	-9.21514390360424	1.43166193054296e-12	2.42936295902263e-11	18.2967086670379
RAB11FIP4	-1.52844857363893	-0.191995833314142	-9.21450389878338	1.43493438110395e-12	2.43280959647545e-11	18.2944362155295
IRX1	-2.64682872003264	0.00571811474182867	-9.21163496114934	1.4496966199027e-12	2.45571340133734e-11	18.2842490559028
RGS18	2.9562994832758	-0.473040199454659	9.19797471380739	1.52211314391782e-12	2.57393403862341e-11	18.2357327700139
ADAP2	1.36772747912406	-0.0249052977361437	9.1939546045938	1.54411121406671e-12	2.60888238659426e-11	18.221451384645
COL6A2	1.79335704159355	0.0995899823560521	9.19358463238735	1.54615173493923e-12	2.61007991843875e-11	18.2201369855923
FERMT1	-1.49924805709022	-0.0809336834384181	-9.19230415628776	1.55323499110297e-12	2.61978077372006e-11	18.2155877413695
SLC27A2	-2.44941392234224	-0.111433792036263	-9.19078171754279	1.56169928812556e-12	2.63179229131323e-11	18.2101786543847
PEG3	-1.99563196099932	-0.119100420363096	-9.1893659561878	1.56961219838366e-12	2.64277081761975e-11	18.2051483839371
SLFN12	1.29345106199223	0.0232704771223702	9.18819370484238	1.57619466236039e-12	2.64938586514591e-11	18.2009831718935
BATF	2.04745460736163	-0.42539390775198	9.18692376008515	1.58335709418069e-12	2.6591444463451e-11	18.1964706903062
PCK1	-3.30992981697122	-0.395635049498445	-9.17984051372848	1.6239121963181e-12	2.71793809868817e-11	18.1712990446732
MYH14	-1.04220460244657	-0.110978104027075	-9.17750687705468	1.63750139075663e-12	2.73834383595898e-11	18.1630049825709
RIPK2	1.16776706402859	-0.114229690561945	9.17569567533253	1.64812728827659e-12	2.75376357399257e-11	18.156567368372
CMC4	1.21467328751839	0.201739585548358	9.17358841722106	1.66057756224012e-12	2.77046686052679e-11	18.1490770787691
PTGR1	-1.0065269194882	-0.0227505109527738	-9.17352539771583	1.66095135523189e-12	2.77046686052679e-11	18.1488530682255
GIMAP4	1.85617040878726	0.196571653127855	9.17000686485082	1.68195621215003e-12	2.80311733009596e-11	18.1363454142931
DDIT4	2.46863448261807	-0.00976569379005074	9.16430481793702	1.71656610338403e-12	2.85836695498926e-11	18.1160733274661
MIR210HG	2.42312876493965	-0.0692781379878135	9.1623135595271	1.72882083675443e-12	2.87632933612479e-11	18.1089932205346
NR1I3	-1.89452147309288	0.177437717873072	-9.1614121923777	1.73439703774357e-12	2.88073271818288e-11	18.1057882012691
ACLY	1.29174901471371	-0.0151069069657947	9.15686801168581	1.76278629498682e-12	2.92538938149422e-11	18.0896291458645
SOWAHA	-2.72636573403893	-0.771785352432023	-9.14592281229331	1.83310258572482e-12	3.03950740927417e-11	18.0507001340889
HMX2	-2.36688915277164	0.160440239935679	-9.14539915337917	1.83653674946652e-12	3.04262753616181e-11	18.0488373427012
IL21R	2.2287977909654	-0.342190735555023	9.1447371097281	1.84088772293021e-12	3.04726000690111e-11	18.0464822437343
C1orf168	-2.45126771085218	-0.619316331534384	-9.13952833903017	1.87548427358849e-12	3.09668207902788e-11	18.0279515574998
PCSK1N	-2.58394085120808	-0.53875038166561	-9.13665898922533	1.89482153062993e-12	3.12597703525386e-11	18.0177424889207
PLCD4	-2.48658629443288	-0.028505099032501	-9.13480837287064	1.90739973459686e-12	3.14408136235189e-11	18.0111576360014
CASZ1	-1.2290537214107	0.0521165496156334	-9.12865747756863	1.94981361974466e-12	3.21076706566938e-11	17.9892692452325
RP11-410L14.2	-1.33809194612217	-0.0620552619012521	-9.12846845457941	1.95113198388297e-12	3.21076706566938e-11	17.9885965375411
DEPDC1	2.25832538743308	-0.476359699710012	9.12601837853108	1.9683018345194e-12	3.23359158883032e-11	17.9798767397595
OAS2	1.64934373683085	-0.0607805680690324	9.12075280478449	2.00571933493752e-12	3.29230261687107e-11	17.9611347108262
ACKR3	2.24249886353928	-0.0700802860792848	9.11808436080338	2.02495427005811e-12	3.32109445513547e-11	17.9516357905343
IL15	1.25826701785086	0.029129818948618	9.11271201811326	2.06424536144153e-12	3.38111179686515e-11	17.9325097245187
GJA1	2.1761608141658	0.234429927678491	9.10600589133926	2.11437095899548e-12	3.45906147123141e-11	17.9086314814056
CYBB	1.56100265486978	-0.334144327649873	9.10180102315157	2.14642440865536e-12	3.50564766543636e-11	17.8936572371954
PLOD3	1.03546197370338	0.202869455262286	9.07498391382107	2.36269155768029e-12	3.84203076667309e-11	17.7981184392789
MTHFD2	2.33653507785833	0.0751218214548642	9.07434938947936	2.36806631263895e-12	3.84203076667309e-11	17.7958570744923
RFC5	1.1548479980663	-0.132996114373741	9.0735345787934	2.37498625666929e-12	3.85007077290831e-11	17.7929531375207
APOBEC3B	1.82294712501174	0.0534919404527097	9.0655486100724	2.44389645106331e-12	3.95850632598262e-11	17.7644883857078
HRASLS2	-1.18109080856756	-0.0243868170056747	-9.06449625957953	2.45312606040477e-12	3.9668991466892e-11	17.7607370079134
GZMH	2.58643494499306	-0.128145407952347	9.06350170904076	2.46188101059225e-12	3.97449801701791e-11	17.7571915796943
NEK2	2.37140641356507	-0.147173654708006	9.0509712892465	2.57492007406019e-12	4.15244549094138e-11	17.712514687064
WNK4	-2.82144986701856	-0.136064275158653	-9.05081716536771	2.5763425261415e-12	4.15244549094138e-11	17.711965072848
CENPL	1.42074778357049	-0.043709092476752	9.04993025300028	2.58454348492687e-12	4.162240571987e-11	17.7088022524551
ACSM3	-1.71094679679428	-0.228866747271825	-9.04640718134957	2.61738060487998e-12	4.20689673440179e-11	17.6962379084377
GZMK	3.57554617842863	-0.0733135865455119	9.0462652578332	2.61871218734128e-12	4.20689673440179e-11	17.6957317423138
EPM2A	-1.08178332176104	0.0271869149133452	-9.03944004154885	2.68356117532231e-12	4.30754426495839e-11	17.6713876376708
SULT1C2	-2.06461550375239	-0.333163511953458	-9.03875585675292	2.69015043927352e-12	4.31458743529638e-11	17.6689470610171
SLC51B	-3.63560896489441	-0.468571766760319	-9.03748594995793	2.7024239207665e-12	4.33072824391682e-11	17.6644170244646
RHNO1	1.05985305852	-0.0145983281235324	9.0242292668913	2.83396558117065e-12	4.53041528755005e-11	17.617118775252
TOX3	-2.58031997261778	-0.767821556203084	-9.02345949113627	2.84179901006553e-12	4.53923543588218e-11	17.6143718183902
RARS	1.45915830527738	0.0181358992854717	9.02180704640621	2.85868844197456e-12	4.56249468845761e-11	17.6084748622483
GGACT	-2.42093507395772	0.0708667366653933	-9.015039520508	2.92892012095507e-12	4.67078156636276e-11	17.584321520997
GCDH	-1.07279565774236	0.226154921803624	-9.00527893467057	3.03328579013838e-12	4.83328196755464e-11	17.5494786503454
HMGCS2	-2.32808367431046	-0.36710168927827	-9.00272423161455	3.06121537796195e-12	4.86697910232478e-11	17.5403575773349
FAM114A1	1.01421250102728	0.0569360087495304	9.00266341788318	3.06188337831852e-12	4.86697910232478e-11	17.5401404465203
APOM	-2.69438029653573	-0.260185941240917	-9.00103844645017	3.07978714187505e-12	4.89147068019522e-11	17.5343384861726
FRMD6	2.04655557986608	0.00901541201058352	8.99902477312758	3.10211995854937e-12	4.9229513415068e-11	17.5271483366035
SHISA3	-2.5180092296855	-0.7596964707917	-8.99332069123059	3.1662710688592e-12	5.02069147884883e-11	17.5067790047747
EMX1	-2.20500029670916	-0.237251103553231	-8.99063526653234	3.19693376779786e-12	5.06521462530884e-11	17.4971883173051
NCF2	2.46824249641784	-0.363299588661205	8.98727984158634	3.23566736323991e-12	5.12244302521316e-11	17.4852038932304
CD2	2.82908742385111	0.214268220661088	8.98590773909236	3.25164217808168e-12	5.14033073251363e-11	17.4803029248538
CPN2	-4.22141282934746	-0.172700993487015	-8.98386945414897	3.27551985568534e-12	5.16883362734114e-11	17.4730221303726
ESRRB	-1.65039914012937	0.110865407904729	-8.981724662897	3.30083593488404e-12	5.20459239644346e-11	17.4653604925753
COL4A1	1.81238564486108	0.0774723954429959	8.97860264713921	3.33803935935036e-12	5.25902197780609e-11	17.4542072731253
MDM2	1.13633034474052	-0.0957162659294806	8.96842254152478	3.46230974387323e-12	5.44605206020638e-11	17.4178334075807
MT1G	-2.53333545479422	-0.548288126706052	-8.96431135433323	3.5138071848769e-12	5.51819767759634e-11	17.4031413837311
GAPT	2.22796748164167	0.0385605467499504	8.96383123345257	3.51987135264324e-12	5.52329532749839e-11	17.4014254926285
MICB	1.43594354447502	0.206333336904148	8.9614811032589	3.54970709717711e-12	5.56565675180594e-11	17.3930261306664
WDR54	1.57209785163955	0.0107256334310721	8.96050419365127	3.5621841392509e-12	5.58075515149308e-11	17.3895345130995
FAP	3.19807438902977	-0.565931426516859	8.94237899293352	3.80186029633718e-12	5.93253662005672e-11	17.3247370969452
ZGPAT	-1.91556577240735	0.446179636205808	-8.94059235014496	3.82634802392282e-12	5.96599800484196e-11	17.3183482979787
FREM2	-2.60554476495726	-0.615583296908754	-8.93748858578867	3.86926650658677e-12	6.02333234810120e-11	17.3072489786989
PAQR5	-1.58903900865058	-0.212703249423674	-8.93252798710651	3.93887006877122e-12	6.12681860935294e-11	17.2895077089534
TYRO3	-1.58565879389317	0.125125362183274	-8.93077675826794	3.96374207046172e-12	6.16061703719106e-11	17.2832440334564
PRR15L	-2.47484884853127	-0.583493700264746	-8.92444134880081	4.05504992550193e-12	6.29753751901048e-11	17.2605817309826
SIGLEC1	2.21591187741745	-0.193270685340301	8.92196996664987	4.09123994111735e-12	6.34368762705372e-11	17.2517404334859
SEMA6D	-1.67291861295632	-0.0910537022919142	-8.91081895096463	4.25861943781789e-12	6.59799860567533e-11	17.2118413739406
KCNJ2	2.76882851181937	0.288644117431714	8.90723273626367	4.31390180744665e-12	6.67836978863719e-11	17.1990073638671
MARVELD3	-1.79934995895931	-0.150538073933278	-8.90637643778279	4.32720839056314e-12	6.69368249776219e-11	17.1959427576078
LXN	1.49077183657288	-0.00385921551805566	8.89146207767249	4.56571673145349e-12	7.0514958408004e-11	17.1425555669545
FAM184A	-1.49963793976261	-0.00903753485799621	-8.88982814752414	4.59263818749484e-12	7.08748943596153e-11	17.1367056090296
GXYLT2	2.41853359802324	0.160556922074987	8.88319468169045	4.70358640993795e-12	7.24729481512374e-11	17.1129534555962
CDKN1C	-1.71649860221263	0.217063266748045	-8.88222587785461	4.72001451680963e-12	7.26689430596638e-11	17.1094841859922
GJB1	-1.8145298414753	-0.286956495741171	-8.88022999982891	4.75404118272988e-12	7.30780024629983e-11	17.1023367271518
SERPINC1	-2.48549804115838	0.461227433933998	-8.8786159160087	4.78173941504746e-12	7.34461683350432e-11	17.0965562648954
TES	1.1774259536216	-0.102074297913574	8.87633746459024	4.82111524876538e-12	7.39929818015291e-11	17.0883961450965
MDFIC	1.07662881623277	-0.095560508688232	8.87413646494049	4.85946259774381e-12	7.45231670212683e-11	17.0805129904011
CD74	1.37681901372768	0.020648186206976	8.86937607500696	4.94345525881176e-12	7.56337077419608e-11	17.0634616395963
PLXNC1	1.26594907643023	-0.146039975706308	8.86588575894383	5.00596613529074e-12	7.64707172919433e-11	17.0509583628788
HAGH	-1.32816697593467	0.204404507444653	-8.86296828163145	5.05882790944696e-12	7.72180437673294e-11	17.0405063536816
EGLN1	1.24767935039371	0.0540477362557212	8.86196068066039	5.07721491800234e-12	7.74383931345742e-11	17.0368964036194
IL13RA1	1.0181101143648	-0.00154178158513496	8.85480576727949	5.20973000425391e-12	7.93977436651418e-11	17.0112598765163
EGLN3	3.63065641225228	0.308892163755048	8.8494097430484	5.31196796320671e-12	8.08929759991362e-11	16.9919226822473
GRAMD4	2.03582368004191	0.191190017074939	8.84723907477512	5.35366302085948e-12	8.14646285293673e-11	16.984143176819
PIK3R5	1.66117715598904	-0.258452317372131	8.84505094870798	5.39602694727228e-12	8.2045564111396e-11	16.9763006993053
CCDC127	1.06070782524233	0.0661967719946987	8.84470099238359	5.40283363007856e-12	8.20853769890773e-11	16.9750463807968
CSDC2	-2.66549605552546	-0.477604522163303	-8.8366368805202	5.56209880700186e-12	8.44396394410763e-11	16.946140001299
CCL28	2.70501356037392	0.0216943564008107	8.8353802202793	5.58733994234186e-12	8.47571792027539e-11	16.9416349183773
CAMK1D	1.75986377308989	-0.371231667096926	8.83183467880304	5.65917876028777e-12	8.57805448746172e-11	16.928923557582
NME1	1.20547078761916	0.163697793047631	8.81975666885227	5.91095391241569e-12	8.93894951616011e-11	16.8856139173641
AIF1L	-2.33116872308247	-0.408659596789429	-8.81547685772695	6.00285088085228e-12	9.07092323930793e-11	16.8702643188552
CENPW	1.66340142526492	-0.0165428424137397	8.80899979476505	6.14467099995338e-12	9.27807449368924e-11	16.8470313299238
CCNE2	2.2864468911724	-0.279315952674462	8.80839856925067	6.15800517295003e-12	9.29105029904909e-11	16.8448745779456
CNRIP1	1.52972188912747	0.138506590429315	8.80684359771189	6.19262709434951e-12	9.33609987862739e-11	16.8392963513794
CCL4	3.1896044386036	-0.357146662895064	8.79949960088285	6.35881073810044e-12	9.57927222567491e-11	16.8129481410283
PRSS22	-1.07051688419733	0.0310985406299404	-8.79638364273496	6.43067001604788e-12	9.68008461171448e-11	16.8017675958192
RP11-297L17.2	-3.01800482503936	-0.472658979814564	-8.79478053616852	6.46795830592112e-12	9.72128181271074e-11	16.7960150841991
ROGDI	-1.23027678889661	0.0867082524041848	-8.79452982730881	6.47380944969264e-12	9.72262003099816e-11	16.7951154331009
PANX1	1.17621769252136	0.014240104676204	8.78792765895099	6.62982627783369e-12	9.94930820974445e-11	16.7714221391481
LCK	2.5924991845601	-0.150589126893406	8.78767065071628	6.63597564072933e-12	9.9509171065535e-11	16.7704997370204
DDX26B	1.13695378803273	-0.0609574092143064	8.78418556559154	6.71993136328394e-12	1.00537354800765e-10	16.7579912324333
LILRA2	1.67047130274373	-0.235379386755072	8.7756662763601	6.92969101920788e-12	1.03394835742099e-10	16.7274099716553
PUS7	1.22912693417385	0.185915158274089	8.77515243601891	6.94255140969411e-12	1.03399499426425e-10	16.7255652735528
CCDC64	-1.47985831074774	-0.200465370930485	-8.77513883876122	6.94289204781754e-12	1.03399499426425e-10	16.7255164588038
ATL3	1.25892376253554	-0.0822687916650657	8.77477217776249	6.95208397576409e-12	1.03424849280348e-10	16.72420012406
PTPN13	-1.25811005999342	-0.112677939956678	-8.77465005236162	6.95514829080561e-12	1.03424849280348e-10	16.7237616841649
COL1A2	2.63458807074007	0.0335310337029013	8.77220698165343	7.0167351826331e-12	1.04261556364235e-10	16.7149906081259
CD44	1.53925342831314	-0.0923286017887849	8.76686542219358	7.15330871436519e-12	1.05891522700029e-10	16.6958117108157
SLC16A1-AS1	1.88848132873496	-0.474127837147033	8.76686012850875	7.15344538266431e-12	1.05891522700029e-10	16.6957927026497
C16orf54	2.17389387685231	-0.0223918703051756	8.76465431708626	7.21062268381744e-12	1.06657353947274e-10	16.6878720404683
PARP12	1.11889618242837	0.0121387146642292	8.76375212537633	7.23414094322546e-12	1.06924531181203e-10	16.6846323213362
CENPK	2.97915901749426	-0.318454899125981	8.76246140597758	7.26792163379905e-12	1.07342875735364e-10	16.6799973053354
CEACAM1	-1.18777783305247	-0.169318334616156	-8.76152137925227	7.29262389607312e-12	1.07626608237302e-10	16.6766215523869
RAD51AP1	2.36990082631845	0.00188897936331832	8.75964794576591	7.34210681154345e-12	1.0827535846459e-10	16.6698936037588
SLFN13	2.84273865401158	-0.0772540897430561	8.75465393872452	7.47567100486673e-12	1.10079395961219e-10	16.6519575247442
FCAMR	-3.40416628663003	-0.6732443246337	-8.74889257440613	7.6327997058818e-12	1.12308739816500e-10	16.631262936174
CST7	2.44353702302156	-0.0540285669694786	8.74724395373642	7.67837101875947e-12	1.12894518827207e-10	16.6253406592263
PBK	2.36758105043337	0.157339429054263	8.73833578471715	7.92939190760514e-12	1.16410600746931e-10	16.5933363606784
PLIN3	1.33097520505403	0.0699013789936025	8.73280962069618	8.08924740255569e-12	1.18579775499393e-10	16.5734793252118
HOXA6	-1.2075292132354	-0.0984830943959476	-8.73113604156292	8.13829608330052e-12	1.19120586211058e-10	16.5674652049564
DUSP15	-1.69381292037957	-0.116857015686637	-8.72947867120603	8.18716474531029e-12	1.19746449136818e-10	16.561509108911
ARL4A	1.41031396222901	0.217938293602765	8.72886398557143	8.20536415231271e-12	1.19923140955389e-10	16.5593000551765
B9D2	1.25275886663263	-0.0845019050753241	8.72192696146311	8.41359808133076e-12	1.22783401932987e-10	16.5343677042215
CCND1	2.06307244323067	0.455412156214101	8.72137545016489	8.43037972157052e-12	1.22936765002277e-10	16.5323853516527
SNX20	1.45627633010675	0.152605424748914	8.71912593333895	8.49917874789431e-12	1.23847884223034e-10	16.524299433411
PHKA2	1.53924400778524	0.0279493237712321	8.71484000933868	8.63182709895575e-12	1.25687354615478e-10	16.5088924966886
GBP5	2.71093965260167	-0.356064681747206	8.70867933209326	8.82615767389929e-12	1.28326308791359e-10	16.4867436603864
CLMN	-1.65537225549023	-0.326609154699467	-8.70539595506014	8.93152026367965e-12	1.29761946366092e-10	16.4749380382644
NUCB2	1.11811210228391	0.123261112319582	8.70390656517615	8.97973082029889e-12	1.30365736553361e-10	16.4695825439802
ARL4C	2.19107071182557	-0.0581332467505785	8.70215364432482	9.03680734824226e-12	1.31097251826943e-10	16.4632792276582
KCNJ15	-2.05457200702075	-0.416219424955386	-8.69358238906045	9.32119638906739e-12	1.35068285887383e-10	16.4324543816927
SLC22A13	-3.99638939361253	-0.140774659731961	-8.69348964914525	9.32432220039948e-12	1.35068285887383e-10	16.4321208287241
NR0B2	-2.74813373296175	-0.275845448798664	-8.69224935309991	9.36622809021191e-12	1.3557511398823e-10	16.4276598528983
CD53	1.56788786868313	-0.117446640035979	8.69106811784579	9.40631470990628e-12	1.36054879704394e-10	16.4234111875639
CELF2	1.20552142456902	-0.193275762800234	8.69049448390389	9.42584390084465e-12	1.36236810186323e-10	16.4213479018311
AHR	1.35169305473034	-0.0807778555505659	8.68932769476018	9.46569288743562e-12	1.36666602568333e-10	16.4171510343881
MAPK7	1.32802221375446	-0.198445569299157	8.68921571167073	9.4695263170466e-12	1.36666602568333e-10	16.4167482325514
RASA3	1.70420625524049	-0.113587464928234	8.6814455375322	9.73936799843721e-12	1.40251192800419e-10	16.3887965827673
KLRD1	1.81257249106344	-0.273633038441516	8.6809390974198	9.75722188725982e-12	1.40405133456979e-10	16.3869745997711
ZYG11A	-3.22304999975185	-0.351692392275193	-8.6779526931103	9.86317554443526e-12	1.41721684380782e-10	16.3762302168388
TPK1	1.31645243209648	-0.122121571576794	8.6774833292844	9.87993292724299e-12	1.41858465524568e-10	16.3745414917561
MT1H	-2.1749113773754	-0.421147477836051	-8.67273102533199	1.00512234727899e-11	1.44106751165478e-10	16.3574421893495
TMC4	-2.33424948492736	-0.576093992618113	-8.672437453175	1.00619023870425e-11	1.44154404154712e-10	16.3563858267104
IL15RA	1.06068842080883	0.0689427650053246	8.67133638887436	1.01020562752591e-11	1.44623959779988e-10	16.3524237993162
MBOAT2	-1.0638307087157	-0.14233652384141	-8.66986583570282	1.0155936414495e-11	1.45289195465465e-10	16.347132068662
IRF1	1.33910587032092	0.1505631525926	8.66772371028701	1.0234940456864e-11	1.46312617078101e-10	16.3394234062385
ALDH8A1	-2.90506235669717	-0.718550389393952	-8.66712994295744	1.025694855503e-11	1.46520360590403e-10	16.3372866085813
CMPK2	1.83253053245632	-0.0139484562259322	8.66125088663867	1.0477443846952e-11	1.49452272166239e-10	16.3161280851106
RGN	-1.6025046508166	-0.0627431634538005	-8.65994767022129	1.05269636387443e-11	1.49940378165515e-10	16.3114374869451
HVCN1	1.27741677655575	0.0937392331843247	8.65762174539391	1.06159305041043e-11	1.51080617980489e-10	16.3030655781321
NAPSA	-2.50204643530481	-0.344415468917434	-8.65745247985262	1.06224343883419e-11	1.51080617980489e-10	16.3024563090529
CNTN1	-1.79564661204447	-0.301488254100333	-8.64977384712341	1.0921735254209e-11	1.55224865298943e-10	16.2748148201415
PCBP1	1.00436861659041	0.146941890782161	8.64887706863548	1.09572392035586e-11	1.55616616775757e-10	16.2715863034351
TNFRSF1A	1.14650814004505	-0.0724516695050409	8.64656219160079	1.10494242413498e-11	1.56812212676478e-10	16.2632521622017
WNK3	-1.71984952791866	-0.404026702827087	-8.63758128868223	1.14145181406336e-11	1.618763683345e-10	16.2309147071572
CDH11	1.72020639853859	-0.221047715770423	8.63525558559791	1.15110263230598e-11	1.63126973901409e-10	16.222539550483
HLA-J	1.346992896165	-0.0876444914720696	8.63229497412654	1.16350697868359e-11	1.64765702855634e-10	16.2118774018482
IRX2	-2.58057617015063	-0.0915196376400042	-8.630851725335	1.16960257137461e-11	1.65389904735721e-10	16.206679536512
RASSF8-AS1	-1.80476714187204	-0.18128798609269	-8.61914822632969	1.22023448117872e-11	1.72300976920906e-10	16.1645234201023
GSTO2	-1.82356467904691	-0.325451324889053	-8.61638200848267	1.23252055866561e-11	1.73818075618561e-10	16.1545579391845
RHOH	2.34161530832764	-0.411006468036094	8.61633009670511	1.2327523093515e-11	1.73818075618561e-10	16.1543709180006
FDXR	1.49464772862954	0.0652915844031769	8.61517622675492	1.23791488605529e-11	1.7442051654779e-10	16.1502138480595
PAPPA2	-1.3373565071547	-0.0456038219592907	-8.6134253354406	1.24579020250528e-11	1.75152382918945e-10	16.1439056828428
BCAT1	2.26425161612426	-0.127297506633324	8.61120607529713	1.2558446791448e-11	1.7643942556673e-10	16.135909726996
PSMD10	1.00891391978542	-0.0258040268568135	8.61016028444311	1.26061095555901e-11	1.76982192822357e-10	16.132141630186
SLC2A3	2.96921890030191	0.0237318897804817	8.6061847995525	1.27889625989918e-11	1.79420814586715e-10	16.117816769087
ADH1C	-3.47429284569258	-0.118491134252674	-8.60385857435407	1.28971929745679e-11	1.80809789061914e-10	16.1094341251183
DGKD	1.14765083842573	-0.0769335886942918	8.59582167285734	1.32782618692931e-11	1.85886181697339e-10	16.0804696671634
NAT8L	-1.84373887647342	-0.143788689463581	-8.5955307435938	1.32922667471841e-11	1.8594941897078e-10	16.079421085491
RAB27A	1.28672620221905	-0.129547532610182	8.59504592849553	1.33156380127711e-11	1.86143501720614e-10	16.0776736766264
BRCA2	2.11883323911665	-0.452392178078332	8.59445994752273	1.33439413318421e-11	1.8640620539043e-10	16.0755616139483
TRHDE-AS1	-1.57624406361534	-0.222277814980159	-8.59211133266334	1.34579900022355e-11	1.87865488642317e-10	16.0670961944422
FAM198B	2.1371230272025	0.107718320272142	8.59039451568917	1.35419786347432e-11	1.8890337314045e-10	16.0609077824842
AKR1A1	-1.19228399960873	-0.0065845985851242	-8.5901696923556	1.35530162305747e-11	1.88922877029185e-10	16.0600973712586
RP11-274H2.5	2.10768033991382	0.363253843673687	8.5885792202811	1.36313586605074e-11	1.89745027263697e-10	16.0543641542659
CDKN3	2.27330478834436	-0.323381323844271	8.58659998675945	1.37294870795892e-11	1.9083987040629e-10	16.0472292916795
TIMP2	1.26981936666534	0.0138810352577854	8.58118603064327	1.40015521360248e-11	1.94345906737925e-10	16.0277112205423
LRP1B	-3.01009451226524	-0.711188606821197	-8.57927761013309	1.40987427595121e-11	1.95556446810812e-10	16.0208305707536
PPM1H	-1.41609868911137	-0.157867349128569	-8.5783307730684	1.41472142105664e-11	1.96089993856359e-10	16.0174167276252
PPP1R16B	-1.76601951487266	0.20826909409942	-8.57749070135736	1.41903603765079e-11	1.96549026868677e-10	16.0143877730625
NXPH2	-2.1128818430261	-0.120197965203867	-8.57684850948057	1.42234326818029e-11	1.96867978199616e-10	16.0120722563914
FSCN1	1.72711033544231	0.0520906117971341	8.5766006069157	1.42362201779644e-11	1.96905913385973e-10	16.011178399176
RP11-209A2.1	1.34305574686798	0.100019300484505	8.57585308628164	1.42748494163615e-11	1.97300968766763e-10	16.0084830513585
SUSD3	-1.04012956773441	0.030899027726978	-8.56387615381261	1.49083560685358e-11	2.0567403376739e-10	15.9652919147071
SPIRE1	1.2920126577353	0.110012983452999	8.56380638171907	1.49121282710067e-11	2.0567403376739e-10	15.96504027162
COL4A2	1.4853496931399	-0.0348525550206902	8.56316582912846	1.49468044171278e-11	2.06007327546616e-10	15.9627300096371
EMB	1.89903096255107	-0.370560886539342	8.55874550877448	1.51883191113796e-11	2.09042040915681e-10	15.946786538162
ITK	2.1859109586754	0.235242941402881	8.55134291356993	1.56016035497495e-11	2.1442905187345e-10	15.9200831685914
ALDH18A1	1.20542927249228	-0.00418953159856868	8.5509550900843	1.56235648704773e-11	2.14580411980719e-10	15.9186840614833
SALL3	-2.13487006421176	0.0649609124677098	-8.54496994841719	1.59664567603628e-11	2.18982915357838e-10	15.8970907284191
TRIM50	-1.96655003261008	0.294731904899064	-8.54424122053	1.60087197158494e-11	2.19409019378275e-10	15.8944614261929
DOC2A	2.87969488262313	-0.217740857678851	8.54372828067543	1.6038535402874e-11	2.19664049867874e-10	15.8926106790786
KCTD3	1.13965216548942	0.0233555823396689	8.53177699845728	1.67492666462948e-11	2.28505528334171e-10	15.8494835661391
RP11-140I16.3	-1.18474284548384	-0.145719922827573	-8.52951594206892	1.68872522327649e-11	2.30162208977719e-10	15.84132319146
SAMSN1	1.90635352825326	-0.492784197822744	8.52740535010079	1.70170872238215e-11	2.31609647569221e-10	15.8337055197431
MYH10	-1.32074909017265	-0.165457376708495	-8.52169081030254	1.73736850710321e-11	2.35971485590546e-10	15.8130786344611
GBP1	1.66562385233089	-0.00792685726533082	8.52040964615306	1.74546581663968e-11	2.36907095154578e-10	15.8084538884389
CADPS2	-1.12298507623786	-0.0619158373170633	-8.51991929079499	1.74857503358056e-11	2.37164858706888e-10	15.806683772131
PTGS1	2.9092232810859	-0.030927132318803	8.51880111912587	1.75568592592275e-11	2.37964650499031e-10	15.8026472586068
TGFA	1.99329774190553	-0.269338929660083	8.5123527361502	1.79726505629854e-11	2.43263797226485e-10	15.7793673183918
GPD1	-2.02948706227933	-0.019008073616421	-8.50578202454235	1.84065215550509e-11	2.48792700660306e-10	15.7556426439611
WLS	-1.16815598939255	-0.233567934937658	-8.50184040235552	1.86718311532972e-11	2.51857686698879e-10	15.7414092464579
LIG1	1.61546421255694	-0.254465399635754	8.50061936609332	1.87547966459511e-11	2.52802791928471e-10	15.7369997951249
PMEPA1	1.57022375977388	0.0347897271091622	8.49873950706859	1.88832525432702e-11	2.54359358484916e-10	15.7302109685533
RB1	1.75222424990608	-0.341501992081103	8.49536917730832	1.91157762139006e-11	2.57314627758405e-10	15.7180388953295
CDCA8	3.04746459367822	-0.175626753304121	8.49092061512173	1.94271042983912e-11	2.60967660825339e-10	15.7019714950857
HHEX	1.39044551365702	0.0358148293313257	8.48871166648665	1.9583585296705e-11	2.62889512486384e-10	15.6939926455633
ANK3	-1.81148605960012	-0.303835358390274	-8.48730640559305	1.9683792583071e-11	2.63873222185779e-10	15.6889165805
GPNMB	1.9846454495251	0.100654533370609	8.486841183889	1.97170804312818e-11	2.64004260574931e-10	15.6872360815913
MACROD1	-1.67218832578325	-0.195045307910008	-8.48679332516321	1.9720508060702e-11	2.64004260574931e-10	15.6870632028446
SGOL2	1.28368051100814	0.0277535410295654	8.48427855107078	1.99014612373142e-11	2.66063259747695e-10	15.6779789237973
C10orf85	-1.03885200655114	0.0601229146707993	-8.48235610306489	2.00409185897725e-11	2.67745033020416e-10	15.671034037381
FAM216A	1.46733988468663	0.133257968269044	8.47903016965617	2.028451230307e-11	2.70630467411755e-10	15.6590184059238
GINS3	1.30275845291266	-0.126627801063427	8.47547812159191	2.05479566261105e-11	2.73958776813021e-10	15.646185017905
CDKN1A	1.47146217628525	-0.00490542899541696	8.47157067362667	2.08417369690604e-11	2.77223327578054e-10	15.6320665504017
COL15A1	1.93494366491815	-0.0865036670360889	8.47146963240043	2.0849389502018e-11	2.77223327578054e-10	15.631701451892
CCDC88A	1.17667146523985	-0.252277178038821	8.47126822992165	2.08646515008478e-11	2.77238172722113e-10	15.6309737097037
FAIM3	2.47607248795131	0.0383203308437536	8.46943907503468	2.10037777909545e-11	2.78897724203873e-10	15.6243641600046
NELL1	-2.49296921571217	-0.189993800850592	-8.46077921028726	2.16752237982185e-11	2.87618626419285e-10	15.5930690064195
TRIM59	1.79055026819601	-0.125129491957028	8.45893403680852	2.1821057252713e-11	2.89162204933009e-10	15.5864002059004
HINT2	-1.004681643218	-0.0647587877586643	-8.45581654717437	2.20696940604815e-11	2.92259414791471e-10	15.5751324734162
KIAA1551	1.08229540538839	0.0591640423276079	8.45046606836541	2.25030843258862e-11	2.97395785369551e-10	15.5557923209462
SLC25A48	-1.53343610275408	-0.209474060749614	-8.44823003924494	2.26867299104047e-11	2.99217509767174e-10	15.5477092452272
ADCK1	-1.07767952274488	-0.0605011973136372	-8.44780697987959	2.27216450750815e-11	2.9933223913567e-10	15.5461798783334
RP11-456H18.2	-2.37803329267698	0.249751504549085	-8.44477665674298	2.29733231904585e-11	3.02184000811944e-10	15.5352248421851
ST3GAL1	-1.28029638229959	0.220525196306765	-8.44414919448085	2.30257853168957e-11	3.02670936569979e-10	15.5329563993907
P2RY8	2.05670081427469	0.097921941186074	8.44296845482344	2.31248338920644e-11	3.0376918193738e-10	15.5286876373065
RASL11B	-1.76584669397376	-0.204515626520915	-8.4423755523142	2.31747321360854e-11	3.04046468499412e-10	15.5265440631141
CHST15	2.23872396954674	0.00850057356305551	8.4423489983032	2.3176969434059e-11	3.04046468499412e-10	15.5264480594173
HIGD1B	3.20211418914614	-0.168175674983044	8.44079954426527	2.33078949347091e-11	3.05559486839709e-10	15.520846059197
CD72	2.4882875660544	-0.49506281673388	8.4368563742176	2.3644449297464e-11	3.09743736105683e-10	15.506588903323
ST3GAL5	1.16270127917755	0.100363101077608	8.4366909465796	2.3658675082923e-11	3.09743736105683e-10	15.5059907498606
AAED1	1.00147557894132	0.0296247947847476	8.43563543868454	2.37496453324848e-11	3.10545069816839e-10	15.5021741983137
DMPK	-1.57915299708838	0.0100518434770358	-8.43542971335668	2.37674169460309e-11	3.10545069816839e-10	15.5014303186773
C1R	1.7614079674292	0.149514777159939	8.43132686304462	2.41246487191282e-11	3.15002658391868e-10	15.4865942603683
DHTKD1	-1.46316536524219	-0.0682281554704849	-8.42798755624282	2.4419381948106e-11	3.18426790952049e-10	15.4745183427841
SLC9A9	2.21112689670331	-0.0293708226577827	8.42634440820981	2.4565735800445e-11	3.20122244649549e-10	15.4685759521486
FRK	-1.30182580239739	-0.139890077838828	-8.42417833367811	2.47600150879098e-11	3.22406173955671e-10	15.4607421302129
SCARB1	1.73418262858669	0.257187686892434	8.42249298437179	2.49122454759099e-11	3.23776590903421e-10	15.4546466745539
PECAM1	1.58396680996754	0.186528752901079	8.42020882768873	2.5120067015203e-11	3.26045161212558e-10	15.4463851811743
DACH2	-1.70639606747747	-0.135634999365567	-8.4167924262259	2.54341633169509e-11	3.29903485671027e-10	15.4340278379677
ARHGEF3	-1.03692394731337	0.0762612176031767	-8.41203090512332	2.58785264810394e-11	3.35445264882203e-10	15.4168037743168
PLXND1	1.30337637808095	-0.166097982057288	8.41069563457654	2.60045348868041e-11	3.36855835589209e-10	15.4119733614711
CSF3R	1.52299482424852	-0.264876071838356	8.40993226512658	2.60768504623806e-11	3.37569479664595e-10	15.4092117767275
GNLY	2.95933442123581	-0.312685797183586	8.40820690841641	2.62410430637345e-11	3.39246835756024e-10	15.4029699356297
BTN3A2	2.20505780657787	0.162910843822926	8.40719621084859	2.6337708004424e-11	3.40272075925317e-10	15.3993134299684
TPTEP1	-1.59842891785831	-0.279188710126679	-8.40252283959352	2.67893546428163e-11	3.45879157868615e-10	15.3824051830211
ERGIC1	1.20168896971485	-0.12266464499643	8.39712205542436	2.73210109692559e-11	3.52279272359504e-10	15.3628633064463
EMILIN2	1.37510632722112	-0.121326882760002	8.39571825041562	2.74609313401194e-11	3.538506202071e-10	15.3577835375455
SLC25A35	-1.68495760178923	-0.175064697215178	-8.39525978313712	2.75067837122098e-11	3.54208576856504e-10	15.356124511945
TTC38	-1.32635286271698	-0.0286187827476497	-8.39213048895822	2.78218145244857e-11	3.5756048712485e-10	15.3448003593143
GAS2L3	2.65256461023752	-0.0848415590859461	8.39097184074953	2.79393755873344e-11	3.58836056445718e-10	15.3406073259014
HEATR2	1.15601153341317	0.0358996679962666	8.38873001430524	2.81682604126488e-11	3.61065883471225e-10	15.3324941199401
SMCO3	-2.14388055404131	-0.301271054396325	-8.38506043319062	2.85469917851975e-11	3.65681367319011e-10	15.3192131151794
GAL3ST4	1.61608954356048	-0.0323970163532432	8.38483183731876	2.85707535049415e-11	3.65695419340305e-10	15.3183857474438
SLC38A1	1.17988382672349	-0.128196899155865	8.38469096555401	2.85854065222382e-11	3.65695419340305e-10	15.3178758819222
ALDH1L1	-1.3260072137718	-0.0505413886233958	-8.38407608726338	2.86494526648736e-11	3.66275683482621e-10	15.3156504008697
WDFY3-AS2	-1.24360422721509	-0.141563422603038	-8.38287334329208	2.87751487694677e-11	3.67642855758017e-10	15.3112971342554
FCGR2B	2.87071291292842	-0.111129265332691	8.37047845101997	3.01032643099802e-11	3.83611103518402e-10	15.2664288412205
STRADB	-1.02073360601399	0.109795279779341	-8.36859172087436	3.0310764603597e-11	3.86004337534696e-10	15.2595981626467
SLC7A7	-2.06051677978333	-0.145714273886863	-8.36671942030327	3.05180996620891e-11	3.88140321399925e-10	15.2528194901568
SLC5A12	-3.03705368850967	-0.370927652639828	-8.36435930707382	3.07814871910635e-11	3.90910023827791e-10	15.2442743574702
PLAUR	1.94732769344222	-0.0252835042830998	8.3638061231607	3.08435521847829e-11	3.91263934802305e-10	15.2422714212194
HES4	2.80644572367136	-0.320213191409952	8.36141230635513	3.11135823904306e-11	3.94434088790459e-10	15.2336037938902
TP53	1.17281623322591	-0.157038768190277	8.36068552177149	3.11960354726451e-11	3.95223722836697e-10	15.2309721480647
DUSP10	1.41075720045918	-0.0582924785547909	8.35745625737639	3.15650577102391e-11	3.99382547490624e-10	15.2192787413727
TMEM123	1.11747787211227	-0.146665979163937	8.35370183572803	3.19996136012162e-11	4.04619630303378e-10	15.2056828341298
RNF125	1.5219630599074	-0.289558443324478	8.35174388047006	3.22286186426431e-11	4.07252544666127e-10	15.1985921111135
KLK6	-2.4968788256842	0.281853445357394	-8.350875005255	3.23307706174932e-11	4.08280137456346e-10	15.1954454038765
SH2D1A	2.23730881161327	-0.0646522444663735	8.34928641471042	3.25183805918391e-11	4.1038489453925e-10	15.189692056375
ZNF667-AS1	-1.84802452354536	-0.506775304384451	-8.34722270191435	3.27637373325675e-11	4.1294950995562e-10	15.1822177259048
SLC39A5	-3.04584627276169	-0.175373092462425	-8.33375261568289	3.44115809673247e-11	4.33161576993318e-10	15.1334250709314
MFSD3	-1.4613243741403	-0.133378626323186	-8.32831227075604	3.5100512745441e-11	4.41266805194289e-10	15.1137151692716
ASPH	1.01275350365262	-0.214423942701673	8.32693509772912	3.52770981071791e-11	4.43202465258079e-10	15.1087254849993
AUH	-1.25099498596745	-0.225253632380163	-8.32279319483353	3.58135865072819e-11	4.49654376653567e-10	15.0937180697636
AFAP1L1	1.25203652496932	0.0384043538466588	8.32252270088076	3.5848906783248e-11	4.49809682487118e-10	15.0927379465959
ETNPPL	-3.19783088309794	0.060708138582171	-8.31377890613199	3.70097052046587e-11	4.64077551059568e-10	15.0610526413831
TRAC	2.53903210126679	0.100159633684958	8.31321405928084	3.70859790102263e-11	4.64736638504747e-10	15.0590056097442
PCDHB14	1.80461197788189	-0.0200825270142518	8.31238625426445	3.71980468392891e-11	4.6584314377203e-10	15.0560055682905
CLSTN2	-2.96218790240342	-0.500270573337587	-8.30766260208431	3.78440779484744e-11	4.73328706899904e-10	15.0388857778587
DNAJC28	-1.17879346927245	-0.0987823073180825	-8.30544951949906	3.81506190981488e-11	4.76554482922001e-10	15.0308644778838
ACOT12	-2.42595904129391	-0.397295084758324	-8.30481315876163	3.82392246569225e-11	4.77357047166258e-10	15.0285579355875
QRFPR	3.79186155143467	0.0820492397799849	8.3044651394269	3.82877696291308e-11	4.77564940838861e-10	15.0272964996928
KCNE4	2.62179329696745	-0.113062301572626	8.29418132423004	3.97505598785621e-11	4.95277319173515e-10	14.9900181531031
PLA2G7	2.9996768674141	0.128732164025878	8.29020823342806	4.03306313505087e-11	5.02185542464181e-10	14.9756140879788
CHL1	-2.64738078932039	-0.268678205956806	-8.28700103498398	4.08050839679968e-11	5.07770692500806e-10	14.9639859652879
MRO	-2.16189005638325	0.360834249069574	-8.28497026277041	4.11084006027105e-11	5.11220522469875e-10	14.9566227961881
NTNG1	-2.08307323463272	-0.380248174702516	-8.28245898895722	4.14866213060279e-11	5.15596887112772e-10	14.9475170664138
GNA15	1.68394751019947	-0.157357094200538	8.27917233649742	4.19869111882688e-11	5.21483822800304e-10	14.935599260864
ZNF267	1.06287327404433	-0.0824748030695266	8.27771383211842	4.22108612744131e-11	5.23933293297797e-10	14.9303103277089
ESYT2	1.28174037994119	-0.090647219415508	8.27374893903769	4.28257493987575e-11	5.30970341664801e-10	14.9159318749461
SLC41A2	1.35002884351759	-0.0770615641996892	8.27061092571948	4.33187792228164e-11	5.36665457640947e-10	14.9045513568931
HCP5	1.72155906368759	-0.0902587506852328	8.27001786336801	4.34125974435066e-11	5.37487995764553e-10	14.9024004503631
COBLL1	-1.47837913217289	-0.21368400722059	-8.26215924380745	4.46752323945468e-11	5.5172645223738e-10	14.8738969025173
RP11-247L20.4	-1.29565464628669	-0.133874789834488	-8.26098616951448	4.48668495254578e-11	5.53743944489577e-10	14.8696417833744
SCN7A	-1.94179456587483	0.0190731364588937	-8.26049876556297	4.4946707794736e-11	5.54380444348037e-10	14.8678737868498
UBE2T	1.65108494100718	0.0878095343745464	8.26000348716601	4.50280026001233e-11	5.55033850918124e-10	14.8660772117068
KIF14	2.49537178470568	-0.323414231361587	8.25875035375238	4.52343520947437e-11	5.57226943246312e-10	14.8615315220283
CD69	2.12631093424963	-0.0447533286017688	8.25292393289205	4.62063244931764e-11	5.68842810139299e-10	14.8403951479607
CYP8B1	-2.80847522855955	-0.740601513819688	-8.24910465948957	4.68548249749143e-11	5.75741513908053e-10	14.8265389229066
CD93	1.51222236630624	0.177159937673171	8.24539002957393	4.7494332421973e-11	5.83233973144267e-10	14.8130614830429
STAT1	1.20804884682892	0.0340629239016859	8.23926575048222	4.85678964720909e-11	5.95670965554761e-10	14.7908394987246
VMP1	2.20489815737866	-0.225412549022928	8.23550279095147	4.92395929207993e-11	6.03531445687771e-10	14.7771844430608
CYP39A1	-1.65334787887162	-0.375059735455004	-8.23071859653137	5.01070812642187e-11	6.13780428560889e-10	14.7598222809331
ESRP1	-2.54271173974663	-0.814405960659933	-8.22903290782543	5.04163826760947e-11	6.17183437894304e-10	14.7537044733457
THEMIS	3.04324468536004	-0.358632642057462	8.22846296028442	5.05213939518674e-11	6.18082896418633e-10	14.751635944976
JAZF1	1.65622978912606	-0.255310026730543	8.22710891712945	5.07717550555631e-11	6.20758345186513e-10	14.7467215952705
FGD6	1.24459881167444	0.0586202745224861	8.22399070820081	5.13530610850828e-11	6.27083267418403e-10	14.7354039805233
PSAT1	-2.556495285181	-0.209074707513989	-8.2213381121421	5.18528288435125e-11	6.32398004047294e-10	14.7257758579879
SH3GL1	1.16365086091926	-0.0606630334669337	8.21810008136976	5.24695271645812e-11	6.39521307772778e-10	14.7140222111883
SH3RF3	1.48614854328097	0.117939668509909	8.21718882160036	5.26444063166011e-11	6.41254020757653e-10	14.7107143387709
TMEM71	2.92660493206713	-0.678577468278917	8.21138064809716	5.37728974471359e-11	6.54186851065436e-10	14.6896295048703
INHBB	2.99231993016445	0.204138513264811	8.20635352724802	5.47692452595513e-11	6.65069664090425e-10	14.6713784240057
MCTP1	1.81864267603719	-0.299478220609211	8.20351340111485	5.53403230542560e-11	6.71172643279928e-10	14.6610666149778
SLC19A2	-1.04083168045773	-0.149217392525395	-8.19679153835004	5.67158775180071e-11	6.87005243186293e-10	14.6366592588062
PKHD1	-1.60318339738294	-0.338361257538073	-8.19611477442039	5.68562596633521e-11	6.88280316949992e-10	14.634201753687
RAB8B	1.06023080625807	-0.0751718098262787	8.19582874859142	5.69156953520395e-11	6.88574514323841e-10	14.633163111702
ZNF582-AS1	-1.74168833873617	-0.321002017116369	-8.19455979329126	5.71801360381506e-11	6.91346999513704e-10	14.62855511221
CSPG4	2.77033457031483	-0.468320465718843	8.19209604067091	5.76970945310829e-11	6.97167296988097e-10	14.6196081349835
SIGIRR	-1.22782089771001	-0.108533146974194	-8.19113942222582	5.78990811911351e-11	6.99176889873726e-10	14.616134133471
SLCO2B1	1.48098099970942	-0.0989437209645322	8.17677625557412	6.10186730627288e-11	7.35488913503334e-10	14.5639672331316
FKBP11	1.21646429351313	0.229237933448404	8.17607578717335	6.11750584578902e-11	7.36920694969999e-10	14.5614228305071
GZMB	1.96505773987518	0.189988192546072	8.1752454539221	6.13609590303444e-11	7.38706041790983e-10	14.5584066660085
HMHA1	1.62381352767291	-0.206534258267774	8.17407514859233	6.16239391404873e-11	7.41416564281405e-10	14.5541554937007
GPR155	-1.72574097751074	-0.0773427235344784	-8.17159233228977	6.21856107145476e-11	7.4771520514995e-10	14.545136319935
SHISA2	-2.80647198694242	-0.462705927888679	-8.16886396287167	6.2808766774326e-11	7.54282487751235e-10	14.535224729702
ANXA4	1.5602680234349	-0.09378105498668	8.16819081184918	6.29634762647179e-11	7.55677385984204e-10	14.5327792480646
REEP2	-1.98634528522944	0.148333435505877	-8.15751854037922	6.54680676465062e-11	7.83817139770236e-10	14.4940046117398
CLEC5A	2.80187455006983	-0.322948133932964	8.15648214676133	6.57165613148135e-11	7.86311895732009e-10	14.4902388253611
PALM3	-2.39807332670883	-0.543392792092133	-8.1560105718983	6.58299432251766e-11	7.87187954405269e-10	14.4885253149714
GJC1	2.39356470170588	-0.244857455283765	8.15495143619201	6.6085310851098e-11	7.89759760591871e-10	14.4846768022841
NR3C2	-1.94747099790926	-0.458655267960077	-8.15437333178108	6.62251169726429e-11	7.90948243477653e-10	14.482576154819
BIRC5	2.58251840694562	-0.456786756656805	8.15415335280249	6.62783937044161e-11	7.91102459325732e-10	14.4817768162104
AC112198.1	-1.4025560138486	0.118368644306415	-8.15022114112763	6.7238035045238e-11	8.0206831944712e-10	14.467487856297
TMC8	1.67628091630858	-0.406150011373509	8.14613616635595	6.82497466199825e-11	8.13641596110119e-10	14.4526428526343
MED10	1.0203810865003	0.00474846828185169	8.14580378265952	6.83327367966914e-11	8.14135749834866e-10	14.4514349119876
EPRS	1.02312750489361	-0.0994778840323672	8.14131473172482	6.9463554440494e-11	8.26718318376882e-10	14.435120302106
AMN	-1.47638210082652	-0.141576701887856	-8.14127679346383	6.9473190997843e-11	8.26718318376882e-10	14.4349824177984
TUBB2B	-2.57735800064385	-0.194866081227133	-8.14105834097248	6.95287054479148e-11	8.2687687989908e-10	14.4341884638953
ETS1	1.88524906768609	0.0686818504964382	8.14056213349839	6.96549703129548e-11	8.27876145035537e-10	14.4323850143641
PALD1	1.83833441379134	-0.146095981889371	8.14008454699453	6.97767144677652e-11	8.28820501123473e-10	14.4306492290319
BDH2	-1.55736722525748	-0.307013776832861	-8.13941518479132	6.99477050996825e-11	8.30348317534026e-10	14.4282164144414
C11orf73	1.04162323962013	0.00523528062708166	8.13782761243041	7.03549406765522e-11	8.34172100616906e-10	14.4224462400257
SNAPC1	1.52268154758969	0.0631636501919555	8.13697736776777	7.05740195682821e-11	8.3626373005971e-10	14.4193558911434
PTPRD	-1.93847902775109	-0.270873474690374	-8.13511186026963	7.10571016727809e-11	8.40971096428039e-10	14.4125752664991
DOCK2	2.11454564335904	-0.244782150525089	8.13282673597774	7.16533754340923e-11	8.47516297605778e-10	14.4042691803444
KCNK5	-1.83682677272585	0.160583991023307	-8.13214591957989	7.183199584512e-11	8.4911657814747e-10	14.4017944577112
RP11-503C24.6	-2.19826497431614	-0.0101442497491106	-8.12997079369769	7.24056698562906e-11	8.55381991267896e-10	14.3938878451984
C4orf47	2.16957219195478	-0.124943058847485	8.12930975985104	7.25809232112283e-11	8.56935851817387e-10	14.3914849257252
CRNDE	2.11592490833685	-0.14422902415293	8.12793300673824	7.29472975153813e-11	8.60742976522552e-10	14.3864802219601
VASH1	1.406673510304	-0.215018075799837	8.1270379575937	7.31864793748082e-11	8.63045613277296e-10	14.3832265276099
PPP1R1A	-3.00265766199078	-0.397658056625533	-8.1236314431919	7.41040226506805e-11	8.72291135093506e-10	14.3708427143063
SEMA5A	-1.27697559468309	-0.130817854311821	-8.12284878158985	7.43164597693993e-11	8.74266683685748e-10	14.3679973878945
PLEKHG4	1.47410953990587	0.0594849516235634	8.11560003619089	7.6313288755775e-11	8.96143886353765e-10	14.3416433312289
CDH16	-2.35417897926736	-0.568431622152502	-8.11137726988255	7.75013018430869e-11	9.09549709474647e-10	14.3262894039806
EPB41L4B	-1.29227950410167	-0.144104026478329	-8.10186892382417	8.02448072095325e-11	9.3949699910372e-10	14.2917135929184
IL7	1.50045499173934	-0.0613348651843821	8.10167953543204	8.03004325174873e-11	9.39586971289692e-10	14.291024857561
LAMC1	1.12338448076866	-0.0117039744995718	8.10004390280004	8.07824493604027e-11	9.44663022085043e-10	14.2850765869303
MAZ	1.1377320889834	-0.172470587966387	8.09936637532954	8.09829654367546e-11	9.45552892384355e-10	14.2826125944753
DLGAP5	2.68960902726547	-0.373599827045284	8.09899261306968	8.1093795304937e-11	9.46046008441345e-10	14.2812533069743
TTC13	1.19905500257211	0.0377401176040326	8.09720606804045	8.16256591895302e-11	9.51684291764189e-10	14.2747559482168
LRRK1	1.64888859357143	-0.300867652097502	8.09557653293878	8.21138358151529e-11	9.56806818157658e-10	14.2688294567553
TMX1	1.37179037809351	-0.189336204647075	8.0943985531279	8.24685609155346e-11	9.60369177292669e-10	14.2645451469345
SELPLG	1.61224858115381	-0.235328617126422	8.0929074739494	8.29197780908573e-11	9.64847095683026e-10	14.2591219878047
SETD7	1.50679036416318	-0.318463679855185	8.09280280094285	8.29515463149089e-11	9.64847095683026e-10	14.2587412802541
ACSM2A	-2.16891827087709	-0.151890422508848	-8.09185136222678	8.32408689173846e-11	9.66491581701316e-10	14.2552807630183
SPAG5-AS1	-1.44636879855054	-0.0131061869267218	-8.08662797754893	8.48474012084646e-11	9.82642884252696e-10	14.2362817045373
MFAP3	1.71077691343871	-0.388292927518734	8.08651459625985	8.4882616615124e-11	9.82642884252696e-10	14.2358692855982
PLAC8	2.32321031650076	0.00924071451713556	8.08125586660035	8.65321757235964e-11	1.00055699823408e-09	14.2167401540127
MME	-2.20544746372217	0.10743025799521	-8.0810750894471	8.65894509342508e-11	1.00062892031862e-09	14.2160825335213
RTP4	1.87238412201981	0.202264972034509	8.07999795998227	8.69315057179794e-11	1.00398973516009e-09	14.2121641791319
CSGALNACT2	1.24999565866333	-0.0531274963469305	8.07780341928786	8.76326130250233e-11	1.01089557544287e-09	14.2041807427464
APBB1IP	1.89565062005035	-0.291913588472158	8.07631973509549	8.8109832929656e-11	1.01580271505196e-09	14.198783158841
SOD3	-1.11780749966605	-0.14162364353708	-8.07467195360717	8.86428942747505e-11	1.0213474925872e-09	14.1927884582318
STK33	-2.47333139625198	-0.655944747392698	-8.07070928106048	8.99381300323964e-11	1.03505426336168e-09	14.1783714931996
APOL1	2.24238185302011	0.318135616167353	8.06774563793399	9.09192354003593e-11	1.04573127618054e-09	14.1675886458687
EPDR1	1.13175983498893	0.0738547046488809	8.06748067402631	9.10074727634593e-11	1.04613223383639e-09	14.1666245850077
ELTD1	2.0885782131597	0.0431810461520317	8.06653613363874	9.13227208038524e-11	1.04914068290428e-09	14.1631878814433
CDK18	1.40651326424059	0.0329326786552226	8.06523275203855	9.17595370322873e-11	1.0529245704308e-09	14.1584454594039
MDH1B	-1.31207996314316	-0.252370015322551	-8.05079667620561	9.67403113543841e-11	1.10683792307914e-09	14.1059130842529
CASC10	-1.27504966618707	-0.146993286478787	-8.0493579391324	9.72513545501305e-11	1.11203576302684e-09	14.1006769745824
GABRB2	-1.64160963814631	-0.0295854891562764	-8.04890143334356	9.74140726321696e-11	1.11324688601626e-09	14.0990155544926
CHDH	-1.55367427492112	-0.123265928786758	-8.04705372120759	9.8075474056283e-11	1.12015222379318e-09	14.0922908282924
SLC15A4	1.52672814379797	-0.017593787517237	8.04461793432862	9.89542785046903e-11	1.12953110332756e-09	14.0834255410847
OXGR1	-2.60664090756199	-0.170966145172936	-8.03593131570085	1.0215321389956e-10	1.16333575782538e-09	14.0518072436314
GGH	-1.60532856760791	-0.151867887250457	-8.02704953015236	1.05531457051514e-10	1.20041266787732e-09	14.0194745654825
RAB33A	1.79488028072755	0.0304474241350263	8.02603253030347	1.05925370682171e-10	1.20419451276094e-09	14.0157720887427
ZCCHC8	1.03623744774456	-0.154974206725433	8.01902161700731	1.08681380784406e-10	1.23338964569125e-09	13.990246822334
NFASC	-1.52046962634454	0.0349853511932779	-8.01821633156483	1.09002517189532e-10	1.23559302162963e-09	13.9873147879236
EOMES	2.17105303991148	0.187611123218395	8.0168339190753	1.09556027546579e-10	1.24114947045399e-09	13.9822813649355
RP11-532F12.5	-1.30194088340612	-0.159650209428659	-8.01476772564568	1.10388587170614e-10	1.24913736718064e-09	13.9747580872996
UCP2	1.11008045450923	0.0625942530353953	8.01097334322459	1.11934094680122e-10	1.26589516539856e-09	13.9609416926369
HIST1H2BK	1.94269331337127	0.0818453047394851	8.00945844338973	1.1255718891404e-10	1.2714745507356e-09	13.955425322753
FOLR1	-2.12762080368329	-0.294314812189269	-8.00414580960358	1.14769989678427e-10	1.29486391700131e-09	13.9360789467888
BICD1	1.49633673615514	-0.128274166615302	8.00401283112493	1.14825934371564e-10	1.29486391700131e-09	13.9355946771497
TRAM1	1.31218658292829	-0.277857914450667	8.00349449595109	1.15044262055024e-10	1.29657992640391e-09	13.9337070401163
ARHGAP22	1.65295683989355	0.0188603109750826	8.00277724777987	1.15347061529424e-10	1.29924543615815e-09	13.9310949935773
STRBP	-1.03332354906045	-0.0538134705211989	-7.9976572048746	1.17531958007923e-10	1.32233573191577e-09	13.9124482808866
THOC6	1.53445771706895	-0.291178324748015	7.9961767291692	1.18171439680621e-10	1.3280057604934e-09	13.9070562870939
THRB	-1.28629587630688	-0.212442511027147	-7.99369502726147	1.19251242052673e-10	1.33937254612627e-09	13.8980175171342
TIPIN	1.03554279924803	-0.0222986963096999	7.9918355650511	1.20066793242565e-10	1.3477600691644e-09	13.8912448492132
SUCLG1	-1.18933753491033	-0.0232568466089199	-7.98859681737232	1.21500689736745e-10	1.36218145624053e-09	13.8794480436347
GK3P	-1.65554761439549	0.0310561829549991	-7.98846357493552	1.2156004729653e-10	1.36218145624053e-09	13.8789627107723
COL23A1	3.89892728954139	0.263282212718505	7.98731563186572	1.22072646889221e-10	1.36714388936105e-09	13.8747813156358
JAG2	1.23507769682774	-0.0214923669813093	7.98578957782042	1.22757449727823e-10	1.37402813090554e-09	13.8692225476863
SEMA4B	1.31002594007088	-0.0382197338071917	7.98541772408714	1.2292489942791e-10	1.375117068429e-09	13.8678680249912
SORCS1	-2.15156009096211	0.0940165355281327	-7.9814320538836	1.24734158665435e-10	1.39456062503357e-09	13.8533493118795
STK39	1.59487116753305	0.232656576099515	7.98081428074665	1.25016975112844e-10	1.39692570994106e-09	13.8510988632912
SERPINE1	2.63584229159462	0.135091287663992	7.97303653051051	1.28633205689238e-10	1.43569601270124e-09	13.8227641879699
FGR	1.57315709384899	-0.132873068876903	7.97281560400497	1.28737444587947e-10	1.43604164853681e-09	13.8219593007558
PNMA2	2.545127868811	-0.0317279814804278	7.9722915533417	1.28985044751768e-10	1.43798514908413e-09	13.8200500515794
PTPN12	1.80218259826712	-0.0275927404252552	7.97121914716533	1.29493220041881e-10	1.44282980079637e-09	13.8161429634396
BHMT2	-1.36753542688081	-0.201325780237391	-7.96922417069126	1.30443923605156e-10	1.45197896399177e-09	13.8088745363168
COL4A4	-1.62163397472186	-0.223628556806441	-7.96918529058995	1.30462521332186e-10	1.45197896399177e-09	13.8087328800308
CFD	2.41156006496308	-0.164447405641234	7.96878988580122	1.30651808715524e-10	1.45326038536638e-09	13.8072922527792
COL6A3	2.53779909628299	0.207213341492909	7.96825423871767	1.30908672529281e-10	1.45529158984764e-09	13.805340651481
OLFM4	-4.13011758058981	-0.570572436693915	-7.96201108130838	1.33940175433044e-10	1.48730509819389e-09	13.7825930348032
RENBP	-2.09284572128592	0.00683089528727148	-7.9575715984487	1.36138658343248e-10	1.51000654491755e-09	13.7664161746557
PRB1	-1.10875624707958	-0.0240126287994858	-7.9537629627268	1.38053594736368e-10	1.52951520816172e-09	13.7525372920914
ZBED8	1.12723933671338	0.0541802550265522	7.95205186387429	1.38922697469782e-10	1.53827454672896e-09	13.7463017294769
DBF4	1.32327064860887	0.06695665095855	7.95002164186864	1.39961018691753e-10	1.5488966715639e-09	13.7389030444648
ANXA2R	1.82247264237683	0.0866791162480784	7.94939452880035	1.40283317137486e-10	1.55158732086772e-09	13.7366176336515
ANXA2	1.27073004336363	-0.0324109391657714	7.94881586686741	1.40581375651138e-10	1.55340201257482e-09	13.7345087787337
OIP5	2.74632560176869	-0.152305058034247	7.94786151508378	1.41074335136684e-10	1.55769909540499e-09	13.7310307389096
ASPM	2.41201553921773	-0.45379588629186	7.94252154306271	1.43864836966086e-10	1.58583067474596e-09	13.7115689599453
SDSL	-1.17593976478629	-0.166370500011371	-7.92840957199847	1.5150901112091e-10	1.66634405665472e-09	13.6601308648559
FBLN5	-1.80890980431694	-0.349946463954048	-7.92663080015234	1.52501042617476e-10	1.67631404052716e-09	13.6536465974667
PPP1R14B	1.57029675404457	0.0466540938615338	7.92529667730211	1.53249368468971e-10	1.68359550034942e-09	13.648783141928
NLRC4	2.10217300727605	-0.467187268378092	7.92344487961929	1.54294178612015e-10	1.6941241493652e-09	13.6420324031321
SH3BP5-AS1	-1.4544567255621	0.0126500606184681	-7.921533343561	1.55380196186239e-10	1.70413904032126e-09	13.6350637243056
AMICA1	2.37553893664829	-0.400590846441219	7.92082254222095	1.55785984544046e-10	1.70667943604178e-09	13.6324723909941
PHF21B	-2.12708864809336	-0.480800830075373	-7.91903112653114	1.56813409436327e-10	1.71697542544278e-09	13.6259414138636
BST2	1.78718141724184	0.394520866910918	7.91427269846426	1.59575652014877e-10	1.74429626538738e-09	13.6085928745373
PIGR	-2.46887611411055	-0.658085843163093	-7.91400634322242	1.59731705653204e-10	1.74502881777991e-09	13.6076217517762
TACSTD2	-1.23745573050922	-0.241037664408036	-7.912548966018	1.60588278229882e-10	1.752186831436e-09	13.6023081442991
PCDH17	2.12809280583999	0.175081469536073	7.90887978871175	1.62765311973822e-10	1.77421432112066e-09	13.5889298765623
FOXC1	-1.58016383456924	0.041153485645785	-7.9081805688546	1.63183529302076e-10	1.77778431950605e-09	13.5863803674194
AGAP2-AS1	3.14882288844568	0.411966560672901	7.90724397408279	1.63745416160818e-10	1.78291467296438e-09	13.5829653030211
TRIM63	-2.92910225694311	-0.223028536618963	-7.90641600690086	1.64243751886611e-10	1.78734774748789e-09	13.5799462900624
BUB1B	2.47902665304863	-0.371330038978526	7.90454218299311	1.65377195874194e-10	1.79768589125809e-09	13.5731136617873
ANO5	-2.53505576904194	-0.643376606432071	-7.90369903048398	1.65889762832556e-10	1.80225801649404e-09	13.5700391769974
HSPA6	1.94735865606082	-0.0537087481588924	7.90230979696373	1.66737783030334e-10	1.81046748454932e-09	13.5649733848449
MYO6	-1.13864948817629	-0.057661942932304	-7.89541541375583	1.7101110539869e-10	1.85378686654255e-09	13.5398319911528
CUBN	-2.05767607493458	-0.101631783660999	-7.89375820600744	1.7205457292569e-10	1.8630373341274e-09	13.5337884244966
FAM64A	2.01003161794402	-0.353597682108223	7.89115998017598	1.73703437851353e-10	1.87985294226873e-09	13.5243128757736
CPAMD8	-1.59832700611949	-0.195768962640232	-7.88796330773697	1.75753865255265e-10	1.89994484563592e-09	13.5126544289848
C9orf84	-2.03642650728011	-0.299147223889892	-7.87809783088023	1.82236312501087e-10	1.96676733959735e-09	13.4766716729205
ANGPTL1	-2.54778064419555	-0.342096788561332	-7.87324384480956	1.85513351235133e-10	1.99993188716027e-09	13.4589659911004
MYLK3	-1.20949986087507	0.118600757821854	-7.86764078246405	1.89369732770857e-10	2.04038339338979e-09	13.4385266824962
PPM1E	-1.85630934033463	-0.132721242864117	-7.86646119990906	1.90191794411438e-10	2.04548126678124e-09	13.4342235346697
CD163L1	2.72756170183059	-0.603493718395038	7.86582094243884	1.90639494422917e-10	2.04843390964625e-09	13.4318878340633
FGFR3	-1.40068222598972	-0.143015079807961	-7.8655413343533	1.9083534208276e-10	2.04941472300275e-09	13.4308678002572
AZGP1P1	-2.48903486826659	-0.353951482462927	-7.86473996402146	1.91397770577525e-10	2.05254469748182e-09	13.4279443155644
ABCC1	1.31208768476767	0.0715783202999027	7.86467849969426	1.91440976937434e-10	2.05254469748182e-09	13.4277200860016
PNRC1	1.01313106543163	0.05513893214758	7.86108063671004	1.93987229443588e-10	2.07757142615568e-09	13.4145943531813
TAGLN3	-1.71063210653057	-0.172501936956914	-7.86053600806684	1.94375621317734e-10	2.08059410278879e-09	13.4126073900209
CSRNP3	-1.22893888111088	-0.157555696983305	-7.856884369576	1.96999958846147e-10	2.10753394837643e-09	13.3992848323074
DOK2	1.95927250554734	-0.376635862963159	7.85584344858673	1.97754534972337e-10	2.11329941707897e-09	13.3954870566038
CRYL1	-1.55512340881874	-0.145328154074825	-7.85442561488437	1.98787008893942e-10	2.12317525194135e-09	13.3903140508462
RP11-38P22.2	2.91594587848716	-0.272982886397123	7.85093355544098	2.01353078632336e-10	2.14941121357034e-09	13.3775728170699
HRH1	1.78353705730968	-0.341270058417811	7.84879552438905	2.02940550854824e-10	2.16399992176479e-09	13.3697716819579
AC010524.4	-1.22052047454846	-0.0219407582339997	-7.84753509161649	2.03882292519671e-10	2.1728597341452e-09	13.3651725924277
FKBP4	-1.05103310970054	0.0844003341425586	-7.84638845468164	2.04742820532994e-10	2.18084485849247e-09	13.3609886660686
GIT2	1.2485771089432	-0.101522520156229	7.84378416399549	2.06710855727198e-10	2.20061165746733e-09	13.3514857524956
TAF1A	1.26265542230206	-0.106625860321569	7.84091431368385	2.0890156965032e-10	2.22272631030218e-09	13.3410135030584
PBX1	-1.65863907071376	-0.609924545248165	-7.83778276588844	2.11318648295585e-10	2.24600552491604e-09	13.3295859190049
DHDH	-2.8608962022877	-0.44400865998672	-7.83572324783256	2.12923564005269e-10	2.26183681893727e-09	13.3220701468294
COL4A3	-1.41628192014182	-0.287675254267634	-7.83217974902153	2.15713583105251e-10	2.29023321521116e-09	13.3091384990834
FOXM1	3.06407224663332	-0.36327146086773	7.82927831210347	2.18025368220648e-10	2.31227228991152e-09	13.2985496134384
DPYS	-2.78798007123886	-0.221073446611481	-7.82850893356914	2.18642548104512e-10	2.31748695179481e-09	13.2957416851067
C1orf54	1.01239419958257	-0.0523881032069406	7.82822370628348	2.18871796916792e-10	2.31748695179481e-09	13.2947007118934
FNDC5	-1.10397531271449	0.0120173592078122	-7.82378326043749	2.22472037200932e-10	2.35433555998978e-09	13.2784943184097
PXDN	1.5771002416427	-0.02783077580339	7.8209176125368	2.24826952846477e-10	2.37797271928661e-09	13.2680350799832
ISG15	1.85830695094702	-0.0673013608520219	7.81858775364757	2.26759997815378e-10	2.39454159331013e-09	13.2595311593952
RBCK1	1.20643779629825	0.184369159138138	7.8155489376487	2.29306341143684e-10	2.41882399358184e-09	13.2484392404531
SPI1	2.6745025586873	0.202287741008324	7.81404643963939	2.30575925449924e-10	2.43090777993171e-09	13.2429548685027
FMO1	-2.3212424541831	-0.476490388269583	-7.81277241497065	2.31657979295472e-10	2.43972232739882e-09	13.2383043929584
PBLD	-2.07961827895128	-0.34442785830489	-7.81276890793544	2.31660964910924e-10	2.43972232739882e-09	13.2382915914055
CCR2	1.99910006260299	-0.241144770080347	7.80890391851888	2.34974898914658e-10	2.47196620710058e-09	13.2241831218569
C18orf54	1.31351646070543	-0.184284122838967	7.80744100091627	2.36241614873808e-10	2.4826270294433e-09	13.218842843218
ARL11	1.99511807632138	-0.200578573358399	7.80663492325984	2.36942510106703e-10	2.48865822914324e-09	13.2159002771371
HSD3B7	1.5256958438104	0.00626533012465426	7.80448856341636	2.38818991829229e-10	2.50434104914984e-09	13.2080649209497
HLX	2.46302876511432	-0.187994775407654	7.80411289212438	2.39148957401213e-10	2.50646011556491e-09	13.2066935022236
DOK1	1.19622537841565	-0.238992598469239	7.80270786733425	2.40387101664884e-10	2.51809022208982e-09	13.2015642957498
SLC25A34	-2.23163399734757	0.0739447185014197	-7.80098453962637	2.41914530410301e-10	2.53234124955004e-09	13.1952729825616
ADAM10	1.22100493765737	-0.188005844707407	7.79596222400636	2.46421716300765e-10	2.57168222458929e-09	13.1769374728811
MT1F	-2.17171607851683	-0.542496166415716	-7.79260293825881	2.49483386503773e-10	2.60224847902472e-09	13.1646728228691
COL5A2	1.94874236190225	0.292446869350601	7.78880278052999	2.52992913461579e-10	2.63745112283696e-09	13.1507980410835
GPSM2	1.29130762284857	-0.27312784693605	7.78597217554184	2.55639195040935e-10	2.66220647375519e-09	13.1404628418388
RUNX3	1.48177719642722	-0.126414350097942	7.77167372788845	2.69437181621778e-10	2.80291896104311e-09	13.088251248607
BSPRY	-1.82656192695125	-0.618905435363248	-7.7684116468825	2.72688368997887e-10	2.83487979594268e-09	13.0763385038994
CPOX	1.35147493774655	-0.14956948133864	7.76786613515155	2.73235888156736e-10	2.83791742023523e-09	13.0743463193176
PLXNB1	-1.62117055312476	-0.111140158008391	-7.76620229146604	2.74912677277597e-10	2.85382074256547e-09	13.0682699682726
UBAC2	1.01657711418738	0.0611353028978131	7.76595587077691	2.75161891544285e-10	2.85489566563073e-09	13.0673700321347
DNER	-2.60371700961267	-0.716926143656844	-7.76321491422607	2.77949252381495e-10	2.88076541376252e-09	13.057359821565
HOXA7	-1.18544775976879	-0.174832826624087	-7.76226127663464	2.7892566392452e-10	2.88935733998767e-09	13.0538769898266
DDX60	1.26714103939196	-0.0875395501887269	7.76037877039935	2.80863240984362e-10	2.90767085496597e-09	13.0470016885909
AQP11	-1.69388110930602	-0.149377772032321	-7.76025579271684	2.80990285183201e-10	2.90767085496597e-09	13.0465525442074
CDH9	-2.37949416296177	-0.421217425378441	-7.75943823353106	2.81836345810621e-10	2.91488682930996e-09	13.0435666053309
RP11-672L10.6	-1.24242034077598	-0.0760453651114972	-7.75141833533937	2.90272564838713e-10	2.99423789382839e-09	13.0142745621862
VEGFA	2.17726174476514	0.375727716774001	7.75050459401706	2.91249678098512e-10	3.00273668650854e-09	13.0109370467446
SIM1	-2.2841460410624	-0.494343975605673	-7.749583337947	2.92238168333522e-10	3.01134377558817e-09	13.0075720526567
SEMA4C	1.24181293767972	-0.18772722151667	7.74362826941474	2.98709555856806e-10	3.07641018667238e-09	12.9858197441382
PLLP	-1.46966418552468	-0.341514316613541	-7.74205604254906	3.0044196151709e-10	3.09262710282218e-09	12.9800765993494
PLD4	1.73954684668553	-0.0537567858017229	7.73877185369496	3.040933351404e-10	3.12692826622073e-09	12.9680795923154
SLC25A33	-1.23407929216617	0.0473212957555265	-7.73772703654061	3.05264276620661e-10	3.137322788405e-09	12.9642628382002
JUP	-1.0562693605433	-0.0724023952129601	-7.73315629326253	3.1044018829361e-10	3.18550641380443e-09	12.9475652993927
SNX10	1.40767382929735	0.0971875546967004	7.73030795566854	3.13710085124128e-10	3.21569244683461e-09	12.9371595697379
GPC3	-1.51619479571259	-0.321209184421758	-7.72896102739478	3.15268373047834e-10	3.2299763948586e-09	12.93223878647
CLIP2	1.44205400008358	-0.101504248180936	7.71870288845676	3.27393834740834e-10	3.3472048863253e-09	12.8947602869571
COX6A2	-1.08845027707469	0.0349557108669909	-7.71297429977009	3.34367687746916e-10	3.41494127782793e-09	12.8738291029065
AASS	-1.48711351516272	-0.1838241358041	-7.70904010057195	3.39243223085447e-10	3.46112854203627e-09	12.8594536364278
PAQR4	2.6340873533918	-0.666096925586433	7.70804634980629	3.40485990663881e-10	3.47200048440239e-09	12.8558224133199
NCF1	2.08362860093032	-0.285743216151503	7.70747492173334	3.41202675888272e-10	3.47749934723569e-09	12.8537343668957
ABHD6	-1.07850623626774	-0.044351606807322	-7.70434259849401	3.45158205571446e-10	3.51415879012715e-09	12.8422883992288
ASCC3	1.09882394961496	-0.0486778846881977	7.70082270283507	3.49658085184909e-10	3.55638321692487e-09	12.8294257951072
SYT6	-1.31453898708263	0.281193015131903	-7.69988943093692	3.50861031278431e-10	3.56666252698442e-09	12.8260153106019
PKLR	-2.49179274179346	-0.190000386200338	-7.69851785594188	3.52636468848068e-10	3.58285233434592e-09	12.8210030692102
ZNF532	1.23031557784096	0.122692444948214	7.69794135373001	3.53385410663927e-10	3.58860138010482e-09	12.8188962987609
SMLR1	-2.08739403501598	-0.0551829899311528	-7.69775166481568	3.53632186813788e-10	3.58924765891426e-09	12.818203096945
MKI67	1.74244017992157	-0.286583819238988	7.6974640645827	3.54006670661746e-10	3.59118878793973e-09	12.8171520843785
ANXA2P2	1.1379758041996	0.181373436316057	7.69659268796761	3.55143719204169e-10	3.59899780386892e-09	12.8139676900429
PLAG1	-1.57841141782896	-0.18696207435193	-7.69512620713726	3.57065589032661e-10	3.61348868598617e-09	12.8086084661889
S100A10	1.34745620171762	-0.235063228917183	7.69505451073177	3.57159816498399e-10	3.61348868598617e-09	12.8083464513487
CHN2	-1.22612925692774	-0.198318871729848	-7.69493940884379	3.57311142070575e-10	3.61348868598617e-09	12.8079258106228
EPHX2	-2.31209248356344	-0.285512390520804	-7.69379133248351	3.58824053860894e-10	3.62691729325408e-09	12.8037301330682
ACSL5	1.36803068085493	0.0456180223155584	7.68965895318045	3.6432300752443e-10	3.68060135282026e-09	12.7886278796508
SKIDA1	-1.82951172875201	-0.478220858732614	-7.68509414725892	3.70495712775552e-10	3.73970360040127e-09	12.7719446292019
CYP4F12	-2.18293693871854	-0.259189553544848	-7.68241018520501	3.74173932181145e-10	3.77396383590122e-09	12.7621350899481
MIR4435-1HG	2.19560009018092	-0.284991683095884	7.68177223183646	3.75053585972461e-10	3.779267471195e-09	12.7598034176874
TMED2	1.09577793517647	-0.193249161462202	7.68141492924889	3.75547165189263e-10	3.78229644940615e-09	12.7584974975295
ASF1B	2.27251242546849	-0.0930049835294246	7.67888647343153	3.79058653617808e-10	3.81374258329334e-09	12.7492560221518
ODF2	1.26271138223678	-0.171820361417891	7.6785590799978	3.79515735439162e-10	3.81638219541926e-09	12.7480593882122
MCM10	1.77650797207066	-0.160955538507966	7.67808437237469	3.80179468277654e-10	3.82109610193526e-09	12.7463243099301
SLC27A4	-1.29701100997334	-0.0700200392262652	-7.6744337877853	3.85322749154938e-10	3.87080500291524e-09	12.7329810157458
VWF	2.31339251503386	-0.0673199756417564	7.6735642270243	3.86558124059561e-10	3.87766345993369e-09	12.7298026119249
LRRC19	-2.74998340478298	-0.670528985214171	-7.67353548126108	3.86599030599032e-10	3.87766345993369e-09	12.7296975404889
NUPR1	1.3227296496052	0.147877268800911	7.66639897599802	3.96890137965121e-10	3.97275271398284e-09	12.7036114032356
SCNN1B	-3.80912965440675	-1.05687016868748	-7.66500381176291	3.98933901053748e-10	3.9871012375076e-09	12.698511459999
AGXT2	-3.11284270809852	-0.393149534317178	-7.6628414708412	4.0212237281632e-10	4.01691966606884e-09	12.6906070268962
HJURP	3.07799176090069	-0.371463467390649	7.66252968452957	4.02584219864864e-10	4.01948452630233e-09	12.6894672806993
S100A11	1.57568980540293	-0.174308150506011	7.66035301140625	4.05823368313662e-10	4.04770086289031e-09	12.6815102894369
TEAD4	1.54967448791193	-0.246360694767972	7.65648372931328	4.11645989813898e-10	4.10368756579989e-09	12.6673654803122
IL12RB1	1.3291773765056	-0.284010538547272	7.65392325382236	4.15545073671149e-10	4.13935586041992e-09	12.6580049816069
CELP	-2.74179169324399	0.645450325436449	-7.6538570845695	4.15646325491423e-10	4.13935586041992e-09	12.6577630796725
RP11-433A10.3	-1.94959804932647	-0.182465516624801	-7.65296935919664	4.17007113135373e-10	4.15079858320984e-09	12.6545177153097
HPCAL1	1.5172607548454	0.433348617379241	7.65115634938591	4.19800159927404e-10	4.17647884995796e-09	12.6478896032274
ZNF503	-1.26029894042923	0.0210730549685357	-7.64743191110501	4.25596875481937e-10	4.22575030469347e-09	12.634273263029
RNF43	-1.59806427619215	-0.276176387530277	-7.64742025747718	4.2561513860222e-10	4.22575030469347e-09	12.6342306573564
QPRT	-1.75844337686342	-0.298397856806604	-7.64625707466991	4.2744199444928e-10	4.24122622735811e-09	12.629978039616
SGK494	-1.77368934422949	0.255491088593565	-7.64615247194291	4.27606664894108e-10	4.24122622735811e-09	12.629595608137
SCUBE3	-1.07028761012492	-0.0395676359244388	-7.64391294918719	4.31147528607074e-10	4.27202245357433e-09	12.6214077508577
SYN2	-1.17239181885155	-0.214005955565535	-7.64297089612958	4.32645762175391e-10	4.28470151231708e-09	12.6179634920399
TMEM45B	-2.40306808311613	-0.636166282520898	-7.64102607825509	4.35755322229116e-10	4.30896496486804e-09	12.6108529215713
KCNE1	-1.89799142525076	-0.106735977136512	-7.63942193019488	4.38337049120484e-10	4.33230853540714e-09	12.60498781107
NVL	1.93403764892467	-0.606659590922822	7.6386912683608	4.39518060857083e-10	4.34179156992841e-09	12.602316328992
DIRAS3	-1.47894098046051	-0.260586235936206	-7.63589624664085	4.44065347145107e-10	4.3845021353637e-09	12.5920968868296
SLC16A2	-1.29135861487481	-0.137028859710617	-7.63375542294092	4.47580188354536e-10	4.41698092223593e-09	12.5842692350325
KLRC3	2.47317548051975	-0.187123340678419	7.63301140877213	4.48808245718485e-10	4.42241971233614e-09	12.5815488097485
SPRED1	1.34204901326905	-0.213809874402441	7.63178268799198	4.50843754742016e-10	4.44024459758229e-09	12.5770560601883
TRG-AS1	2.54784049054311	-0.281585959729989	7.63161213942519	4.5112701768648e-10	4.44080282252e-09	12.5764324553197
SLC16A5	-1.55181483107622	-0.289457131893624	-7.62474562293079	4.62681052919552e-10	4.54540649432095e-09	12.5513245795934
HFE2	-1.99752512436107	-0.267363874595418	-7.62260564118112	4.66342226796017e-10	4.57678583023292e-09	12.5434993167461
SDC4	-1.0458802766882	-0.0832663398011526	-7.62046735791404	4.70029513810149e-10	4.60829001806615e-09	12.5356801343776
TLR3	1.81967711970455	0.026039353292274	7.61763254570795	4.74963019512705e-10	4.65207407267842e-09	12.525313715035
GCM1	-2.67258985287816	0.0834074899986498	-7.6128654535591	4.83376697990038e-10	4.72975531897492e-09	12.5078807709293
POLE2	1.87446133101674	-0.172761693713605	7.60473913031841	4.98065255536668e-10	4.86619189594375e-09	12.4781618797954
MTFP1	1.35896810838734	0.222735162575139	7.6045088331164	4.98487983107386e-10	4.86669691403046e-09	12.477319630117
LAMA4	1.44944525611223	0.0301364323260976	7.60444045128011	4.98613572293136e-10	4.86669691403046e-09	12.4770695417808
CDCA3	1.87930208822027	-0.116463136733059	7.6042520804674	4.98959695771395e-10	4.86765110872253e-09	12.4763806250887
DUSP5P1	2.8553324119617	-0.595674337335341	7.60180619698327	5.0347583957397e-10	4.9092651640847e-09	12.4674353616004
TRIM2	-1.32001267479049	-0.139003588400115	-7.59754416620408	5.11443530024079e-10	4.98447625307903e-09	12.4518475628535
DERL1	1.02443107104762	-0.0809677354866944	7.59498145605099	5.16295154505542e-10	5.02925881369489e-09	12.4424745622414
LGALS9	1.68527011768146	-0.214632549068186	7.59171286015819	5.22550161468722e-10	5.08766051397193e-09	12.43051955979
NPNT	-1.92952804018097	-0.491765463777675	-7.58280477153982	5.3998574349081e-10	5.24555637356874e-09	12.3979364797801
ZAP70	2.33584138377248	-0.275627217383978	7.58261886548561	5.40355760282936e-10	5.24555637356874e-09	12.3972564697513
ABCG1	1.47204913621901	0.00295614646971617	7.57575754951484	5.54191445730952e-10	5.3690549406233e-09	12.372158415432
FHL2	1.76597960979889	0.00173363419114991	7.57422559692997	5.57328783453103e-10	5.39411695155426e-09	12.3665545100369
COCH	-1.77100464497041	-0.241745659810275	-7.57309412612297	5.59657388755646e-10	5.41398083031684e-09	12.3624155344318
PCED1B	2.02516722209014	-0.158262723074868	7.56305153032589	5.80757667478747e-10	5.60151059297045e-09	12.3256778074414
C9orf66	-2.72080098052855	-0.282177991526369	-7.56106559519807	5.8502379849676e-10	5.63988264964978e-09	12.3184125796951
H2BFS	1.6252702619539	0.146076654737336	7.56035205031854	5.8656427650605e-10	5.65195341948971e-09	12.3158021654023
XCL1	2.12895118740501	-0.381002739201237	7.55818126546106	5.91275853492111e-10	5.69175611620427e-09	12.30786054449
BTN2A2	1.18146447344322	-0.220363738112849	7.55691170189919	5.94048941150258e-10	5.71564319960918e-09	12.3032159068302
MRGPRF	-1.89671979568724	-0.220519118607344	-7.55410098983397	6.00234813546321e-10	5.76384228843427e-09	12.2929329107136
ZNF844	-1.10822921429778	-0.17946721330691	-7.5474735529694	6.15077487338411e-10	5.90058917001738e-09	12.2686856606599
ORC6	1.37081427071141	0.0842880322045845	7.54636551918384	6.17594677057197e-10	5.92183858886692e-09	12.2646316869952
USP2	-1.7607327649243	0.022044735372595	-7.54586347197758	6.18738606424677e-10	5.92949106446918e-09	12.2627948325056
ABHD17C	-1.07521852052236	0.0152196320795308	-7.5457498278401	6.18997842640132e-10	5.92949106446918e-09	12.2623790386125
BCKDHB	-1.16348346096837	-0.0256877811762839	-7.54509602988712	6.2049135253141e-10	5.94089400012853e-09	12.2599869585597
LRRC6	-1.00155726504532	-0.222653155128792	-7.54050754410816	6.31075248663182e-10	6.03470220465727e-09	12.2431985739602
PARP8	1.09031074982176	0.0491560685628474	7.53782864473124	6.37337936362932e-10	6.08732271675297e-09	12.2333967688715
GPR4	1.94971846943798	-0.121643987051225	7.536055160861	6.41518197411228e-10	6.12426456457022e-09	12.2269076897844
RPRM	-2.31011013158624	-0.233739722554627	-7.53187063656605	6.51490762044239e-10	6.21643984678921e-09	12.211596459027
GBP4	1.54451153674451	-0.168807762786759	7.53146642181399	6.52462280266461e-10	6.22268040435152e-09	12.2101174104623
SERPINB9	1.02757462520478	-0.128939986125448	7.52785052880595	6.61217833675273e-10	6.30311688823039e-09	12.1968864523067
SLC4A4	-1.54182584719234	0.00187557577572	-7.52726045163179	6.62657788686679e-10	6.31377248442889e-09	12.1947272655047
SMIM3	1.781462405255	0.298461604061003	7.52662763466315	6.64205534357363e-10	6.32544425066567e-09	12.1924116781937
SLC6A3	3.67960682428826	0.775853784865591	7.52606194402665	6.65592169636958e-10	6.33557111836558e-09	12.1903417101391
KIAA1161	-1.06128740871442	0.106129919047966	-7.52537749246236	6.67273794985605e-10	6.34849471258391e-09	12.1878371639375
TGFBR3	-1.39776608754226	-0.140406979944468	-7.5251257142134	6.67893458541811e-10	6.35130708100968e-09	12.1869158539311
CDH3	-3.20622436936871	-0.779110456428639	-7.52438977665199	6.69708019133707e-10	6.36547403831306e-09	12.1842228941488
NAMPT	1.34252463255494	-0.0533062809799709	7.51789664551832	6.85933454358408e-10	6.51022264986462e-09	12.1604625537779
TAC1	-3.66485096463909	0.154559321458405	-7.51753949218707	6.86837278578802e-10	6.51564560642108e-09	12.1591555940437
TNFSF9	2.21438842981804	0.0254020364984909	7.51654741094532	6.89354141242721e-10	6.53635791689216e-09	12.1555251771149
RASSF10	-2.12276346013926	-0.402403768970592	-7.50603349646566	7.1660234338036e-10	6.77832496520834e-09	12.1170492962803
PHYHIP	-2.17410030619446	-0.234998615778124	-7.50443600455012	7.20835901264988e-10	6.81508095942716e-09	12.1112030346261
ACOT6	-2.85668643725265	0.206317767277461	-7.5018116825756	7.27845180303452e-10	6.86809710581e-09	12.1015988167444
SLC2A9	-1.64643648319085	-0.122690089404504	-7.4988276599906	7.35898223139919e-10	6.93407176698042e-09	12.0906780283439
ENPP1	-1.35996205603691	-0.254842636511459	-7.49283978644382	7.52328240217994e-10	7.07188545804914e-09	12.0687633261337
ST6GALNAC3	-1.557051053862	-0.0685172097113624	-7.49000474755941	7.60235006695009e-10	7.1427832676009e-09	12.0583872601425
ARRB2	1.05563498883462	-0.0833909585199789	7.48721477414305	7.68097398292222e-10	7.21319641069922e-09	12.0481759717245
RHOU	1.38454144024183	0.0934891472713061	7.48594544088675	7.71701415620655e-10	7.24357090265767e-09	12.0435301666015
FHL1	2.36771333626843	-0.0431561779139664	7.48502616692736	7.74322087448926e-10	7.26121463727823e-09	12.0401655708666
KIF20B	1.22919417708493	-0.0225542355968017	7.48457312940452	7.75616888882935e-10	7.26640315736933e-09	12.0385074211796
C7	-2.32124940779973	-0.373757017022107	-7.4828462485535	7.80572323583758e-10	7.30584382517578e-09	12.0321868764487
CST3	1.26336246141474	-0.114509797248999	7.48176500675735	7.83691182254396e-10	7.32803601192935e-09	12.0282294006497
IFIT3	1.13632074485077	0.0176447428759808	7.48129202058752	7.85059442100927e-10	7.33732952109493e-09	12.0264982067687
CAPN5	-1.07525534094111	-0.146397668093125	-7.47814250710602	7.94231644569877e-10	7.41598189705813e-09	12.0149704456763
FLT1	1.55781324789793	0.195342718623524	7.4765075822717	7.990352402893e-10	7.45728174972856e-09	12.0089862630279
CD36	2.42100774430697	-0.0798754195964292	7.47617791794218	8.00007353611552e-10	7.45952904635288e-09	12.0077796131435
CCRL2	2.00817502939235	-0.184017150068815	7.47368416722105	8.07399418392556e-10	7.52459400907071e-09	11.9986518239889
FBN1	1.65999778936239	-0.0835638794864118	7.47257628956014	8.10705352857652e-10	7.55181283776480e-09	11.9945966594007
TTC39C	1.44735182533812	-0.154044079502229	7.46868895965839	8.22412924997648e-10	7.65723083944366e-09	11.9803676801832
IFI44L	2.1522248919003	-0.0601613102135578	7.46627256447596	8.2977569209395e-10	7.71478832511828e-09	11.9715226891346
ESPN	-1.44066705436791	-0.00278922724911307	-7.4659207924458	8.30853037585502e-10	7.71748278845415e-09	11.9702350509951
OLR1	1.70996077368945	0.0435903515328155	7.46493741471805	8.33872196675865e-10	7.74185750007119e-09	11.9666354498718
GPR171	2.66700964610443	-0.561841632951717	7.46401348171651	8.36718866449498e-10	7.76093377356541e-09	11.9632534264949
MATN1-AS1	1.46958388238631	-0.192588811366251	7.46304473517279	8.39714068098302e-10	7.78503123020749e-09	11.9597073476888
PNO1	1.04638704214712	0.00487110570375547	7.4611514692309	8.45598784631536e-10	7.8358820709189e-09	11.9527770324785
CYS1	-2.10070830407573	-0.578558294563343	-7.46033264880687	8.48156657203285e-10	7.85587066376521e-09	11.9497797132246
FAR2	1.41469092872795	-0.0459033705683493	7.45782834446826	8.56027953659035e-10	7.92503158420568e-09	11.940612547959
LRRC43	-1.30564313483792	0.0673068146690382	-7.45673254533342	8.59495152552035e-10	7.94962033736071e-09	11.936601269533
CALML3	-1.51899959583049	0.543809429684077	-7.45534217839396	8.6391465251848e-10	7.97920041221003e-09	11.9315116658725
ERMP1	-1.01067376038409	0.0172481007444848	-7.455023107306	8.64932078734879e-10	7.98483457895662e-09	11.9303436632458
SMIM24	-3.15760678449847	-0.456355832740105	-7.45080338132636	8.78501070030284e-10	8.10246704542284e-09	11.914896616791
UBE2C	1.91532353377125	0.246042726721729	7.45047528168777	8.7956500583177e-10	8.10846404012082e-09	11.9136955372402
SPDL1	1.13494002545131	-0.0330049241003388	7.44328179463573	9.03218749659995e-10	8.31869561775669e-09	11.8873617487983
NRL	-1.5138910319128	-0.141542428292194	-7.44048801342564	9.12576239387446e-10	8.39698672101152e-09	11.8771340821176
MST1L	-2.35173898566978	-0.162132595209278	-7.44030819152458	9.13181851782921e-10	8.39861619572664e-09	11.876475773128
TK1	1.81291455947211	0.131387445715907	7.43433165514347	9.33540679513212e-10	8.57780767828385e-09	11.854595992419
MYO1G	1.39763657950777	-0.0699255348202094	7.4282571571969	9.54699348424799e-10	8.76811271311042e-09	11.8323569682778
EVI5L	-1.0490978970015	0.00865336902413825	-7.42536872961259	9.6492822276732e-10	8.85375853839734e-09	11.8217820863415
TMEM39B	1.02442159569464	-0.0769661363576327	7.42153996096475	9.7865661591873e-10	8.97357657754289e-09	11.8077642952723
ACSM2B	-2.12989103598458	-0.342685532335586	-7.421471924649	9.78902327811965e-10	8.97357657754289e-09	11.8075152003169
GOT1	-1.07287835061039	-0.209623722176595	-7.41827690415754	9.90510964702806e-10	9.07574773128111e-09	11.795817490348
RNF24	1.28427229413215	-0.170664604201888	7.41803607196648	9.91391563331733e-10	9.0795716120274e-09	11.7949357414173
RNF145	1.02778010136098	-0.00576601781031468	7.41220979814106	1.01293592496077e-09	9.25094650200655e-09	11.7736039720136
CDHR2	-1.81842909487414	-0.0915688198553583	-7.40946565011405	1.02324511240343e-09	9.34074567209824e-09	11.7635566270788
CCNB1	1.65940703397964	0.164249142914377	7.40712770634709	1.03211117129679e-09	9.41729369005855e-09	11.7549964571639
IL17RB	-2.45976058890136	-0.599160590369628	-7.40405943582681	1.04386370726822e-09	9.5200952995579e-09	11.7437621381876
TREH	-4.08312466944914	0.0083212658201841	-7.39835612440037	1.0660667828897e-09	9.70452525678368e-09	11.7228793820618
CD4	1.14587827429782	0.177209602901105	7.39729554864129	1.07024749740083e-09	9.73354092879765e-09	11.7189960169849
NCAPG	2.34670916385697	-0.197155798321604	7.39388426139839	1.08380626037443e-09	9.85228149215145e-09	11.7065052649899
C10orf25	1.9103063389764	-0.415014114312401	7.39313836482627	1.08679381171341e-09	9.8748594880719e-09	11.703774072032
GPER1	1.88204793347811	-0.0722919958173504	7.38591931735094	1.11613815464e-09	1.01227171183662e-08	11.677340234641
CA4	-2.38092831600886	-0.342174511932225	-7.38007068692963	1.14049304949928e-09	1.03340375761149e-08	11.655923907451
SMIM22	-1.99642380647213	-0.402601692758774	-7.37902394975794	1.14490771575339e-09	1.03692450651805e-08	11.6520909511078
CD180	2.39592978113602	-0.696601911603867	7.37736951099845	1.15192033306785e-09	1.04279383869731e-08	11.6460326757188
PROM2	-1.05245636418603	-0.126768803570895	-7.37535740359737	1.16050700464906e-09	1.04959745196664e-08	11.6386646304278
P2RY10	1.9112315740021	-0.443399917877467	7.37477389166864	1.16300911571856e-09	1.05137526102251e-08	11.6365278847014
HOXD8	-1.09831599389136	-0.0608046070956801	-7.37397818456421	1.1664298359461e-09	1.05398148246692e-08	11.6336141004933
TDG	1.05701727151157	-0.0449950406906333	7.3723105494571	1.17363168063195e-09	1.05951208239086e-08	11.6275073941804
AMDHD1	-1.98896006421771	-0.224901226242631	-7.36617914211809	1.20049585890552e-09	1.08276660555404e-08	11.6050545191421
ALDH2	-1.11683335237422	-0.156946615981456	-7.36505918796795	1.20546895657591e-09	1.08675188960125e-08	11.6009532589139
LAMP3	3.26253175161777	-0.642556245743439	7.3648950390425	1.20619958327317e-09	1.08691060379636e-08	11.6003521460088
AIFM1	-1.23507613174486	-0.26452295630518	-7.36466128903573	1.2072407699919e-09	1.08734889021467e-08	11.5994961535755
NUF2	3.07211155518483	-0.45164799635122	7.35923503098251	1.23166547595692e-09	1.10832927746922e-08	11.5796250147468
SOX11	2.68885532761576	-0.0944970872370151	7.35847824513182	1.23511103256341e-09	1.11041014345002e-08	11.5768536119095
TRPM6	-1.59591773404275	0.180793093595466	-7.35795192840146	1.23751298138541e-09	1.11205946456546e-08	11.5749261992014
KIF11	1.97982557619197	-0.0065003548694895	7.35723975636671	1.24077056811995e-09	1.11447581872515e-08	11.5723181648129
NEK6	1.05127484148761	0.0381484439193491	7.35466554095857	1.25261723759715e-09	1.12460124780882e-08	11.562891120799
HAPLN1	2.83826496659857	0.0016322990044144	7.35163855009141	1.26669263361067e-09	1.13619720485746e-08	11.5518058693033
POLH	1.20319872361346	-0.199810338695759	7.35102386130508	1.26957020914593e-09	1.1382573892521e-08	11.5495547829005
DBH-AS1	-1.62908920826266	0.194555183088659	-7.348489445499	1.28150402696343e-09	1.14738224871888e-08	11.5402733116915
PTHLH	2.87471527702922	0.0838166273222791	7.34676369190314	1.28969433459382e-09	1.15366130824757e-08	11.5339532615293
CD37	1.67758113639565	-0.167946092040972	7.3455339226181	1.29556270988194e-09	1.15838200506278e-08	11.5294495839613
ENO1	1.02657340095288	-0.121568736283954	7.34428002542938	1.30157376176057e-09	1.16269572273225e-08	11.5248575280342
DIRAS1	-1.16404783483497	0.0262548716622279	-7.34328027363163	1.30638647740028e-09	1.16646326061814e-08	11.5211961980916
IFITM2	1.06535644674503	0.0522315036445926	7.33908641860135	1.32677030927413e-09	1.18358540243348e-08	11.5058371837373
CXorf36	1.80008351931589	-0.0784701670731779	7.33851948540216	1.32955016851036e-09	1.18552564843651e-08	11.5037609092272
UPK1B	-2.38902443655806	-0.720238933013588	-7.33814412639538	1.3313938858791e-09	1.18662977577738e-08	11.502386233383
OR7E14P	-1.64508304559223	-0.468226688936064	-7.33622304061815	1.34087019296708e-09	1.19453249599827e-08	11.4953506256878
TLR10	1.38945560886496	-0.173450631490571	7.33286626528523	1.35759089530841e-09	1.2083079399772e-08	11.4830569908855
HSPB2	1.99269163865217	0.0340789405454527	7.33158791710678	1.3640133480724e-09	1.21294453760757e-08	11.4783752223756
GPR18	2.19031001702491	-0.07884924001546	7.33105502572585	1.36669958622955e-09	1.21423142296069e-08	11.476423578667
CYTIP	1.3444428334133	0.0424244022691231	7.32902240625278	1.37699450467931e-09	1.22237561920755e-08	11.4689793550392
CBR3	1.90344259115966	-0.138650139060479	7.32450811347725	1.40013739727318e-09	1.23944412146148e-08	11.4524461600113
GPT2	-1.70922592987716	-0.0954188999811004	-7.32299307655618	1.40799134731591e-09	1.24583396912165e-08	11.446897429149
MAGI2-AS3	-1.6289044870237	-0.110346907713937	-7.3225587178641	1.41025119025962e-09	1.24727044575353e-08	11.4453066128389
IL16	1.16368483956748	-0.264506783542312	7.32236262304139	1.41127260490087e-09	1.24761081567217e-08	11.4445884250915
EZH2	2.49247806715587	-0.335578525044	7.31956041027081	1.42594991963925e-09	1.2583157350297e-08	11.4343254186282
NEFH	-1.96648624249949	0.170379301775948	-7.31671281532053	1.44102156036047e-09	1.27047150524089e-08	11.4238961288099
ACSS3	-1.02957137069127	-0.158800152713206	-7.30482691355447	1.50567302624473e-09	1.32389796506822e-08	11.380363368654
STT3A	1.15341548560198	-0.113990893860157	7.30201087924369	1.52141129218012e-09	1.33713631907794e-08	11.3700493196981
MCM6	1.43160521080672	-0.195409842685308	7.30117427135497	1.5261185956673e-09	1.34067227057299e-08	11.3669851352199
SNHG17	1.16474616168502	-0.11512365602721	7.29879807231805	1.53956834504521e-09	1.35188172018553e-08	11.3582819697039
TNFRSF11A	1.68379191016916	-0.130582887943387	7.2943394369722	1.56512625222555e-09	1.37186535855852e-08	11.3419514710034
COL9A2	-1.07614593280918	-0.08947975113028	-7.29230352572069	1.57693743731642e-09	1.3816002160914e-08	11.3344945564016
NAT8B	-2.35861268652554	-0.544830103902508	-7.29195866594456	1.57894693711391e-09	1.38274267294439e-08	11.3332314385135
CSF1	1.08873846055428	-0.0171863035270737	7.2894595657769	1.59358603590583e-09	1.39493937997849e-08	11.3240779592337
ARHGEF26	-1.45177160864776	-0.144277587916891	-7.2892927739618	1.59456788472394e-09	1.39517571306716e-08	11.3234670476167
GRAMD2	-1.57763243042214	-0.0284397324470401	-7.28699198417959	1.60817385861903e-09	1.40645245225678e-08	11.3150398806402
PTPN22	1.77567351583554	-0.361175587077391	7.27652163236349	1.67157472896717e-09	1.46059710713454e-08	11.2766893889576
MT1HL1	-1.87532173964123	-0.505709381784081	-7.27292703341553	1.69391327312745e-09	1.47945660606172e-08	11.2635230419372
SLC2A1	1.56842843430074	-0.130780390001291	7.26451301140746	1.74737777824944e-09	1.52525584533095e-08	11.23270375685
FABP6	1.7529278438994	0.05082563153429	7.26355775228304	1.75355352580774e-09	1.52950135969319e-08	11.2292047635351
POLD1	1.01867051414131	0.0085555921709167	7.26276580818246	1.75869000861849e-09	1.53261740679919e-08	11.2263039689154
CDH13	2.9606226761353	-0.152441923385108	7.26245976827258	1.76067899105836e-09	1.53366877981124e-08	11.2251829812037
RIT1	1.15049327424979	0.0879633096911102	7.26146945742048	1.76713056439417e-09	1.53860470597785e-08	11.2215555873373
LEPROTL1	1.24434016552306	0.231750298679429	7.26018671455202	1.77552244282584e-09	1.54453903049017e-08	11.2168570415863
ATP8B3	1.83634076341927	-0.0864004847903165	7.25949048522106	1.78009396425627e-09	1.54782882011795e-08	11.2143068268775
FJX1	1.10899734496406	-0.0221393814885702	7.25683227666839	1.79765672598326e-09	1.56171428069796e-08	11.2045700673822
CDCA5	2.1313280465448	-0.0861296913596553	7.25662904238927	1.79900661101243e-09	1.56219453120216e-08	11.2038256385955
IRF7	1.12849370777183	0.0968405299801181	7.25619013717503	1.80192528944519e-09	1.56403603843385e-08	11.202217967826
BROX	1.02408143427086	-0.266480395912848	7.25553052395391	1.80632057457962e-09	1.56715701377539e-08	11.1998018615726
PGBD5	2.2772095716618	0.0746014174569986	7.25444131565723	1.81360194574794e-09	1.57277807675725e-08	11.195812181293
RBFOX1	-1.05986030312595	-0.218558455716087	-7.25372362060865	1.81841580063744e-09	1.57625525328143e-08	11.1931833205034
PHF14	1.04018951493352	-0.129910499485157	7.252683002746	1.82541835395158e-09	1.58162574354983e-08	11.1893716146354
CENPE	2.89063364586268	-0.63809981872828	7.25064115912502	1.83923694200788e-09	1.59219102590161e-08	11.1818924794767
HSPG2	1.7408395253838	-0.145568379174245	7.24941850839887	1.84756156162664e-09	1.59798583611299e-08	11.1774139839835
TRIP13	1.68523215109009	0.195429217920835	7.24762335635861	1.8598525557388e-09	1.60648965358858e-08	11.1708384396223
PANK1	-1.38866637421206	-0.155091596122227	-7.23885502311432	1.92107402369169e-09	1.65718000837735e-08	11.1387203318143
TGM2	1.20191364928341	-0.107777043893606	7.23696483540617	1.93453363379833e-09	1.66762243365953e-08	11.1317966021069
TINCR	-1.11423022041127	0.111937279610747	-7.23246389961543	1.96696510689784e-09	1.69378511116392e-08	11.115309694221
CAMSAP3	-1.22461368253141	-0.171152011293327	-7.23189877309436	1.97107539955807e-09	1.69657912849972e-08	11.1132396338877
DPEP2	2.79161981648693	-0.1980634237584	7.23095777658174	1.97793856789666e-09	1.70173915681329e-08	11.1097927584495
CDV3	1.00422689751898	-0.0702323204780509	7.23029961081146	1.98275312087146e-09	1.70513288354364e-08	11.107381892076
QSOX1	1.8874475067107	0.0948897745350269	7.22918879171115	1.99090550690838e-09	1.71139285218848e-08	11.1033129502495
HIST1H4J	2.09263370638843	-0.276899643302077	7.22821856853407	1.99805349924369e-09	1.71678432843828e-08	11.0997590099718
CLEC2D	1.71117730447837	-0.365560657821746	7.22704808253141	2.00671110457287e-09	1.72346761343224e-08	11.0954715009866
TBC1D10C	1.98101717634662	-0.247700826391824	7.22319445058922	2.03548108472852e-09	1.74557777309742e-08	11.0813555609969
C11orf54	-1.38061466941189	-0.224124297098519	-7.22093875819867	2.052512574946e-09	1.75895032603265e-08	11.0730928931237
AQP3	-1.42290248823005	-0.103643697577899	-7.21707069019519	2.08205096095271e-09	1.78270497089175e-08	11.0589240207039
DOK3	1.28451060357778	-0.164858551042307	7.21635656490234	2.08755071213554e-09	1.78663346756089e-08	11.0563081508414
CDC45	2.52119919887538	-0.198661446338117	7.21131484462643	2.12679491576287e-09	1.81783923044207e-08	11.0378401003411
RBM43	1.09090020685624	-0.166160618890222	7.20870931360245	2.14736467426139e-09	1.83462076071705e-08	11.0282959066126
MAP3K7CL	1.99417148489064	0.398437606425359	7.20800214559289	2.15298179942309e-09	1.83861831315439e-08	11.0257055123859
IFI27	2.07067927476636	0.332837430144642	7.20614924957063	2.16776944404998e-09	1.84882999712513e-08	11.0189182523463
CATSPER1	2.28381940189885	-0.711226167986661	7.18969978337865	2.30358909091478e-09	1.95955045975863e-08	10.9586628407089
LFNG	1.53165834040292	-0.286726012695237	7.1827195320847	2.3637675043177e-09	2.00957865539479e-08	10.9330937372984
HPSE	1.37101030381211	-0.0566876898568846	7.18264122691451	2.36445144106351e-09	2.00957865539479e-08	10.9328069006091
PPP1R1B	-2.17143258274845	-0.278239999607764	-7.18240806228028	2.36648913190485e-09	2.01043868644141e-08	10.9319528041316
PRR11	1.0662877083867	-0.0712747308193943	7.18216318279376	2.36863109449086e-09	2.01138651737116e-08	10.9310557954616
ADAMDEC1	3.48910819473867	0.188621591824667	7.17455152116599	2.4361867737387e-09	2.06446490840739e-08	10.9031738334751
SLC13A1	-3.0564825095324	-0.789807827309576	-7.17419548350603	2.43939349972009e-09	2.06610515129706e-08	10.9018696481229
COL5A1	2.23685395123706	-0.159919366447521	7.1735932627352	2.44482714334269e-09	2.06891913568106e-08	10.89966368097
FA2H	-1.26183066403281	-0.234489629823302	-7.1674353724254	2.50108779833669e-09	2.11379127898235e-08	10.8771070256757
REEP1	-1.29577565714929	-0.0723165052299053	-7.16648410453912	2.50989372130304e-09	2.1203192691301e-08	10.8736224899176
MILR1	2.31428155564336	-0.392650322649696	7.16424039767361	2.53078690427513e-09	2.13612801623119e-08	10.8654037002716
CDK1	1.67272853171216	-0.119643160439064	7.16209867365656	2.55089278870469e-09	2.15217166447797e-08	10.8575584870325
RP3-406A7.7	-1.66751805156382	-0.381685522418287	-7.16176697938055	2.554020902743e-09	2.15388363480465e-08	10.856343479634
ETV7	1.64246752613039	-0.230799728213827	7.16093806654797	2.56185493786929e-09	2.15863262800087e-08	10.8533071447992
RP11-401P9.4	-2.24809197305232	-0.301093117246669	-7.15968658736545	2.57372822430459e-09	2.16770517697231e-08	10.8487229384417
EDNRA	1.57276579856791	-0.0123900606909219	7.15420017019586	2.62643341088286e-09	2.20780246974242e-08	10.8286260690995
DSN1	1.12912935330428	-0.0775904773525086	7.15408207607882	2.62757967694901e-09	2.20780246974242e-08	10.8281934885359
HS6ST3	-1.21222785446524	-0.0754105625524315	-7.15402901370608	2.62809488336602e-09	2.20780246974242e-08	10.8279991202622
SOSTDC1	-3.73969912134873	-0.7721864529034	-7.1531551870586	2.63659381436961e-09	2.21399323769623e-08	10.8247982811328
OTOGL	-3.46691279829063	0.258492030708751	-7.15278722646694	2.64018086286282e-09	2.21605587714126e-08	10.8234504370066
AQP1	-1.93594021088687	-0.490184542344675	-7.1499932825823	2.66757731446997e-09	2.23713512136487e-08	10.8132161990588
F11	-1.85538574692627	-0.314704271127972	-7.1496131636555	2.67132655059037e-09	2.23932117472287e-08	10.8118238222659
CLUHP3	-1.12766849552691	-0.148147952474876	-7.1465258249971	2.70197397703586e-09	2.26269542587588e-08	10.8005149077492
ABCA1	1.08715403427646	0.00437765416002472	7.14645575653847	2.70267360170184e-09	2.26269542587588e-08	10.8002582474933
MIR34A	1.57072145461643	-0.250229577659253	7.1448158461404	2.71909977175617e-09	2.2754755092506e-08	10.7942512721882
FBXW4P1	-1.75502001876883	-0.0703756206052535	-7.14417010287619	2.7255952438236e-09	2.27993773724706e-08	10.7918859235622
C2CD2L	-1.45613574647246	-0.108654087545426	-7.14372755067302	2.73005580091163e-09	2.28269469462743e-08	10.7902648617951
EGFR	1.20983641534419	0.271267471685941	7.14270274237144	2.74041307842921e-09	2.29037765134901e-08	10.7865110076836
TNFRSF9	1.79840410682	-0.155866806656218	7.14148216275672	2.75280024738008e-09	2.29974987418594e-08	10.7820400516452
FAM101B	1.27592489361395	0.114022021265019	7.13798683016007	2.78858381046958e-09	2.32765988506786e-08	10.7692367560799
TSPAN8	-3.59629145826344	-0.931291042414039	-7.13593130578988	2.80984426605847e-09	2.3444077382069e-08	10.7617074554937
CLEC14A	2.5161289523603	-0.0655689177121777	7.13436525553906	2.82615084937189e-09	2.35700980837616e-08	10.7559710896671
MUC13	-2.52407893191744	-0.0446517786113459	-7.13355407413455	2.83463451432125e-09	2.36307961914854e-08	10.7529997756366
MST1	-1.62649140582667	-0.159722347830917	-7.13332681343752	2.83701586564694e-09	2.36405926661625e-08	10.75216733237
FAM132A	-1.14136462649981	0.104598040082657	-7.1331066784356	2.83932445906531e-09	2.36492926641355e-08	10.7513609903345
SPC25	2.36293731887503	-0.284482796283578	7.13299720410039	2.84047323492907e-09	2.36492926641355e-08	10.7509599921253
AKR1B1	1.61632047331808	0.258035846616658	7.13164064789826	2.85474699207122e-09	2.37479568325993e-08	10.7459910088209
SVOPL	-2.4246244971735	0.209448154343653	-7.126467892071	2.90983676751726e-09	2.41857043284863e-08	10.727043591848
HPCAL4	-1.09657247398342	0.0482804062968898	-7.11919667698218	2.98907842494836e-09	2.48338058713705e-08	10.7004098913801
C3orf70	1.47141078233198	-0.0760126318259732	7.11726600592595	3.01047925657329e-09	2.50010097243982e-08	10.6933380906798
CORO2B	-2.5150351309948	-0.170533806872214	-7.11619526229862	3.02241410648497e-09	2.50894934659039e-08	10.689416102603
SLC22A11	-2.75778056291588	-0.431860321786202	-7.10974301164837	3.09534182400467e-09	2.56839984795375e-08	10.6657825233465
ATP13A3	1.11894837859256	0.0267121233974359	7.10514214702505	3.14841679776585e-09	2.61022930708176e-08	10.6489304301548
TNNI1	-2.71796111858761	0.598642797520322	-7.09990690020371	3.2099183169533e-09	2.65672251241418e-08	10.6297548780504
MPC1	-1.5318956545391	0.015963352564236	-7.09954295927504	3.21423816061103e-09	2.65917491387993e-08	10.6284218495531
PLEKHG3	-1.1229626763114	-0.115770783510026	-7.09915929801485	3.21879837516795e-09	2.6618240234142e-08	10.6270165911659
MSRB1	-1.10700782527548	-0.0885077866288462	-7.09738185573256	3.24000973751212e-09	2.67823495763391e-08	10.620506263078
L2HGDH	-1.08707677350427	-0.15069091410726	-7.09425637180026	3.27764787463497e-09	2.7082049196868e-08	10.6090584473661
DGKA	1.27589127786209	-0.120559409615491	7.09300193900305	3.29287691287189e-09	2.71964157671201e-08	10.604463813345
RIMKLA	1.6873891083756	-0.0135784268433325	7.09221271193854	3.30249452989638e-09	2.7259826065376e-08	10.6015731026994
NFATC2	1.28634015196209	-0.136831393197481	7.0913120371673	3.31350460337702e-09	2.73322292599269e-08	10.5982741968459
CRIP1	2.24509256348619	0.181351798643397	7.08448768440513	3.39812920673632e-09	2.79831656818593e-08	10.5732788041318
RARRES2	1.89343479972146	0.393543917323688	7.07559694309271	3.51162950418602e-09	2.88935460338127e-08	10.5407154516854
CMKLR1	1.07507309733074	-0.154187706437885	7.07290978109871	3.54667477826637e-09	2.91451903476908e-08	10.5308735449891
SLC30A8	-1.51605113446383	-0.0482145036400565	-7.07086406559382	3.57358885155388e-09	2.93294672954792e-08	10.5233810201941
GINS1	1.47568078867169	0.0291105437617425	7.07058611611695	3.57726137313856e-09	2.9347319234886e-08	10.5223630206204
LHFPL3-AS2	-1.99836140374049	-0.441535125446135	-7.06975223178985	3.58830208254468e-09	2.94255784584908e-08	10.5193088945585
BARD1	1.51427758791976	-0.232804850830362	7.06505982011991	3.6510686996265e-09	2.99027561404011e-08	10.502122915208
AGR2	-2.23543494737367	-0.578255193525758	-7.06469543438118	3.65598850400911e-09	2.9930542477057e-08	10.5007883592455
GMIP	1.12287016375626	-0.115435855250775	7.06406453385598	3.66452238067493e-09	2.99878806425252e-08	10.4984777007912
S100A9	1.79149091898353	-0.254558866389353	7.06339080876805	3.67365752605681e-09	3.00500892542518e-08	10.4960102025038
BTG1	1.01894453806282	-0.0881025054897642	7.05530383018773	3.78510428771621e-09	3.09358877960592e-08	10.4663922228988
RPA1	1.03979591127356	-0.13176387929912	7.05499102129552	3.78948239770587e-09	3.09587601136463e-08	10.4652465957014
EYA4	-1.57608361284169	-0.0759885668639279	-7.05304309523901	3.81686001450982e-09	3.11694330934908e-08	10.458112559072
ANGPTL3	-2.54759159830287	-0.328857872745577	-7.05139599090407	3.84016397395008e-09	3.1346677936463e-08	10.4520802748122
GIMAP6	1.37922780709264	0.194173745674115	7.05120802081864	3.8428324891008e-09	3.13554013130252e-08	10.4513918630148
MIR10A	-1.45814042296276	0.0151767952111785	-7.04723594409036	3.89965777703568e-09	3.17925926672722e-08	10.4368448237041
SGK223	1.03548243939051	-0.0603603545214339	7.04471782655841	3.93611698123389e-09	3.206315740449e-08	10.4276227436901
IFIT2	1.0351393968241	0.0560820677971663	7.04238810817144	3.97015196674835e-09	3.23269665127964e-08	10.4190906975802
CCDC102B	1.73724906724716	0.00653940522767216	7.03814756275147	4.03285962862087e-09	3.27966870793944e-08	10.4035608510786
IGFBP2	-2.3744842640239	-0.447272337424861	-7.03464163711045	4.08545140255329e-09	3.31555950470567e-08	10.3907215042762
CDCA7	1.6012575882611	-0.211232539151554	7.0344095472673	4.08895705194697e-09	3.31703101246311e-08	10.3898715534461
FAM83B	-1.77571228737916	-0.381138399489338	-7.02838873197005	4.18095863612019e-09	3.38885890443836e-08	10.3678225688628
LCN12	-1.45265657912066	-0.220962926231087	-7.02545757987187	4.22649480079028e-09	3.42435186443525e-08	10.3570884783952
GLTPD2	-2.47403606025569	-0.436470883562628	-7.02471670353972	4.23808281414758e-09	3.4323216972925e-08	10.3543753525332
BHMT	-2.61994239330915	-0.470711480287875	-7.02428486579102	4.24485182157539e-09	3.43638376088625e-08	10.3527939444256
BRCA1	1.28524525708533	-0.275088548754931	7.02376012291404	4.25309166015141e-09	3.44112955968048e-08	10.3508723169299
PTGDS	-2.35425884252284	0.0637832422089231	-7.02368798359545	4.2542256865686e-09	3.44112955968048e-08	10.3506081403906
HRSP12	-1.31635827424979	-0.06655773356051	-7.01672836531674	4.36506455168051e-09	3.52641797808682e-08	10.3251221009371
IHH	-1.4862536633999	-0.127795372756917	-7.01457628184615	4.39991976059377e-09	3.55311196488988e-08	10.3172413233086
SPATA17	-1.3478238905698	-0.0721398231913242	-7.01037030805934	4.46884543572775e-09	3.604316942174e-08	10.3018395215185
ADAM9	1.22324791406777	-0.193489441941605	7.0088383033161	4.49421866488301e-09	3.62180064198364e-08	10.2962295519839
PABPC4L	2.31130510848126	-0.125697493073166	7.00785510471996	4.51057835485706e-09	3.63248948757924e-08	10.2926292443523
VSIG1	2.01970775058008	0.266435228859015	7.00781847191731	4.5111890467717e-09	3.63248948757924e-08	10.2924951014558
SPIN4	1.0016443570999	-0.03214669701359	7.00384088627878	4.57799220071888e-09	3.68174268124289e-08	10.2779299909663
GALNT11	-1.00660623919883	-0.178170590101672	-7.00340394837887	4.58539056997035e-09	3.68618005663859e-08	10.2763300265851
ST6GALNAC2	-1.71556237130124	-0.298951129983798	-7.00207827792433	4.60791048545134e-09	3.69973115953957e-08	10.2714757479315
GDA	-2.09357200103387	-0.126831530994739	-6.99310263660144	4.76332188343407e-09	3.82138131778241e-08	10.2386098242186
COL1A1	1.64903226619113	-0.0100854802855039	6.9860638059379	4.88885587226123e-09	3.91567986270731e-08	10.2128367155583
PART1	-1.20582445298425	-0.193074655170551	-6.98304782830062	4.94365167825098e-09	3.95471956089963e-08	10.2017937612069
LGSN	-3.23724419980178	-0.217703269089607	-6.98231247091498	4.95710488174172e-09	3.96386367104268e-08	10.1991012832875
SLC26A9	-2.0701644814425	-0.272612898738856	-6.98019616716578	4.99602681879469e-09	3.99335765177639e-08	10.19135258001
DHRS9	1.56977910362977	-0.151208625136369	6.9757092750014	5.07956103131437e-09	4.05516564776905e-08	10.1749243633719
PPFIA4	3.13164695482002	-0.127527568204365	6.97411340132441	5.10960751710166e-09	4.07583222334861e-08	10.1690813420033
CD151	1.04073631115638	0.118246458663994	6.97333562108683	5.1243156036084e-09	4.08257973638704e-08	10.1662336463752
MYOM2	-1.40213845683101	0.0936172383035891	-6.97159962619982	5.15729671613619e-09	4.10218580923511e-08	10.1598776644201
ATP1B2	-1.5657027872835	-0.0605581615693334	-6.969574946673	5.19603058411403e-09	4.12964328540352e-08	10.1524647871062
CD200R1	1.52751652830722	-0.230440909646474	6.96914343453584	5.20432331136621e-09	4.13455746167273e-08	10.1508849179924
CDKL1	-1.37767121809773	-0.10746328157399	-6.96829663910378	5.22063536584975e-09	4.14583600224025e-08	10.1477846065043
GPR82	1.73444860685522	-0.280034904007584	6.9661548997567	5.26212079483578e-09	4.17539698210471e-08	10.1399432634774
CX3CR1	1.27043292597873	0.0949155870519397	6.96478515400254	5.28882537080697e-09	4.19488824129688e-08	10.1349283866735
KRBA1	1.9274386437921	-0.0588792049470295	6.96354085711691	5.31320162677293e-09	4.21251774608101e-08	10.1303728277209
HOXB8	-1.43410837266633	0.0511860046057041	-6.96192465436181	5.34503144515458e-09	4.23604008465769e-08	10.1244557049199
FZD1	1.23379429390321	0.116265713742721	6.96057857954447	5.37168677289831e-09	4.25544418197389e-08	10.1195275891839
GRIP2	-1.80691401725545	-0.0849832698544778	-6.95954905047433	5.39216343883329e-09	4.26993984798762e-08	10.115758400662
FAM167A	-1.22247800075192	0.150911026724344	-6.95874744117031	5.40816095003456e-09	4.28087828997283e-08	10.1128236575291
LYL1	1.53147064389301	-0.262123087083035	6.95756850168679	5.43177499473281e-09	4.29783440136328e-08	10.1085075048986
NPPA	-1.35155419430062	-0.0347091534118721	-6.95425087134923	5.49878147906868e-09	4.34909677999464e-08	10.0963616370791
FRMD7	-2.02608975264986	-0.335523202315179	-6.95212718205475	5.54210699262467e-09	4.37982882856657e-08	10.0885868991129
PSMB8-AS1	1.12879250951105	-0.193493480514544	6.95140237791481	5.55697174596107e-09	4.38980609629549e-08	10.0859334400107
S100A14	-1.40030653543838	-0.248175172304992	-6.94628038979437	5.66315906001605e-09	4.46469245443502e-08	10.0671824602136
DTX1	-1.75944110087162	0.000833302659546633	-6.94597880625273	5.66947424875268e-09	4.46787397673115e-08	10.0660784143675
HOXA4	1.69510687259989	0.202304999791208	6.94534239351738	5.68282390673323e-09	4.47659428247848e-08	10.063748621568
MOGAT2	-1.34236725128206	-0.0455380161223454	-6.94397199728272	5.7116766918628e-09	4.49751512590675e-08	10.0587318725575
TIGIT	2.67802513951993	-0.360584166336468	6.94294699900529	5.7333530434417e-09	4.51277053407285e-08	10.0549795800052
RP11-63A11.1	-2.16473110587196	-0.374050203820618	-6.94116730169736	5.77118508023708e-09	4.54072486501672e-08	10.0484645478291
C4orf46	1.25523914973114	-0.203697667403377	6.93239913282684	5.96125013530093e-09	4.67712335475432e-08	10.0163673331999
WDR76	1.24257565786634	-0.208396576162168	6.93188065360306	5.97268301032228e-09	4.68421826007629e-08	10.0144694080171
PTPRCAP	2.29414054554061	-0.250467663281769	6.92323231640688	6.16665023092645e-09	4.82668441996516e-08	9.98281242587253
PPP1R15A	1.13946447118073	0.236483098936423	6.91987091806673	6.24372876675153e-09	4.88116633823547e-08	9.9705085356851
ENOX1	-1.23240917457317	0.16820714531575	-6.9141717235026	6.3766210337913e-09	4.97711651299386e-08	9.94964803128279
CDCA4	1.05840047680746	-0.0540577308378464	6.91405481866132	6.37937637707665e-09	4.97728493687601e-08	9.94922013690497
EPHX1	-1.22323214537117	-0.111992726359922	-6.91325144585909	6.39834337640409e-09	4.99009677016092e-08	9.94627964455768
PRDM16	-1.66316500699764	0.0381328571195611	-6.91133561002358	6.44380254955659e-09	5.01955827379807e-08	9.93926738802074
SLC16A1	1.72314580678054	-0.0850559675117987	6.90959231283791	6.48544817164743e-09	5.04798644623185e-08	9.9328867178238
RAB9B	1.4476714545177	-0.134388330958571	6.90892759264173	6.50139842222740e-09	5.05839252390769e-08	9.93045378187469
H2BFXP	1.5287191240442	-0.275421887100357	6.90410533112621	6.61829069133035e-09	5.14117634797398e-08	9.91280415581991
CRISP2	-2.33994744595415	0.0627979882630724	-6.90303352081082	6.64455552748029e-09	5.15953422278471e-08	9.9088813659521
COL21A1	2.51854943314431	0.180792561299544	6.901528983324	6.68160024681269e-09	5.18624488068443e-08	9.90337485183936
STAC2	-1.30645259551295	0.0412654970512824	-6.90018796530692	6.71479274470797e-09	5.20994548707567e-08	9.89846685112018
WWC1	-1.12062412498559	-0.198565607476124	-6.89530300178837	6.83710367040365e-09	5.30064852991461e-08	9.88058868072639
FERMT3	2.11595247166295	-0.404630506928968	6.89498866675209	6.845049889923e-09	5.30387507476538e-08	9.87943828413072
PLEKHA6	-1.20537114683393	-0.177019530829747	-6.89492431280909	6.84667786068494e-09	5.30387507476538e-08	9.87920276323245
CDKN2C	1.16638685647686	0.122096616753973	6.89420027784018	6.86502056509041e-09	5.31598332892955e-08	9.87655296523545
CLUL1	-1.77787078656786	-0.263787912077906	-6.89058937996753	6.95723491996489e-09	5.3788894357551e-08	9.86333810540719
PLEKHH1	-1.04310590198571	-0.135408026175419	-6.88896657080105	6.9990800899109e-09	5.40910767674147e-08	9.85739918273967
CDC42EP5	1.1769147965496	0.0627929707405308	6.8881265691415	7.02083877021776e-09	5.42378474802908e-08	9.8543250898996
BASP1	1.56212550386846	0.138789743516366	6.88662408932194	7.05992645276205e-09	5.45183209407736e-08	9.84882661495511
GUCY1B3	1.21507289910595	-0.0645086817278506	6.88081135569116	7.21320648323249e-09	5.56143327556544e-08	9.82755483489887
TNNT2	-1.35275078905623	-0.107565555974372	-6.87516278474543	7.36534313048256e-09	5.66980989844178e-08	9.80688458187898
ZNF320	1.41031606900711	0.0882569818009181	6.86487808503129	7.65062941808086e-09	5.88249062239964e-08	9.76925098502532
HN1L	1.07233407724077	-0.0262808225367868	6.8624775793334	7.71879077918811e-09	5.93024619683684e-08	9.7604674752263
ITPR1-AS1	-1.21700342903224	0.0997779151624284	-6.86008419824553	7.7873539520789e-09	5.97589467920104e-08	9.75171017991021
KLHL3	-1.59176632072121	0.298336525202228	-6.85956331224485	7.80235621944414e-09	5.9850637786648e-08	9.74980429611094
SEMA3G	-1.25334360492821	-0.261263444217426	-6.85857316602101	7.83095352929438e-09	6.00173779201844e-08	9.7461814426023
EVA1C	1.58428779772065	0.0556924544258133	6.85849277738778	7.83327989794538e-09	6.00173779201844e-08	9.74588730912711
APOLD1	2.5745983340084	0.162079582467479	6.85372019552733	7.9726384534301e-09	6.10373988471783e-08	9.72842523746436
HFE	1.01307234934136	-0.193481826145276	6.85332512674767	7.98428481711725e-09	6.11017128216791e-08	9.72697977394546
RAB7B	1.93890756782747	-0.514888706899404	6.85322381147655	7.98727426139813e-09	6.11017128216791e-08	9.72660908591159
ZNF488	-2.08410293999034	0.418452648506521	-6.85288437512981	7.99729794322058e-09	6.11545229766602e-08	9.72536717249865
RBPMS2	-1.70641530729584	0.0722309681717855	-6.85134534349962	8.04290404851704e-09	6.14792809855247e-08	9.71973627525901
AOX1	-2.19856947148799	-0.678918569130163	-6.84613528775755	8.19923123614968e-09	6.26346300328265e-08	9.70067456481035
MRAP2	-2.14549868701144	-0.450764139501658	-6.84609532762384	8.20044189316969e-09	6.26346300328265e-08	9.70052836791168
MYBL1	1.30993212345614	0.0825609248643984	6.84143567121983	8.34284545114175e-09	6.36478894499522e-08	9.6834809879837
LMAN1	1.33532444905255	-0.0949276536671128	6.8410889951711	8.35353842926141e-09	6.3704669134278e-08	9.68221269504588
RHBDF2	1.84897776186954	-0.109079214670212	6.83978643580441	8.39383747896871e-09	6.3962216465905e-08	9.67744739110048
ITGB2-AS1	2.01034538482084	-0.211427114518761	6.83589379222015	8.51543079934475e-09	6.4838355958181e-08	9.66320675767188
REEP3	1.10909342277648	-0.117188305664688	6.83550794249028	8.52757892196501e-09	6.49056385598417e-08	9.66179520886804
SELM	1.01300379692556	0.118508031888651	6.8294738317768	8.71982575304149e-09	6.62916465996355e-08	9.63972124097788
LIMD2	2.15633167134363	-0.0653377176618685	6.82784399372104	8.77249111162528e-09	6.66403307351721e-08	9.63375914625854
BCL11A	1.9253381263795	-0.192252324055485	6.82668803935638	8.81003626079655e-09	6.68996128149367e-08	9.62953060625058
USP44	-1.64245671298776	-0.0701145131137046	-6.82606826299114	8.83023253214677e-09	6.7001055903037e-08	9.62726344827083
RSAD2	1.69799928915964	0.05048872286388	6.8245210869527	8.88085149490894e-09	6.73590589971828e-08	9.62160388586777
PAX8	-1.14160791097257	-0.264435602693247	-6.82407134631483	8.89561996928690e-09	6.74326089366209e-08	9.61995874958501
AC013463.2	-1.62399867734388	-0.140161710510838	-6.82401628321767	8.89742980305637e-09	6.74326089366209e-08	9.61975733100473
COL5A3	1.55954580790337	0.281477221579836	6.82154550763152	8.97901987010774e-09	6.79983811569712e-08	9.61071942316025
PNCK	2.71279359169676	0.252809255151899	6.81868185596776	9.07451915312525e-09	6.86420304446552e-08	9.60024462426327
RASD1	-1.82320422618411	-0.275541556430195	-6.8096931774158	9.38092186946605e-09	7.08503613563256e-08	9.56736696818603
CP	3.51239083959043	0.864878525770437	6.80918069084798	9.39869949417529e-09	7.09572848175429e-08	9.5654925311726
TNFSF15	-1.3001814402091	-0.0788451862246994	-6.80768481282778	9.45078266117364e-09	7.13230224783759e-08	9.56002135130904
FOXP1-IT1	-1.03243225779295	-0.0560984290042223	-6.80546939930145	9.52844863504813e-09	7.18814722087407e-08	9.55191859042604
THY1	-1.20769956547459	-0.0945852154429438	-6.79999552945727	9.72309147563453e-09	7.31527331404842e-08	9.53189882835536
DDC	-2.87964373164434	-0.54601094044413	-6.79239487894419	9.99996302599156e-09	7.50629166397581e-08	9.50410224278047
SHROOM3	-1.33872174500898	-0.368759670619794	-6.7902556968392	1.00792983258827e-08	7.56005234936757e-08	9.49627929376746
C20orf203	-1.00508123167831	-0.0757248339501044	-6.78971570695168	1.00994239776632e-08	7.57224982931223e-08	9.49430458348782
IFI6	1.30962002573014	0.0373632673136159	6.78842752883306	1.01475971639967e-08	7.60545915170831e-08	9.4895938312201
PRAP1	-2.74157722174593	-0.387852246601555	-6.78597738624565	1.02398579420517e-08	7.66874191082424e-08	9.48063402322595
PMAIP1	2.20724934554628	-0.22266654376673	6.7794510006815	1.04897195044415e-08	7.84387686255433e-08	9.45676893206895
CPNE6	-2.34080379290212	0.724436563204424	-6.77602129542527	1.06234567509153e-08	7.93479911818556e-08	9.44422804852244
AIM2	2.40738678104748	0.100031684776228	6.77384195192609	1.07093211462727e-08	7.99284025688492e-08	9.43625937223079
LOXL2	1.14431751963848	0.244469601997895	6.77270841946132	1.07542550885013e-08	8.02332110694847e-08	9.4321147207086
TPM1	1.11537141914976	-0.183834361571922	6.77075500149405	1.08321321057409e-08	8.07527413999302e-08	9.4249723364931
VNN2	2.0832210684517	-0.15631032318997	6.76827370566149	1.09318666998828e-08	8.14033645330558e-08	9.41590002661264
ARNT2	-1.52963520158527	-0.373444337781609	-6.76292832081971	1.11498490753826e-08	8.29635125392652e-08	9.39635650508424
GPR176	1.19473624517043	-0.145424870495423	6.76103443185019	1.12281180473584e-08	8.34825059219189e-08	9.38943239577838
PROX1	-1.30705008407725	-0.0127232986751496	-6.75945432481872	1.12938390282459e-08	8.39393064522532e-08	9.38365557461368
PTGER3	-1.699401114546	-0.391235378465942	-6.75157999875564	1.16271259805696e-08	8.6285513855806e-08	9.35486856023321
UCHL1	-1.71066131370632	-0.35769399134586	-6.74827811794314	1.17697869442748e-08	8.72781136287713e-08	9.34279815922505
ACYP1	1.03750742834397	-0.0520074547685836	6.74781913723899	1.17897555453386e-08	8.73931236509424e-08	9.34112033312816
B4GALNT3	-1.09430415568262	-0.129507983524837	-6.73933961948475	1.21648153845196e-08	9.00711056748017e-08	9.31012438166965
AFAP1L2	-1.11310356205196	0.0290856308486981	-6.73618161365116	1.23075228838992e-08	9.10245815100153e-08	9.29858128960487
ESM1	2.36725384731095	0.237066156114647	6.73365537310559	1.24228840337457e-08	9.18431173811327e-08	9.28934767411528
GRIK5	-1.0621991230787	-0.00255831337152943	-6.73103954318785	1.25434742532702e-08	9.26647387447577e-08	9.27978684568285
TMEM54	1.41652694363575	0.0063438062137156	6.73058825820859	1.25643964758606e-08	9.27843280069298e-08	9.27813742941669
FBLN2	2.32561574105782	-0.339895970874078	6.72897915639499	1.26392807932887e-08	9.32319398824487e-08	9.27225633095989
GJB4	-1.3026099412388	0.108488294477188	-6.72723079943302	1.27211510158715e-08	9.37652646709534e-08	9.26586637700327
LRRN2	-1.68348281405026	-0.150917746727098	-6.72502682767427	1.2825111188115e-08	9.4495997810476e-08	9.25781138690985
ALDH1B1	-1.13019843092538	-0.081517027962689	-6.71799761047938	1.31623764898417e-08	9.68229628282058e-08	9.23212248160834
EXOC3L1	1.3980038959163	-0.352123668366479	6.71793066665739	1.31656306922378e-08	9.68229628282058e-08	9.23187783827568
DOCK10	1.54959001127478	-0.113106190378132	6.71579335405127	1.3269950791823e-08	9.7553550475971e-08	9.22406720946661
SMTNL2	-2.21954179609253	-0.44545218178256	-6.7147940241923	1.3319009843785e-08	9.78774930364987e-08	9.22041530183494
PRR3	1.4072510797936	-0.150248385944984	6.71118905365028	1.34974945878951e-08	9.91147982121228e-08	9.20724176877507
THRSP	-1.49988271429384	-0.263554677739667	-6.71050626984712	1.35315677279704e-08	9.93277887267756e-08	9.20474674864048
SLA2	1.34608057890694	-0.476041514783961	6.70969084836807	1.35723724608655e-08	9.95900141746547e-08	9.20176706889776
ITPR3	1.30183505574697	-0.176251240265426	6.70857401902199	1.36284594606305e-08	9.99267403549933e-08	9.1976860382069
KCNN2	-1.49680867072431	0.1319680459878	-6.70825352822344	1.36445971483507e-08	1.0000765127544e-07	9.19651493456333
LIME1	-1.76542328224711	-0.14236244968999	-6.70626408606117	1.37451992782294e-08	1.00669716238422e-07	9.18924541340881
TTK	2.59827484474927	-0.489780255596434	6.70549403318857	1.3784337816676e-08	1.00918654041477e-07	9.18643164266388
IL7R	2.09935571995579	0.0160737402314566	6.70211802016102	1.39572436932089e-08	1.02108256492423e-07	9.1740959728822
NYX	-1.0899753421992	-0.0056988488521361	-6.69647563238678	1.42510712630583e-08	1.04180061799582e-07	9.15348015169184
SKP2	1.04936734686233	-0.205038130245925	6.69359230153707	1.44035967977745e-08	1.05177382130992e-07	9.14294569260863
PLA2G4F	-1.50333617538311	0.0619993262006423	-6.69129351392991	1.4526367270332e-08	1.05955441805448e-07	9.13454714115997
GPR132	1.280168637183	0.0218833402507256	6.68157951670734	1.5056798832256e-08	1.09417204417273e-07	9.09905968497655
AEN	1.26754056724525	-0.251345338561012	6.67741807982206	1.52899084524931e-08	1.10946655224144e-07	9.08385817511964
LRP4	1.68378981068477	-0.0176092928178926	6.67518082523339	1.54167173616509e-08	1.11825404726498e-07	9.07568589584326
BNIP3	1.13601666123673	0.218993948632831	6.67485416669244	1.54353201851881e-08	1.11918919833334e-07	9.07449268959074
MFSD10	1.23991990278151	0.0205706859366595	6.67474727850491	1.54414122072397e-08	1.119216855953e-07	9.07410225332547
PRTG	-1.23769412952309	-0.0497190978406455	-6.67102842021508	1.56548671070556e-08	1.1325940953532e-07	9.06051847344279
RP11-506O24.2	-1.58251064488191	-0.136011044211172	-6.67058223655369	1.56806742308675e-08	1.13404256181097e-07	9.05888874828368
TMEM194A	1.27641345548425	-0.0854749928050561	6.6603942620334	1.62816375896904e-08	1.17663648643194e-07	9.02167854925016
GCGR	-2.11832807517402	-0.134751251943169	-6.6599933212562	1.6305752578404e-08	1.17794487572481e-07	9.02021425717348
C1orf112	1.68033832960576	-0.167228031869306	6.65836914167284	1.64038057616218e-08	1.18415539271464e-07	9.01428259526444
SYTL5	-1.60251584720168	0.127743010597175	-6.65495018275307	1.66121389437002e-08	1.19794871388693e-07	9.00179659410751
AC083843.1	-1.25515545707641	0.000616187082867006	-6.6543726534904	1.66475903139198e-08	1.19954456824454e-07	8.99968751312251
AC012065.7	-1.48357139974875	-0.24620103051329	-6.64634706271405	1.71481248582636e-08	1.23334348292517e-07	8.97038033014704
SNX32	-1.0926042439038	0.135288223377184	-6.64290855201608	1.73671454837834e-08	1.24726524124834e-07	8.95782472588289
TPCN1	-1.00216753231544	0.180451224244505	-6.64211568725486	1.74180428879961e-08	1.25046235370636e-07	8.95492968131312
FLJ35700	-2.52578477143449	0.507312386025433	-6.6406075940334	1.75152651170383e-08	1.25652152645986e-07	8.94942314806442
KCNK3	1.91752710770286	0.198410617079337	6.63953057993534	1.75850282886292e-08	1.26106465213627e-07	8.94549068509136
TMEM140	1.31614944188342	-0.0165084445845185	6.63789170986103	1.76917178686014e-08	1.26786379835178e-07	8.93950683659464
[truncated: 1,488 more rows]
