# Supplementary material for: Identification of 9 key genes and small molecule drugs in clear cell renal cell carcinoma
Source: Aging (Albany NY). 2019 Aug 18;11(16):6029–52. doi: 10.18632/aging.102161 (PMC6738436; doi:10.18632/aging.102161)
Supplement: Supplementary Table 5 [file aging-11-102161-s001.xls]

x
1	ENPP6
2	TMEM213
3	ATP6V0A4
4	DIO1
5	CLCNKB
6	XPNPEP2
7	SLC13A3
8	KNG1
9	TMEM178A
10	PRDX4
11	SLC7A8
12	SLC22A8
13	ERP27
14	SLC12A3
15	SLC26A7
16	RALYL
17	HK2
18	PYGL
19	SLC34A1
20	SLC13A2
21	PACRG
22	CALB1
23	HEPACAM2
24	NUSAP1
25	AGPAT9
26	HRG
27	CLDN8
28	ACADSB
29	KCNJ1
30	DPEP1
31	GGT6
32	CWH43
33	TUBB6
34	CTHRC1
35	TFAP2B
36	SFXN2
37	AFM
38	SLC22A7
39	FGF9
40	ALDOA
41	TCEAL2
42	SLC12A1
43	FABP1
44	UPP2
45	ALDOB
46	CA10
47	TUBAL3
48	DTL
49	CRYAA
50	RP11-999E24.3
51	HS6ST2
52	PCP4
53	FAM57A
54	ASS1
55	IGSF11
56	EMP3
57	TYRP1
58	TNNC1
59	HPD
60	EFHD1
61	RP11-728F11.4
62	SFRP1
63	CENPH
64	GPR110
65	PTTG1
66	FAM151A
67	ATP6V1B1
68	TCF21
69	ANXA9
70	CYP4F2
71	CAV2
72	SLC5A2
73	RRM2
74	NPHS2
75	ACPP
76	MPPED2
77	SLC26A4
78	FXYD4
79	GSTM3
80	SLC47A2
81	IYD
82	SLC2A12
83	CAPN3
84	ARPC1B
85	ESRRG
86	UMOD
87	PLCL1
88	ATAD2
89	CDC6
90	HYKK
91	CLIC5
92	FGF1
93	P4HB
94	NPHS1
95	PRRG2
96	ALB
97	ANK2
98	TPX2
99	PLCXD3
100	GABARAPL1
101	SOST
102	KIAA0101
103	EBI3
104	MELK
105	CYP4F3
106	DANCR
107	ANLN
108	SLC23A1
109	RAB42
110	CCNA2
111	GPC5
112	MAD2L1
113	SLC7A13
114	GPX8
115	VTCN1
116	AHNAK2
117	LHX1
118	DDN
119	DPP6
120	TOP2A
121	CNTN3
122	KIF4A
123	KIF20A
124	PTPRO
125	EHF
126	ELF4
127	NOX4
128	ABCB1
129	CENPU
130	NDC80
131	C16orf89
132	KLK7
133	UHRF1
134	PKM
135	PRC1
136	G6PC
137	CEP55
138	CLDN16
139	RP11-134G8.8
140	IRX1
141	PEG3
142	PCSK1N
143	DEPDC1
144	APOBEC3B
145	NEK2
146	WNK4
147	TOX3
148	SHISA3
149	SEMA6D
150	CDKN1C
151	CCNE2
152	CENPK
153	RAD51AP1
154	PBK
155	CLMN
156	CNTN1
157	ADH1C
158	CDKN3
159	MYH10
160	SGOL2
161	TRIM59
162	SMCO3
163	KLK6
164	KIF14
165	CYP39A1
166	ESRP1
167	SHISA2
168	NR3C2
169	BIRC5
170	CRNDE
171	DLGAP5
172	OLFM4
173	OIP5
174	ASPM
175	FBLN5
176	TACSTD2
177	BUB1B
178	HSPA6
179	TAGLN3
180	FOXM1
181	CDH9
182	DIRAS3
183	DUSP5P1
184	TGFBR3
185	TAC1
186	ERMP1
187	UBE2C
188	NCAPG
189	NUF2
190	KIF11
191	UPK1B
192	EZH2
193	TNFRSF11A
194	SLC2A1
195	CENPE
196	CDC45
197	CDK1
198	SOSTDC1
199	SPC25
200	HPCAL4
201	RARRES2
202	PTGDS
203	S100A14
204	CP
205	TTK
206	LRP4
207	AC012065.7
208	SPAG5
209	TCF19
210	THSD7A
211	NDNF
212	RAD54B
213	CR2
214	RRAD
215	C2orf40
216	RAB37
217	BRIP1
218	PP7080
219	MND1
220	ADH1B
221	AGR3
222	GAS2
223	ABCA8
224	APOD
225	RANBP3L
226	SCG5
227	DNASE1L3
228	MMP9
229	NPY1R
230	TMPRSS4
231	FOXI1
232	GPR64
233	LCN2
234	AQP6
235	PROM1
